# Supplementary material for: A quantitative framework for characterizing the evolutionary history of mammalian gene expression
Source: HighWire-hosted journal article supplement (doi:10.1101/gr.237636.118), 2018-12-14
Supplement: Supplemental_Table_S1.xlsx [file Supplemental_Table_S1.xlsx]

## Sheet: README
Table S1. Accession and alignment statistics for all RNA-seq libraries used in study.
Columns	Explanation
Species	Species
Source	Publication where data was originally generated; Broad indicates newly generated data
SRA/ENA Accession	Accession number for raw data
Library Type	S = Single; P = Paired-end
No. Mapped Reads / Mapped Pairs	Number of mapped reads (for single-end libraries) or mapped pairs (for paired-end libraries)
Used in sample-matched subset	Whether or not this sample is used in analyses that relied on a subset of the data, matched for number of samples per species. Y = Yes; Blank = No

## Sheet: Brain
Species	Source	SRA/ENA accession	Library Type	No. Mapped Reads / Read Pairs	Used in sample-matched subset
Human	Brawand et al.	SRR306843	S	5499108	Y
	Brawand et al.	SRR306841	S	18013221	Y
	Brawand et al.	SRR306840	PE	14177141	N
	Brawand et al.	SRR306839	S	13953657	N
	Brawand et al.	SRR306838	S	20222281	N
	Illumina Bodymap	ERR030882	PE	16278195	Y
Chimp	Brawand et al.	SRR306816	PE	10782411	Y
	Brawand et al.	SRR306815	PE	9522942	N
	Brawand et al.	SRR306814	PE	8141372	N
	Brawand et al.	SRR306813	PE	9389885	N
	Brawand et al.	SRR306812	PE	6795742	N
	Brawand et al.	SRR306811	S	11260268	N
Bonobo	Brawand et al.	SRR306826	PE	9283920	Y
	Brawand et al.	SRR306827	S	14656429	N
	Brawand et al.	SRR306828	S	21653001	N
Gorilla	Brawand et al.	SRR306801	PE	8642828	Y
	Brawand et al.	SRR306800	S	20802766	N
Orangutan	Brawand et al.	SRR306792	PE	8447412	N
	Brawand et al.	SRR306791	S	20604826	N
Rhesus macaque	Brawand et al.	SRR306779	PE	10597413	Y
	Brawand et al.	SRR306778	S	11972075	Y
	Brawand et al.	SRR306777	S	12028176	N
	Merkin et al.	SRR594464	PE	12913976	Y
	Merkin et al.	SRR594465	PE	59939845	Y
	Merkin et al.	SRR594466	PE	17366780	N
Marmoset	Cortez et al.	SRR975174	S	13027181	N
	Cortez et al.	SRR975175	S	16276103	N
Mus musculus	Brawand et al.	SRR306758 - SRR306761	S	52256851	Y
	Brawand et al.	SRR306762 (wild mouse)	S	14989266	Y
	Brawand et al.	SRR306757	S	18462333	Y
	Brawand et al.	SRR594410	PE	23420940	Y
	Brawand et al.	SRR594402	PE	88087207	Y
	Brawand et al.	SRR594393	PE	66840175	N
Rat	Merkin et al.	SRR594437	PE	20237526	Y
	Merkin et al.	SRR594428	PE	58904616	Y
	Merkin et al.	SRR594419	PE	77024478	Y
Rabbit	Broad	SRR6206896	PE	27023857	Y
Dog	Broad	SRR6206897	PE	13557536	Y
Ferret	Broad	SRR6206898	PE	11157022	Y
Cow	Merkin et al.	SRR594491	PE	17839417	Y
	Merkin et al.	SRR594482	PE	14881319	Y
	Merkin et al.	SRR594473	PE	58542689	Y
Opossum	Broad	SRR6206899	PE	23502307	N
	Brawand et al.	SRR306744	S	10526994	Y
	Brawand et al.	SRR306742,SRR306743	S	26277381	Y

## Sheet: Heart
Species	Source	SRA/ENA accession	Library Type	No. Mapped Reads / Read Pairs	Used in sample-matched subset
Human	Illumina Bodymap	ERR030886	PE	63423898	N
	Brawand et al.	SRR306850	S	20297387	Y
	Brawand et al.	SRR306848,SRR306849	S	25874267	Y
	Brawand et al.	SRR306847	S	19684030	N
Chimp	Brawand et al.	SRR306820	S	23314224	Y
	Brawand et al.	SRR306819	S	18827608	N
Bonobo	Brawand et al.	SRR306832	S	17349285	Y
	Brawand et al.	SRR306831	S	16411963	N
Gorilla	Brawand et al.	SRR306805	S	18914005	Y
	Brawand et al.	SRR306804	S	18510229	N
Orangutan	Brawand et al.	SRR306795	S	18087285	N
	Brawand et al.	SRR306794	S	21648455	N
Rhesus macaque	Brawand et al.	SRR306783	S	12427166	Y
	Brawand et al.	SRR306782	S	16677263	Y
	Merkin et al.	SRR594466	PE	25055873	Y
	Merkin et al.	SRR594448	PE	25755851	Y
Marmoset	Cortez et al.	SRR975178	S	18774409	N
	Cortez et al.	SRR975179	S	63423898	N
Mus musculus	Merkin et al.	SRR594412	PE	12932156	Y
	Merkin et al.	SRR594395	PE	28674793	Y
	Brawand et al.	SRR306768 (wild mouse)	S	19090456	Y
	Brawand et al.	SRR306767	S	18302514	Y
	Brawand et al.	SRR306766	S	30810944	Y
Rat	Merkin et al.	SRR594439	PE	18272093	Y
	Merkin et al.	SRR594430	PE	51322397	Y
	Merkin et al.	SRR594421	PE	25018761	Y
Rabbit	Broad	SRR6206900	PE	30651675	Y
Dog	Broad	SRR6206901	PE	18774409	Y
Ferret	Broad	SRR6206902	PE	10154086	Y
Cow	Merkin et al.	SRR594493	PE	26068159	Y
	Merkin et al.	SRR594484	PE	15265174	Y
	Merkin et al.	SRR594475	PE	90312675	Y
Armadillo	Broad	SRR6206903	PE	14486202	N
Opossum	Broad	SRR6206904	PE	41922597	Y
	Brawand et al.	SRR306749,SRR306750	S	29705072	Y
	Brawand et al.	SRR306747,SRR306748	S	16508629	Y

## Sheet: Kidney
Species	Source	SRA/ENA accession	Library Type	No. Mapped Reads / Read Pairs	Used in sample-matched subset
Human	Brawand et al.	SRR306853	S	23528269	Y
	Brawand et al.	SRR306852	S	17218918	Y
	Brawand et al.	SRR306851	S	18501361	N
	Illumina Bodymap	ERR030885	PE	26662423	N
Chimp	Brawand et al.	SRR306822	S	21530402	Y
	Brawand et al.	SRR306821	S	15626661	N
Bonobo	Brawand et al.	SRR306834	S	16253365	Y
	Brawand et al.	SRR306833	S	17673659	N
Gorilla	Brawand et al.	SRR306807	S	18382384	Y
	Brawand et al.	SRR306806	S	13130572	N
Orangutan	Brawand et al.	SRR306797	S	16656755	N
	Brawand et al.	SRR306796	S	17427806	N
Rhesus macaque	Brawand et al.	SRR306785	S	13341384	Y
	Brawand et al.	SRR306784	S	10481382	Y
	Merkin et al.	SRR594467	PE	22569998	Y
	Merkin et al.	SRR594458	PE	68520868	Y
	Merkin et al.	SRR5944549	PE	21564886	Y
Marmoset	Cortez et al.	SRR975180	S	13687220	N
	Cortez et al.	SRR975181	S	14053866	N
Mus musculus	Brawand et al.	SRR306771 (wild mouse)	S	20197550	Y
	Brawand et al.	SRR306770	S	16778364	Y
	Brawand et al.	SRR306769	S	18918779	Y
	Merkin et al.	SRR594413	PE	23911974	Y
	Merkin et al.	SRR594404	PE	99544064	Y
	Merkin et al.	SRR594396	PE	97787526	N
Rat	Merkin et al.	SRR594440	PE	28502057	Y
	Merkin et al.	SRR594431	PE	85740854	Y
	Merkin et al.	SRR594422	PE	89257142	Y
Rabbit	Broad	SRR6206905	PE	30127355	Y
Dog	Broad	SRR6206906	PE	18929244	Y
Ferret	Broad	SRR6206907	PE	10242016	Y
Cow	Merkin et al.	SRR594494	PE	14024565	Y
	Merkin et al.	SRR594495	PE	16881506	Y
	Merkin et al.	SRR594496	PE	70672272	Y
Armadillo	Broad	SRR6206908	PE	9769422	N
Opossum	Brawand et al.	SRR306752	S	12206539	Y
	Brawand et al.	SRR306751	S	12206539	Y

## Sheet: Liver
						DE analysis across increasing branch lenghts
Species	Source	SRA/ENA accession	Library Type	No. Mapped Reads / Read Pairs	Used in sample-matched subset	OUprimate	OUrodent	OUlaurasians	OUlagomorphs
Human	Brawand et al.	SRR306856	S	19491845	Y	1	0	0	0
	Brawand et al.	SRR306854,SRR306855	S	34587985	Y	1	0	0	0
Chimp	Brawand et al.	SRR306824	S	11657755	Y
	Brawand et al.	SRR306823	S	20251478	N
Bonobo	Brawand et al.	SRR306836	S	12955076	Y
	Brawand et al.	SRR306835	S	19311388	N
Gorilla	Brawand et al.	SRR306809	S	23570057	Y
	Brawand et al.	SRR306808	S	21520691	N
Orangutan	Brawand et al.	SRR306799	S	22578059	N
	Brawand et al.	SRR306798	S	14683730	N
Rhesus macaque	Brawand et al.	SRR306787,SRR306788	S	22203282	Y
	Brawand et al.	SRR306786	S	14655511	Y
	Merkin et al.	SRR594468	PE	18325657	Y	1	0	0	0
	Merkin et al.	SRR594459	PE	72194125	Y	1	0	0	0
	Merkin et al.	SRR594450	PE	18580779	Y	1	0	0	0
Marmoset	Cortez et al.	SRR975182	S	20148861	N	1	0	0	0
	Cortez et al.	SRR975183	S	33342337	N	1	0	0	0
Mus musculus	Brawand et al.	SRR306774 (wild mouse)	S	24069285	Y	0	1	0	1
	Brawand et al.	SRR306773	S	13496576	Y	0	1	0	1
	Brawand et al.	SRR306772	S	33155066	Y	0	1	0	1
	Merkin et al.	SRR594414	PE	28195975	Y
	Merkin et al.	SRR594405	PE	114454670	Y
	Merkin et al.	SRR594397	PE	99207594	N
Mus spretus	Wong et al.	ERR476407	PE	24620517	N
	Wong et al.	ERR476403	PE	10556088	N
	Wong et al.	ERR476405	PE	15682142	N
Mus caroli	Wong et al.	ERR476402	PE	16072932	N	0	1	0
	Wong et al.	ERR476404	PE	19663741	N	0	1	0
	Wong et al.	ERR476408	PE	20633370	N	0	1	0
	Wong et al.	ERR476406	PE	9722350	N	0	1	0
Rat	Merkin et al.	SRR594441	PE	31128470	Y	0	1	0	1
	Merkin et al.	SRR594432	PE	105425336	Y	0	1	0	1
	Merkin et al.	SRR594423	PE	20937486	Y	0	1	0	1
Rabbit	Broad	SRR6206910	PE	33296038	Y	0		0	1
Dog	Broad	SRR6206911	PE	16849990	Y	0	0	1	0
Ferret	Broad	SRR6206912	PE	14530874	Y	0	0	1	0
Cow	Merkin et al.	SRR594495	PE	20243040	Y	0	0	1	0
	Merkin et al.	SRR594486	PE	18157235	Y	0	0	1	0
	Merkin et al.	SRR594477	PE	67097141	Y	0	0	1	0
Armadillo	Broad	SRR6206913	PE	18247515	N	0	0	0	0
Opossum	Brawand et al.	SRR306754	S	10055922	Y	0	0	0	0
	Brawand et al.	SRR306753	S	13025044	Y	0	0	0	0
	Broad	SRR6206914	PE	33363523	N	0	0	0	0
						1 = in clade of interest; 0 = in ancestral clade

## Sheet: Lung
Species	Source	SRA/ENA accession	Library Type	No. Mapped Reads / Read Pairs	Used in sample-matched subset
Human	Illumina	ERR030879	PE	55061036	N
Chimp	NHPTR	SRR1758927	PE	13091457	N
	NHPTR	SRR1758926	PE	11101234	N
Rhesus macaque	Merkin et al.	SRR594469	PE	18005509	N
	Merkin et al.	SRR594460	PE	59629475	N
	Merkin et al.	SRR594451	PE	18220551	N
Marmoset	NHPTR	SRR1758985	PE	18016249	N
Mus musculus	Merkin et al.	SRR594415	PE	88974103	N
	Merkin et al.	SRR594406	PE	44470189	N
	Merkin et al.	SRR594398	PE	26528841	N
Rat	Merkin et al.	SRR594442	PE	12516015	N
	Merkin et al.	SRR594433	PE	54181656	N
	Merkin et al.	SRR594424	PE	76366731	N
Rabbit	Broad	SRR6206915	PE	23383458	N
Dog	Broad	SRR6206916	PE	13980423	N
Ferret	Broad	SRR6206917	PE	12093444	N
Cow	Merkin et al.	SRR594496	PE	22005343	N
	Merkin et al.	SRR594487	PE	14388874	N
	Merkin et al.	SRR594478	PE	60937748	N
Armadillo	Broad	SRR6206918	PE	13488960	N
Opossum	Broad	SRR6206919	PE	29372447	N

## Sheet: Skeletal Muscle
Species	Source	SRA/ENA accession	Library Type	No. Mapped Reads / Read Pairs	Used in sample-matched subset
Human	Illumina	ERR030876	PE	60850887	N
Chimp	NHPTR	SRR1758930	PE	10301317	N
	NHPTR	SRR1758929	PE	18286846	N
Rhesus macaque	Merkin et al.	SRR594470	PE	24263370	N
Marmoset	NHPTR	SRR1758987	PE	25706871	N
Mus musculus	Merkin et al.	SRR594416	PE	22105115	N
	Merkin et al.	SRR594407	PE	100288593	N
	Merkin et al.	SRR594399	PE	100958777	N
Rat	Merkin et al.	SRR594443	PE	32704220	N
	Merkin et al.	SRR594434	PE	50295186	N
	Merkin et al.	SRR594425	PE	27911964	N
Rabbit	Broad	SRR6206920	PE	30686885	N
Dog	Broad	SRR6206921	PE	18949329	N
Ferret	Broad	SRR6206922	PE	12887350	N
Cow	Merkin et al.	SRR594497	PE	18104291	N
	Merkin et al.	SRR594488	PE	20003878	N
	Merkin et al.	SRR594479	PE	78788953	N
Armadillo	Broad	SRR6206923	PE	18584160	N
Opossum	Broad	SRR6206924	PE	34124897	N

## Sheet: Testis
Species	Source	SRA/ENA accession	Library Type	No. Mapped Reads / Read Pairs	Used in sample-matched subset
Human	Brawand et al.	SRR306858	S	23826025	Y
	Brawand et al.	SRR306857	S	6541394	Y
	Illumina	ERR030873	PE	10544278	N
Chimp	Brawand et al.	SRR306825	S	13996382	Y
Bonobo	Brawand et al.	SRR306837	S	9562206	Y
Gorilla	Brawand et al.	SRR306810	S	12454266	Y
Rhesus macaque	Brawand et al.	SRR306790	S	19695279	Y
	Brawand et al.	SRR306789	S	12359849	Y
	Merkin et al.	SRR594472	PE	15119998	Y
	Merkin et al.	SRR594463	PE	64934815	Y
	Merkin et al.	SRR594454	PE	17430288	Y
Mus musculus	Brawand et al.	SRR306776 (wild mouse)	S	20700909	Y
	Brawand et al.	SRR306775	S	14016992	Y
	Merkin et al.	SRR594418	PE	27157362	Y
	Merkin et al.	SRR594409	PE	87370968	Y
	Merkin et al.	SRR594401	PE	81859454	Y
Mus spretus	Wong et al.	SRR037139,SRR037140	PE	3431693	N
Rat	Merkin et al.	SRR594427	PE	80546120	Y
	Merkin et al.	SRR594436	PE	78846620	Y
	Merkin et al.	SRR594445	PE	30160353	Y
Rabbit	Broad	SRR6206925	PE	30544003	Y
Dog	Broad	SRR6206926	PE	16959933	Y
Ferret	Broad	SRR6206927	PE	12653543	Y
Cow	Merkin et al.	SRR594499	PE	15323866	Y
	Merkin et al.	SRR594490	PE	24066255	Y
	Merkin et al.	SRR594481	PE	66635448	Y
Opossum	Brawand et al.	SRR306756	S	17558499	Y
	Brawand et al.	SRR306755	S	7705144	Y
	Broad	SRR6206928	PE	26382163	N
