# Supplementary material for: A quantitative framework for characterizing the evolutionary history of mammalian gene expression
Source: HighWire-hosted journal article supplement (doi:10.1101/gr.237636.118), 2018-12-14
Supplement: Supplemental_Table_S2.xlsx [file Supplemental_Table_S2.xlsx]

## Sheet: README
Table S2. GO enrichment results of ranked list of genes, sorted by high-to-low variance or by low-to-high variance for each tissue. Background set is all genes expressed > 5 TPM in the corresponding tissue.
Columns	Explanation
GO Term	Enriched GO term
Description	Description of GO term
P-value	P-value
FDR q-value	FDR q-value
Enrichment	Enrichment ratio
N	Total number of background genes
B	Number of background genes belonging to corresponding GO term
n	Total number of test genes
b	Number of test genes belonging to corresponding GO term
Genes	Names of test genes belonging to corresponding GO term

## Sheet: brain, low to high
GO Term	Description	P-value	FDR q-value	Enrichment	N	B	n	b	Genes
GO:0050852	T cell receptor signaling pathway	0.000169	0.0311	5.08	5485	42	257	10	[SPPL3 - signal peptide peptidase like 3, PSMD1 - proteasome (prosome, macropain) 26s subunit, non-atpase, 1, PSMC4 - proteasome (prosome, macropain) 26s subunit, atpase, 4, PLCG1 - phospholipase c, gamma 1, STOML2 - stomatin (epb72)-like 2, FBXW11 - f-box and wd repeat domain containing 11, FYN - fyn oncogene related to src, fgr, yes, PAK1 - p21 protein (cdc42/rac)-activated kinase 1, PDE4B - ph…
GO:0003713	transcription coactivator activity	5.71e-05	0.0116	6.2	5485	112	79	10	[PKN1 - protein kinase n1, WWC1 - ww and c2 domain containing 1, PPRC1 - peroxisome proliferator-activated receptor gamma, coactivator-related 1, ARID1B - at rich interactive domain 1b (swi1-like), PIAS1 - protein inhibitor of activated stat, 1, PHF2 - phd finger protein 2, ASXL1 - additional sex combs like 1 (drosophila), KDM1A - lysine (k)-specific demethylase 1a, ARID1A - at rich interactive d…
GO:0006401	RNA catabolic process	0.00034	0.0489	4.46	5485	74	183	11	[EIF4A1 - eukaryotic translation initiation factor 4a1, TNKS1BP1 - tankyrase 1 binding protein 1, 182kda, EXOSC10 - exosome component 10, CNOT11 - ccr4-not transcription complex, subunit 11, PARN - poly(a)-specific ribonuclease, WDR61 - wd repeat domain 61, PPP2R1A - protein phosphatase 2, regulatory subunit a, alpha, UPF1 - upf1 regulator of nonsense transcripts homolog (yeast), CASC3 - cancer s…
GO:0008565	protein transporter activity	0.000244	0.0354	3.76	5485	51	372	13	[AP2A1 - adaptor-related protein complex 2, alpha 1 subunit, AP2B1 - adaptor-related protein complex 2, beta 1 subunit, AP1B1 - adaptor-related protein complex 1, beta 1 subunit, TOMM40L - translocase of outer mitochondrial membrane 40 homolog (yeast)-like, AP1S1 - adaptor-related protein complex 1, sigma 1 subunit, XPO6 - exportin 6, XPO1 - exportin 1 (crm1 homolog, yeast), KPNB1 - karyopherin (…
GO:0098693	regulation of synaptic vesicle cycle	2.89e-05	0.0104	3.88	5485	23	800	13	[SYN1 - synapsin i, STXBP1 - syntaxin binding protein 1, FMR1 - fragile x mental retardation 1, ATP2A2 - atpase, ca++ transporting, cardiac muscle, slow twitch 2, TOR1A - torsin family 1, member a (torsin a), NLGN2 - neuroligin 2, CDH2 - cadherin 2, type 1, n-cadherin (neuronal), NAPA - n-ethylmaleimide-sensitive factor attachment protein, alpha, SYT11 - synaptotagmin xi, DNM1L - dynamin 1-like, …
GO:0030119	AP-type membrane coat adaptor complex	0.000232	0.0214	3.12	5485	27	911	14	[AP2A1 - adaptor-related protein complex 2, alpha 1 subunit, AP2B1 - adaptor-related protein complex 2, beta 1 subunit, AP1B1 - adaptor-related protein complex 1, beta 1 subunit, AP1G1 - adaptor-related protein complex 1, gamma 1 subunit, VPS18 - vacuolar protein sorting 18 homolog (s. cerevisiae), GGA3 - golgi-associated, gamma adaptin ear containing, arf binding protein 3, AP3M2 - adaptor-relat…
GO:0016570	histone modification	1.73e-06	0.00242	5.79	5485	149	89	14	[CHD4 - chromodomain helicase dna binding protein 4, VPRBP - vpr (hiv-1) binding protein, EPC2 - enhancer of polycomb homolog 2 (drosophila), EHMT1 - euchromatic histone-lysine n-methyltransferase 1, SIN3A - sin3 transcription regulator family member a, PKN1 - protein kinase n1, PHF2 - phd finger protein 2, MTA2 - metastasis associated 1 family, member 2, KDM3B - lysine (k)-specific demethylase 3…
GO:0003712	transcription cofactor activity	4.97e-06	0.00151	4.96	5485	196	79	14	[PPRC1 - peroxisome proliferator-activated receptor gamma, coactivator-related 1, PIAS1 - protein inhibitor of activated stat, 1, SIN3A - sin3 transcription regulator family member a, ARID1A - at rich interactive domain 1a (swi-like), TCF20 - transcription factor 20 (ar1), PKN1 - protein kinase n1, WWC1 - ww and c2 domain containing 1, ARID1B - at rich interactive domain 1b (swi1-like), PHF2 - ph…
GO:0000988	transcription factor activity, protein binding	5.96e-06	0.00165	4.55	5485	229	79	15	[PPRC1 - peroxisome proliferator-activated receptor gamma, coactivator-related 1, PIAS1 - protein inhibitor of activated stat, 1, SIN3A - sin3 transcription regulator family member a, ARID1A - at rich interactive domain 1a (swi-like), TCF20 - transcription factor 20 (ar1), PKN1 - protein kinase n1, WWC1 - ww and c2 domain containing 1, ARID1B - at rich interactive domain 1b (swi1-like), PHF2 - ph…
GO:0000989	transcription factor activity, transcription factor binding	4.7e-06	0.00159	4.65	5485	224	79	15	[PPRC1 - peroxisome proliferator-activated receptor gamma, coactivator-related 1, PIAS1 - protein inhibitor of activated stat, 1, SIN3A - sin3 transcription regulator family member a, ARID1A - at rich interactive domain 1a (swi-like), TCF20 - transcription factor 20 (ar1), PKN1 - protein kinase n1, WWC1 - ww and c2 domain containing 1, ARID1B - at rich interactive domain 1b (swi1-like), PHF2 - ph…
GO:0016569	covalent chromatin modification	1.91e-07	0.00107	5.14	5485	204	89	17	[CHD4 - chromodomain helicase dna binding protein 4, VPRBP - vpr (hiv-1) binding protein, EPC2 - enhancer of polycomb homolog 2 (drosophila), EHMT1 - euchromatic histone-lysine n-methyltransferase 1, SIN3A - sin3 transcription regulator family member a, BRD4 - bromodomain containing 4, ARID1A - at rich interactive domain 1a (swi-like), PKN1 - protein kinase n1, ARID1B - at rich interactive domain…
GO:0002504	antigen processing and presentation of peptide or polysaccharide antigen via MHC class II	5.18e-05	0.0153	2.9	5485	42	855	19	[AP2A1 - adaptor-related protein complex 2, alpha 1 subunit, AP2B1 - adaptor-related protein complex 2, beta 1 subunit, AP1B1 - adaptor-related protein complex 1, beta 1 subunit, DYNC1I2 - dynein, cytoplasmic 1, intermediate chain 2, DYNC1LI2 - dynein, cytoplasmic 1, light intermediate chain 2, AP1G1 - adaptor-related protein complex 1, gamma 1 subunit, KIFAP3 - kinesin-associated protein 3, DNM2…
GO:0002495	antigen processing and presentation of peptide antigen via MHC class II	5.18e-05	0.0149	2.9	5485	42	855	19	[AP2A1 - adaptor-related protein complex 2, alpha 1 subunit, AP2B1 - adaptor-related protein complex 2, beta 1 subunit, AP1B1 - adaptor-related protein complex 1, beta 1 subunit, DYNC1I2 - dynein, cytoplasmic 1, intermediate chain 2, DYNC1LI2 - dynein, cytoplasmic 1, light intermediate chain 2, AP1G1 - adaptor-related protein complex 1, gamma 1 subunit, KIFAP3 - kinesin-associated protein 3, DNM2…
GO:0019886	antigen processing and presentation of exogenous peptide antigen via MHC class II	3.28e-05	0.0111	2.97	5485	41	855	19	[AP2A1 - adaptor-related protein complex 2, alpha 1 subunit, AP2B1 - adaptor-related protein complex 2, beta 1 subunit, AP1B1 - adaptor-related protein complex 1, beta 1 subunit, DYNC1I2 - dynein, cytoplasmic 1, intermediate chain 2, DYNC1LI2 - dynein, cytoplasmic 1, light intermediate chain 2, AP1G1 - adaptor-related protein complex 1, gamma 1 subunit, KIFAP3 - kinesin-associated protein 3, DNM2…
GO:0000785	chromatin	0.000176	0.0173	2.84	5485	147	276	21	[TNKS1BP1 - tankyrase 1 binding protein 1, 182kda, CHD4 - chromodomain helicase dna binding protein 4, KDM4C - lysine (k)-specific demethylase 4c, EXOSC10 - exosome component 10, BCAS3 - breast carcinoma amplified sequence 3, NIPBL - nipped-b homolog (drosophila), CAPN2 - calpain 2, (m/ii) large subunit, AHCTF1 - at hook containing transcription factor 1, SCC4 - sister chromatid cohesion 4, UBA1 …
GO:0008270	zinc ion binding	0.000106	0.019	2.69	5485	258	182	23	[PMPCA - peptidase (mitochondrial processing) alpha, PIAS1 - protein inhibitor of activated stat, 1, CHD4 - chromodomain helicase dna binding protein 4, ZMYM4 - zinc finger, mym-type 4, SKI - v-ski avian sarcoma viral oncogene homolog, LTA4H - leukotriene a4 hydrolase, EHMT1 - euchromatic histone-lysine n-methyltransferase 1, CNBP - cchc-type zinc finger, nucleic acid binding protein, USP5 - ubiq…
GO:0044265	cellular macromolecule catabolic process	0.000186	0.0326	2.53	5485	280	186	24	[TNKS1BP1 - tankyrase 1 binding protein 1, 182kda, EIF4A1 - eukaryotic translation initiation factor 4a1, EXOSC10 - exosome component 10, PARN - poly(a)-specific ribonuclease, PPP2R1A - protein phosphatase 2, regulatory subunit a, alpha, USP5 - ubiquitin specific peptidase 5 (isopeptidase t), KPNB1 - karyopherin (importin) beta 1, UBA1 - ubiquitin-like modifier activating enzyme 1, SKIV2L2 - supe…
GO:0046914	transition metal ion binding	0.000248	0.0343	2.43	5485	310	182	25	[ZMYM4 - zinc finger, mym-type 4, LTA4H - leukotriene a4 hydrolase, EHMT1 - euchromatic histone-lysine n-methyltransferase 1, APLP2 - amyloid beta (a4) precursor-like protein 2, USP5 - ubiquitin specific peptidase 5 (isopeptidase t), PRNP - prion protein, RPH3A - rabphilin 3a homolog (mouse), PHF2 - phd finger protein 2, ZCCHC2 - zinc finger, cchc domain containing 2, PRDM4 - pr domain containing…
GO:0048002	antigen processing and presentation of peptide antigen	2.1e-05	0.00839	2.57	5485	65	855	26	[PSMD14 - proteasome (prosome, macropain) 26s subunit, non-atpase, 14, AP2A1 - adaptor-related protein complex 2, alpha 1 subunit, PSMD11 - proteasome (prosome, macropain) 26s subunit, non-atpase, 11, AP2B1 - adaptor-related protein complex 2, beta 1 subunit, AP1B1 - adaptor-related protein complex 1, beta 1 subunit, AP1G1 - adaptor-related protein complex 1, gamma 1 subunit, KIFAP3 - kinesin-ass…
GO:0002478	antigen processing and presentation of exogenous peptide antigen	1.04e-05	0.00504	2.65	5485	63	855	26	[PSMD14 - proteasome (prosome, macropain) 26s subunit, non-atpase, 14, AP2A1 - adaptor-related protein complex 2, alpha 1 subunit, PSMD11 - proteasome (prosome, macropain) 26s subunit, non-atpase, 11, AP2B1 - adaptor-related protein complex 2, beta 1 subunit, AP1B1 - adaptor-related protein complex 1, beta 1 subunit, AP1G1 - adaptor-related protein complex 1, gamma 1 subunit, KIFAP3 - kinesin-ass…
GO:0019884	antigen processing and presentation of exogenous antigen	5.71e-06	0.00426	2.66	5485	65	855	27	[PSMD14 - proteasome (prosome, macropain) 26s subunit, non-atpase, 14, AP2A1 - adaptor-related protein complex 2, alpha 1 subunit, PSMD11 - proteasome (prosome, macropain) 26s subunit, non-atpase, 11, AP2B1 - adaptor-related protein complex 2, beta 1 subunit, AP1B1 - adaptor-related protein complex 1, beta 1 subunit, AP1G1 - adaptor-related protein complex 1, gamma 1 subunit, KIFAP3 - kinesin-ass…
GO:0019882	antigen processing and presentation	7.19e-06	0.00474	2.5	5485	77	855	30	[PSMD14 - proteasome (prosome, macropain) 26s subunit, non-atpase, 14, AP2A1 - adaptor-related protein complex 2, alpha 1 subunit, PSMD11 - proteasome (prosome, macropain) 26s subunit, non-atpase, 11, AP2B1 - adaptor-related protein complex 2, beta 1 subunit, AP1B1 - adaptor-related protein complex 1, beta 1 subunit, RAB33A - rab33a, member ras oncogene family, AP1G1 - adaptor-related protein com…
GO:0003682	chromatin binding	0.000137	0.022	2.21	5485	181	425	31	[KDM4C - lysine (k)-specific demethylase 4c, FMR1 - fragile x mental retardation 1, BCAS3 - breast carcinoma amplified sequence 3, NIPBL - nipped-b homolog (drosophila), DHX30 - deah (asp-glu-ala-his) box helicase 30, PATZ1 - poz (btb) and at hook containing zinc finger 1, SIN3A - sin3 transcription regulator family member a, ARID1A - at rich interactive domain 1a (swi-like), SUPT6H - suppressor …
GO:0016032	viral process	1.83e-06	0.00227	2.72	5485	185	338	31	[AP2A1 - adaptor-related protein complex 2, alpha 1 subunit, AP2B1 - adaptor-related protein complex 2, beta 1 subunit, AP1B1 - adaptor-related protein complex 1, beta 1 subunit, FMR1 - fragile x mental retardation 1, VPRBP - vpr (hiv-1) binding protein, NUP205 - nucleoporin 205kda, XPO1 - exportin 1 (crm1 homolog, yeast), GBF1 - golgi brefeldin a resistant guanine nucleotide exchange factor 1, S…
GO:0044403	symbiosis, encompassing mutualism through parasitism	1.83e-06	0.00205	2.72	5485	185	338	31	[AP2A1 - adaptor-related protein complex 2, alpha 1 subunit, AP2B1 - adaptor-related protein complex 2, beta 1 subunit, AP1B1 - adaptor-related protein complex 1, beta 1 subunit, FMR1 - fragile x mental retardation 1, VPRBP - vpr (hiv-1) binding protein, NUP205 - nucleoporin 205kda, XPO1 - exportin 1 (crm1 homolog, yeast), GBF1 - golgi brefeldin a resistant guanine nucleotide exchange factor 1, S…
GO:1903311	regulation of mRNA metabolic process	0.000213	0.0356	2.06	5485	94	936	33	[TOB1 - transducer of erbb2, 1, PSMD14 - proteasome (prosome, macropain) 26s subunit, non-atpase, 14, PSMD11 - proteasome (prosome, macropain) 26s subunit, non-atpase, 11, CNOT1 - ccr4-not transcription complex, subunit 1, FMR1 - fragile x mental retardation 1, SRRM4 - serine/arginine repetitive matrix 4, PNPT1 - polyribonucleotide nucleotidyltransferase 1, PARN - poly(a)-specific ribonuclease, M…
GO:0010629	negative regulation of gene expression	0.000254	0.0395	2.09	5485	531	168	34	[FMR1 - fragile x mental retardation 1, EXOSC10 - exosome component 10, VPRBP - vpr (hiv-1) binding protein, ZBTB2 - zinc finger and btb domain containing 2, PARN - poly(a)-specific ribonuclease, EHMT1 - euchromatic histone-lysine n-methyltransferase 1, SIN3A - sin3 transcription regulator family member a, PRNP - prion protein, ARID1A - at rich interactive domain 1a (swi-like), ASXL1 - additional…
GO:0090304	nucleic acid metabolic process	6.97e-05	0.0166	2.04	5485	1211	80	36	[PPRC1 - peroxisome proliferator-activated receptor gamma, coactivator-related 1, HBP1 - hmg-box transcription factor 1, DHX8 - deah (asp-glu-ala-his) box polypeptide 8, VPRBP - vpr (hiv-1) binding protein, PARN - poly(a)-specific ribonuclease, EHMT1 - euchromatic histone-lysine n-methyltransferase 1, GPS1 - g protein pathway suppressor 1, SIN3A - sin3 transcription regulator family member a, SKI…
GO:0006397	mRNA processing	0.000267	0.0404	1.95	5485	163	692	40	[HNRNPUL1 - heterogeneous nuclear ribonucleoprotein u-like 1, DHX8 - deah (asp-glu-ala-his) box polypeptide 8, SRRM4 - serine/arginine repetitive matrix 4, FMR1 - fragile x mental retardation 1, SPEN - spen homolog, transcriptional regulator (drosophila), CWC27 - cwc27 spliceosome-associated protein homolog (s. cerevisiae), SKIV2L2 - superkiller viralicidic activity 2-like 2 (s. cerevisiae), ADAR…
GO:0006725	cellular aromatic compound metabolic process	7.49e-05	0.0171	1.91	5485	1417	81	40	[PPRC1 - peroxisome proliferator-activated receptor gamma, coactivator-related 1, HBP1 - hmg-box transcription factor 1, DHX8 - deah (asp-glu-ala-his) box polypeptide 8, VPRBP - vpr (hiv-1) binding protein, PARN - poly(a)-specific ribonuclease, EHMT1 - euchromatic histone-lysine n-methyltransferase 1, SIN3A - sin3 transcription regulator family member a, GPS1 - g protein pathway suppressor 1, SKI…
GO:0046483	heterocycle metabolic process	7e-05	0.0163	1.92	5485	1412	81	40	[PPRC1 - peroxisome proliferator-activated receptor gamma, coactivator-related 1, HBP1 - hmg-box transcription factor 1, DHX8 - deah (asp-glu-ala-his) box polypeptide 8, VPRBP - vpr (hiv-1) binding protein, PARN - poly(a)-specific ribonuclease, EHMT1 - euchromatic histone-lysine n-methyltransferase 1, SIN3A - sin3 transcription regulator family member a, GPS1 - g protein pathway suppressor 1, SKI…
GO:0006139	nucleobase-containing compound metabolic process	2.91e-05	0.0102	1.99	5485	1364	81	40	[PPRC1 - peroxisome proliferator-activated receptor gamma, coactivator-related 1, HBP1 - hmg-box transcription factor 1, DHX8 - deah (asp-glu-ala-his) box polypeptide 8, VPRBP - vpr (hiv-1) binding protein, PARN - poly(a)-specific ribonuclease, EHMT1 - euchromatic histone-lysine n-methyltransferase 1, SIN3A - sin3 transcription regulator family member a, GPS1 - g protein pathway suppressor 1, SKI…
GO:0017016	Ras GTPase binding	0.00011	0.0186	1.94	5485	120	964	41	[RAB11FIP3 - rab11 family interacting protein 3 (class ii), NSF - n-ethylmaleimide-sensitive factor, AP1G1 - adaptor-related protein complex 1, gamma 1 subunit, DOCK4 - dedicator of cytokinesis 4, DAAM1 - dishevelled associated activator of morphogenesis 1, RPH3A - rabphilin 3a homolog (mouse), XPO1 - exportin 1 (crm1 homolog, yeast), CORO1C - coronin, actin binding protein, 1c, RABGAP1 - rab gtp…
GO:0033043	regulation of organelle organization	0.000329	0.0478	1.88	5485	446	281	43	[KDM4C - lysine (k)-specific demethylase 4c, FMR1 - fragile x mental retardation 1, SPTAN1 - spectrin, alpha, non-erythrocytic 1, MARK2 - map/microtubule affinity-regulating kinase 2, EXOSC10 - exosome component 10, BCAS3 - breast carcinoma amplified sequence 3, CAPN2 - calpain 2, (m/ii) large subunit, NIPBL - nipped-b homolog (drosophila), VPS18 - vacuolar protein sorting 18 homolog (s. cerevisi…
GO:0031267	small GTPase binding	8.79e-05	0.0167	1.93	5485	127	964	43	[RAB11FIP3 - rab11 family interacting protein 3 (class ii), NSF - n-ethylmaleimide-sensitive factor, AP1G1 - adaptor-related protein complex 1, gamma 1 subunit, GGA3 - golgi-associated, gamma adaptin ear containing, arf binding protein 3, DOCK4 - dedicator of cytokinesis 4, DAAM1 - dishevelled associated activator of morphogenesis 1, RPH3A - rabphilin 3a homolog (mouse), XPO1 - exportin 1 (crm1 h…
GO:0048193	Golgi vesicle transport	0.000103	0.021	1.9	5485	147	884	45	[AP2A1 - adaptor-related protein complex 2, alpha 1 subunit, SPTAN1 - spectrin, alpha, non-erythrocytic 1, COG3 - component of oligomeric golgi complex 3, SCAMP3 - secretory carrier membrane protein 3, NSF - n-ethylmaleimide-sensitive factor, AP1G1 - adaptor-related protein complex 1, gamma 1 subunit, KIFAP3 - kinesin-associated protein 3, GCC2 - grip and coiled-coil domain containing 2, GOLGB1 -…
GO:0010605	negative regulation of macromolecule metabolic process	0.000138	0.0266	1.86	5485	826	168	47	[FMR1 - fragile x mental retardation 1, EXOSC10 - exosome component 10, VPRBP - vpr (hiv-1) binding protein, ZBTB2 - zinc finger and btb domain containing 2, PARN - poly(a)-specific ribonuclease, EHMT1 - euchromatic histone-lysine n-methyltransferase 1, APLP2 - amyloid beta (a4) precursor-like protein 2, SIN3A - sin3 transcription regulator family member a, PRNP - prion protein, GPS1 - g protein …
GO:0051020	GTPase binding	4.63e-05	0.0101	1.9	5485	144	964	48	[RAB11FIP3 - rab11 family interacting protein 3 (class ii), NSF - n-ethylmaleimide-sensitive factor, AP1G1 - adaptor-related protein complex 1, gamma 1 subunit, GGA3 - golgi-associated, gamma adaptin ear containing, arf binding protein 3, DOCK4 - dedicator of cytokinesis 4, DAAM1 - dishevelled associated activator of morphogenesis 1, RPH3A - rabphilin 3a homolog (mouse), XPO1 - exportin 1 (crm1 h…
GO:0051246	regulation of protein metabolic process	0.000244	0.0385	1.75	5485	905	180	52	[MARK2 - map/microtubule affinity-regulating kinase 2, FMR1 - fragile x mental retardation 1, APLP2 - amyloid beta (a4) precursor-like protein 2, SIN3A - sin3 transcription regulator family member a, CORO1C - coronin, actin binding protein, 1c, HERPUD1 - homocysteine-inducible, endoplasmic reticulum stress-inducible, ubiquitin-like domain member 1, CNOT11 - ccr4-not transcription complex, subunit…
GO:0051704	multi-organism process	2.22e-05	0.00828	1.93	5485	335	442	52	[HNRNPUL1 - heterogeneous nuclear ribonucleoprotein u-like 1, AP2A1 - adaptor-related protein complex 2, alpha 1 subunit, AP2B1 - adaptor-related protein complex 2, beta 1 subunit, AP1B1 - adaptor-related protein complex 1, beta 1 subunit, FMR1 - fragile x mental retardation 1, VPRBP - vpr (hiv-1) binding protein, MTOR - mechanistic target of rapamycin (serine/threonine kinase), ABAT - 4-aminobut…
GO:1901360	organic cyclic compound metabolic process	0.000236	0.0383	1.66	5485	1487	122	55	[DHX8 - deah (asp-glu-ala-his) box polypeptide 8, PPRC1 - peroxisome proliferator-activated receptor gamma, coactivator-related 1, FMR1 - fragile x mental retardation 1, EXOSC10 - exosome component 10, VPRBP - vpr (hiv-1) binding protein, EPC2 - enhancer of polycomb homolog 2 (drosophila), EHMT1 - euchromatic histone-lysine n-methyltransferase 1, PARN - poly(a)-specific ribonuclease, ATP1A2 - atp…
GO:0042886	amide transport	8.64e-05	0.0186	1.79	5485	502	348	57	[AP2A1 - adaptor-related protein complex 2, alpha 1 subunit, AP2B1 - adaptor-related protein complex 2, beta 1 subunit, AP1B1 - adaptor-related protein complex 1, beta 1 subunit, XPO1 - exportin 1 (crm1 homolog, yeast), RPH3A - rabphilin 3a homolog (mouse), PTPRN - protein tyrosine phosphatase, receptor type, n, VPS35 - vacuolar protein sorting 35 homolog (s. cerevisiae), RABGAP1 - rab gtpase act…
GO:0015833	peptide transport	5.28e-05	0.0144	1.81	5485	495	348	57	[AP2A1 - adaptor-related protein complex 2, alpha 1 subunit, AP2B1 - adaptor-related protein complex 2, beta 1 subunit, AP1B1 - adaptor-related protein complex 1, beta 1 subunit, XPO1 - exportin 1 (crm1 homolog, yeast), RPH3A - rabphilin 3a homolog (mouse), PTPRN - protein tyrosine phosphatase, receptor type, n, VPS35 - vacuolar protein sorting 35 homolog (s. cerevisiae), RABGAP1 - rab gtpase act…
GO:0015031	protein transport	3.67e-05	0.0118	1.83	5485	490	348	57	[AP2A1 - adaptor-related protein complex 2, alpha 1 subunit, AP2B1 - adaptor-related protein complex 2, beta 1 subunit, AP1B1 - adaptor-related protein complex 1, beta 1 subunit, XPO1 - exportin 1 (crm1 homolog, yeast), RPH3A - rabphilin 3a homolog (mouse), PTPRN - protein tyrosine phosphatase, receptor type, n, VPS35 - vacuolar protein sorting 35 homolog (s. cerevisiae), RABGAP1 - rab gtpase act…
GO:0016071	mRNA metabolic process	4.21e-07	0.00157	2.03	5485	226	692	58	[HNRNPUL1 - heterogeneous nuclear ribonucleoprotein u-like 1, DHX8 - deah (asp-glu-ala-his) box polypeptide 8, FMR1 - fragile x mental retardation 1, DDX6 - dead (asp-glu-ala-asp) box helicase 6, CWC27 - cwc27 spliceosome-associated protein homolog (s. cerevisiae), EXOSC10 - exosome component 10, PARN - poly(a)-specific ribonuclease, SUPT6H - suppressor of ty 6 homolog (s. cerevisiae), AHCYL1 - a…
GO:0044427	chromosomal part	1.59e-05	0.00235	1.8	5485	278	681	62	[SYN1 - synapsin i, ELL - elongation factor rna polymerase ii, KDM4C - lysine (k)-specific demethylase 4c, FMR1 - fragile x mental retardation 1, DDX6 - dead (asp-glu-ala-asp) box helicase 6, EXOSC10 - exosome component 10, CAPN2 - calpain 2, (m/ii) large subunit, MCRS1 - microspherule protein 1, SIN3A - sin3 transcription regulator family member a, XPO1 - exportin 1 (crm1 homolog, yeast), ORC5 -…
GO:0071705	nitrogen compound transport	5.24e-05	0.0147	1.72	5485	615	348	67	[AP2A1 - adaptor-related protein complex 2, alpha 1 subunit, AP2B1 - adaptor-related protein complex 2, beta 1 subunit, AP1B1 - adaptor-related protein complex 1, beta 1 subunit, FMR1 - fragile x mental retardation 1, RPH3A - rabphilin 3a homolog (mouse), XPO1 - exportin 1 (crm1 homolog, yeast), PTPRN - protein tyrosine phosphatase, receptor type, n, SUPT6H - suppressor of ty 6 homolog (s. cerevi…
GO:0044419	interspecies interaction between organisms	4.57e-06	0.00393	1.75	5485	229	957	70	[CCNK - cyclin k, AP2A1 - adaptor-related protein complex 2, alpha 1 subunit, AP2B1 - adaptor-related protein complex 2, beta 1 subunit, AP1B1 - adaptor-related protein complex 1, beta 1 subunit, FMR1 - fragile x mental retardation 1, DDX6 - dead (asp-glu-ala-asp) box helicase 6, VPRBP - vpr (hiv-1) binding protein, AP1G1 - adaptor-related protein complex 1, gamma 1 subunit, USF1 - upstream trans…
GO:0006325	chromatin organization	9.67e-07	0.00271	1.78	5485	231	987	74	[ZMYND8 - zinc finger, mynd-type containing 8, KDM4C - lysine (k)-specific demethylase 4c, CHD6 - chromodomain helicase dna binding protein 6, VPRBP - vpr (hiv-1) binding protein, EPC2 - enhancer of polycomb homolog 2 (drosophila), EHMT1 - euchromatic histone-lysine n-methyltransferase 1, NSD1 - nuclear receptor binding set domain protein 1, MCRS1 - microspherule protein 1, WHSC1L1 - wolf-hirschh…
GO:0006886	intracellular protein transport	3.2e-06	0.00299	1.7	5485	287	911	81	[TOB1 - transducer of erbb2, 1, AP2A1 - adaptor-related protein complex 2, alpha 1 subunit, AP2B1 - adaptor-related protein complex 2, beta 1 subunit, COG3 - component of oligomeric golgi complex 3, AP1B1 - adaptor-related protein complex 1, beta 1 subunit, AP1G1 - adaptor-related protein complex 1, gamma 1 subunit, KIFAP3 - kinesin-associated protein 3, AP3M2 - adaptor-related protein complex 3,…
GO:0044456	synapse part	8.89e-05	0.0109	1.57	5485	355	805	82	[LRRC4B - leucine rich repeat containing 4b, ZMYND8 - zinc finger, mynd-type containing 8, SYN1 - synapsin i, SYN2 - synapsin ii, FMR1 - fragile x mental retardation 1, NLGN2 - neuroligin 2, ATP1A1 - atpase, na+/k+ transporting, alpha 1 polypeptide, ATP1A2 - atpase, na+/k+ transporting, alpha 2 polypeptide, CDH2 - cadherin 2, type 1, n-cadherin (neuronal), CHRM3 - cholinergic receptor, muscarinic…
GO:0005794	Golgi apparatus	0.000386	0.0335	1.51	5485	355	852	83	[SYN1 - synapsin i, COG3 - component of oligomeric golgi complex 3, AP1B1 - adaptor-related protein complex 1, beta 1 subunit, AP1G1 - adaptor-related protein complex 1, gamma 1 subunit, TRAPPC3 - trafficking protein particle complex 3, CAPN2 - calpain 2, (m/ii) large subunit, KIFAP3 - kinesin-associated protein 3, TMEM165 - transmembrane protein 165, DOCK4 - dedicator of cytokinesis 4, SACM1L - …
GO:1902494	catalytic complex	1.97e-08	4.83e-06	1.72	5485	515	689	111	[DHX8 - deah (asp-glu-ala-his) box polypeptide 8, EXOSC10 - exosome component 10, CWC27 - cwc27 spliceosome-associated protein homolog (s. cerevisiae), BCKDK - branched chain ketoacid dehydrogenase kinase, SIN3A - sin3 transcription regulator family member a, ABAT - 4-aminobutyrate aminotransferase, DDB1 - damage-specific dna binding protein 1, 127kda, DCTN1 - dynactin 1, ANKIB1 - ankyrin repeat …
GO:0043234	protein complex	6.6e-08	1.39e-05	1.64	5485	1060	369	117	[FMR1 - fragile x mental retardation 1, BCKDK - branched chain ketoacid dehydrogenase kinase, SIN3A - sin3 transcription regulator family member a, ORC5 - origin recognition complex, subunit 5, CORO1C - coronin, actin binding protein, 1c, KLC4 - kinesin light chain 4, RABGAP1 - rab gtpase activating protein 1, COX15 - cytochrome c oxidase assembly homolog 15 (yeast), CNOT11 - ccr4-not transcripti…
GO:0044451	nucleoplasm part	1.71e-07	3.15e-05	1.6	5485	414	994	120	[DHX8 - deah (asp-glu-ala-his) box polypeptide 8, ELL - elongation factor rna polymerase ii, FMR1 - fragile x mental retardation 1, SIN3A - sin3 transcription regulator family member a, TCF20 - transcription factor 20 (ar1), PTPN23 - protein tyrosine phosphatase, non-receptor type 23, EPAS1 - endothelial pas domain protein 1, RPRD2 - regulation of nuclear pre-mrna domain containing 2, GTF2H3 - ge…
GO:0045184	establishment of protein localization	4.05e-05	0.0126	1.45	5485	518	888	122	[TOB1 - transducer of erbb2, 1, KIFAP3 - kinesin-associated protein 3, CORO1C - coronin, actin binding protein, 1c, COPB2 - coatomer protein complex, subunit beta 2 (beta prime), RABGAP1 - rab gtpase activating protein 1, PTPN23 - protein tyrosine phosphatase, non-receptor type 23, C2CD5 - c2 calcium-dependent domain containing 5, APBA1 - amyloid beta (a4) precursor protein-binding, family a, mem…
GO:0003723	RNA binding	3.33e-08	2.53e-05	1.65	5485	579	699	122	[DHX8 - deah (asp-glu-ala-his) box polypeptide 8, DDX6 - dead (asp-glu-ala-asp) box helicase 6, MARK2 - map/microtubule affinity-regulating kinase 2, FMR1 - fragile x mental retardation 1, EXOSC10 - exosome component 10, PARN - poly(a)-specific ribonuclease, CDKN2AIP - cdkn2a interacting protein, TNRC6A - trinucleotide repeat containing 6a, DHX30 - deah (asp-glu-ala-his) box helicase 30, SIN3A - …
GO:0016192	vesicle-mediated transport	1.44e-05	0.00599	1.44	5485	583	899	138	[SPTAN1 - spectrin, alpha, non-erythrocytic 1, KIFAP3 - kinesin-associated protein 3, APLP2 - amyloid beta (a4) precursor-like protein 2, APLP1 - amyloid beta (a4) precursor-like protein 1, RIN2 - ras and rab interactor 2, CORO1C - coronin, actin binding protein, 1c, COPB2 - coatomer protein complex, subunit beta 2 (beta prime), DCTN1 - dynactin 1, IQGAP1 - iq motif containing gtpase activating p…
GO:0046907	intracellular transport	1.54e-06	0.00247	1.49	5485	566	926	142	[TOB1 - transducer of erbb2, 1, SPTAN1 - spectrin, alpha, non-erythrocytic 1, KIFAP3 - kinesin-associated protein 3, AP3M2 - adaptor-related protein complex 3, mu 2 subunit, COPB2 - coatomer protein complex, subunit beta 2 (beta prime), RABGAP1 - rab gtpase activating protein 1, DCTN1 - dynactin 1, C2CD5 - c2 calcium-dependent domain containing 5, PTPN23 - protein tyrosine phosphatase, non-recept…
GO:0008104	protein localization	0.000223	0.0367	1.35	5485	687	913	154	[TOB1 - transducer of erbb2, 1, KIFAP3 - kinesin-associated protein 3, AP3M2 - adaptor-related protein complex 3, mu 2 subunit, CDH2 - cadherin 2, type 1, n-cadherin (neuronal), SIN3A - sin3 transcription regulator family member a, CNTNAP1 - contactin associated protein 1, CORO1C - coronin, actin binding protein, 1c, COPB2 - coatomer protein complex, subunit beta 2 (beta prime), RABGAP1 - rab gtp…
GO:0033036	macromolecule localization	6.91e-05	0.0168	1.37	5485	698	913	159	[TOB1 - transducer of erbb2, 1, EXOSC10 - exosome component 10, KIFAP3 - kinesin-associated protein 3, AP3M2 - adaptor-related protein complex 3, mu 2 subunit, CDH2 - cadherin 2, type 1, n-cadherin (neuronal), SIN3A - sin3 transcription regulator family member a, CNTNAP1 - contactin associated protein 1, CORO1C - coronin, actin binding protein, 1c, COPB2 - coatomer protein complex, subunit beta 2…
GO:0051649	establishment of localization in cell	8.88e-08	0.000994	1.51	5485	625	926	159	[TOB1 - transducer of erbb2, 1, SPTAN1 - spectrin, alpha, non-erythrocytic 1, KIFAP3 - kinesin-associated protein 3, AP3M2 - adaptor-related protein complex 3, mu 2 subunit, COPB2 - coatomer protein complex, subunit beta 2 (beta prime), RABGAP1 - rab gtpase activating protein 1, DCTN1 - dynactin 1, C2CD5 - c2 calcium-dependent domain containing 5, PTPN23 - protein tyrosine phosphatase, non-recept…
GO:0003677	DNA binding	1.41e-06	0.000536	1.43	5485	658	992	170	[MLX - mlx, max dimerization protein, ZMYND8 - zinc finger, mynd-type containing 8, APLP2 - amyloid beta (a4) precursor-like protein 2, RFX4 - regulatory factor x, 4 (influences hla class ii expression), SIN3A - sin3 transcription regulator family member a, PATZ1 - poz (btb) and at hook containing zinc finger 1, ORC5 - origin recognition complex, subunit 5, TOX4 - tox high mobility group box fami…
GO:0006351	transcription, DNA-templated	5.42e-05	0.0144	1.35	5485	704	986	171	[MLX - mlx, max dimerization protein, ZMYND8 - zinc finger, mynd-type containing 8, CCNK - cyclin k, ELL - elongation factor rna polymerase ii, RFX4 - regulatory factor x, 4 (influences hla class ii expression), SIN3A - sin3 transcription regulator family member a, PATZ1 - poz (btb) and at hook containing zinc finger 1, WHSC1L1 - wolf-hirschhorn syndrome candidate 1-like 1, TCF20 - transcription …
GO:0097659	nucleic acid-templated transcription	5.42e-05	0.0141	1.35	5485	704	986	171	[MLX - mlx, max dimerization protein, ZMYND8 - zinc finger, mynd-type containing 8, CCNK - cyclin k, ELL - elongation factor rna polymerase ii, RFX4 - regulatory factor x, 4 (influences hla class ii expression), SIN3A - sin3 transcription regulator family member a, PATZ1 - poz (btb) and at hook containing zinc finger 1, WHSC1L1 - wolf-hirschhorn syndrome candidate 1-like 1, TCF20 - transcription …
GO:0051641	cellular localization	6.06e-05	0.0154	1.34	5485	791	926	179	[TOB1 - transducer of erbb2, 1, MARK2 - map/microtubule affinity-regulating kinase 2, SPTAN1 - spectrin, alpha, non-erythrocytic 1, EXOSC10 - exosome component 10, KIFAP3 - kinesin-associated protein 3, AP3M2 - adaptor-related protein complex 3, mu 2 subunit, CDH2 - cadherin 2, type 1, n-cadherin (neuronal), SIN3A - sin3 transcription regulator family member a, CNTNAP1 - contactin associated prot…
GO:0032774	RNA biosynthetic process	3.34e-05	0.011	1.34	5485	776	986	187	[MLX - mlx, max dimerization protein, CCNK - cyclin k, ZMYND8 - zinc finger, mynd-type containing 8, ELL - elongation factor rna polymerase ii, RFX4 - regulatory factor x, 4 (influences hla class ii expression), SIN3A - sin3 transcription regulator family member a, WHSC1L1 - wolf-hirschhorn syndrome candidate 1-like 1, PATZ1 - poz (btb) and at hook containing zinc finger 1, TCF20 - transcription …
GO:0019899	enzyme binding	1.12e-09	1.13e-06	1.52	5485	718	951	189	[TOB1 - transducer of erbb2, 1, CCNK - cyclin k, ELL - elongation factor rna polymerase ii, PARN - poly(a)-specific ribonuclease, CDH2 - cadherin 2, type 1, n-cadherin (neuronal), ABAT - 4-aminobutyrate aminotransferase, CORO1C - coronin, actin binding protein, 1c, RABGAP1 - rab gtpase activating protein 1, ANKIB1 - ankyrin repeat and ibr domain containing 1, IQGAP1 - iq motif containing gtpase a…
GO:0051171	regulation of nitrogen compound metabolic process	1.11e-05	0.00518	1.32	5485	1806	465	202	[MARK2 - map/microtubule affinity-regulating kinase 2, EXOSC10 - exosome component 10, PATZ1 - poz (btb) and at hook containing zinc finger 1, ABAT - 4-aminobutyrate aminotransferase, CORO1C - coronin, actin binding protein, 1c, CNOT11 - ccr4-not transcription complex, subunit 11, SUPT20H - suppressor of ty 20 homolog (s. cerevisiae), DPF2 - d4, zinc and double phd fingers family 2, UPF1 - upf1 r…
GO:0060255	regulation of macromolecule metabolic process	1.53e-06	0.00286	1.34	5485	1861	465	211	[MARK2 - map/microtubule affinity-regulating kinase 2, EXOSC10 - exosome component 10, PATZ1 - poz (btb) and at hook containing zinc finger 1, CORO1C - coronin, actin binding protein, 1c, CNOT11 - ccr4-not transcription complex, subunit 11, SUPT20H - suppressor of ty 20 homolog (s. cerevisiae), DPF2 - d4, zinc and double phd fingers family 2, UPF1 - upf1 regulator of nonsense transcripts homolog …
GO:0051179	localization	7.79e-05	0.0171	1.28	5485	1625	584	221	[SPTAN1 - spectrin, alpha, non-erythrocytic 1, MARK2 - map/microtubule affinity-regulating kinase 2, EXOSC10 - exosome component 10, CORO1C - coronin, actin binding protein, 1c, RABGAP1 - rab gtpase activating protein 1, COX15 - cytochrome c oxidase assembly homolog 15 (yeast), DENND1A - denn/madd domain containing 1a, UPF1 - upf1 regulator of nonsense transcripts homolog (yeast), REEP2 - recepto…
GO:0016070	RNA metabolic process	5.48e-06	0.00438	1.3	5485	1062	986	249	[CCNK - cyclin k, ZMYND8 - zinc finger, mynd-type containing 8, ELL - elongation factor rna polymerase ii, CWC27 - cwc27 spliceosome-associated protein homolog (s. cerevisiae), EXOSC10 - exosome component 10, RFX4 - regulatory factor x, 4 (influences hla class ii expression), AARS - alanyl-trna synthetase, DHX30 - deah (asp-glu-ala-his) box helicase 30, WHSC1L1 - wolf-hirschhorn syndrome candidat…
GO:0051252	regulation of RNA metabolic process	2.17e-05	0.0084	1.27	5485	1164	999	269	[CCNK - cyclin k, ZMYND8 - zinc finger, mynd-type containing 8, TOB1 - transducer of erbb2, 1, ELL - elongation factor rna polymerase ii, RFX4 - regulatory factor x, 4 (influences hla class ii expression), WHSC1L1 - wolf-hirschhorn syndrome candidate 1-like 1, PATZ1 - poz (btb) and at hook containing zinc finger 1, ZNF821 - zinc finger protein 821, EPAS1 - endothelial pas domain protein 1, COMMD9…
GO:2000112	regulation of cellular macromolecule biosynthetic process	4.59e-05	0.0139	1.25	5485	1250	999	284	[TOB1 - transducer of erbb2, 1, CCNK - cyclin k, ZMYND8 - zinc finger, mynd-type containing 8, ELL - elongation factor rna polymerase ii, EXOSC10 - exosome component 10, RFX4 - regulatory factor x, 4 (influences hla class ii expression), AARS - alanyl-trna synthetase, WHSC1L1 - wolf-hirschhorn syndrome candidate 1-like 1, PATZ1 - poz (btb) and at hook containing zinc finger 1, ZNF821 - zinc finge…
GO:0010556	regulation of macromolecule biosynthetic process	6.76e-05	0.0168	1.24	5485	1276	999	288	[TOB1 - transducer of erbb2, 1, CCNK - cyclin k, ZMYND8 - zinc finger, mynd-type containing 8, ELL - elongation factor rna polymerase ii, EXOSC10 - exosome component 10, RFX4 - regulatory factor x, 4 (influences hla class ii expression), AARS - alanyl-trna synthetase, WHSC1L1 - wolf-hirschhorn syndrome candidate 1-like 1, PATZ1 - poz (btb) and at hook containing zinc finger 1, ZNF821 - zinc finge…
GO:0051234	establishment of localization	8.03e-06	0.00428	1.27	5485	1451	860	288	[SPTAN1 - spectrin, alpha, non-erythrocytic 1, KIFAP3 - kinesin-associated protein 3, CORO1C - coronin, actin binding protein, 1c, RABGAP1 - rab gtpase activating protein 1, IQGAP1 - iq motif containing gtpase activating protein 1, COX15 - cytochrome c oxidase assembly homolog 15 (yeast), COMMD9 - comm domain containing 9, DENND1A - denn/madd domain containing 1a, UPF1 - upf1 regulator of nonsens…
GO:0019219	regulation of nucleobase-containing compound metabolic process	0.000109	0.0218	1.23	5485	1287	999	289	[TOB1 - transducer of erbb2, 1, CCNK - cyclin k, ZMYND8 - zinc finger, mynd-type containing 8, ELL - elongation factor rna polymerase ii, EXOSC10 - exosome component 10, RFX4 - regulatory factor x, 4 (influences hla class ii expression), WHSC1L1 - wolf-hirschhorn syndrome candidate 1-like 1, PATZ1 - poz (btb) and at hook containing zinc finger 1, ZNF821 - zinc finger protein 821, EPAS1 - endothel…
GO:0005654	nucleoplasm	2.52e-11	9.29e-09	1.41	5485	1124	998	289	[CCNK - cyclin k, ELL - elongation factor rna polymerase ii, VEZT - vezatin, adherens junctions transmembrane protein, MARK2 - map/microtubule affinity-regulating kinase 2, CWC27 - cwc27 spliceosome-associated protein homolog (s. cerevisiae), EXOSC10 - exosome component 10, CDKN2AIP - cdkn2a interacting protein, ANKRD11 - ankyrin repeat domain 11, WHSC1L1 - wolf-hirschhorn syndrome candidate 1-li…
GO:0006810	transport	7.84e-06	0.00439	1.26	5485	1422	891	292	[TOB1 - transducer of erbb2, 1, SPTAN1 - spectrin, alpha, non-erythrocytic 1, KIFAP3 - kinesin-associated protein 3, CORO1C - coronin, actin binding protein, 1c, RABGAP1 - rab gtpase activating protein 1, IQGAP1 - iq motif containing gtpase activating protein 1, COX15 - cytochrome c oxidase assembly homolog 15 (yeast), COMMD9 - comm domain containing 9, DENND1A - denn/madd domain containing 1a, U…
GO:0003676	nucleic acid binding	2.38e-10	3.62e-07	1.38	5485	1176	987	293	[ZMYND8 - zinc finger, mynd-type containing 8, MARK2 - map/microtubule affinity-regulating kinase 2, EXOSC10 - exosome component 10, CDKN2AIP - cdkn2a interacting protein, RFX4 - regulatory factor x, 4 (influences hla class ii expression), AARS - alanyl-trna synthetase, DHX30 - deah (asp-glu-ala-his) box helicase 30, PATZ1 - poz (btb) and at hook containing zinc finger 1, ZNF821 - zinc finger pro…
GO:0031326	regulation of cellular biosynthetic process	7.62e-05	0.0171	1.23	5485	1333	999	299	[TOB1 - transducer of erbb2, 1, CCNK - cyclin k, ZMYND8 - zinc finger, mynd-type containing 8, ELL - elongation factor rna polymerase ii, EXOSC10 - exosome component 10, RFX4 - regulatory factor x, 4 (influences hla class ii expression), AARS - alanyl-trna synthetase, WHSC1L1 - wolf-hirschhorn syndrome candidate 1-like 1, PATZ1 - poz (btb) and at hook containing zinc finger 1, ZNF821 - zinc finge…
GO:0009889	regulation of biosynthetic process	0.000171	0.0309	1.22	5485	1361	999	302	[TOB1 - transducer of erbb2, 1, CCNK - cyclin k, ZMYND8 - zinc finger, mynd-type containing 8, ELL - elongation factor rna polymerase ii, EXOSC10 - exosome component 10, RFX4 - regulatory factor x, 4 (influences hla class ii expression), AARS - alanyl-trna synthetase, WHSC1L1 - wolf-hirschhorn syndrome candidate 1-like 1, PATZ1 - poz (btb) and at hook containing zinc finger 1, ZNF821 - zinc finge…
GO:0010468	regulation of gene expression	6.3e-06	0.00441	1.25	5485	1365	999	312	[TOB1 - transducer of erbb2, 1, CCNK - cyclin k, ZMYND8 - zinc finger, mynd-type containing 8, ELL - elongation factor rna polymerase ii, EXOSC10 - exosome component 10, RFX4 - regulatory factor x, 4 (influences hla class ii expression), AARS - alanyl-trna synthetase, WHSC1L1 - wolf-hirschhorn syndrome candidate 1-like 1, PATZ1 - poz (btb) and at hook containing zinc finger 1, ZNF821 - zinc finge…
GO:0043227	membrane-bounded organelle	0.000176	0.0185	1.16	5485	3183	488	328	[VEZT - vezatin, adherens junctions transmembrane protein, SPTAN1 - spectrin, alpha, non-erythrocytic 1, MARK2 - map/microtubule affinity-regulating kinase 2, EXOSC10 - exosome component 10, SACM1L - sac1 suppressor of actin mutations 1-like (yeast), DHX30 - deah (asp-glu-ala-his) box helicase 30, BCKDK - branched chain ketoacid dehydrogenase kinase, ANKRD11 - ankyrin repeat domain 11, ABAT - 4-a…
GO:0016043	cellular component organization	7.21e-06	0.00449	1.24	5485	1752	838	331	[ZMYND8 - zinc finger, mynd-type containing 8, SPTAN1 - spectrin, alpha, non-erythrocytic 1, MARK2 - map/microtubule affinity-regulating kinase 2, RFX4 - regulatory factor x, 4 (influences hla class ii expression), DHX30 - deah (asp-glu-ala-his) box helicase 30, CORO1C - coronin, actin binding protein, 1c, RABGAP1 - rab gtpase activating protein 1, EPAS1 - endothelial pas domain protein 1, FARP1 …
GO:0071840	cellular component organization or biogenesis	7.34e-06	0.00433	1.23	5485	1765	838	333	[ZMYND8 - zinc finger, mynd-type containing 8, SPTAN1 - spectrin, alpha, non-erythrocytic 1, MARK2 - map/microtubule affinity-regulating kinase 2, AAMP - angio-associated, migratory cell protein, RFX4 - regulatory factor x, 4 (influences hla class ii expression), DHX30 - deah (asp-glu-ala-his) box helicase 30, CORO1C - coronin, actin binding protein, 1c, RABGAP1 - rab gtpase activating protein 1,…
GO:0005829	cytosol	3.47e-05	0.00464	1.21	5485	1769	925	360	[VEZT - vezatin, adherens junctions transmembrane protein, SPTAN1 - spectrin, alpha, non-erythrocytic 1, EXOSC10 - exosome component 10, KIFAP3 - kinesin-associated protein 3, AAMP - angio-associated, migratory cell protein, AARS - alanyl-trna synthetase, ANKRD11 - ankyrin repeat domain 11, DHX30 - deah (asp-glu-ala-his) box helicase 30, RABGAP1 - rab gtpase activating protein 1, IQGAP1 - iq moti…
GO:0032991	macromolecular complex	7.37e-11	2.17e-08	1.32	5485	1727	915	379	[TOB1 - transducer of erbb2, 1, CCNK - cyclin k, ELL - elongation factor rna polymerase ii, CWC27 - cwc27 spliceosome-associated protein homolog (s. cerevisiae), EXOSC10 - exosome component 10, KIFAP3 - kinesin-associated protein 3, AP3M2 - adaptor-related protein complex 3, mu 2 subunit, AAMP - angio-associated, migratory cell protein, SACM1L - sac1 suppressor of actin mutations 1-like (yeast), …
GO:0044428	nuclear part	5.01e-13	3.69e-10	1.35	5485	1567	998	386	[ELL - elongation factor rna polymerase ii, VEZT - vezatin, adherens junctions transmembrane protein, EXOSC10 - exosome component 10, CDKN2AIP - cdkn2a interacting protein, PATZ1 - poz (btb) and at hook containing zinc finger 1, DENND1A - denn/madd domain containing 1a, SUPT20H - suppressor of ty 20 homolog (s. cerevisiae), ACLY - atp citrate lyase, PLRG1 - pleiotropic regulator 1, H2AFY - h2a hi…
GO:0080090	regulation of primary metabolic process	1e-05	0.0051	1.2	5485	1862	996	406	[ZMYND8 - zinc finger, mynd-type containing 8, ELL - elongation factor rna polymerase ii, EXOSC10 - exosome component 10, AARS - alanyl-trna synthetase, PATZ1 - poz (btb) and at hook containing zinc finger 1, ABAT - 4-aminobutyrate aminotransferase, CORO1C - coronin, actin binding protein, 1c, ZNF821 - zinc finger protein 821, CNOT11 - ccr4-not transcription complex, subunit 11, SUPT20H - suppres…
GO:1901363	heterocyclic compound binding	1.07e-07	6.54e-05	1.24	5485	1855	987	413	[ZMYND8 - zinc finger, mynd-type containing 8, EXOSC10 - exosome component 10, CDKN2AIP - cdkn2a interacting protein, AARS - alanyl-trna synthetase, PATZ1 - poz (btb) and at hook containing zinc finger 1, ABAT - 4-aminobutyrate aminotransferase, ZNF821 - zinc finger protein 821, ZNF410 - zinc finger protein 410, ZNF407 - zinc finger protein 407, ACLY - atp citrate lyase, ACO1 - aconitase 1, solub…
GO:0097159	organic cyclic compound binding	2.24e-07	0.000114	1.23	5485	1880	987	416	[ZMYND8 - zinc finger, mynd-type containing 8, EXOSC10 - exosome component 10, CDKN2AIP - cdkn2a interacting protein, AARS - alanyl-trna synthetase, PATZ1 - poz (btb) and at hook containing zinc finger 1, ABAT - 4-aminobutyrate aminotransferase, ZNF821 - zinc finger protein 821, ZNF410 - zinc finger protein 410, ZNF407 - zinc finger protein 407, ACLY - atp citrate lyase, ACO1 - aconitase 1, solub…
GO:0031323	regulation of cellular metabolic process	1.36e-06	0.00306	1.21	5485	1913	996	421	[ZMYND8 - zinc finger, mynd-type containing 8, ELL - elongation factor rna polymerase ii, EXOSC10 - exosome component 10, AARS - alanyl-trna synthetase, PATZ1 - poz (btb) and at hook containing zinc finger 1, ABAT - 4-aminobutyrate aminotransferase, CORO1C - coronin, actin binding protein, 1c, ZNF821 - zinc finger protein 821, CNOT11 - ccr4-not transcription complex, subunit 11, SUPT20H - suppres…
GO:0044424	intracellular part	4.54e-07	7.42e-05	1.1	5485	4592	478	439	[VEZT - vezatin, adherens junctions transmembrane protein, SPTAN1 - spectrin, alpha, non-erythrocytic 1, EXOSC10 - exosome component 10, GGCX - gamma-glutamyl carboxylase, AAMP - angio-associated, migratory cell protein, ABAT - 4-aminobutyrate aminotransferase, PATZ1 - poz (btb) and at hook containing zinc finger 1, CORO1C - coronin, actin binding protein, 1c, RABGAP1 - rab gtpase activating prot…
GO:0019222	regulation of metabolic process	3.04e-06	0.00309	1.2	5485	2035	996	442	[ZMYND8 - zinc finger, mynd-type containing 8, ELL - elongation factor rna polymerase ii, EXOSC10 - exosome component 10, AARS - alanyl-trna synthetase, PATZ1 - poz (btb) and at hook containing zinc finger 1, ABAT - 4-aminobutyrate aminotransferase, CORO1C - coronin, actin binding protein, 1c, ZNF821 - zinc finger protein 821, CNOT11 - ccr4-not transcription complex, subunit 11, SUPT20H - suppres…
GO:0003674	molecular_function	3.64e-05	0.00922	1.05	5485	5100	456	444	[VEZT - vezatin, adherens junctions transmembrane protein, SPTAN1 - spectrin, alpha, non-erythrocytic 1, EXOSC10 - exosome component 10, AAMP - angio-associated, migratory cell protein, ABAT - 4-aminobutyrate aminotransferase, PATZ1 - poz (btb) and at hook containing zinc finger 1, CORO1C - coronin, actin binding protein, 1c, RABGAP1 - rab gtpase activating protein 1, COX15 - cytochrome c oxidase…
GO:0044260	cellular macromolecule metabolic process	0.000307	0.0452	1.15	5485	2273	968	460	[ZMYND8 - zinc finger, mynd-type containing 8, ELL - elongation factor rna polymerase ii, SPTAN1 - spectrin, alpha, non-erythrocytic 1, EXOSC10 - exosome component 10, GGCX - gamma-glutamyl carboxylase, AARS - alanyl-trna synthetase, PATZ1 - poz (btb) and at hook containing zinc finger 1, ZNF821 - zinc finger protein 821, CNOT11 - ccr4-not transcription complex, subunit 11, PPP1R15B - protein pho…
GO:0044464	cell part	0.000139	0.0157	1.05	5485	5012	478	460	[VEZT - vezatin, adherens junctions transmembrane protein, SPTAN1 - spectrin, alpha, non-erythrocytic 1, EXOSC10 - exosome component 10, GGCX - gamma-glutamyl carboxylase, AAMP - angio-associated, migratory cell protein, ABAT - 4-aminobutyrate aminotransferase, PATZ1 - poz (btb) and at hook containing zinc finger 1, CORO1C - coronin, actin binding protein, 1c, RABGAP1 - rab gtpase activating prot…
GO:0065007	biological regulation	1.41e-05	0.00608	1.12	5485	3529	781	562	[ZMYND8 - zinc finger, mynd-type containing 8, ELL - elongation factor rna polymerase ii, SPTAN1 - spectrin, alpha, non-erythrocytic 1, EXOSC10 - exosome component 10, GGCX - gamma-glutamyl carboxylase, AAMP - angio-associated, migratory cell protein, CDKN2AIP - cdkn2a interacting protein, AARS - alanyl-trna synthetase, TMEM101 - transmembrane protein 101, ABAT - 4-aminobutyrate aminotransferase,…
GO:0044446	intracellular organelle part	1.25e-12	6.14e-10	1.23	5485	3074	836	574	[ELL - elongation factor rna polymerase ii, VEZT - vezatin, adherens junctions transmembrane protein, SPTAN1 - spectrin, alpha, non-erythrocytic 1, EXOSC10 - exosome component 10, GGCX - gamma-glutamyl carboxylase, CDKN2AIP - cdkn2a interacting protein, ABAT - 4-aminobutyrate aminotransferase, PATZ1 - poz (btb) and at hook containing zinc finger 1, RABGAP1 - rab gtpase activating protein 1, COX15…
GO:0044422	organelle part	4.64e-13	6.83e-10	1.21	5485	3125	836	576	[ELL - elongation factor rna polymerase ii, VEZT - vezatin, adherens junctions transmembrane protein, SPTAN1 - spectrin, alpha, non-erythrocytic 1, EXOSC10 - exosome component 10, GGCX - gamma-glutamyl carboxylase, CDKN2AIP - cdkn2a interacting protein, ABAT - 4-aminobutyrate aminotransferase, PATZ1 - poz (btb) and at hook containing zinc finger 1, RABGAP1 - rab gtpase activating protein 1, COX15…
GO:0050794	regulation of cellular process	9.93e-05	0.0206	1.11	5485	3192	915	593	[ZMYND8 - zinc finger, mynd-type containing 8, ELL - elongation factor rna polymerase ii, SPTAN1 - spectrin, alpha, non-erythrocytic 1, EXOSC10 - exosome component 10, AAMP - angio-associated, migratory cell protein, CDKN2AIP - cdkn2a interacting protein, AARS - alanyl-trna synthetase, TMEM101 - transmembrane protein 101, ABAT - 4-aminobutyrate aminotransferase, PATZ1 - poz (btb) and at hook cont…
GO:0050789	regulation of biological process	1.31e-05	0.00588	1.12	5485	3349	915	624	[ZMYND8 - zinc finger, mynd-type containing 8, ELL - elongation factor rna polymerase ii, SPTAN1 - spectrin, alpha, non-erythrocytic 1, EXOSC10 - exosome component 10, AAMP - angio-associated, migratory cell protein, CDKN2AIP - cdkn2a interacting protein, AARS - alanyl-trna synthetase, TMEM101 - transmembrane protein 101, ABAT - 4-aminobutyrate aminotransferase, PATZ1 - poz (btb) and at hook cont…
GO:0005515	protein binding	2.93e-11	8.9e-08	1.14	5485	3707	915	708	[ZMYND8 - zinc finger, mynd-type containing 8, ELL - elongation factor rna polymerase ii, VEZT - vezatin, adherens junctions transmembrane protein, SPTAN1 - spectrin, alpha, non-erythrocytic 1, EXOSC10 - exosome component 10, AAMP - angio-associated, migratory cell protein, CDKN2AIP - cdkn2a interacting protein, ABAT - 4-aminobutyrate aminotransferase, CORO1C - coronin, actin binding protein, 1c,…
GO:0005488	binding	9.82e-07	0.000426	1.07	5485	4499	937	823	[ELL - elongation factor rna polymerase ii, VEZT - vezatin, adherens junctions transmembrane protein, EXOSC10 - exosome component 10, AAMP - angio-associated, migratory cell protein, CDKN2AIP - cdkn2a interacting protein, AARS - alanyl-trna synthetase, ABAT - 4-aminobutyrate aminotransferase, ZNF821 - zinc finger protein 821, CNOT11 - ccr4-not transcription complex, subunit 11, SUPT20H - suppress…

## Sheet: brain, high to low
GO Term	Description	P-value	FDR q-value	Enrichment	N	B	n	b	Genes
GO:0005576	extracellular region	1.81e-11	2.66e-08	1.99	5480	347	787	99	[SPP1 - secreted phosphoprotein 1, IGFBPL1 - insulin-like growth factor binding protein-like 1, INHA - inhibin, alpha, SPARC - secreted protein, acidic, cysteine-rich (osteonectin), ILF2 - interleukin enhancer binding factor 2, TUB - tubby bipartite transcription factor, MMP2 - matrix metallopeptidase 2 (gelatinase a, 72kda gelatinase, 72kda type iv collagenase), LOXL1 - lysyl oxidase-like 1, TTR…
GO:0031012	extracellular matrix	4.02e-10	2.95e-07	2.63	5480	141	738	50	[EGFL7 - egf-like-domain, multiple 7, NES - nestin, GPLD1 - glycosylphosphatidylinositol specific phospholipase d1, LINGO3 - leucine rich repeat and ig domain containing 3, CHI3L1 - chitinase 3-like 1 (cartilage glycoprotein-39), MMP2 - matrix metallopeptidase 2 (gelatinase a, 72kda gelatinase, 72kda type iv collagenase), LOXL1 - lysyl oxidase-like 1, HAPLN2 - hyaluronan and proteoglycan link pro…
GO:0044421	extracellular region part	5.42e-09	2.66e-06	1.47	5480	1097	671	198	[GFRA1 - gdnf family receptor alpha 1, SEMA3G - sema domain, immunoglobulin domain (ig), short basic domain, secreted, (semaphorin) 3g, PHLDA3 - pleckstrin homology-like domain, family a, member 3, SEMA4C - sema domain, immunoglobulin domain (ig), transmembrane domain (tm) and short cytoplasmic domain, (semaphorin) 4c, BPHL - biphenyl hydrolase-like (serine hydrolase), ABCA1 - atp-binding cassett…
GO:0005581	collagen trimer	1.76e-08	6.46e-06	5	5480	23	762	16	[C1QTNF5 - c1q and tumor necrosis factor related protein 5, COL5A3 - collagen, type v, alpha 3, COL9A2 - collagen, type ix, alpha 2, COL9A3 - collagen, type ix, alpha 3, C1QA - complement component 1, q subcomponent, a chain, C1QB - complement component 1, q subcomponent, b chain, C1QL1 - complement component 1, q subcomponent-like 1, C1QC - complement component 1, q subcomponent, c chain, COL5A2…
GO:0005615	extracellular space	9.73e-08	2.86e-05	1.83	5480	280	864	81	[GLB1L - galactosidase, beta 1-like, SEMA3G - sema domain, immunoglobulin domain (ig), short basic domain, secreted, (semaphorin) 3g, GNL1 - guanine nucleotide binding protein-like 1, SEMA4C - sema domain, immunoglobulin domain (ig), transmembrane domain (tm) and short cytoplasmic domain, (semaphorin) 4c, EGFL7 - egf-like-domain, multiple 7, TAC3 - tachykinin 3, SPP1 - secreted phosphoprotein 1, …
GO:0005578	proteinaceous extracellular matrix	3.5e-07	8.59e-05	2.6	5480	80	895	34	[LTBP4 - latent transforming growth factor beta binding protein 4, PHOSPHO1 - phosphatase, orphan 1, HAPLN1 - hyaluronan and proteoglycan link protein 1, ADAMTSL2 - adamts-like 2, FGF1 - fibroblast growth factor 1 (acidic), VWC2 - von willebrand factor c domain containing 2, GPLD1 - glycosylphosphatidylinositol specific phospholipase d1, LINGO3 - leucine rich repeat and ig domain containing 3, LT…
GO:0070062	extracellular exosome	1.15e-06	0.000241	1.56	5480	851	509	123	[GFRA1 - gdnf family receptor alpha 1, SEMA3G - sema domain, immunoglobulin domain (ig), short basic domain, secreted, (semaphorin) 3g, PHLDA3 - pleckstrin homology-like domain, family a, member 3, BPHL - biphenyl hydrolase-like (serine hydrolase), SDSL - serine dehydratase-like, SPP1 - secreted phosphoprotein 1, TMEM33 - transmembrane protein 33, DNPH1 - 2'-deoxynucleoside 5'-phosphate n-hydrola…
GO:0043230	extracellular organelle	1.4e-06	0.000258	1.55	5480	863	509	124	[GFRA1 - gdnf family receptor alpha 1, SEMA3G - sema domain, immunoglobulin domain (ig), short basic domain, secreted, (semaphorin) 3g, PHLDA3 - pleckstrin homology-like domain, family a, member 3, BPHL - biphenyl hydrolase-like (serine hydrolase), SDSL - serine dehydratase-like, SPP1 - secreted phosphoprotein 1, TMEM33 - transmembrane protein 33, DNPH1 - 2'-deoxynucleoside 5'-phosphate n-hydrola…
GO:1903561	extracellular vesicle	2.41e-06	0.000394	1.54	5480	862	509	123	[GFRA1 - gdnf family receptor alpha 1, SEMA3G - sema domain, immunoglobulin domain (ig), short basic domain, secreted, (semaphorin) 3g, PHLDA3 - pleckstrin homology-like domain, family a, member 3, BPHL - biphenyl hydrolase-like (serine hydrolase), SDSL - serine dehydratase-like, SPP1 - secreted phosphoprotein 1, TMEM33 - transmembrane protein 33, DNPH1 - 2'-deoxynucleoside 5'-phosphate n-hydrola…
GO:0005583	fibrillar collagen trimer	1.11e-05	0.00163	8.44	5480	6	649	6	[COL1A1 - collagen, type i, alpha 1, COL5A3 - collagen, type v, alpha 3, COL3A1 - collagen, type iii, alpha 1, COL11A2 - collagen, type xi, alpha 2, COL5A2 - collagen, type v, alpha 2, COL5A1 - collagen, type v, alpha 1]
GO:0005788	endoplasmic reticulum lumen	1.47e-05	0.00197	3.58	5480	104	280	19	[TXNDC16 - thioredoxin domain containing 16, CSF1 - colony stimulating factor 1 (macrophage), COL5A3 - collagen, type v, alpha 3, COL9A3 - collagen, type ix, alpha 3, WFS1 - wolfram syndrome 1 (wolframin), PENK - proenkephalin, COL6A1 - collagen, type vi, alpha 1, IGFBP3 - insulin-like growth factor binding protein 3, COL1A1 - collagen, type i, alpha 1, CERCAM - cerebral endothelial cell adhesion…
GO:0043062	extracellular structure organization	1.34e-06	0.0075	2.64	5480	90	738	32	[FLOT1 - flotillin 1, COL5A3 - collagen, type v, alpha 3, HAPLN1 - hyaluronan and proteoglycan link protein 1, MYH11 - myosin, heavy chain 11, smooth muscle, SPP1 - secreted phosphoprotein 1, COL1A1 - collagen, type i, alpha 1, LOXL3 - lysyl oxidase-like 3, ITGB8 - integrin, beta 8, COL3A1 - collagen, type iii, alpha 1, SPARC - secreted protein, acidic, cysteine-rich (osteonectin), ITGAV - integr…
GO:0044449	contractile fiber part	0.000104	0.0127	3.64	5480	63	358	15	[MMP2 - matrix metallopeptidase 2 (gelatinase a, 72kda gelatinase, 72kda type iv collagenase), NEBL - nebulette, TPM4 - tropomyosin 4, PSMA6 - proteasome (prosome, macropain) subunit, alpha type, 6, TPM2 - tropomyosin 2 (beta), MYH11 - myosin, heavy chain 11, smooth muscle, RPL15 - ribosomal protein l15, SYNPO2 - synaptopodin 2, ACTA1 - actin, alpha 1, skeletal muscle, NPNT - nephronectin, OBSL1 …
GO:0030198	extracellular matrix organization	1.34e-06	0.015	2.64	5480	90	738	32	[FLOT1 - flotillin 1, COL5A3 - collagen, type v, alpha 3, HAPLN1 - hyaluronan and proteoglycan link protein 1, MYH11 - myosin, heavy chain 11, smooth muscle, SPP1 - secreted phosphoprotein 1, COL1A1 - collagen, type i, alpha 1, LOXL3 - lysyl oxidase-like 3, ITGB8 - integrin, beta 8, COL3A1 - collagen, type iii, alpha 1, SPARC - secreted protein, acidic, cysteine-rich (osteonectin), ITGAV - integr…
GO:0072562	blood microparticle	0.000394	0.0362	6.23	5480	17	362	7	[STOM - stomatin, ACTA1 - actin, alpha 1, skeletal muscle, CIB2 - calcium and integrin binding family member 2, HSPA2 - heat shock 70kda protein 2, ALB - albumin, C1QB - complement component 1, q subcomponent, b chain, C1QC - complement component 1, q subcomponent, c chain]
GO:0044243	multicellular organismal catabolic process	1.49e-05	0.0417	4.89	5480	19	649	11	[COL1A1 - collagen, type i, alpha 1, MMP2 - matrix metallopeptidase 2 (gelatinase a, 72kda gelatinase, 72kda type iv collagenase), COL5A3 - collagen, type v, alpha 3, COL3A1 - collagen, type iii, alpha 1, COL25A1 - collagen, type xxv, alpha 1, COL11A2 - collagen, type xi, alpha 2, MMP15 - matrix metallopeptidase 15 (membrane-inserted), CTSS - cathepsin s, COL5A2 - collagen, type v, alpha 2, COL6A…
GO:0031982	vesicle	0.000537	0.0465	1.39	5480	1202	388	118	[NIPA2 - non imprinted in prader-willi/angelman syndrome 2, PHLDA3 - pleckstrin homology-like domain, family a, member 3, BPHL - biphenyl hydrolase-like (serine hydrolase), SLC31A2 - solute carrier family 31 (copper transporter), member 2, SDSL - serine dehydratase-like, SPP1 - secreted phosphoprotein 1, DNPH1 - 2'-deoxynucleoside 5'-phosphate n-hydrolase 1, CD74 - cd74 molecule, major histocompa…
GO:0030017	sarcomere	0.000596	0.0487	5.02	5480	11	694	7	[MMP2 - matrix metallopeptidase 2 (gelatinase a, 72kda gelatinase, 72kda type iv collagenase), ACTA1 - actin, alpha 1, skeletal muscle, PSMA6 - proteasome (prosome, macropain) subunit, alpha type, 6, PYROXD1 - pyridine nucleotide-disulphide oxidoreductase domain 1, TNNT2 - troponin t type 2 (cardiac), MYH7 - myosin, heavy chain 7, cardiac muscle, beta, TNNI3 - troponin i type 3 (cardiac)]

## Sheet: heart, low to high
GO Term	Description	P-value	FDR q-value	Enrichment	N	B	n	b	Genes
GO:0005654	nucleoplasm	2.14e-16	2.99e-13	1.51	4208	974	862	302	[TRIM65 - tripartite motif containing 65, ARAP1 - arfgap with rhogap domain, ankyrin repeat and ph domain 1, RFC4 - replication factor c (activator 1) 4, 37kda, VEZT - vezatin, adherens junctions transmembrane protein, MARK2 - map/microtubule affinity-regulating kinase 2, HSF2 - heat shock transcription factor 2, CASZ1 - castor zinc finger 1, RFC1 - replication factor c (activator 1) 1, 145kda, T…
GO:0044428	nuclear part	3.89e-15	2.72e-12	1.38	4208	1364	879	394	[ARAP1 - arfgap with rhogap domain, ankyrin repeat and ph domain 1, VEZT - vezatin, adherens junctions transmembrane protein, TADA1 - transcriptional adaptor 1, PNN - pinin, desmosome associated protein, PATZ1 - poz (btb) and at hook containing zinc finger 1, METTL14 - methyltransferase like 14, PODXL - podocalyxin-like, SUPT20H - suppressor of ty 20 homolog (s. cerevisiae), ACLY - atp citrate ly…
GO:0090304	nucleic acid metabolic process	6.93e-16	7.27e-12	1.46	4208	999	981	339	[CCNK - cyclin k, ZMYND8 - zinc finger, mynd-type containing 8, RFC4 - replication factor c (activator 1) 4, 37kda, TSN - translin, HSF2 - heat shock transcription factor 2, EXOSC10 - exosome component 10, CASZ1 - castor zinc finger 1, RFC1 - replication factor c (activator 1) 1, 145kda, TADA1 - transcriptional adaptor 1, NCOA5 - nuclear receptor coactivator 5, AARS - alanyl-trna synthetase, DHX3…
GO:0044260	cellular macromolecule metabolic process	7.29e-15	3.82e-11	1.32	4208	1850	763	443	[ZMYND8 - zinc finger, mynd-type containing 8, SPTAN1 - spectrin, alpha, non-erythrocytic 1, NCOA5 - nuclear receptor coactivator 5, AARS - alanyl-trna synthetase, PNN - pinin, desmosome associated protein, PATZ1 - poz (btb) and at hook containing zinc finger 1, FBXO18 - f-box protein, helicase, 18, METTL14 - methyltransferase like 14, GALNT10 - udp-n-acetyl-alpha-d-galactosamine:polypeptide n-ac…
GO:0043170	macromolecule metabolic process	7.12e-14	1.86e-10	1.27	4208	1992	763	460	[ZMYND8 - zinc finger, mynd-type containing 8, SPTAN1 - spectrin, alpha, non-erythrocytic 1, NCOA5 - nuclear receptor coactivator 5, AARS - alanyl-trna synthetase, PNN - pinin, desmosome associated protein, FBXO18 - f-box protein, helicase, 18, PATZ1 - poz (btb) and at hook containing zinc finger 1, METTL14 - methyltransferase like 14, SPG7 - spastic paraplegia 7 (pure and complicated autosomal r…
GO:0016070	RNA metabolic process	5.76e-14	2.01e-10	1.46	4208	888	981	303	[CCNK - cyclin k, ZMYND8 - zinc finger, mynd-type containing 8, TSN - translin, HSF2 - heat shock transcription factor 2, EXOSC10 - exosome component 10, CASZ1 - castor zinc finger 1, RFC1 - replication factor c (activator 1) 1, 145kda, TADA1 - transcriptional adaptor 1, NCOA5 - nuclear receptor coactivator 5, AARS - alanyl-trna synthetase, DHX30 - deah (asp-glu-ala-his) box helicase 30, PNN - pi…
GO:0003676	nucleic acid binding	8.69e-14	2.4e-10	1.43	4208	981	991	330	[ZMYND8 - zinc finger, mynd-type containing 8, RFC4 - replication factor c (activator 1) 4, 37kda, MARK2 - map/microtubule affinity-regulating kinase 2, TSN - translin, HSF2 - heat shock transcription factor 2, EXOSC10 - exosome component 10, CASZ1 - castor zinc finger 1, RFC1 - replication factor c (activator 1) 1, 145kda, NCOA5 - nuclear receptor coactivator 5, AARS - alanyl-trna synthetase, DH…
GO:0010468	regulation of gene expression	1.42e-12	2.48e-09	1.35	4208	1151	981	362	[CCNK - cyclin k, ZMYND8 - zinc finger, mynd-type containing 8, HSF2 - heat shock transcription factor 2, EXOSC10 - exosome component 10, CASZ1 - castor zinc finger 1, RFC1 - replication factor c (activator 1) 1, 145kda, TADA1 - transcriptional adaptor 1, NCOA5 - nuclear receptor coactivator 5, AARS - alanyl-trna synthetase, PNN - pinin, desmosome associated protein, CEBPZ - ccaat/enhancer bindin…
GO:0019219	regulation of nucleobase-containing compound metabolic process	1.2e-12	2.5e-09	1.55	4208	1066	525	206	[RFC4 - replication factor c (activator 1) 4, 37kda, HSF2 - heat shock transcription factor 2, CASZ1 - castor zinc finger 1, NCOA5 - nuclear receptor coactivator 5, WHSC1L1 - wolf-hirschhorn syndrome candidate 1-like 1, FBXO18 - f-box protein, helicase, 18, PATZ1 - poz (btb) and at hook containing zinc finger 1, METTL14 - methyltransferase like 14, ELK3 - elk3, ets-domain protein (srf accessory p…
GO:0060255	regulation of macromolecule metabolic process	2.05e-12	3.07e-09	1.4	4208	1550	539	278	[RFC4 - replication factor c (activator 1) 4, 37kda, MARK2 - map/microtubule affinity-regulating kinase 2, HSF2 - heat shock transcription factor 2, CASZ1 - castor zinc finger 1, NCOA5 - nuclear receptor coactivator 5, AARS - alanyl-trna synthetase, PATZ1 - poz (btb) and at hook containing zinc finger 1, FBXO18 - f-box protein, helicase, 18, WHSC1L1 - wolf-hirschhorn syndrome candidate 1-like 1, …
GO:2000112	regulation of cellular macromolecule biosynthetic process	2.49e-12	3.26e-09	1.48	4208	1049	650	240	[RFC4 - replication factor c (activator 1) 4, 37kda, HSF2 - heat shock transcription factor 2, CASZ1 - castor zinc finger 1, NCOA5 - nuclear receptor coactivator 5, AARS - alanyl-trna synthetase, PNN - pinin, desmosome associated protein, WHSC1L1 - wolf-hirschhorn syndrome candidate 1-like 1, PATZ1 - poz (btb) and at hook containing zinc finger 1, FBXO18 - f-box protein, helicase, 18, METTL14 - m…
GO:0051171	regulation of nitrogen compound metabolic process	5.42e-12	6.31e-09	1.41	4208	1494	539	269	[RFC4 - replication factor c (activator 1) 4, 37kda, MARK2 - map/microtubule affinity-regulating kinase 2, HSF2 - heat shock transcription factor 2, CASZ1 - castor zinc finger 1, NCOA5 - nuclear receptor coactivator 5, AARS - alanyl-trna synthetase, WHSC1L1 - wolf-hirschhorn syndrome candidate 1-like 1, FBXO18 - f-box protein, helicase, 18, PATZ1 - poz (btb) and at hook containing zinc finger 1, …
GO:0010556	regulation of macromolecule biosynthetic process	6.27e-12	6.56e-09	1.46	4208	1074	650	243	[RFC4 - replication factor c (activator 1) 4, 37kda, HSF2 - heat shock transcription factor 2, CASZ1 - castor zinc finger 1, NCOA5 - nuclear receptor coactivator 5, AARS - alanyl-trna synthetase, PNN - pinin, desmosome associated protein, WHSC1L1 - wolf-hirschhorn syndrome candidate 1-like 1, PATZ1 - poz (btb) and at hook containing zinc finger 1, FBXO18 - f-box protein, helicase, 18, METTL14 - m…
GO:0051252	regulation of RNA metabolic process	8.32e-12	7.93e-09	1.43	4208	977	807	268	[ZMYND8 - zinc finger, mynd-type containing 8, HSF2 - heat shock transcription factor 2, CASZ1 - castor zinc finger 1, RFC1 - replication factor c (activator 1) 1, 145kda, TADA1 - transcriptional adaptor 1, NCOA5 - nuclear receptor coactivator 5, PNN - pinin, desmosome associated protein, WHSC1L1 - wolf-hirschhorn syndrome candidate 1-like 1, PATZ1 - poz (btb) and at hook containing zinc finger 1…
GO:0044446	intracellular organelle part	2.46e-11	8.58e-09	1.15	4208	2580	990	701	[ARAP1 - arfgap with rhogap domain, ankyrin repeat and ph domain 1, VEZT - vezatin, adherens junctions transmembrane protein, SPTAN1 - spectrin, alpha, non-erythrocytic 1, EXOSC10 - exosome component 10, GGCX - gamma-glutamyl carboxylase, TADA1 - transcriptional adaptor 1, PNN - pinin, desmosome associated protein, FBXO18 - f-box protein, helicase, 18, PATZ1 - poz (btb) and at hook containing zin…
GO:0006139	nucleobase-containing compound metabolic process	1.13e-11	9.86e-09	1.34	4208	1134	981	354	[CCNK - cyclin k, ZMYND8 - zinc finger, mynd-type containing 8, RFC4 - replication factor c (activator 1) 4, 37kda, TSN - translin, HSF2 - heat shock transcription factor 2, EXOSC10 - exosome component 10, CASZ1 - castor zinc finger 1, RFC1 - replication factor c (activator 1) 1, 145kda, TADA1 - transcriptional adaptor 1, NCOA5 - nuclear receptor coactivator 5, AARS - alanyl-trna synthetase, DHX3…
GO:1902494	catalytic complex	2.34e-11	1.09e-08	1.67	4208	478	797	151	[PSMD6 - proteasome (prosome, macropain) 26s subunit, non-atpase, 6, SEL1L - sel-1 suppressor of lin-12-like (c. elegans), DHX8 - deah (asp-glu-ala-his) box polypeptide 8, KLHL2 - kelch-like family member 2, TADA1 - transcriptional adaptor 1, KBTBD2 - kelch repeat and btb (poz) domain containing 2, DDOST - dolichyl-diphosphooligosaccharide--protein glycosyltransferase subunit (non-catalytic), PPP…
GO:0003723	RNA binding	7.87e-12	1.09e-08	1.56	4208	523	972	189	[DHX9 - deah (asp-glu-ala-his) box helicase 9, DHX8 - deah (asp-glu-ala-his) box polypeptide 8, APEH - acylaminoacyl-peptide hydrolase, DHX36 - deah (asp-glu-ala-his) box polypeptide 36, MARK2 - map/microtubule affinity-regulating kinase 2, PNISR - pnn-interacting serine/arginine-rich protein, DDX6 - dead (asp-glu-ala-asp) box helicase 6, TSN - translin, EXOSC10 - exosome component 10, NCOA5 - nu…
GO:0080090	regulation of primary metabolic process	2.05e-11	1.65e-08	1.39	4208	1538	539	273	[RFC4 - replication factor c (activator 1) 4, 37kda, MARK2 - map/microtubule affinity-regulating kinase 2, HSF2 - heat shock transcription factor 2, CASZ1 - castor zinc finger 1, NCOA5 - nuclear receptor coactivator 5, AARS - alanyl-trna synthetase, PATZ1 - poz (btb) and at hook containing zinc finger 1, FBXO18 - f-box protein, helicase, 18, WHSC1L1 - wolf-hirschhorn syndrome candidate 1-like 1, …
GO:0044451	nucleoplasm part	7.24e-11	2.02e-08	2.69	4208	378	219	53	[DHX8 - deah (asp-glu-ala-his) box polypeptide 8, PNISR - pnn-interacting serine/arginine-rich protein, CHD6 - chromodomain helicase dna binding protein 6, EPC2 - enhancer of polycomb homolog 2 (drosophila), EHMT1 - euchromatic histone-lysine n-methyltransferase 1, USF1 - upstream transcription factor 1, SUPT6H - suppressor of ty 6 homolog (s. cerevisiae), FLI1 - fli-1 proto-oncogene, ets transcr…
GO:0032991	macromolecular complex	3.47e-10	8.08e-08	1.37	4208	1463	558	266	[RFC4 - replication factor c (activator 1) 4, 37kda, SACM1L - sac1 suppressor of actin mutations 1-like (yeast), AAMP - angio-associated, migratory cell protein, DHX30 - deah (asp-glu-ala-his) box helicase 30, FBXO18 - f-box protein, helicase, 18, METTL14 - methyltransferase like 14, CORO1C - coronin, actin binding protein, 1c, SCAP - srebf chaperone, NRP1 - neuropilin 1, RABGAP1 - rab gtpase act…
GO:0031326	regulation of cellular biosynthetic process	1.2e-10	8.97e-08	1.48	4208	1118	525	207	[RFC4 - replication factor c (activator 1) 4, 37kda, HSF2 - heat shock transcription factor 2, CASZ1 - castor zinc finger 1, NCOA5 - nuclear receptor coactivator 5, AARS - alanyl-trna synthetase, WHSC1L1 - wolf-hirschhorn syndrome candidate 1-like 1, FBXO18 - f-box protein, helicase, 18, PATZ1 - poz (btb) and at hook containing zinc finger 1, METTL14 - methyltransferase like 14, ELK3 - elk3, ets-…
GO:0009889	regulation of biosynthetic process	1.3e-10	9.08e-08	1.48	4208	1140	525	210	[RFC4 - replication factor c (activator 1) 4, 37kda, HSF2 - heat shock transcription factor 2, CASZ1 - castor zinc finger 1, NCOA5 - nuclear receptor coactivator 5, AARS - alanyl-trna synthetase, WHSC1L1 - wolf-hirschhorn syndrome candidate 1-like 1, FBXO18 - f-box protein, helicase, 18, PATZ1 - poz (btb) and at hook containing zinc finger 1, METTL14 - methyltransferase like 14, ELK3 - elk3, ets-…
GO:0019222	regulation of metabolic process	2.52e-10	1.56e-07	1.34	4208	1694	539	290	[RFC4 - replication factor c (activator 1) 4, 37kda, MARK2 - map/microtubule affinity-regulating kinase 2, HSF2 - heat shock transcription factor 2, CASZ1 - castor zinc finger 1, NCOA5 - nuclear receptor coactivator 5, AARS - alanyl-trna synthetase, PATZ1 - poz (btb) and at hook containing zinc finger 1, FBXO18 - f-box protein, helicase, 18, WHSC1L1 - wolf-hirschhorn syndrome candidate 1-like 1, …
GO:0032774	RNA biosynthetic process	2.41e-10	1.58e-07	1.46	4208	651	986	222	[ZMYND8 - zinc finger, mynd-type containing 8, CCNK - cyclin k, HSF2 - heat shock transcription factor 2, CASZ1 - castor zinc finger 1, TADA1 - transcriptional adaptor 1, RFC1 - replication factor c (activator 1) 1, 145kda, NCOA5 - nuclear receptor coactivator 5, PNN - pinin, desmosome associated protein, PATZ1 - poz (btb) and at hook containing zinc finger 1, CEBPZ - ccaat/enhancer binding prote…
GO:0031323	regulation of cellular metabolic process	4.21e-10	2.1e-07	1.35	4208	1588	539	275	[RFC4 - replication factor c (activator 1) 4, 37kda, MARK2 - map/microtubule affinity-regulating kinase 2, HSF2 - heat shock transcription factor 2, CASZ1 - castor zinc finger 1, NCOA5 - nuclear receptor coactivator 5, AARS - alanyl-trna synthetase, FBXO18 - f-box protein, helicase, 18, PATZ1 - poz (btb) and at hook containing zinc finger 1, WHSC1L1 - wolf-hirschhorn syndrome candidate 1-like 1, …
GO:0097659	nucleic acid-templated transcription	4.13e-10	2.17e-07	1.48	4208	575	986	200	[CCNK - cyclin k, ZMYND8 - zinc finger, mynd-type containing 8, HSF2 - heat shock transcription factor 2, CASZ1 - castor zinc finger 1, TADA1 - transcriptional adaptor 1, RFC1 - replication factor c (activator 1) 1, 145kda, NCOA5 - nuclear receptor coactivator 5, PNN - pinin, desmosome associated protein, PATZ1 - poz (btb) and at hook containing zinc finger 1, CEBPZ - ccaat/enhancer binding prote…
GO:0006355	regulation of transcription, DNA-templated	3.83e-10	2.23e-07	1.36	4208	906	999	293	[CCNK - cyclin k, ZMYND8 - zinc finger, mynd-type containing 8, HSF2 - heat shock transcription factor 2, CASZ1 - castor zinc finger 1, RFC1 - replication factor c (activator 1) 1, 145kda, TADA1 - transcriptional adaptor 1, NCOA5 - nuclear receptor coactivator 5, PNN - pinin, desmosome associated protein, CEBPZ - ccaat/enhancer binding protein (c/ebp), zeta, WHSC1L1 - wolf-hirschhorn syndrome can…
GO:0006351	transcription, DNA-templated	4.13e-10	2.28e-07	1.48	4208	575	986	200	[CCNK - cyclin k, ZMYND8 - zinc finger, mynd-type containing 8, HSF2 - heat shock transcription factor 2, CASZ1 - castor zinc finger 1, TADA1 - transcriptional adaptor 1, RFC1 - replication factor c (activator 1) 1, 145kda, NCOA5 - nuclear receptor coactivator 5, PNN - pinin, desmosome associated protein, PATZ1 - poz (btb) and at hook containing zinc finger 1, CEBPZ - ccaat/enhancer binding prote…
GO:0044422	organelle part	1.21e-09	2.41e-07	1.14	4208	2627	990	704	[ARAP1 - arfgap with rhogap domain, ankyrin repeat and ph domain 1, VEZT - vezatin, adherens junctions transmembrane protein, SPTAN1 - spectrin, alpha, non-erythrocytic 1, EXOSC10 - exosome component 10, GGCX - gamma-glutamyl carboxylase, TADA1 - transcriptional adaptor 1, PNN - pinin, desmosome associated protein, FBXO18 - f-box protein, helicase, 18, PATZ1 - poz (btb) and at hook containing zin…
GO:1903506	regulation of nucleic acid-templated transcription	6.96e-10	3.17e-07	1.35	4208	914	999	294	[CCNK - cyclin k, ZMYND8 - zinc finger, mynd-type containing 8, HSF2 - heat shock transcription factor 2, CASZ1 - castor zinc finger 1, RFC1 - replication factor c (activator 1) 1, 145kda, TADA1 - transcriptional adaptor 1, NCOA5 - nuclear receptor coactivator 5, PNN - pinin, desmosome associated protein, CEBPZ - ccaat/enhancer binding protein (c/ebp), zeta, WHSC1L1 - wolf-hirschhorn syndrome can…
GO:0046483	heterocycle metabolic process	6.87e-10	3.27e-07	1.3	4208	1175	998	362	[CCNK - cyclin k, ZMYND8 - zinc finger, mynd-type containing 8, RFC4 - replication factor c (activator 1) 4, 37kda, TSN - translin, HSF2 - heat shock transcription factor 2, EXOSC10 - exosome component 10, CASZ1 - castor zinc finger 1, RFC1 - replication factor c (activator 1) 1, 145kda, TADA1 - transcriptional adaptor 1, NCOA5 - nuclear receptor coactivator 5, AARS - alanyl-trna synthetase, DHX3…
GO:2001141	regulation of RNA biosynthetic process	8.18e-10	3.43e-07	1.35	4208	915	999	294	[CCNK - cyclin k, ZMYND8 - zinc finger, mynd-type containing 8, HSF2 - heat shock transcription factor 2, CASZ1 - castor zinc finger 1, RFC1 - replication factor c (activator 1) 1, 145kda, TADA1 - transcriptional adaptor 1, NCOA5 - nuclear receptor coactivator 5, PNN - pinin, desmosome associated protein, CEBPZ - ccaat/enhancer binding protein (c/ebp), zeta, WHSC1L1 - wolf-hirschhorn syndrome can…
GO:0006725	cellular aromatic compound metabolic process	8.04e-10	3.51e-07	1.3	4208	1172	998	361	[CCNK - cyclin k, ZMYND8 - zinc finger, mynd-type containing 8, RFC4 - replication factor c (activator 1) 4, 37kda, TSN - translin, HSF2 - heat shock transcription factor 2, EXOSC10 - exosome component 10, CASZ1 - castor zinc finger 1, RFC1 - replication factor c (activator 1) 1, 145kda, TADA1 - transcriptional adaptor 1, NCOA5 - nuclear receptor coactivator 5, AARS - alanyl-trna synthetase, DHX3…
GO:0006325	chromatin organization	2.2e-09	8.85e-07	3.25	4208	204	222	35	[RTF1 - rtf1, paf1/rna polymerase ii complex component, homolog (s. cerevisiae), BRPF1 - bromodomain and phd finger containing, 1, CHD6 - chromodomain helicase dna binding protein 6, VPRBP - vpr (hiv-1) binding protein, EPC2 - enhancer of polycomb homolog 2 (drosophila), EHMT1 - euchromatic histone-lysine n-methyltransferase 1, NSD1 - nuclear receptor binding set domain protein 1, SETDB1 - set do…
GO:0016569	covalent chromatin modification	2.48e-09	9.63e-07	1.92	4208	178	986	80	[ZMYND8 - zinc finger, mynd-type containing 8, CHD6 - chromodomain helicase dna binding protein 6, VPRBP - vpr (hiv-1) binding protein, EPC2 - enhancer of polycomb homolog 2 (drosophila), TADA1 - transcriptional adaptor 1, EHMT1 - euchromatic histone-lysine n-methyltransferase 1, NSD1 - nuclear receptor binding set domain protein 1, MCRS1 - microspherule protein 1, SETDB1 - set domain, bifurcated…
GO:1901360	organic cyclic compound metabolic process	6.08e-09	2.27e-06	1.27	4208	1231	998	372	[CCNK - cyclin k, ZMYND8 - zinc finger, mynd-type containing 8, RFC4 - replication factor c (activator 1) 4, 37kda, TSN - translin, HSF2 - heat shock transcription factor 2, EXOSC10 - exosome component 10, CASZ1 - castor zinc finger 1, RFC1 - replication factor c (activator 1) 1, 145kda, TADA1 - transcriptional adaptor 1, NCOA5 - nuclear receptor coactivator 5, AARS - alanyl-trna synthetase, DHX3…
GO:0044424	intracellular part	3.3e-08	5.76e-06	1.06	4208	3698	863	805	[ARAP1 - arfgap with rhogap domain, ankyrin repeat and ph domain 1, VEZT - vezatin, adherens junctions transmembrane protein, GGCX - gamma-glutamyl carboxylase, TADA1 - transcriptional adaptor 1, AAMP - angio-associated, migratory cell protein, AARS - alanyl-trna synthetase, PNN - pinin, desmosome associated protein, CPED1 - cadherin-like and pc-esterase domain containing 1, PODXL - podocalyxin-l…
GO:0034641	cellular nitrogen compound metabolic process	2.78e-08	1.01e-05	1.26	4208	1267	998	378	[CCNK - cyclin k, ZMYND8 - zinc finger, mynd-type containing 8, RFC4 - replication factor c (activator 1) 4, 37kda, TSN - translin, HSF2 - heat shock transcription factor 2, EXOSC10 - exosome component 10, CASZ1 - castor zinc finger 1, RFC1 - replication factor c (activator 1) 1, 145kda, TADA1 - transcriptional adaptor 1, NCOA5 - nuclear receptor coactivator 5, AARS - alanyl-trna synthetase, DHX3…
GO:0006396	RNA processing	3.06e-08	1.07e-05	1.74	4208	267	861	95	[HNRNPUL1 - heterogeneous nuclear ribonucleoprotein u-like 1, DHX9 - deah (asp-glu-ala-his) box helicase 9, DHX36 - deah (asp-glu-ala-his) box polypeptide 36, DHX8 - deah (asp-glu-ala-his) box polypeptide 8, INTS9 - integrator complex subunit 9, NOP2 - nop2 nucleolar protein, TSN - translin, PRPF3 - pre-mrna processing factor 3, AARS - alanyl-trna synthetase, PPP1R9B - protein phosphatase 1, regu…
GO:0034654	nucleobase-containing compound biosynthetic process	4.08e-08	1.38e-05	1.37	4208	739	986	237	[ZMYND8 - zinc finger, mynd-type containing 8, CCNK - cyclin k, RFC4 - replication factor c (activator 1) 4, 37kda, HSF2 - heat shock transcription factor 2, CASZ1 - castor zinc finger 1, TADA1 - transcriptional adaptor 1, RFC1 - replication factor c (activator 1) 1, 145kda, NCOA5 - nuclear receptor coactivator 5, PNN - pinin, desmosome associated protein, PATZ1 - poz (btb) and at hook containing…
GO:0010628	positive regulation of gene expression	4.9e-08	1.6e-05	1.62	4208	518	617	123	[DHX9 - deah (asp-glu-ala-his) box helicase 9, DHX36 - deah (asp-glu-ala-his) box polypeptide 36, HSF2 - heat shock transcription factor 2, CASZ1 - castor zinc finger 1, INPP5K - inositol polyphosphate-5-phosphatase k, SIN3A - sin3 transcription regulator family member a, PATZ1 - poz (btb) and at hook containing zinc finger 1, FAM98A - family with sequence similarity 98, member a, ELK3 - elk3, et…
GO:0034645	cellular macromolecule biosynthetic process	6.06e-08	1.92e-05	1.37	4208	712	986	229	[ZMYND8 - zinc finger, mynd-type containing 8, CCNK - cyclin k, RFC4 - replication factor c (activator 1) 4, 37kda, HSF2 - heat shock transcription factor 2, CASZ1 - castor zinc finger 1, TADA1 - transcriptional adaptor 1, RFC1 - replication factor c (activator 1) 1, 145kda, NCOA5 - nuclear receptor coactivator 5, PNN - pinin, desmosome associated protein, PATZ1 - poz (btb) and at hook containing…
GO:0044427	chromosomal part	1.37e-07	2.12e-05	2.08	4208	240	498	59	[DHX9 - deah (asp-glu-ala-his) box helicase 9, DHX36 - deah (asp-glu-ala-his) box polypeptide 36, RFC4 - replication factor c (activator 1) 4, 37kda, CAPN2 - calpain 2, (m/ii) large subunit, MCRS1 - microspherule protein 1, USF1 - upstream transcription factor 1, FBXO18 - f-box protein, helicase, 18, SIN3A - sin3 transcription regulator family member a, XPO1 - exportin 1 (crm1 homolog, yeast), SM…
GO:0051254	positive regulation of RNA metabolic process	7.46e-08	2.23e-05	1.66	4208	456	617	111	[DHX9 - deah (asp-glu-ala-his) box helicase 9, DHX36 - deah (asp-glu-ala-his) box polypeptide 36, HSF2 - heat shock transcription factor 2, CASZ1 - castor zinc finger 1, INPP5K - inositol polyphosphate-5-phosphatase k, SIN3A - sin3 transcription regulator family member a, PATZ1 - poz (btb) and at hook containing zinc finger 1, METTL14 - methyltransferase like 14, ELK3 - elk3, ets-domain protein (…
GO:0006357	regulation of transcription from RNA polymerase II promoter	7.33e-08	2.26e-05	1.43	4208	562	986	188	[PSMD6 - proteasome (prosome, macropain) 26s subunit, non-atpase, 6, DHX9 - deah (asp-glu-ala-his) box helicase 9, ZMYND8 - zinc finger, mynd-type containing 8, CCNK - cyclin k, DHX36 - deah (asp-glu-ala-his) box polypeptide 36, HSF2 - heat shock transcription factor 2, TADA1 - transcriptional adaptor 1, RFC1 - replication factor c (activator 1) 1, 145kda, HTRA1 - htra serine peptidase 1, HEXIM1 …
GO:1990234	transferase complex	2.84e-07	3.96e-05	1.72	4208	281	776	89	[SEL1L - sel-1 suppressor of lin-12-like (c. elegans), PGGT1B - protein geranylgeranyltransferase type i, beta subunit, CHD6 - chromodomain helicase dna binding protein 6, KLHL2 - kelch-like family member 2, EPC2 - enhancer of polycomb homolog 2 (drosophila), TADA1 - transcriptional adaptor 1, MCRS1 - microspherule protein 1, DDOST - dolichyl-diphosphooligosaccharide--protein glycosyltransferase …
GO:0018205	peptidyl-lysine modification	1.84e-07	5.36e-05	2.29	4208	101	800	44	[NUP188 - nucleoporin 188kda, RTF1 - rtf1, paf1/rna polymerase ii complex component, homolog (s. cerevisiae), BRPF1 - bromodomain and phd finger containing, 1, EPC2 - enhancer of polycomb homolog 2 (drosophila), TADA1 - transcriptional adaptor 1, EHMT1 - euchromatic histone-lysine n-methyltransferase 1, MCRS1 - microspherule protein 1, NSD1 - nuclear receptor binding set domain protein 1, SETDB1 …
GO:0016071	mRNA metabolic process	1.95e-07	5.51e-05	2.11	4208	205	534	55	[DHX9 - deah (asp-glu-ala-his) box helicase 9, HNRNPUL1 - heterogeneous nuclear ribonucleoprotein u-like 1, DHX8 - deah (asp-glu-ala-his) box polypeptide 8, PRPF3 - pre-mrna processing factor 3, ZCCHC6 - zinc finger, cchc domain containing 6, PRPF6 - pre-mrna processing factor 6, METTL14 - methyltransferase like 14, SUPT6H - suppressor of ty 6 homolog (s. cerevisiae), RBM20 - rna binding motif pr…
GO:0019438	aromatic compound biosynthetic process	2.43e-07	6.69e-05	1.34	4208	758	998	241	[ZMYND8 - zinc finger, mynd-type containing 8, CCNK - cyclin k, RFC4 - replication factor c (activator 1) 4, 37kda, HSF2 - heat shock transcription factor 2, CASZ1 - castor zinc finger 1, TADA1 - transcriptional adaptor 1, RFC1 - replication factor c (activator 1) 1, 145kda, NCOA5 - nuclear receptor coactivator 5, PNN - pinin, desmosome associated protein, PATZ1 - poz (btb) and at hook containing…
GO:0005634	nucleus	5.32e-07	6.75e-05	1.24	4208	1272	990	370	[TRIM65 - tripartite motif containing 65, CCNK - cyclin k, ZMYND8 - zinc finger, mynd-type containing 8, RFC4 - replication factor c (activator 1) 4, 37kda, DNAJB2 - dnaj (hsp40) homolog, subfamily b, member 2, TSN - translin, EXOSC10 - exosome component 10, RFC1 - replication factor c (activator 1) 1, 145kda, TADA1 - transcriptional adaptor 1, NCOA5 - nuclear receptor coactivator 5, ANKRD11 - an…
GO:1901363	heterocyclic compound binding	8.19e-08	7.55e-05	1.22	4208	1519	991	436	[ZMYND8 - zinc finger, mynd-type containing 8, EXOSC10 - exosome component 10, NCOA5 - nuclear receptor coactivator 5, AARS - alanyl-trna synthetase, PNN - pinin, desmosome associated protein, PATZ1 - poz (btb) and at hook containing zinc finger 1, FBXO18 - f-box protein, helicase, 18, METTL14 - methyltransferase like 14, SPG7 - spastic paraplegia 7 (pure and complicated autosomal recessive), ZNF…
GO:0003677	DNA binding	1.55e-07	8.58e-05	1.43	4208	520	999	177	[DHX9 - deah (asp-glu-ala-his) box helicase 9, ZMYND8 - zinc finger, mynd-type containing 8, DHX36 - deah (asp-glu-ala-his) box polypeptide 36, RFC4 - replication factor c (activator 1) 4, 37kda, TSN - translin, HSF2 - heat shock transcription factor 2, CASZ1 - castor zinc finger 1, RFC1 - replication factor c (activator 1) 1, 145kda, SETDB1 - set domain, bifurcated 1, APLP2 - amyloid beta (a4) p…
GO:0006397	mRNA processing	3.23e-07	8.68e-05	2.3	4208	148	569	46	[SCAF8 - sr-related ctd-associated factor 8, DHX9 - deah (asp-glu-ala-his) box helicase 9, HNRNPUL1 - heterogeneous nuclear ribonucleoprotein u-like 1, DHX8 - deah (asp-glu-ala-his) box polypeptide 8, RBPMS - rna binding protein with multiple splicing, SPEN - spen homolog, transcriptional regulator (drosophila), PAPD4 - pap associated domain containing 4, PRPF3 - pre-mrna processing factor 3, MET…
GO:0006807	nitrogen compound metabolic process	3.42e-07	8.96e-05	1.18	4208	2172	763	464	[ZMYND8 - zinc finger, mynd-type containing 8, SPTAN1 - spectrin, alpha, non-erythrocytic 1, NCOA5 - nuclear receptor coactivator 5, AARS - alanyl-trna synthetase, PNN - pinin, desmosome associated protein, FBXO18 - f-box protein, helicase, 18, PATZ1 - poz (btb) and at hook containing zinc finger 1, METTL14 - methyltransferase like 14, SPG7 - spastic paraplegia 7 (pure and complicated autosomal r…
GO:0097159	organic cyclic compound binding	1.51e-07	0.000104	1.21	4208	1537	991	439	[ZMYND8 - zinc finger, mynd-type containing 8, EXOSC10 - exosome component 10, NCOA5 - nuclear receptor coactivator 5, AARS - alanyl-trna synthetase, PNN - pinin, desmosome associated protein, PATZ1 - poz (btb) and at hook containing zinc finger 1, FBXO18 - f-box protein, helicase, 18, METTL14 - methyltransferase like 14, SPG7 - spastic paraplegia 7 (pure and complicated autosomal recessive), ZNF…
GO:1903508	positive regulation of nucleic acid-templated transcription	4.21e-07	0.000105	1.65	4208	426	617	103	[DHX9 - deah (asp-glu-ala-his) box helicase 9, DHX36 - deah (asp-glu-ala-his) box polypeptide 36, HSF2 - heat shock transcription factor 2, CASZ1 - castor zinc finger 1, INPP5K - inositol polyphosphate-5-phosphatase k, SIN3A - sin3 transcription regulator family member a, PATZ1 - poz (btb) and at hook containing zinc finger 1, ELK3 - elk3, ets-domain protein (srf accessory protein 2), SCAP - sreb…
GO:0045893	positive regulation of transcription, DNA-templated	4.21e-07	0.000107	1.65	4208	426	617	103	[DHX9 - deah (asp-glu-ala-his) box helicase 9, DHX36 - deah (asp-glu-ala-his) box polypeptide 36, HSF2 - heat shock transcription factor 2, CASZ1 - castor zinc finger 1, INPP5K - inositol polyphosphate-5-phosphatase k, SIN3A - sin3 transcription regulator family member a, PATZ1 - poz (btb) and at hook containing zinc finger 1, ELK3 - elk3, ets-domain protein (srf accessory protein 2), SCAP - sreb…
GO:1902680	positive regulation of RNA biosynthetic process	4.91e-07	0.000117	1.65	4208	427	617	103	[DHX9 - deah (asp-glu-ala-his) box helicase 9, DHX36 - deah (asp-glu-ala-his) box polypeptide 36, HSF2 - heat shock transcription factor 2, CASZ1 - castor zinc finger 1, INPP5K - inositol polyphosphate-5-phosphatase k, SIN3A - sin3 transcription regulator family member a, PATZ1 - poz (btb) and at hook containing zinc finger 1, ELK3 - elk3, ets-domain protein (srf accessory protein 2), SCAP - sreb…
GO:0018130	heterocycle biosynthetic process	4.79e-07	0.000117	1.33	4208	763	993	240	[ZMYND8 - zinc finger, mynd-type containing 8, CCNK - cyclin k, RFC4 - replication factor c (activator 1) 4, 37kda, HSF2 - heat shock transcription factor 2, CASZ1 - castor zinc finger 1, TADA1 - transcriptional adaptor 1, RFC1 - replication factor c (activator 1) 1, 145kda, NCOA5 - nuclear receptor coactivator 5, PNN - pinin, desmosome associated protein, PATZ1 - poz (btb) and at hook containing…
GO:0009059	macromolecule biosynthetic process	5.13e-07	0.000119	1.32	4208	815	981	251	[CCNK - cyclin k, ZMYND8 - zinc finger, mynd-type containing 8, RFC4 - replication factor c (activator 1) 4, 37kda, HSF2 - heat shock transcription factor 2, CASZ1 - castor zinc finger 1, RFC1 - replication factor c (activator 1) 1, 145kda, TADA1 - transcriptional adaptor 1, NCOA5 - nuclear receptor coactivator 5, PNN - pinin, desmosome associated protein, WHSC1L1 - wolf-hirschhorn syndrome candi…
GO:0016570	histone modification	6.69e-07	0.000152	3.43	4208	138	222	25	[BRPF1 - bromodomain and phd finger containing, 1, RTF1 - rtf1, paf1/rna polymerase ii complex component, homolog (s. cerevisiae), VPRBP - vpr (hiv-1) binding protein, EPC2 - enhancer of polycomb homolog 2 (drosophila), EHMT1 - euchromatic histone-lysine n-methyltransferase 1, NSD1 - nuclear receptor binding set domain protein 1, SETDB1 - set domain, bifurcated 1, CTR9 - ctr9, paf1/rna polymerase…
GO:0008380	RNA splicing	1.12e-06	0.000244	2.37	4208	125	569	40	[SCAF8 - sr-related ctd-associated factor 8, DHX9 - deah (asp-glu-ala-his) box helicase 9, HNRNPUL1 - heterogeneous nuclear ribonucleoprotein u-like 1, DHX8 - deah (asp-glu-ala-his) box polypeptide 8, RBPMS - rna binding protein with multiple splicing, SPEN - spen homolog, transcriptional regulator (drosophila), PRPF3 - pre-mrna processing factor 3, PPP1R9B - protein phosphatase 1, regulatory sub…
GO:0045935	positive regulation of nucleobase-containing compound metabolic process	1.1e-06	0.000246	1.6	4208	512	554	108	[DHX9 - deah (asp-glu-ala-his) box helicase 9, DHX36 - deah (asp-glu-ala-his) box polypeptide 36, RFC4 - replication factor c (activator 1) 4, 37kda, HSF2 - heat shock transcription factor 2, CASZ1 - castor zinc finger 1, SETDB1 - set domain, bifurcated 1, INPP5K - inositol polyphosphate-5-phosphatase k, PATZ1 - poz (btb) and at hook containing zinc finger 1, SIN3A - sin3 transcription regulator …
GO:0000398	mRNA splicing, via spliceosome	1.22e-06	0.000247	3.45	4208	87	322	23	[DHX9 - deah (asp-glu-ala-his) box helicase 9, DHX8 - deah (asp-glu-ala-his) box polypeptide 8, PCF11 - pcf11 cleavage and polyadenylation factor subunit, SPEN - spen homolog, transcriptional regulator (drosophila), PSPC1 - paraspeckle component 1, SRRT - serrate rna effector molecule homolog (arabidopsis), PRPF3 - pre-mrna processing factor 3, CDK13 - cyclin-dependent kinase 13, PLRG1 - pleiotro…
GO:0000377	RNA splicing, via transesterification reactions with bulged adenosine as nucleophile	1.22e-06	0.000252	3.45	4208	87	322	23	[DHX9 - deah (asp-glu-ala-his) box helicase 9, DHX8 - deah (asp-glu-ala-his) box polypeptide 8, PCF11 - pcf11 cleavage and polyadenylation factor subunit, SPEN - spen homolog, transcriptional regulator (drosophila), PSPC1 - paraspeckle component 1, SRRT - serrate rna effector molecule homolog (arabidopsis), PRPF3 - pre-mrna processing factor 3, CDK13 - cyclin-dependent kinase 13, PLRG1 - pleiotro…
GO:0010604	positive regulation of macromolecule metabolic process	1.19e-06	0.000254	1.4	4208	860	624	179	[PSMD6 - proteasome (prosome, macropain) 26s subunit, non-atpase, 6, ARAP1 - arfgap with rhogap domain, ankyrin repeat and ph domain 1, DHX9 - deah (asp-glu-ala-his) box helicase 9, DHX36 - deah (asp-glu-ala-his) box polypeptide 36, RFC4 - replication factor c (activator 1) 4, 37kda, MARK2 - map/microtubule affinity-regulating kinase 2, HSF2 - heat shock transcription factor 2, CASZ1 - castor zin…
GO:0043412	macromolecule modification	1.21e-06	0.000254	1.31	4208	1031	800	256	[ZMYND8 - zinc finger, mynd-type containing 8, SPTAN1 - spectrin, alpha, non-erythrocytic 1, MARK2 - map/microtubule affinity-regulating kinase 2, TADA1 - transcriptional adaptor 1, AARS - alanyl-trna synthetase, WHSC1L1 - wolf-hirschhorn syndrome candidate 1-like 1, FBXO18 - f-box protein, helicase, 18, METTL14 - methyltransferase like 14, EPAS1 - endothelial pas domain protein 1, GALNT10 - udp-…
GO:1901362	organic cyclic compound biosynthetic process	1.51e-06	0.000299	1.31	4208	791	993	245	[CCNK - cyclin k, ZMYND8 - zinc finger, mynd-type containing 8, RFC4 - replication factor c (activator 1) 4, 37kda, HSF2 - heat shock transcription factor 2, CASZ1 - castor zinc finger 1, RFC1 - replication factor c (activator 1) 1, 145kda, TADA1 - transcriptional adaptor 1, NCOA5 - nuclear receptor coactivator 5, PNN - pinin, desmosome associated protein, WHSC1L1 - wolf-hirschhorn syndrome candi…
GO:0043234	protein complex	2.81e-06	0.000327	1.5	4208	941	369	124	[DHX9 - deah (asp-glu-ala-his) box helicase 9, SEL1L - sel-1 suppressor of lin-12-like (c. elegans), CDH2 - cadherin 2, type 1, n-cadherin (neuronal), DENND5A - denn/madd domain containing 5a, METTL14 - methyltransferase like 14, FAM98A - family with sequence similarity 98, member a, CORO1C - coronin, actin binding protein, 1c, COPB2 - coatomer protein complex, subunit beta 2 (beta prime), SCAP -…
GO:0022402	cell cycle process	1.96e-06	0.000381	1.87	4208	293	499	65	[RFC4 - replication factor c (activator 1) 4, 37kda, FBXW7 - f-box and wd repeat domain containing 7, e3 ubiquitin protein ligase, PPP1R9B - protein phosphatase 1, regulatory subunit 9b, XPO1 - exportin 1 (crm1 homolog, yeast), SMC3 - structural maintenance of chromosomes 3, PDS5A - pds5, regulator of cohesion maintenance, homolog a (s. cerevisiae), ENSA - endosulfine alpha, SUN2 - sad1 and unc84…
GO:0051173	positive regulation of nitrogen compound metabolic process	2.03e-06	0.000386	1.44	4208	824	554	156	[DHX9 - deah (asp-glu-ala-his) box helicase 9, DHX36 - deah (asp-glu-ala-his) box polypeptide 36, RFC4 - replication factor c (activator 1) 4, 37kda, MARK2 - map/microtubule affinity-regulating kinase 2, HSF2 - heat shock transcription factor 2, CASZ1 - castor zinc finger 1, SETDB1 - set domain, bifurcated 1, FLT1 - fms-related tyrosine kinase 1, CDH2 - cadherin 2, type 1, n-cadherin (neuronal), …
GO:0000375	RNA splicing, via transesterification reactions	2.45e-06	0.000459	3.34	4208	90	322	23	[DHX9 - deah (asp-glu-ala-his) box helicase 9, DHX8 - deah (asp-glu-ala-his) box polypeptide 8, PCF11 - pcf11 cleavage and polyadenylation factor subunit, SPEN - spen homolog, transcriptional regulator (drosophila), PSPC1 - paraspeckle component 1, SRRT - serrate rna effector molecule homolog (arabidopsis), PRPF3 - pre-mrna processing factor 3, CDK13 - cyclin-dependent kinase 13, PLRG1 - pleiotro…
GO:0045934	negative regulation of nucleobase-containing compound metabolic process	2.5e-06	0.00046	1.68	4208	394	553	87	[DHX9 - deah (asp-glu-ala-his) box helicase 9, DHX36 - deah (asp-glu-ala-his) box polypeptide 36, VPRBP - vpr (hiv-1) binding protein, EHMT1 - euchromatic histone-lysine n-methyltransferase 1, NSD1 - nuclear receptor binding set domain protein 1, NRDE2 - nrde-2, necessary for rna interference, domain containing, N4BP2L2 - nedd4 binding protein 2-like 2, INPP5K - inositol polyphosphate-5-phosphata…
GO:0043414	macromolecule methylation	3.29e-06	0.000594	4.25	4208	66	255	17	[RTF1 - rtf1, paf1/rna polymerase ii complex component, homolog (s. cerevisiae), NOP2 - nop2 nucleolar protein, KMT2E - lysine (k)-specific methyltransferase 2e, EHMT1 - euchromatic histone-lysine n-methyltransferase 1, NSD1 - nuclear receptor binding set domain protein 1, SETDB1 - set domain, bifurcated 1, METTL14 - methyltransferase like 14, CTR9 - ctr9, paf1/rna polymerase ii complex component…
GO:0006888	ER to Golgi vesicle-mediated transport	3.6e-06	0.000639	2.28	4208	66	951	34	[ARFGAP3 - adp-ribosylation factor gtpase activating protein 3, SPTAN1 - spectrin, alpha, non-erythrocytic 1, COG3 - component of oligomeric golgi complex 3, NSF - n-ethylmaleimide-sensitive factor, TRAPPC11 - trafficking protein particle complex 11, SEC23IP - sec23 interacting protein, GOLGB1 - golgin b1, ERGIC1 - endoplasmic reticulum-golgi intermediate compartment (ergic) 1, GBF1 - golgi brefe…
GO:0031325	positive regulation of cellular metabolic process	3.8e-06	0.000664	1.41	4208	865	554	161	[DHX9 - deah (asp-glu-ala-his) box helicase 9, DHX36 - deah (asp-glu-ala-his) box polypeptide 36, RFC4 - replication factor c (activator 1) 4, 37kda, MARK2 - map/microtubule affinity-regulating kinase 2, HSF2 - heat shock transcription factor 2, CASZ1 - castor zinc finger 1, SETDB1 - set domain, bifurcated 1, FLT1 - fms-related tyrosine kinase 1, CDH2 - cadherin 2, type 1, n-cadherin (neuronal), …
GO:0016604	nuclear body	8.7e-06	0.000935	2.11	4208	244	359	44	[DHX9 - deah (asp-glu-ala-his) box helicase 9, HBP1 - hmg-box transcription factor 1, DHX8 - deah (asp-glu-ala-his) box polypeptide 8, PNISR - pnn-interacting serine/arginine-rich protein, SAP130 - sin3a-associated protein, 130kda, EHMT1 - euchromatic histone-lysine n-methyltransferase 1, PRPF3 - pre-mrna processing factor 3, LARS - leucyl-trna synthetase, MAML1 - mastermind-like 1 (drosophila), …
GO:0051253	negative regulation of RNA metabolic process	5.93e-06	0.001	1.56	4208	350	786	102	[DHX9 - deah (asp-glu-ala-his) box helicase 9, ZMYND8 - zinc finger, mynd-type containing 8, DHX36 - deah (asp-glu-ala-his) box polypeptide 36, RFC1 - replication factor c (activator 1) 1, 145kda, INPP5K - inositol polyphosphate-5-phosphatase k, SIN3A - sin3 transcription regulator family member a, HEXIM1 - hexamethylene bis-acetamide inducible 1, PATZ1 - poz (btb) and at hook containing zinc fin…
GO:0050794	regulation of cellular process	5.83e-06	0.001	1.15	4208	2482	683	462	[ARAP1 - arfgap with rhogap domain, ankyrin repeat and ph domain 1, SPTAN1 - spectrin, alpha, non-erythrocytic 1, NCOA5 - nuclear receptor coactivator 5, AAMP - angio-associated, migratory cell protein, AARS - alanyl-trna synthetase, PNN - pinin, desmosome associated protein, PATZ1 - poz (btb) and at hook containing zinc finger 1, FBXO18 - f-box protein, helicase, 18, METTL14 - methyltransferase …
GO:0009893	positive regulation of metabolic process	6.53e-06	0.00109	1.39	4208	925	554	169	[DHX9 - deah (asp-glu-ala-his) box helicase 9, DHX36 - deah (asp-glu-ala-his) box polypeptide 36, RFC4 - replication factor c (activator 1) 4, 37kda, MARK2 - map/microtubule affinity-regulating kinase 2, HSF2 - heat shock transcription factor 2, CASZ1 - castor zinc finger 1, SETDB1 - set domain, bifurcated 1, FLT1 - fms-related tyrosine kinase 1, CDH2 - cadherin 2, type 1, n-cadherin (neuronal), …
GO:0008213	protein alkylation	7.54e-06	0.0012	5.17	4208	46	230	13	[RTF1 - rtf1, paf1/rna polymerase ii complex component, homolog (s. cerevisiae), KMT2E - lysine (k)-specific methyltransferase 2e, EHMT1 - euchromatic histone-lysine n-methyltransferase 1, NSD1 - nuclear receptor binding set domain protein 1, SETDB1 - set domain, bifurcated 1, CTR9 - ctr9, paf1/rna polymerase ii complex component, FAM98A - family with sequence similarity 98, member a, SUV420H1 - …
GO:0006479	protein methylation	7.54e-06	0.00122	5.17	4208	46	230	13	[RTF1 - rtf1, paf1/rna polymerase ii complex component, homolog (s. cerevisiae), KMT2E - lysine (k)-specific methyltransferase 2e, EHMT1 - euchromatic histone-lysine n-methyltransferase 1, NSD1 - nuclear receptor binding set domain protein 1, SETDB1 - set domain, bifurcated 1, FAM98A - family with sequence similarity 98, member a, CTR9 - ctr9, paf1/rna polymerase ii complex component, SUV420H1 - …
GO:0016571	histone methylation	8.23e-06	0.00129	6.13	4208	34	222	11	[SUV420H1 - suppressor of variegation 4-20 homolog 1 (drosophila), RTF1 - rtf1, paf1/rna polymerase ii complex component, homolog (s. cerevisiae), KMT2E - lysine (k)-specific methyltransferase 2e, EZH1 - enhancer of zeste homolog 1 (drosophila), EHMT1 - euchromatic histone-lysine n-methyltransferase 1, PRDM4 - pr domain containing 4, NSD1 - nuclear receptor binding set domain protein 1, SETDB1 - …
GO:0050789	regulation of biological process	9.4e-06	0.00145	1.22	4208	2615	277	210	[NCOA5 - nuclear receptor coactivator 5, AAMP - angio-associated, migratory cell protein, FBXO18 - f-box protein, helicase, 18, METTL14 - methyltransferase like 14, CORO1C - coronin, actin binding protein, 1c, SCAP - srebf chaperone, NRP1 - neuropilin 1, RABGAP1 - rab gtpase activating protein 1, IQGAP1 - iq motif containing gtpase activating protein 1, LZTS2 - leucine zipper, putative tumor supp…
GO:0044237	cellular metabolic process	9.64e-06	0.00146	1.14	4208	2375	763	492	[ZMYND8 - zinc finger, mynd-type containing 8, SPTAN1 - spectrin, alpha, non-erythrocytic 1, NCOA5 - nuclear receptor coactivator 5, AARS - alanyl-trna synthetase, PNN - pinin, desmosome associated protein, PATZ1 - poz (btb) and at hook containing zinc finger 1, FBXO18 - f-box protein, helicase, 18, METTL14 - methyltransferase like 14, GALNT10 - udp-n-acetyl-alpha-d-galactosamine:polypeptide n-ac…
GO:0010557	positive regulation of macromolecule biosynthetic process	1.07e-05	0.0016	1.53	4208	481	624	109	[DHX9 - deah (asp-glu-ala-his) box helicase 9, DHX36 - deah (asp-glu-ala-his) box polypeptide 36, RFC4 - replication factor c (activator 1) 4, 37kda, HSF2 - heat shock transcription factor 2, CASZ1 - castor zinc finger 1, INPP5K - inositol polyphosphate-5-phosphatase k, SIN3A - sin3 transcription regulator family member a, PATZ1 - poz (btb) and at hook containing zinc finger 1, ELK3 - elk3, ets-d…
GO:0036211	protein modification process	1.1e-05	0.0016	1.3	4208	954	800	235	[ZMYND8 - zinc finger, mynd-type containing 8, SPTAN1 - spectrin, alpha, non-erythrocytic 1, MARK2 - map/microtubule affinity-regulating kinase 2, TADA1 - transcriptional adaptor 1, WHSC1L1 - wolf-hirschhorn syndrome candidate 1-like 1, FBXO18 - f-box protein, helicase, 18, GALNT10 - udp-n-acetyl-alpha-d-galactosamine:polypeptide n-acetylgalactosaminyltransferase 10 (galnac-t10), EPAS1 - endothel…
GO:0006464	cellular protein modification process	1.1e-05	0.00162	1.3	4208	954	800	235	[ZMYND8 - zinc finger, mynd-type containing 8, SPTAN1 - spectrin, alpha, non-erythrocytic 1, MARK2 - map/microtubule affinity-regulating kinase 2, TADA1 - transcriptional adaptor 1, WHSC1L1 - wolf-hirschhorn syndrome candidate 1-like 1, FBXO18 - f-box protein, helicase, 18, GALNT10 - udp-n-acetyl-alpha-d-galactosamine:polypeptide n-acetylgalactosaminyltransferase 10 (galnac-t10), EPAS1 - endothel…
GO:0010605	negative regulation of macromolecule metabolic process	1.23e-05	0.00177	1.46	4208	697	537	130	[DHX9 - deah (asp-glu-ala-his) box helicase 9, DHX36 - deah (asp-glu-ala-his) box polypeptide 36, APLP2 - amyloid beta (a4) precursor-like protein 2, TNRC6A - trinucleotide repeat containing 6a, INPP5K - inositol polyphosphate-5-phosphatase k, SIN3A - sin3 transcription regulator family member a, PATZ1 - poz (btb) and at hook containing zinc finger 1, FBXO18 - f-box protein, helicase, 18, ZCCHC6 …
GO:0044238	primary metabolic process	1.49e-05	0.00208	1.14	4208	2313	763	480	[ZMYND8 - zinc finger, mynd-type containing 8, SPTAN1 - spectrin, alpha, non-erythrocytic 1, NCOA5 - nuclear receptor coactivator 5, AARS - alanyl-trna synthetase, PNN - pinin, desmosome associated protein, PATZ1 - poz (btb) and at hook containing zinc finger 1, FBXO18 - f-box protein, helicase, 18, METTL14 - methyltransferase like 14, SPG7 - spastic paraplegia 7 (pure and complicated autosomal r…
GO:0044271	cellular nitrogen compound biosynthetic process	1.73e-05	0.00238	1.28	4208	827	993	249	[CCNK - cyclin k, ZMYND8 - zinc finger, mynd-type containing 8, RFC4 - replication factor c (activator 1) 4, 37kda, HSF2 - heat shock transcription factor 2, CASZ1 - castor zinc finger 1, RFC1 - replication factor c (activator 1) 1, 145kda, TADA1 - transcriptional adaptor 1, NCOA5 - nuclear receptor coactivator 5, PNN - pinin, desmosome associated protein, WHSC1L1 - wolf-hirschhorn syndrome candi…
GO:0009892	negative regulation of metabolic process	1.79e-05	0.00244	1.43	4208	763	537	139	[DHX9 - deah (asp-glu-ala-his) box helicase 9, DHX36 - deah (asp-glu-ala-his) box polypeptide 36, TNRC6A - trinucleotide repeat containing 6a, APLP2 - amyloid beta (a4) precursor-like protein 2, INPP5K - inositol polyphosphate-5-phosphatase k, SIN3A - sin3 transcription regulator family member a, FBXO18 - f-box protein, helicase, 18, PATZ1 - poz (btb) and at hook containing zinc finger 1, ZCCHC6 …
GO:0032259	methylation	1.83e-05	0.00245	3.79	4208	74	255	17	[RTF1 - rtf1, paf1/rna polymerase ii complex component, homolog (s. cerevisiae), NOP2 - nop2 nucleolar protein, KMT2E - lysine (k)-specific methyltransferase 2e, EHMT1 - euchromatic histone-lysine n-methyltransferase 1, NSD1 - nuclear receptor binding set domain protein 1, SETDB1 - set domain, bifurcated 1, METTL14 - methyltransferase like 14, CTR9 - ctr9, paf1/rna polymerase ii complex component…
GO:1903047	mitotic cell cycle process	2.05e-05	0.00272	1.85	4208	188	641	53	[PSMD6 - proteasome (prosome, macropain) 26s subunit, non-atpase, 6, PPP2R2D - protein phosphatase 2, regulatory subunit b, delta, SMC3 - structural maintenance of chromosomes 3, PDS5A - pds5, regulator of cohesion maintenance, homolog a (s. cerevisiae), ENSA - endosulfine alpha, SUN2 - sad1 and unc84 domain containing 2, CTDNEP1 - ctd nuclear envelope phosphatase 1, CHFR - checkpoint with forkhe…
GO:0005829	cytosol	3.08e-05	0.00307	1.18	4208	1522	961	410	[ARAP1 - arfgap with rhogap domain, ankyrin repeat and ph domain 1, VEZT - vezatin, adherens junctions transmembrane protein, SPTAN1 - spectrin, alpha, non-erythrocytic 1, EXOSC10 - exosome component 10, TADA1 - transcriptional adaptor 1, AAMP - angio-associated, migratory cell protein, AARS - alanyl-trna synthetase, RABGAP1 - rab gtpase activating protein 1, COX10 - cytochrome c oxidase assembly…
GO:0044267	cellular protein metabolic process	2.37e-05	0.00311	1.27	4208	1030	800	249	[ZMYND8 - zinc finger, mynd-type containing 8, SPTAN1 - spectrin, alpha, non-erythrocytic 1, MARK2 - map/microtubule affinity-regulating kinase 2, TADA1 - transcriptional adaptor 1, WHSC1L1 - wolf-hirschhorn syndrome candidate 1-like 1, FBXO18 - f-box protein, helicase, 18, GALNT10 - udp-n-acetyl-alpha-d-galactosamine:polypeptide n-acetylgalactosaminyltransferase 10 (galnac-t10), EPAS1 - endothel…
GO:0030529	intracellular ribonucleoprotein complex	3.87e-05	0.00338	2.76	4208	249	147	24	[DHX8 - deah (asp-glu-ala-his) box polypeptide 8, CNOT1 - ccr4-not transcription complex, subunit 1, UTP3 - utp3, small subunit (ssu) processome component, homolog (s. cerevisiae), AAMP - angio-associated, migratory cell protein, NAT10 - n-acetyltransferase 10 (gcn5-related), DHX30 - deah (asp-glu-ala-his) box helicase 30, SECISBP2 - secis binding protein 2, TRA2B - transformer 2 beta homolog (dr…
GO:0006366	transcription from RNA polymerase II promoter	2.63e-05	0.00341	1.87	4208	187	614	51	[INTS9 - integrator complex subunit 9, HSF2 - heat shock transcription factor 2, USF1 - upstream transcription factor 1, PATZ1 - poz (btb) and at hook containing zinc finger 1, ELK3 - elk3, ets-domain protein (srf accessory protein 2), SUPT6H - suppressor of ty 6 homolog (s. cerevisiae), FLI1 - fli-1 proto-oncogene, ets transcription factor, EPAS1 - endothelial pas domain protein 1, FOXJ3 - forkh…
GO:1990904	ribonucleoprotein complex	3.87e-05	0.0036	2.76	4208	249	147	24	[DHX8 - deah (asp-glu-ala-his) box polypeptide 8, CNOT1 - ccr4-not transcription complex, subunit 1, UTP3 - utp3, small subunit (ssu) processome component, homolog (s. cerevisiae), AAMP - angio-associated, migratory cell protein, NAT10 - n-acetyltransferase 10 (gcn5-related), DHX30 - deah (asp-glu-ala-his) box helicase 30, SECISBP2 - secis binding protein 2, TRA2B - transformer 2 beta homolog (dr…
GO:0010558	negative regulation of macromolecule biosynthetic process	2.96e-05	0.00373	1.61	4208	404	536	83	[PGGT1B - protein geranylgeranyltransferase type i, beta subunit, VPRBP - vpr (hiv-1) binding protein, EHMT1 - euchromatic histone-lysine n-methyltransferase 1, NSD1 - nuclear receptor binding set domain protein 1, TNRC6A - trinucleotide repeat containing 6a, NRDE2 - nrde-2, necessary for rna interference, domain containing, N4BP2L2 - nedd4 binding protein 2-like 2, INPP5K - inositol polyphosphat…
GO:0051276	chromosome organization	3.14e-05	0.00392	2.13	4208	104	702	37	[DHX9 - deah (asp-glu-ala-his) box helicase 9, CKAP5 - cytoskeleton associated protein 5, RFC4 - replication factor c (activator 1) 4, 37kda, NIPBL - nipped-b homolog (drosophila), RFC1 - replication factor c (activator 1) 1, 145kda, FBXW7 - f-box and wd repeat domain containing 7, e3 ubiquitin protein ligase, GPS1 - g protein pathway suppressor 1, FBXO18 - f-box protein, helicase, 18, XPO1 - exp…
GO:0005515	protein binding	9.96e-06	0.00394	1.11	4208	3051	635	510	[ARAP1 - arfgap with rhogap domain, ankyrin repeat and ph domain 1, VEZT - vezatin, adherens junctions transmembrane protein, SPTAN1 - spectrin, alpha, non-erythrocytic 1, NCOA5 - nuclear receptor coactivator 5, AAMP - angio-associated, migratory cell protein, FBXO18 - f-box protein, helicase, 18, METTL14 - methyltransferase like 14, CORO1C - coronin, actin binding protein, 1c, PODXL - podocalyxi…
GO:0003682	chromatin binding	9.08e-06	0.00419	1.76	4208	151	997	63	[ZMYND8 - zinc finger, mynd-type containing 8, DHX9 - deah (asp-glu-ala-his) box helicase 9, NCOA5 - nuclear receptor coactivator 5, NSD1 - nuclear receptor binding set domain protein 1, SETDB1 - set domain, bifurcated 1, DHX30 - deah (asp-glu-ala-his) box helicase 30, PATZ1 - poz (btb) and at hook containing zinc finger 1, SIN3A - sin3 transcription regulator family member a, ZMYND11 - zinc fing…
GO:0070647	protein modification by small protein conjugation or removal	3.71e-05	0.00457	1.52	4208	342	795	98	[PSMD6 - proteasome (prosome, macropain) 26s subunit, non-atpase, 6, KLHL2 - kelch-like family member 2, KBTBD2 - kelch repeat and btb (poz) domain containing 2, FBXO18 - f-box protein, helicase, 18, RBCK1 - ranbp-type and c3hc4-type zinc finger containing 1, DDB1 - damage-specific dna binding protein 1, 127kda, EPAS1 - endothelial pas domain protein 1, UBE3B - ubiquitin protein ligase e3b, MARCH…
GO:0010629	negative regulation of gene expression	4.21e-05	0.00513	1.56	4208	457	537	91	[VPRBP - vpr (hiv-1) binding protein, EHMT1 - euchromatic histone-lysine n-methyltransferase 1, NSD1 - nuclear receptor binding set domain protein 1, TNRC6A - trinucleotide repeat containing 6a, NRDE2 - nrde-2, necessary for rna interference, domain containing, N4BP2L2 - nedd4 binding protein 2-like 2, INPP5K - inositol polyphosphate-5-phosphatase k, SIN3A - sin3 transcription regulator family me…
GO:0051172	negative regulation of nitrogen compound metabolic process	4.35e-05	0.00524	1.46	4208	639	537	119	[DHX9 - deah (asp-glu-ala-his) box helicase 9, DHX36 - deah (asp-glu-ala-his) box polypeptide 36, APLP2 - amyloid beta (a4) precursor-like protein 2, TNRC6A - trinucleotide repeat containing 6a, INPP5K - inositol polyphosphate-5-phosphatase k, SIN3A - sin3 transcription regulator family member a, PATZ1 - poz (btb) and at hook containing zinc finger 1, FBXO18 - f-box protein, helicase, 18, METTL14…
GO:0031328	positive regulation of cellular biosynthetic process	4.48e-05	0.00533	1.51	4208	512	554	102	[DHX9 - deah (asp-glu-ala-his) box helicase 9, DHX36 - deah (asp-glu-ala-his) box polypeptide 36, RFC4 - replication factor c (activator 1) 4, 37kda, HSF2 - heat shock transcription factor 2, CASZ1 - castor zinc finger 1, INPP5K - inositol polyphosphate-5-phosphatase k, PATZ1 - poz (btb) and at hook containing zinc finger 1, SIN3A - sin3 transcription regulator family member a, ELK3 - elk3, ets-d…
GO:2000113	negative regulation of cellular macromolecule biosynthetic process	4.65e-05	0.00547	1.61	4208	390	536	80	[VPRBP - vpr (hiv-1) binding protein, EHMT1 - euchromatic histone-lysine n-methyltransferase 1, NSD1 - nuclear receptor binding set domain protein 1, TNRC6A - trinucleotide repeat containing 6a, NRDE2 - nrde-2, necessary for rna interference, domain containing, N4BP2L2 - nedd4 binding protein 2-like 2, INPP5K - inositol polyphosphate-5-phosphatase k, FBXW7 - f-box and wd repeat domain containing …
GO:0033044	regulation of chromosome organization	5.18e-05	0.00603	3.41	4208	100	222	18	[RTF1 - rtf1, paf1/rna polymerase ii complex component, homolog (s. cerevisiae), USP7 - ubiquitin specific peptidase 7 (herpes virus-associated), NIPBL - nipped-b homolog (drosophila), NSD1 - nuclear receptor binding set domain protein 1, NAT10 - n-acetyltransferase 10 (gcn5-related), SETDB1 - set domain, bifurcated 1, CCT4 - chaperonin containing tcp1, subunit 4 (delta), CTR9 - ctr9, paf1/rna po…
GO:0045944	positive regulation of transcription from RNA polymerase II promoter	5.86e-05	0.00675	1.44	4208	331	986	112	[CCNK - cyclin k, DHX9 - deah (asp-glu-ala-his) box helicase 9, DHX36 - deah (asp-glu-ala-his) box polypeptide 36, HSF2 - heat shock transcription factor 2, PATZ1 - poz (btb) and at hook containing zinc finger 1, CEBPZ - ccaat/enhancer binding protein (c/ebp), zeta, SIN3A - sin3 transcription regulator family member a, ELK3 - elk3, ets-domain protein (srf accessory protein 2), SCAP - srebf chaper…
GO:0065007	biological regulation	6.65e-05	0.00757	1.12	4208	2738	683	496	[ARAP1 - arfgap with rhogap domain, ankyrin repeat and ph domain 1, SPTAN1 - spectrin, alpha, non-erythrocytic 1, NCOA5 - nuclear receptor coactivator 5, AAMP - angio-associated, migratory cell protein, AARS - alanyl-trna synthetase, PNN - pinin, desmosome associated protein, PATZ1 - poz (btb) and at hook containing zinc finger 1, FBXO18 - f-box protein, helicase, 18, METTL14 - methyltransferase …
GO:0032446	protein modification by small protein conjugation	6.84e-05	0.00763	1.56	4208	278	795	82	[PSMD6 - proteasome (prosome, macropain) 26s subunit, non-atpase, 6, KLHL2 - kelch-like family member 2, VPRBP - vpr (hiv-1) binding protein, KBTBD2 - kelch repeat and btb (poz) domain containing 2, ZER1 - zyg-11 related, cell cycle regulator, FBXW7 - f-box and wd repeat domain containing 7, e3 ubiquitin protein ligase, TRIM63 - tripartite motif containing 63, e3 ubiquitin protein ligase, FBXO18 …
GO:0009891	positive regulation of biosynthetic process	6.77e-05	0.00763	1.5	4208	517	554	102	[DHX9 - deah (asp-glu-ala-his) box helicase 9, DHX36 - deah (asp-glu-ala-his) box polypeptide 36, RFC4 - replication factor c (activator 1) 4, 37kda, HSF2 - heat shock transcription factor 2, CASZ1 - castor zinc finger 1, INPP5K - inositol polyphosphate-5-phosphatase k, PATZ1 - poz (btb) and at hook containing zinc finger 1, SIN3A - sin3 transcription regulator family member a, ELK3 - elk3, ets-d…
GO:0048518	positive regulation of biological process	6.95e-05	0.00767	1.25	4208	1486	554	244	[RFC4 - replication factor c (activator 1) 4, 37kda, MARK2 - map/microtubule affinity-regulating kinase 2, HSF2 - heat shock transcription factor 2, CASZ1 - castor zinc finger 1, AAMP - angio-associated, migratory cell protein, FBXO18 - f-box protein, helicase, 18, PATZ1 - poz (btb) and at hook containing zinc finger 1, METTL14 - methyltransferase like 14, ELK3 - elk3, ets-domain protein (srf acc…
GO:0001650	fibrillar center	0.000106	0.00819	2.29	4208	49	936	25	[VPRBP - vpr (hiv-1) binding protein, NFIB - nuclear factor i/b, TOP1 - topoisomerase (dna) i, SUPT20H - suppressor of ty 20 homolog (s. cerevisiae), MLLT1 - myeloid/lymphoid or mixed-lineage leukemia (trithorax homolog, drosophila); translocated to, 1, BTBD10 - btb (poz) domain containing 10, NOP56 - nop56 ribonucleoprotein, CC2D1A - coiled-coil and c2 domain containing 1a, MTDH - metadherin, PE…
GO:0031060	regulation of histone methylation	7.69e-05	0.0083	2.94	4208	22	975	15	[PYGO2 - pygopus homolog 2 (drosophila), RTF1 - rtf1, paf1/rna polymerase ii complex component, homolog (s. cerevisiae), NSD1 - nuclear receptor binding set domain protein 1, PAXBP1 - pax3 and pax7 binding protein 1, ZNF335 - zinc finger protein 335, RNF20 - ring finger protein 20, e3 ubiquitin protein ligase, CTR9 - ctr9, paf1/rna polymerase ii complex component, KDM4A - lysine (k)-specific deme…
GO:0031324	negative regulation of cellular metabolic process	7.76e-05	0.0083	1.43	4208	687	537	125	[DHX9 - deah (asp-glu-ala-his) box helicase 9, DHX36 - deah (asp-glu-ala-his) box polypeptide 36, APLP2 - amyloid beta (a4) precursor-like protein 2, TNRC6A - trinucleotide repeat containing 6a, INPP5K - inositol polyphosphate-5-phosphatase k, SIN3A - sin3 transcription regulator family member a, PATZ1 - poz (btb) and at hook containing zinc finger 1, FBXO18 - f-box protein, helicase, 18, METTL14…
GO:1903312	negative regulation of mRNA metabolic process	8.11e-05	0.00859	4.2	4208	20	551	11	[HNRNPU - heterogeneous nuclear ribonucleoprotein u (scaffold attachment factor a), DHX9 - deah (asp-glu-ala-his) box helicase 9, RNF40 - ring finger protein 40, e3 ubiquitin protein ligase, SUPT5H - suppressor of ty 5 homolog (s. cerevisiae), DYRK1A - dual-specificity tyrosine-(y)-phosphorylation regulated kinase 1a, RBM42 - rna binding motif protein 42, SECISBP2 - secis binding protein 2, TRA2B…
GO:0044265	cellular macromolecule catabolic process	8.24e-05	0.00863	1.55	4208	268	818	81	[PSMD6 - proteasome (prosome, macropain) 26s subunit, non-atpase, 6, SEL1L - sel-1 suppressor of lin-12-like (c. elegans), FBXW7 - f-box and wd repeat domain containing 7, e3 ubiquitin protein ligase, FBXO18 - f-box protein, helicase, 18, ZCCHC6 - zinc finger, cchc domain containing 6, KCTD5 - potassium channel tetramerization domain containing 5, RBCK1 - ranbp-type and c3hc4-type zinc finger con…
GO:0051641	cellular localization	9.54e-05	0.00981	1.3	4208	631	979	191	[DHX9 - deah (asp-glu-ala-his) box helicase 9, SEL1L - sel-1 suppressor of lin-12-like (c. elegans), MARK2 - map/microtubule affinity-regulating kinase 2, SPTAN1 - spectrin, alpha, non-erythrocytic 1, EXOSC10 - exosome component 10, TOMM70A - translocase of outer mitochondrial membrane 70 homolog a (s. cerevisiae), CDH2 - cadherin 2, type 1, n-cadherin (neuronal), ERGIC1 - endoplasmic reticulum-g…
GO:0043229	intracellular organelle	0.000143	0.00999	1.1	4208	2579	979	658	[ZMYND8 - zinc finger, mynd-type containing 8, ARAP1 - arfgap with rhogap domain, ankyrin repeat and ph domain 1, VEZT - vezatin, adherens junctions transmembrane protein, SPTAN1 - spectrin, alpha, non-erythrocytic 1, EXOSC10 - exosome component 10, TADA1 - transcriptional adaptor 1, NCOA5 - nuclear receptor coactivator 5, AAMP - angio-associated, migratory cell protein, FBXO18 - f-box protein, h…
GO:0000785	chromatin	0.000138	0.0102	3.35	4208	124	172	17	[CHD4 - chromodomain helicase dna binding protein 4, NIPBL - nipped-b homolog (drosophila), CAPN2 - calpain 2, (m/ii) large subunit, USF1 - upstream transcription factor 1, CTR9 - ctr9, paf1/rna polymerase ii complex component, KIAA0947 - kiaa0947, DVL3 - dishevelled segment polarity protein 3, SUPT6H - suppressor of ty 6 homolog (s. cerevisiae), TOP2B - topoisomerase (dna) ii beta 180kda, MTA2 -…
GO:0009890	negative regulation of biosynthetic process	0.0001	0.0102	1.56	4208	429	536	85	[PGGT1B - protein geranylgeranyltransferase type i, beta subunit, VPRBP - vpr (hiv-1) binding protein, EHMT1 - euchromatic histone-lysine n-methyltransferase 1, NSD1 - nuclear receptor binding set domain protein 1, TNRC6A - trinucleotide repeat containing 6a, NRDE2 - nrde-2, necessary for rna interference, domain containing, N4BP2L2 - nedd4 binding protein 2-like 2, INPP5K - inositol polyphosphat…
GO:0018193	peptidyl-amino acid modification	0.000104	0.0105	1.54	4208	286	805	84	[MARK2 - map/microtubule affinity-regulating kinase 2, VPRBP - vpr (hiv-1) binding protein, EPC2 - enhancer of polycomb homolog 2 (drosophila), EHMT1 - euchromatic histone-lysine n-methyltransferase 1, TADA1 - transcriptional adaptor 1, GGCX - gamma-glutamyl carboxylase, NSD1 - nuclear receptor binding set domain protein 1, MCRS1 - microspherule protein 1, DDOST - dolichyl-diphosphooligosaccharid…
GO:0006886	intracellular protein transport	0.000107	0.0107	1.56	4208	246	844	77	[SEL1L - sel-1 suppressor of lin-12-like (c. elegans), COG3 - component of oligomeric golgi complex 3, GPN2 - gpn-loop gtpase 2, AP1G1 - adaptor-related protein complex 1, gamma 1 subunit, TOMM70A - translocase of outer mitochondrial membrane 70 homolog a (s. cerevisiae), GOLGA1 - golgin a1, LARS - leucyl-trna synthetase, XPO1 - exportin 1 (crm1 homolog, yeast), ATP1B1 - atpase, na+/k+ transporti…
GO:0046907	intracellular transport	0.000112	0.0109	1.39	4208	465	844	130	[SEL1L - sel-1 suppressor of lin-12-like (c. elegans), SPTAN1 - spectrin, alpha, non-erythrocytic 1, TOMM70A - translocase of outer mitochondrial membrane 70 homolog a (s. cerevisiae), DENND5A - denn/madd domain containing 5a, COPB2 - coatomer protein complex, subunit beta 2 (beta prime), RABGAP1 - rab gtpase activating protein 1, PTPN23 - protein tyrosine phosphatase, non-receptor type 23, SPG7 …
GO:0048193	Golgi vesicle transport	0.000131	0.0126	1.74	4208	132	951	52	[COG3 - component of oligomeric golgi complex 3, SPTAN1 - spectrin, alpha, non-erythrocytic 1, AP1G1 - adaptor-related protein complex 1, gamma 1 subunit, GOLGA1 - golgin a1, ERGIC1 - endoplasmic reticulum-golgi intermediate compartment (ergic) 1, GOLGB1 - golgin b1, COPB2 - coatomer protein complex, subunit beta 2 (beta prime), PDCD6 - programmed cell death 6, CYTH3 - cytohesin 3, WHAMM - was pr…
GO:0051649	establishment of localization in cell	0.000141	0.0134	1.37	4208	497	844	137	[SEL1L - sel-1 suppressor of lin-12-like (c. elegans), SPTAN1 - spectrin, alpha, non-erythrocytic 1, TOMM70A - translocase of outer mitochondrial membrane 70 homolog a (s. cerevisiae), DENND5A - denn/madd domain containing 5a, COPB2 - coatomer protein complex, subunit beta 2 (beta prime), RABGAP1 - rab gtpase activating protein 1, PTPN23 - protein tyrosine phosphatase, non-receptor type 23, SPG7 …
GO:0048522	positive regulation of cellular process	0.000148	0.0137	1.26	4208	1341	554	222	[RFC4 - replication factor c (activator 1) 4, 37kda, MARK2 - map/microtubule affinity-regulating kinase 2, HSF2 - heat shock transcription factor 2, CASZ1 - castor zinc finger 1, AAMP - angio-associated, migratory cell protein, PATZ1 - poz (btb) and at hook containing zinc finger 1, FBXO18 - f-box protein, helicase, 18, METTL14 - methyltransferase like 14, ELK3 - elk3, ets-domain protein (srf acc…
GO:0031327	negative regulation of cellular biosynthetic process	0.000148	0.0138	1.55	4208	420	536	83	[VPRBP - vpr (hiv-1) binding protein, EHMT1 - euchromatic histone-lysine n-methyltransferase 1, NSD1 - nuclear receptor binding set domain protein 1, TNRC6A - trinucleotide repeat containing 6a, NRDE2 - nrde-2, necessary for rna interference, domain containing, N4BP2L2 - nedd4 binding protein 2-like 2, INPP5K - inositol polyphosphate-5-phosphatase k, FBXW7 - f-box and wd repeat domain containing …
GO:0035770	ribonucleoprotein granule	0.000215	0.0143	5.11	4208	56	147	10	[HNRNPU - heterogeneous nuclear ribonucleoprotein u (scaffold attachment factor a), CNOT1 - ccr4-not transcription complex, subunit 1, IQGAP1 - iq motif containing gtpase activating protein 1, STAU1 - staufen double-stranded rna binding protein 1, TOP1 - topoisomerase (dna) i, CNOT2 - ccr4-not transcription complex, subunit 2, PUM1 - pumilio homolog 1 (drosophila), UPF1 - upf1 regulator of nonsen…
GO:0044464	cell part	0.000232	0.0147	1.04	4208	3890	600	578	[ARAP1 - arfgap with rhogap domain, ankyrin repeat and ph domain 1, VEZT - vezatin, adherens junctions transmembrane protein, SPTAN1 - spectrin, alpha, non-erythrocytic 1, AAMP - angio-associated, migratory cell protein, NCOA5 - nuclear receptor coactivator 5, AARS - alanyl-trna synthetase, FBXO18 - f-box protein, helicase, 18, PATZ1 - poz (btb) and at hook containing zinc finger 1, METTL14 - met…
GO:0016567	protein ubiquitination	0.000162	0.0149	1.56	4208	254	795	75	[PSMD6 - proteasome (prosome, macropain) 26s subunit, non-atpase, 6, KLHL2 - kelch-like family member 2, VPRBP - vpr (hiv-1) binding protein, KBTBD2 - kelch repeat and btb (poz) domain containing 2, ZER1 - zyg-11 related, cell cycle regulator, FBXW7 - f-box and wd repeat domain containing 7, e3 ubiquitin protein ligase, TRIM63 - tripartite motif containing 63, e3 ubiquitin protein ligase, FBXO18 …
GO:1903507	negative regulation of nucleic acid-templated transcription	0.000209	0.0189	1.49	4208	328	786	91	[ZMYND8 - zinc finger, mynd-type containing 8, VPRBP - vpr (hiv-1) binding protein, EHMT1 - euchromatic histone-lysine n-methyltransferase 1, RFC1 - replication factor c (activator 1) 1, 145kda, NSD1 - nuclear receptor binding set domain protein 1, STRN3 - striatin, calmodulin binding protein 3, N4BP2L2 - nedd4 binding protein 2-like 2, NRDE2 - nrde-2, necessary for rna interference, domain conta…
GO:1902679	negative regulation of RNA biosynthetic process	0.000209	0.019	1.49	4208	328	786	91	[ZMYND8 - zinc finger, mynd-type containing 8, VPRBP - vpr (hiv-1) binding protein, EHMT1 - euchromatic histone-lysine n-methyltransferase 1, RFC1 - replication factor c (activator 1) 1, 145kda, NSD1 - nuclear receptor binding set domain protein 1, STRN3 - striatin, calmodulin binding protein 3, NRDE2 - nrde-2, necessary for rna interference, domain containing, N4BP2L2 - nedd4 binding protein 2-l…
GO:0019899	enzyme binding	6.42e-05	0.0197	1.39	4208	645	683	145	[DHX36 - deah (asp-glu-ala-his) box polypeptide 36, RFC4 - replication factor c (activator 1) 4, 37kda, CDH2 - cadherin 2, type 1, n-cadherin (neuronal), DENND5A - denn/madd domain containing 5a, CORO1C - coronin, actin binding protein, 1c, ENSA - endosulfine alpha, RABGAP1 - rab gtpase activating protein 1, IQGAP1 - iq motif containing gtpase activating protein 1, PTPN23 - protein tyrosine phosp…
GO:0042623	ATPase activity, coupled	5.76e-05	0.0199	1.87	4208	99	998	44	[ATP8B2 - atpase, aminophospholipid transporter, class i, type 8b, member 2, DHX9 - deah (asp-glu-ala-his) box helicase 9, LONP1 - lon peptidase 1, mitochondrial, DHX8 - deah (asp-glu-ala-his) box polypeptide 8, DHX36 - deah (asp-glu-ala-his) box polypeptide 36, RFC4 - replication factor c (activator 1) 4, 37kda, CHD6 - chromodomain helicase dna binding protein 6, DDX6 - dead (asp-glu-ala-asp) bo…
GO:0051246	regulation of protein metabolic process	0.000239	0.0214	1.54	4208	755	285	79	[NSD1 - nuclear receptor binding set domain protein 1, TNRC6A - trinucleotide repeat containing 6a, LARS - leucyl-trna synthetase, APLP2 - amyloid beta (a4) precursor-like protein 2, CDH2 - cadherin 2, type 1, n-cadherin (neuronal), INPP5K - inositol polyphosphate-5-phosphatase k, FBXO18 - f-box protein, helicase, 18, METTL14 - methyltransferase like 14, CORO1C - coronin, actin binding protein, 1…
GO:0071704	organic substance metabolic process	0.000252	0.0224	1.14	4208	2424	554	365	[RFC4 - replication factor c (activator 1) 4, 37kda, MARK2 - map/microtubule affinity-regulating kinase 2, HSF2 - heat shock transcription factor 2, CASZ1 - castor zinc finger 1, NCOA5 - nuclear receptor coactivator 5, SACM1L - sac1 suppressor of actin mutations 1-like (yeast), AARS - alanyl-trna synthetase, DHX30 - deah (asp-glu-ala-his) box helicase 30, WHSC1L1 - wolf-hirschhorn syndrome candid…
GO:0007062	sister chromatid cohesion	0.000265	0.0234	2.88	4208	34	688	16	[CLASP2 - cytoplasmic linker associated protein 2, CKAP5 - cytoskeleton associated protein 5, DYNC1I2 - dynein, cytoplasmic 1, intermediate chain 2, DYNC1LI2 - dynein, cytoplasmic 1, light intermediate chain 2, NIPBL - nipped-b homolog (drosophila), STAG2 - stromal antigen 2, PPP2R1A - protein phosphatase 2, regulatory subunit a, alpha, FBXW7 - f-box and wd repeat domain containing 7, e3 ubiquiti…
GO:0032268	regulation of cellular protein metabolic process	0.000318	0.0278	1.56	4208	711	285	75	[NSD1 - nuclear receptor binding set domain protein 1, TNRC6A - trinucleotide repeat containing 6a, LARS - leucyl-trna synthetase, APLP2 - amyloid beta (a4) precursor-like protein 2, CDH2 - cadherin 2, type 1, n-cadherin (neuronal), INPP5K - inositol polyphosphate-5-phosphatase k, FBXO18 - f-box protein, helicase, 18, METTL14 - methyltransferase like 14, CORO1C - coronin, actin binding protein, 1…
GO:1903311	regulation of mRNA metabolic process	0.000327	0.0284	1.97	4208	89	815	34	[DHX9 - deah (asp-glu-ala-his) box helicase 9, PSMD6 - proteasome (prosome, macropain) 26s subunit, non-atpase, 6, PSMD11 - proteasome (prosome, macropain) 26s subunit, non-atpase, 11, CNOT1 - ccr4-not transcription complex, subunit 1, PSMD13 - proteasome (prosome, macropain) 26s subunit, non-atpase, 13, PNPT1 - polyribonucleotide nucleotidyltransferase 1, XPO1 - exportin 1 (crm1 homolog, yeast),…
GO:0006259	DNA metabolic process	0.000338	0.0291	2.31	4208	207	229	26	[VPRBP - vpr (hiv-1) binding protein, EPC2 - enhancer of polycomb homolog 2 (drosophila), EHMT1 - euchromatic histone-lysine n-methyltransferase 1, GPS1 - g protein pathway suppressor 1, TOP2B - topoisomerase (dna) ii beta 180kda, XRN2 - 5'-3' exoribonuclease 2, USP47 - ubiquitin specific peptidase 47, TOP1 - topoisomerase (dna) i, BOD1L1 - biorientation of chromosomes in cell division 1-like 1, …
GO:0005694	chromosome	0.000518	0.0315	2.64	4208	63	480	19	[RBM19 - rna binding motif protein 19, USP7 - ubiquitin specific peptidase 7 (herpes virus-associated), EHMT1 - euchromatic histone-lysine n-methyltransferase 1, NSD1 - nuclear receptor binding set domain protein 1, CDK13 - cyclin-dependent kinase 13, STAG2 - stromal antigen 2, SETDB1 - set domain, bifurcated 1, WHSC1L1 - wolf-hirschhorn syndrome candidate 1-like 1, SMC3 - structural maintenance …
GO:0045892	negative regulation of transcription, DNA-templated	0.000381	0.0325	1.48	4208	322	757	86	[ZMYND8 - zinc finger, mynd-type containing 8, VPRBP - vpr (hiv-1) binding protein, EHMT1 - euchromatic histone-lysine n-methyltransferase 1, RFC1 - replication factor c (activator 1) 1, 145kda, NSD1 - nuclear receptor binding set domain protein 1, STRN3 - striatin, calmodulin binding protein 3, NRDE2 - nrde-2, necessary for rna interference, domain containing, N4BP2L2 - nedd4 binding protein 2-l…
GO:0098781	ncRNA transcription	0.000399	0.0334	4.12	4208	40	281	11	[SNAPC2 - small nuclear rna activating complex, polypeptide 2, 45kda, SRRT - serrate rna effector molecule homolog (arabidopsis), CDK7 - cyclin-dependent kinase 7, SNAPC3 - small nuclear rna activating complex, polypeptide 3, 50kda, ZNF143 - zinc finger protein 143, SIRT7 - sirtuin 7, INTS8 - integrator complex subunit 8, RPRD1A - regulation of nuclear pre-mrna domain containing 1a, BRF1 - brf1, …
GO:0008152	metabolic process	0.000395	0.0334	1.13	4208	2564	527	364	[RFC4 - replication factor c (activator 1) 4, 37kda, MARK2 - map/microtubule affinity-regulating kinase 2, HSF2 - heat shock transcription factor 2, CASZ1 - castor zinc finger 1, NCOA5 - nuclear receptor coactivator 5, SACM1L - sac1 suppressor of actin mutations 1-like (yeast), AARS - alanyl-trna synthetase, DHX30 - deah (asp-glu-ala-his) box helicase 30, WHSC1L1 - wolf-hirschhorn syndrome candid…
GO:0071013	catalytic step 2 spliceosome	0.000648	0.0362	2.91	4208	29	698	14	[DHX8 - deah (asp-glu-ala-his) box polypeptide 8, NRDE2 - nrde-2, necessary for rna interference, domain containing, XAB2 - xpa binding protein 2, PNN - pinin, desmosome associated protein, PLRG1 - pleiotropic regulator 1, PRPF6 - pre-mrna processing factor 6, SKIV2L2 - superkiller viralicidic activity 2-like 2 (s. cerevisiae), HNRNPU - heterogeneous nuclear ribonucleoprotein u (scaffold attachme…
GO:0005488	binding	0.000132	0.0364	1.05	4208	3580	982	877	[ARAP1 - arfgap with rhogap domain, ankyrin repeat and ph domain 1, VEZT - vezatin, adherens junctions transmembrane protein, EXOSC10 - exosome component 10, AAMP - angio-associated, migratory cell protein, AARS - alanyl-trna synthetase, PNN - pinin, desmosome associated protein, PODXL - podocalyxin-like, GALNT10 - udp-n-acetyl-alpha-d-galactosamine:polypeptide n-acetylgalactosaminyltransferase 1…
GO:0031056	regulation of histone modification	0.000449	0.0374	2.16	4208	48	975	24	[PYGO2 - pygopus homolog 2 (drosophila), UBR5 - ubiquitin protein ligase e3 component n-recognin 5, RTF1 - rtf1, paf1/rna polymerase ii complex component, homolog (s. cerevisiae), VEGFA - vascular endothelial growth factor a, NIPBL - nipped-b homolog (drosophila), GATA2 - gata binding protein 2, NSD1 - nuclear receptor binding set domain protein 1, PAXBP1 - pax3 and pax7 binding protein 1, SIN3A …
GO:0038093	Fc receptor signaling pathway	0.000484	0.0399	2.45	4208	60	600	21	[PSMD6 - proteasome (prosome, macropain) 26s subunit, non-atpase, 6, PSMD11 - proteasome (prosome, macropain) 26s subunit, non-atpase, 11, NCKAP1 - nck-associated protein 1, PSMD13 - proteasome (prosome, macropain) 26s subunit, non-atpase, 13, SHC1 - shc (src homology 2 domain containing) transforming protein 1, PPP3CB - protein phosphatase 3, catalytic subunit, beta isozyme, PIK3R1 - phosphoinos…
GO:0008094	DNA-dependent ATPase activity	0.000163	0.0409	4.64	4208	24	378	10	[DHX9 - deah (asp-glu-ala-his) box helicase 9, DHX36 - deah (asp-glu-ala-his) box polypeptide 36, TOP2B - topoisomerase (dna) ii beta 180kda, CHD4 - chromodomain helicase dna binding protein 4, RFC4 - replication factor c (activator 1) 4, 37kda, CHD6 - chromodomain helicase dna binding protein 6, CDK7 - cyclin-dependent kinase 7, FBXO18 - f-box protein, helicase, 18, SMARCA2 - swi/snf related, ma…
GO:0016887	ATPase activity	0.000184	0.0425	1.9	4208	130	717	42	[ATP8B2 - atpase, aminophospholipid transporter, class i, type 8b, member 2, DHX9 - deah (asp-glu-ala-his) box helicase 9, PSMD6 - proteasome (prosome, macropain) 26s subunit, non-atpase, 6, LONP1 - lon peptidase 1, mitochondrial, DHX36 - deah (asp-glu-ala-his) box polypeptide 36, DHX8 - deah (asp-glu-ala-his) box polypeptide 8, RFC4 - replication factor c (activator 1) 4, 37kda, CHD6 - chromodom…
GO:0044249	cellular biosynthetic process	0.000535	0.0438	1.54	4208	1080	172	68	[CHD6 - chromodomain helicase dna binding protein 6, VPRBP - vpr (hiv-1) binding protein, EPC2 - enhancer of polycomb homolog 2 (drosophila), NCOA5 - nuclear receptor coactivator 5, SACM1L - sac1 suppressor of actin mutations 1-like (yeast), USF1 - upstream transcription factor 1, INPP5K - inositol polyphosphate-5-phosphatase k, SUPT6H - suppressor of ty 6 homolog (s. cerevisiae), FLI1 - fli-1 pr…
GO:0043231	intracellular membrane-bounded organelle	0.000892	0.0445	1.11	4208	2154	999	566	[ZMYND8 - zinc finger, mynd-type containing 8, ARAP1 - arfgap with rhogap domain, ankyrin repeat and ph domain 1, SPTAN1 - spectrin, alpha, non-erythrocytic 1, EXOSC10 - exosome component 10, TADA1 - transcriptional adaptor 1, NCOA5 - nuclear receptor coactivator 5, PATZ1 - poz (btb) and at hook containing zinc finger 1, FBXO18 - f-box protein, helicase, 18, METTL14 - methyltransferase like 14, C…
GO:0007276	gamete generation	0.000625	0.0496	2.06	4208	63	874	27	[SUN1 - sad1 and unc84 domain containing 1, DDX6 - dead (asp-glu-ala-asp) box helicase 6, HSF2 - heat shock transcription factor 2, PATZ1 - poz (btb) and at hook containing zinc finger 1, TESK1 - testis-specific kinase 1, CTDNEP1 - ctd nuclear envelope phosphatase 1, XRN2 - 5'-3' exoribonuclease 2, SPAG9 - sperm associated antigen 9, PUM1 - pumilio homolog 1 (drosophila), BRD2 - bromodomain conta…

## Sheet: heart, high to low
GO Term	Description	P-value	FDR q-value	Enrichment	N	B	n	b	Genes
GO:0044281	small molecule metabolic process	2.1e-12	2.19e-08	1.73	4211	482	741	147	[FMOD - fibromodulin, SLC27A1 - solute carrier family 27 (fatty acid transporter), member 1, PNKD - paroxysmal nonkinesigenic dyskinesia, SUCLG2 - succinate-coa ligase, gdp-forming, beta subunit, SUCLG1 - succinate-coa ligase, alpha subunit, ERLIN1 - er lipid raft associated 1, AMACR - alpha-methylacyl-coa racemase, PPIP5K2 - diphosphoinositol pentakisphosphate kinase 2, PNPO - pyridoxamine 5'-ph…
GO:0005615	extracellular space	1.71e-07	0.000239	1.72	4211	222	947	86	[FMOD - fibromodulin, MASP1 - mannan-binding lectin serine peptidase 1 (c4/c2 activating component of ra-reactive factor), TIMP4 - timp metallopeptidase inhibitor 4, LGALS8 - lectin, galactoside-binding, soluble, 8, SEMA4C - sema domain, immunoglobulin domain (ig), transmembrane domain (tm) and short cytoplasmic domain, (semaphorin) 4c, OLFM1 - olfactomedin 1, NOV - nephroblastoma overexpressed, …
GO:0044282	small molecule catabolic process	4.62e-08	0.000242	2.36	4211	111	741	46	[GALK1 - galactokinase 1, CROT - carnitine o-octanoyltransferase, PNKD - paroxysmal nonkinesigenic dyskinesia, SHMT1 - serine hydroxymethyltransferase 1 (soluble), GPT - glutamic-pyruvate transaminase (alanine aminotransferase), AMACR - alpha-methylacyl-coa racemase, ALDOC - aldolase c, fructose-bisphosphate, HYAL1 - hyaluronoglucosaminidase 1, BDH2 - 3-hydroxybutyrate dehydrogenase, type 2, MTMR…
GO:0006082	organic acid metabolic process	2.23e-07	0.000585	1.76	4211	275	741	85	[FMOD - fibromodulin, PRKAA2 - protein kinase, amp-activated, alpha 2 catalytic subunit, SLC27A1 - solute carrier family 27 (fatty acid transporter), member 1, HSD17B8 - hydroxysteroid (17-beta) dehydrogenase 8, SLC6A6 - solute carrier family 6 (neurotransmitter transporter), member 6, CROT - carnitine o-octanoyltransferase, PNKD - paroxysmal nonkinesigenic dyskinesia, SUCLG2 - succinate-coa liga…
GO:0043436	oxoacid metabolic process	2.23e-07	0.00078	1.76	4211	275	741	85	[FMOD - fibromodulin, PRKAA2 - protein kinase, amp-activated, alpha 2 catalytic subunit, SLC27A1 - solute carrier family 27 (fatty acid transporter), member 1, HSD17B8 - hydroxysteroid (17-beta) dehydrogenase 8, SLC6A6 - solute carrier family 6 (neurotransmitter transporter), member 6, CROT - carnitine o-octanoyltransferase, PNKD - paroxysmal nonkinesigenic dyskinesia, SUCLG2 - succinate-coa liga…
GO:0019752	carboxylic acid metabolic process	4.89e-07	0.00102	1.79	4211	241	741	76	[PRKAA2 - protein kinase, amp-activated, alpha 2 catalytic subunit, SLC27A1 - solute carrier family 27 (fatty acid transporter), member 1, HSD17B8 - hydroxysteroid (17-beta) dehydrogenase 8, SLC6A6 - solute carrier family 6 (neurotransmitter transporter), member 6, CROT - carnitine o-octanoyltransferase, PNKD - paroxysmal nonkinesigenic dyskinesia, SUCLG2 - succinate-coa ligase, gdp-forming, beta…
GO:0055086	nucleobase-containing small molecule metabolic process	2.01e-06	0.00351	2.09	4211	132	734	48	[GALK1 - galactokinase 1, PDE8A - phosphodiesterase 8a, CROT - carnitine o-octanoyltransferase, NMRK1 - nicotinamide riboside kinase 1, NMRK2 - nicotinamide riboside kinase 2, SHMT1 - serine hydroxymethyltransferase 1 (soluble), GAMT - guanidinoacetate n-methyltransferase, ATP1A2 - atpase, na+/k+ transporting, alpha 2 polypeptide, MFN1 - mitofusin 1, ALDOC - aldolase c, fructose-bisphosphate, NME…
GO:0072521	purine-containing compound metabolic process	2.85e-06	0.00427	2.31	4211	92	734	37	[GALK1 - galactokinase 1, PDE8A - phosphodiesterase 8a, CROT - carnitine o-octanoyltransferase, SHMT1 - serine hydroxymethyltransferase 1 (soluble), GAMT - guanidinoacetate n-methyltransferase, ATP1A2 - atpase, na+/k+ transporting, alpha 2 polypeptide, RHOQ - ras homolog family member q, NME3 - nme/nm23 nucleoside diphosphate kinase 3, MFN1 - mitofusin 1, ALDOC - aldolase c, fructose-bisphosphate…
GO:0044421	extracellular region part	9.89e-06	0.0046	1.28	4211	934	907	257	[CD93 - cd93 molecule, LGALS8 - lectin, galactoside-binding, soluble, 8, SEMA4C - sema domain, immunoglobulin domain (ig), transmembrane domain (tm) and short cytoplasmic domain, (semaphorin) 4c, SUCLG1 - succinate-coa ligase, alpha subunit, PLXDC2 - plexin domain containing 2, ELN - elastin, BDH2 - 3-hydroxybutyrate dehydrogenase, type 2, ENPEP - glutamyl aminopeptidase (aminopeptidase a), NAGA …
GO:0044449	contractile fiber part	7.44e-06	0.00519	6.04	4211	88	95	12	[TPM4 - tropomyosin 4, FXR1 - fragile x mental retardation, autosomal homolog 1, MYL4 - myosin, light chain 4, alkali; atrial, embryonic, CASQ1 - calsequestrin 1 (fast-twitch, skeletal muscle), TPM2 - tropomyosin 2 (beta), TIMP4 - timp metallopeptidase inhibitor 4, TNNI1 - troponin i type 1 (skeletal, slow), MYL7 - myosin, light chain 7, regulatory, KLHL40 - kelch-like family member 40, RPL15 - r…
GO:0031225	anchored component of membrane	1.55e-05	0.0054	5.46	4211	17	454	10	[ART3 - adp-ribosyltransferase 3, GPC1 - glypican 1, SEMA7A - semaphorin 7a, gpi membrane anchor (john milton hagen blood group), THY1 - thy-1 cell surface antigen, NCAM1 - neural cell adhesion molecule 1, HFE2 - hemochromatosis type 2 (juvenile), PRNP - prion protein, ALPL - alkaline phosphatase, liver/bone/kidney, TFPI - tissue factor pathway inhibitor (lipoprotein-associated coagulation inhibi…
GO:0072523	purine-containing compound catabolic process	4.16e-06	0.00545	5.34	4211	17	510	11	[DNPH1 - 2'-deoxynucleoside 5'-phosphate n-hydrolase 1, PDE8A - phosphodiesterase 8a, AOX1 - aldehyde oxidase 1, PDE4D - phosphodiesterase 4d, camp-specific, NT5C - 5', 3'-nucleotidase, cytosolic, AMPD3 - adenosine monophosphate deaminase 3, NUDT1 - nudix (nucleoside diphosphate linked moiety x)-type motif 1, NT5C1A - 5'-nucleotidase, cytosolic ia, NUDT7 - nudix (nucleoside diphosphate linked moi…
GO:0006753	nucleoside phosphate metabolic process	4.89e-06	0.00569	2.1	4211	120	734	44	[GALK1 - galactokinase 1, PDE8A - phosphodiesterase 8a, CROT - carnitine o-octanoyltransferase, NMRK1 - nicotinamide riboside kinase 1, NMRK2 - nicotinamide riboside kinase 2, SHMT1 - serine hydroxymethyltransferase 1 (soluble), ATP1A2 - atpase, na+/k+ transporting, alpha 2 polypeptide, MFN1 - mitofusin 1, ALDOC - aldolase c, fructose-bisphosphate, RHOQ - ras homolog family member q, NME3 - nme/n…
GO:1901606	alpha-amino acid catabolic process	1.04e-05	0.0109	3.5	4211	28	688	16	[ACAD8 - acyl-coa dehydrogenase family, member 8, DDAH1 - dimethylarginine dimethylaminohydrolase 1, GCAT - glycine c-acetyltransferase, C9orf41 - chromosome 9 open reading frame 41, DDAH2 - dimethylarginine dimethylaminohydrolase 2, SHMT1 - serine hydroxymethyltransferase 1 (soluble), GPT - glutamic-pyruvate transaminase (alanine aminotransferase), HMGCL - 3-hydroxymethyl-3-methylglutaryl-coa ly…
GO:0046395	carboxylic acid catabolic process	1.41e-05	0.0123	2.05	4211	82	975	39	[ACAA2 - acetyl-coa acyltransferase 2, CROT - carnitine o-octanoyltransferase, SHMT1 - serine hydroxymethyltransferase 1 (soluble), GPT - glutamic-pyruvate transaminase (alanine aminotransferase), AMACR - alpha-methylacyl-coa racemase, HYAL1 - hyaluronoglucosaminidase 1, BDH2 - 3-hydroxybutyrate dehydrogenase, type 2, FAH - fumarylacetoacetate hydrolase (fumarylacetoacetase), ALDH4A1 - aldehyde d…
GO:0016054	organic acid catabolic process	1.41e-05	0.0134	2.05	4211	82	975	39	[ACAA2 - acetyl-coa acyltransferase 2, CROT - carnitine o-octanoyltransferase, SHMT1 - serine hydroxymethyltransferase 1 (soluble), GPT - glutamic-pyruvate transaminase (alanine aminotransferase), AMACR - alpha-methylacyl-coa racemase, HYAL1 - hyaluronoglucosaminidase 1, BDH2 - 3-hydroxybutyrate dehydrogenase, type 2, FAH - fumarylacetoacetate hydrolase (fumarylacetoacetase), ALDH4A1 - aldehyde d…
GO:0009063	cellular amino acid catabolic process	2.21e-05	0.0165	2.89	4211	33	838	19	[ACAD8 - acyl-coa dehydrogenase family, member 8, DDAH1 - dimethylarginine dimethylaminohydrolase 1, GCAT - glycine c-acetyltransferase, C9orf41 - chromosome 9 open reading frame 41, DDAH2 - dimethylarginine dimethylaminohydrolase 2, SHMT1 - serine hydroxymethyltransferase 1 (soluble), GPT - glutamic-pyruvate transaminase (alanine aminotransferase), PCYOX1 - prenylcysteine oxidase 1, HMGCL - 3-hy…
GO:0009117	nucleotide metabolic process	2.21e-05	0.0178	2.04	4211	118	734	42	[GALK1 - galactokinase 1, PDE8A - phosphodiesterase 8a, CROT - carnitine o-octanoyltransferase, NMRK1 - nicotinamide riboside kinase 1, NMRK2 - nicotinamide riboside kinase 2, SHMT1 - serine hydroxymethyltransferase 1 (soluble), ATP1A2 - atpase, na+/k+ transporting, alpha 2 polypeptide, ALDOC - aldolase c, fructose-bisphosphate, MFN1 - mitofusin 1, NME3 - nme/nm23 nucleoside diphosphate kinase 3,…
GO:1901605	alpha-amino acid metabolic process	3.55e-05	0.0248	2.63	4211	62	619	24	[ACAD8 - acyl-coa dehydrogenase family, member 8, GATM - glycine amidinotransferase (l-arginine:glycine amidinotransferase), DDAH1 - dimethylarginine dimethylaminohydrolase 1, GCAT - glycine c-acetyltransferase, C9orf41 - chromosome 9 open reading frame 41, DDAH2 - dimethylarginine dimethylaminohydrolase 2, SHMT1 - serine hydroxymethyltransferase 1 (soluble), GPT - glutamic-pyruvate transaminase …
GO:0044706	multi-multicellular organism process	4.11e-05	0.0269	9.67	4211	24	127	7	[SLC38A3 - solute carrier family 38, member 3, FOS - fbj murine osteosarcoma viral oncogene homolog, IGFBP2 - insulin-like growth factor binding protein 2, 36kda, DDO - d-aspartate oxidase, CORIN - corin, serine peptidase, NPPA - natriuretic peptide a, UCP2 - uncoupling protein 2 (mitochondrial, proton carrier)]
GO:1901292	nucleoside phosphate catabolic process	5.06e-05	0.0279	4.12	4211	23	533	12	[DERA - deoxyribose-phosphate aldolase (putative), DNPH1 - 2'-deoxynucleoside 5'-phosphate n-hydrolase 1, PDE8A - phosphodiesterase 8a, SMPDL3A - sphingomyelin phosphodiesterase, acid-like 3a, NT5M - 5',3'-nucleotidase, mitochondrial, PDE4D - phosphodiesterase 4d, camp-specific, NT5C - 5', 3'-nucleotidase, cytosolic, AMPD3 - adenosine monophosphate deaminase 3, NT5C1A - 5'-nucleotidase, cytosolic…
GO:0019637	organophosphate metabolic process	4.62e-05	0.0285	1.64	4211	252	734	72	[SLC27A1 - solute carrier family 27 (fatty acid transporter), member 1, CROT - carnitine o-octanoyltransferase, ATP1A2 - atpase, na+/k+ transporting, alpha 2 polypeptide, RHOQ - ras homolog family member q, NME3 - nme/nm23 nucleoside diphosphate kinase 3, PPIP5K2 - diphosphoinositol pentakisphosphate kinase 2, PNPO - pyridoxamine 5'-phosphate oxidase, LPCAT4 - lysophosphatidylcholine acyltransfer…
GO:0006163	purine nucleotide metabolic process	5.05e-05	0.0294	2.21	4211	83	734	32	[GALK1 - galactokinase 1, PDE8A - phosphodiesterase 8a, CROT - carnitine o-octanoyltransferase, ATP1A2 - atpase, na+/k+ transporting, alpha 2 polypeptide, NME3 - nme/nm23 nucleoside diphosphate kinase 3, RHOQ - ras homolog family member q, ALDOC - aldolase c, fructose-bisphosphate, MFN1 - mitofusin 1, SLC25A25 - solute carrier family 25 (mitochondrial carrier; phosphate carrier), member 25, DNPH1…
GO:0031224	intrinsic component of membrane	0.000113	0.0315	1.24	4211	908	968	259	[CD93 - cd93 molecule, NIPA2 - non imprinted in prader-willi/angelman syndrome 2, SEMA4C - sema domain, immunoglobulin domain (ig), transmembrane domain (tm) and short cytoplasmic domain, (semaphorin) 4c, PLXDC2 - plexin domain containing 2, TOMM34 - translocase of outer mitochondrial membrane 34, ABCA2 - atp-binding cassette, sub-family a (abc1), member 2, ENPEP - glutamyl aminopeptidase (aminop…
GO:0006732	coenzyme metabolic process	7.77e-05	0.0388	2.35	4211	81	619	28	[HSD17B8 - hydroxysteroid (17-beta) dehydrogenase 8, GALK1 - galactokinase 1, THTPA - thiamine triphosphatase, NMRK1 - nicotinamide riboside kinase 1, NMRK2 - nicotinamide riboside kinase 2, LIAS - lipoic acid synthetase, SHMT1 - serine hydroxymethyltransferase 1 (soluble), SUCLG2 - succinate-coa ligase, gdp-forming, beta subunit, GAMT - guanidinoacetate n-methyltransferase, PNPO - pyridoxamine 5…
GO:0005576	extracellular region	0.000259	0.0402	1.61	4211	277	622	66	[FMOD - fibromodulin, GFOD1 - glucose-fructose oxidoreductase domain containing 1, MASP1 - mannan-binding lectin serine peptidase 1 (c4/c2 activating component of ra-reactive factor), HTRA3 - htra serine peptidase 3, ELN - elastin, IFI30 - interferon, gamma-inducible protein 30, DHRS7C - dehydrogenase/reductase (sdr family) member 7c, NOV - nephroblastoma overexpressed, SPARC - secreted protein, …
GO:0044703	multi-organism reproductive process	7.76e-05	0.0406	8.93	4211	26	127	7	[SLC38A3 - solute carrier family 38, member 3, FOS - fbj murine osteosarcoma viral oncogene homolog, IGFBP2 - insulin-like growth factor binding protein 2, 36kda, DDO - d-aspartate oxidase, CORIN - corin, serine peptidase, UCP2 - uncoupling protein 2 (mitochondrial, proton carrier), NPPA - natriuretic peptide a]
GO:0051186	cofactor metabolic process	9.08e-05	0.0432	2.14	4211	108	619	34	[HSD17B8 - hydroxysteroid (17-beta) dehydrogenase 8, GALK1 - galactokinase 1, THTPA - thiamine triphosphatase, NMRK1 - nicotinamide riboside kinase 1, NMRK2 - nicotinamide riboside kinase 2, LIAS - lipoic acid synthetase, SHMT1 - serine hydroxymethyltransferase 1 (soluble), GAMT - guanidinoacetate n-methyltransferase, SUCLG2 - succinate-coa ligase, gdp-forming, beta subunit, ALDOC - aldolase c, f…
GO:0016021	integral component of membrane	0.000252	0.044	1.23	4211	893	968	253	[CD93 - cd93 molecule, NIPA2 - non imprinted in prader-willi/angelman syndrome 2, SEMA4C - sema domain, immunoglobulin domain (ig), transmembrane domain (tm) and short cytoplasmic domain, (semaphorin) 4c, PLXDC2 - plexin domain containing 2, TOMM34 - translocase of outer mitochondrial membrane 34, ABCA2 - atp-binding cassette, sub-family a (abc1), member 2, ENPEP - glutamyl aminopeptidase (aminop…
GO:0071295	cellular response to vitamin	0.00011	0.046	10.94	4211	7	275	5	[COL1A1 - collagen, type i, alpha 1, SFRP1 - secreted frizzled-related protein 1, PTN - pleiotrophin, GAS6 - growth arrest-specific 6, POSTN - periostin, osteoblast specific factor]
GO:0009166	nucleotide catabolic process	0.000109	0.0476	4.14	4211	21	533	11	[DERA - deoxyribose-phosphate aldolase (putative), DNPH1 - 2'-deoxynucleoside 5'-phosphate n-hydrolase 1, PDE8A - phosphodiesterase 8a, NT5M - 5',3'-nucleotidase, mitochondrial, PDE4D - phosphodiesterase 4d, camp-specific, NT5C - 5', 3'-nucleotidase, cytosolic, AMPD3 - adenosine monophosphate deaminase 3, NUDT1 - nudix (nucleoside diphosphate linked moiety x)-type motif 1, NT5C1A - 5'-nucleotidas…
GO:0006195	purine nucleotide catabolic process	0.000108	0.049	4.95	4211	15	510	9	[DNPH1 - 2'-deoxynucleoside 5'-phosphate n-hydrolase 1, PDE8A - phosphodiesterase 8a, PDE4D - phosphodiesterase 4d, camp-specific, NT5C - 5', 3'-nucleotidase, cytosolic, AMPD3 - adenosine monophosphate deaminase 3, NUDT1 - nudix (nucleoside diphosphate linked moiety x)-type motif 1, NT5C1A - 5'-nucleotidase, cytosolic ia, PDE4A - phosphodiesterase 4a, camp-specific, NUDT7 - nudix (nucleoside diph…
GO:0005578	proteinaceous extracellular matrix	0.000716	0.0714	2.03	4211	60	932	27	[FMOD - fibromodulin, PHOSPHO1 - phosphatase, orphan 1, ADAMTS9 - adam metallopeptidase with thrombospondin type 1 motif, 9, TIMP4 - timp metallopeptidase inhibitor 4, CRISPLD2 - cysteine-rich secretory protein lccl domain containing 2, MMP23B - matrix metallopeptidase 23b, ELN - elastin, NOV - nephroblastoma overexpressed, ADAMTS7 - adam metallopeptidase with thrombospondin type 1 motif, 7, GPC1…
GO:0016491	oxidoreductase activity	0.000558	0.387	1.89	4211	176	507	40	[GFOD1 - glucose-fructose oxidoreductase domain containing 1, HSD17B8 - hydroxysteroid (17-beta) dehydrogenase 8, ME3 - malic enzyme 3, nadp(+)-dependent, mitochondrial, PNPO - pyridoxamine 5'-phosphate oxidase, IFI30 - interferon, gamma-inducible protein 30, TXNDC17 - thioredoxin domain containing 17, TECRL - trans-2,3-enoyl-coa reductase-like, DHCR24 - 24-dehydrocholesterol reductase, DHRS7C - …
GO:0019212	phosphatase inhibitor activity	0.000929	0.429	8.75	4211	13	185	5	[PPP1R8 - protein phosphatase 1, regulatory subunit 8, PTN - pleiotrophin, SH3RF2 - sh3 domain containing ring finger 2, PPP1R14A - protein phosphatase 1, regulatory (inhibitor) subunit 14a, PHACTR1 - phosphatase and actin regulator 1]
GO:0030414	peptidase inhibitor activity	0.000327	0.453	4.77	4211	21	378	9	[SERPINE2 - serpin peptidase inhibitor, clade e (nexin, plasminogen activator inhibitor type 1), member 2, TIMP4 - timp metallopeptidase inhibitor 4, TNFAIP8 - tumor necrosis factor, alpha-induced protein 8, SPOCK2 - sparc/osteonectin, cwcv and kazal-like domains proteoglycan (testican) 2, SERPINE1 - serpin peptidase inhibitor, clade e (nexin, plasminogen activator inhibitor type 1), member 1, GA…

## Sheet: kidney, low to high
GO Term	Description	P-value	FDR q-value	Enrichment	N	B	n	b	Genes
GO:0005654	nucleoplasm	1.87e-25	2.63e-22	1.6	4383	994	963	350	[SMARCAD1 - swi/snf-related, matrix-associated actin-dependent regulator of chromatin, subfamily a, containing dead/h box 1, CCNK - cyclin k, ARAP1 - arfgap with rhogap domain, ankyrin repeat and ph domain 1, ELL - elongation factor rna polymerase ii, BNIP3 - bcl2/adenovirus e1b 19kda interacting protein 3, VEZT - vezatin, adherens junctions transmembrane protein, MARK2 - map/microtubule affinity…
GO:0044428	nuclear part	5.69e-25	4.01e-22	1.48	4383	1371	950	439	[ARAP1 - arfgap with rhogap domain, ankyrin repeat and ph domain 1, ELL - elongation factor rna polymerase ii, VEZT - vezatin, adherens junctions transmembrane protein, EXOSC10 - exosome component 10, SYMPK - symplekin, TADA1 - transcriptional adaptor 1, PATZ1 - poz (btb) and at hook containing zinc finger 1, CBX1 - chromobox homolog 1, NCOR2 - nuclear receptor corepressor 2, PML - promyelocytic …
GO:0016070	RNA metabolic process	2.37e-20	8.49e-17	1.58	4383	905	958	312	[CCNK - cyclin k, ZMYND8 - zinc finger, mynd-type containing 8, ELL - elongation factor rna polymerase ii, EXOSC10 - exosome component 10, SYMPK - symplekin, POLR3D - polymerase (rna) iii (dna directed) polypeptide d, 44kda, TADA1 - transcriptional adaptor 1, NCOA5 - nuclear receptor coactivator 5, AARS - alanyl-trna synthetase, DHX30 - deah (asp-glu-ala-his) box helicase 30, RFX5 - regulatory fa…
GO:0090304	nucleic acid metabolic process	1.03e-20	1.11e-16	1.53	4383	1029	958	345	[SMARCAD1 - swi/snf-related, matrix-associated actin-dependent regulator of chromatin, subfamily a, containing dead/h box 1, CCNK - cyclin k, ZMYND8 - zinc finger, mynd-type containing 8, ELL - elongation factor rna polymerase ii, EXOSC10 - exosome component 10, SYMPK - symplekin, POLR3D - polymerase (rna) iii (dna directed) polypeptide d, 44kda, TADA1 - transcriptional adaptor 1, NCOA5 - nuclear…
GO:0044260	cellular macromolecule metabolic process	2.17e-20	1.16e-16	1.39	4383	1896	737	442	[ELL - elongation factor rna polymerase ii, EXOSC10 - exosome component 10, SYMPK - symplekin, TADA1 - transcriptional adaptor 1, NCOA5 - nuclear receptor coactivator 5, AARS - alanyl-trna synthetase, CD2AP - cd2-associated protein, NCOR2 - nuclear receptor corepressor 2, PML - promyelocytic leukemia, ZNF410 - zinc finger protein 410, BFAR - bifunctional apoptosis regulator, NAA25 - n(alpha)-acet…
GO:0003676	nucleic acid binding	8.64e-19	2.46e-15	1.51	4383	1000	984	339	[SMARCAD1 - swi/snf-related, matrix-associated actin-dependent regulator of chromatin, subfamily a, containing dead/h box 1, ZMYND8 - zinc finger, mynd-type containing 8, MAPRE1 - microtubule-associated protein, rp/eb family, member 1, MARK2 - map/microtubule affinity-regulating kinase 2, EXOSC10 - exosome component 10, POLR3D - polymerase (rna) iii (dna directed) polypeptide d, 44kda, NCOA5 - nu…
GO:0044451	nucleoplasm part	4.15e-17	1.95e-14	1.91	4383	377	950	156	[DHX9 - deah (asp-glu-ala-his) box helicase 9, ELL - elongation factor rna polymerase ii, VPS72 - vacuolar protein sorting 72 homolog (s. cerevisiae), DHX8 - deah (asp-glu-ala-his) box polypeptide 8, PNISR - pnn-interacting serine/arginine-rich protein, POLR3D - polymerase (rna) iii (dna directed) polypeptide d, 44kda, TADA1 - transcriptional adaptor 1, TCF12 - transcription factor 12, TCF20 - tr…
GO:0043170	macromolecule metabolic process	5.93e-17	1.59e-13	1.33	4383	2032	735	454	[ELL - elongation factor rna polymerase ii, EXOSC10 - exosome component 10, SYMPK - symplekin, TADA1 - transcriptional adaptor 1, NCOA5 - nuclear receptor coactivator 5, AARS - alanyl-trna synthetase, CD2AP - cd2-associated protein, NCOR2 - nuclear receptor corepressor 2, PML - promyelocytic leukemia, ZNF410 - zinc finger protein 410, BFAR - bifunctional apoptosis regulator, NAA25 - n(alpha)-acet…
GO:0003723	RNA binding	3.5e-15	4.97e-12	1.71	4383	501	983	192	[DHX9 - deah (asp-glu-ala-his) box helicase 9, DHX8 - deah (asp-glu-ala-his) box polypeptide 8, DHX36 - deah (asp-glu-ala-his) box polypeptide 36, MAPRE1 - microtubule-associated protein, rp/eb family, member 1, PNISR - pnn-interacting serine/arginine-rich protein, MARK2 - map/microtubule affinity-regulating kinase 2, EXOSC10 - exosome component 10, DTX3L - deltex 3-like (drosophila), PARN - poly…
GO:0010556	regulation of macromolecule biosynthetic process	5.74e-15	1.23e-11	1.48	4383	1085	830	305	[TOB1 - transducer of erbb2, 1, SMARCAD1 - swi/snf-related, matrix-associated actin-dependent regulator of chromatin, subfamily a, containing dead/h box 1, CCNK - cyclin k, ELL - elongation factor rna polymerase ii, EXOSC10 - exosome component 10, TADA1 - transcriptional adaptor 1, NCOA5 - nuclear receptor coactivator 5, TRAK1 - trafficking protein, kinesin binding 1, AARS - alanyl-trna synthetas…
GO:0032991	macromolecular complex	3.8e-14	1.34e-11	1.38	4383	1432	850	383	[TOB1 - transducer of erbb2, 1, CCNK - cyclin k, ELL - elongation factor rna polymerase ii, EXOSC10 - exosome component 10, SYMPK - symplekin, POLR3D - polymerase (rna) iii (dna directed) polypeptide d, 44kda, TADA1 - transcriptional adaptor 1, AAMP - angio-associated, migratory cell protein, DHX30 - deah (asp-glu-ala-his) box helicase 30, GDI1 - gdp dissociation inhibitor 1, CD2AP - cd2-associat…
GO:1902494	catalytic complex	1.07e-13	3.02e-11	1.75	4383	437	883	154	[CCNK - cyclin k, DHX8 - deah (asp-glu-ala-his) box polypeptide 8, EXOSC10 - exosome component 10, TADA1 - transcriptional adaptor 1, POLR3D - polymerase (rna) iii (dna directed) polypeptide d, 44kda, KBTBD2 - kelch repeat and btb (poz) domain containing 2, RBCK1 - ranbp-type and c3hc4-type zinc finger containing 1, HTRA2 - htra serine peptidase 2, DCTN1 - dynactin 1, NCOR2 - nuclear receptor cor…
GO:0006139	nucleobase-containing compound metabolic process	1.95e-14	3.49e-11	1.45	4383	1172	846	327	[SMARCAD1 - swi/snf-related, matrix-associated actin-dependent regulator of chromatin, subfamily a, containing dead/h box 1, CCNK - cyclin k, ELL - elongation factor rna polymerase ii, EXOSC10 - exosome component 10, SYMPK - symplekin, POLR3D - polymerase (rna) iii (dna directed) polypeptide d, 44kda, TADA1 - transcriptional adaptor 1, NCOA5 - nuclear receptor coactivator 5, AARS - alanyl-trna sy…
GO:0010468	regulation of gene expression	2.29e-14	3.52e-11	1.45	4383	1161	835	321	[TOB1 - transducer of erbb2, 1, SMARCAD1 - swi/snf-related, matrix-associated actin-dependent regulator of chromatin, subfamily a, containing dead/h box 1, CCNK - cyclin k, ELL - elongation factor rna polymerase ii, EXOSC10 - exosome component 10, TADA1 - transcriptional adaptor 1, NCOA5 - nuclear receptor coactivator 5, TRAK1 - trafficking protein, kinesin binding 1, AARS - alanyl-trna synthetas…
GO:0019219	regulation of nucleobase-containing compound metabolic process	3.7e-14	4.97e-11	1.44	4383	1086	922	329	[SMARCAD1 - swi/snf-related, matrix-associated actin-dependent regulator of chromatin, subfamily a, containing dead/h box 1, TOB1 - transducer of erbb2, 1, CCNK - cyclin k, ZMYND8 - zinc finger, mynd-type containing 8, ELL - elongation factor rna polymerase ii, EXOSC10 - exosome component 10, TADA1 - transcriptional adaptor 1, NCOA5 - nuclear receptor coactivator 5, TRAK1 - trafficking protein, k…
GO:0019222	regulation of metabolic process	5.57e-14	5.99e-11	1.45	4383	1713	448	254	[SMARCAD1 - swi/snf-related, matrix-associated actin-dependent regulator of chromatin, subfamily a, containing dead/h box 1, CCNK - cyclin k, SYMPK - symplekin, TADA1 - transcriptional adaptor 1, AARS - alanyl-trna synthetase, TSC22D4 - tsc22 domain family, member 4, RELA - v-rel avian reticuloendotheliosis viral oncogene homolog a, SCAP - srebf chaperone, BCOR - bcl6 corepressor, IQGAP1 - iq mot…
GO:0009889	regulation of biosynthetic process	5.44e-14	6.5e-11	1.4	4383	1161	922	341	[TOB1 - transducer of erbb2, 1, SMARCAD1 - swi/snf-related, matrix-associated actin-dependent regulator of chromatin, subfamily a, containing dead/h box 1, CCNK - cyclin k, ZMYND8 - zinc finger, mynd-type containing 8, ELL - elongation factor rna polymerase ii, EXOSC10 - exosome component 10, TADA1 - transcriptional adaptor 1, NCOA5 - nuclear receptor coactivator 5, TRAK1 - trafficking protein, k…
GO:2000112	regulation of cellular macromolecule biosynthetic process	1.03e-13	1e-10	1.47	4383	1062	830	296	[TOB1 - transducer of erbb2, 1, SMARCAD1 - swi/snf-related, matrix-associated actin-dependent regulator of chromatin, subfamily a, containing dead/h box 1, CCNK - cyclin k, ELL - elongation factor rna polymerase ii, EXOSC10 - exosome component 10, TADA1 - transcriptional adaptor 1, NCOA5 - nuclear receptor coactivator 5, TRAK1 - trafficking protein, kinesin binding 1, AARS - alanyl-trna synthetas…
GO:0060255	regulation of macromolecule metabolic process	1.2e-13	1.08e-10	1.44	4383	1566	518	267	[ARAP1 - arfgap with rhogap domain, ankyrin repeat and ph domain 1, SMARCAD1 - swi/snf-related, matrix-associated actin-dependent regulator of chromatin, subfamily a, containing dead/h box 1, CCNK - cyclin k, EXOSC10 - exosome component 10, SYMPK - symplekin, TADA1 - transcriptional adaptor 1, NCOA5 - nuclear receptor coactivator 5, AARS - alanyl-trna synthetase, TRAK1 - trafficking protein, kine…
GO:0051252	regulation of RNA metabolic process	2.33e-13	1.93e-10	1.46	4383	989	922	303	[TOB1 - transducer of erbb2, 1, SMARCAD1 - swi/snf-related, matrix-associated actin-dependent regulator of chromatin, subfamily a, containing dead/h box 1, CCNK - cyclin k, ZMYND8 - zinc finger, mynd-type containing 8, ELL - elongation factor rna polymerase ii, TADA1 - transcriptional adaptor 1, NCOA5 - nuclear receptor coactivator 5, TRAK1 - trafficking protein, kinesin binding 1, RFX5 - regulat…
GO:0032774	RNA biosynthetic process	3.16e-13	2.42e-10	1.96	4383	662	425	126	[CCNK - cyclin k, DHX36 - deah (asp-glu-ala-his) box polypeptide 36, SYMPK - symplekin, TADA1 - transcriptional adaptor 1, POLR3D - polymerase (rna) iii (dna directed) polypeptide d, 44kda, ZEB1 - zinc finger e-box binding homeobox 1, SETDB1 - set domain, bifurcated 1, TCF12 - transcription factor 12, TSC22D4 - tsc22 domain family, member 4, TCF20 - transcription factor 20 (ar1), RELA - v-rel avi…
GO:0031326	regulation of cellular biosynthetic process	6.84e-13	4.9e-10	1.44	4383	1135	830	309	[TOB1 - transducer of erbb2, 1, SMARCAD1 - swi/snf-related, matrix-associated actin-dependent regulator of chromatin, subfamily a, containing dead/h box 1, CCNK - cyclin k, ELL - elongation factor rna polymerase ii, EXOSC10 - exosome component 10, TADA1 - transcriptional adaptor 1, NCOA5 - nuclear receptor coactivator 5, TRAK1 - trafficking protein, kinesin binding 1, AARS - alanyl-trna synthetas…
GO:0046483	heterocycle metabolic process	7.46e-13	5.02e-10	1.38	4383	1227	846	328	[SMARCAD1 - swi/snf-related, matrix-associated actin-dependent regulator of chromatin, subfamily a, containing dead/h box 1, CCNK - cyclin k, ELL - elongation factor rna polymerase ii, EXOSC10 - exosome component 10, SYMPK - symplekin, POLR3D - polymerase (rna) iii (dna directed) polypeptide d, 44kda, TADA1 - transcriptional adaptor 1, NCOA5 - nuclear receptor coactivator 5, AARS - alanyl-trna sy…
GO:0006725	cellular aromatic compound metabolic process	8.55e-13	5.41e-10	1.38	4383	1228	846	328	[SMARCAD1 - swi/snf-related, matrix-associated actin-dependent regulator of chromatin, subfamily a, containing dead/h box 1, CCNK - cyclin k, ELL - elongation factor rna polymerase ii, EXOSC10 - exosome component 10, SYMPK - symplekin, POLR3D - polymerase (rna) iii (dna directed) polypeptide d, 44kda, TADA1 - transcriptional adaptor 1, NCOA5 - nuclear receptor coactivator 5, AARS - alanyl-trna sy…
GO:2001141	regulation of RNA biosynthetic process	1.37e-12	8.16e-10	1.44	4383	930	922	281	[SMARCAD1 - swi/snf-related, matrix-associated actin-dependent regulator of chromatin, subfamily a, containing dead/h box 1, TOB1 - transducer of erbb2, 1, CCNK - cyclin k, ZMYND8 - zinc finger, mynd-type containing 8, ELL - elongation factor rna polymerase ii, TADA1 - transcriptional adaptor 1, NCOA5 - nuclear receptor coactivator 5, TRAK1 - trafficking protein, kinesin binding 1, RFX5 - regulat…
GO:0031323	regulation of cellular metabolic process	1.6e-12	9.03e-10	1.29	4383	1613	922	438	[ZMYND8 - zinc finger, mynd-type containing 8, ARAP1 - arfgap with rhogap domain, ankyrin repeat and ph domain 1, ELL - elongation factor rna polymerase ii, EXOSC10 - exosome component 10, SYMPK - symplekin, TADA1 - transcriptional adaptor 1, NCOA5 - nuclear receptor coactivator 5, AARS - alanyl-trna synthetase, PATZ1 - poz (btb) and at hook containing zinc finger 1, CORO1C - coronin, actin bindi…
GO:1903506	regulation of nucleic acid-templated transcription	2.97e-12	1.59e-09	1.43	4383	927	922	279	[SMARCAD1 - swi/snf-related, matrix-associated actin-dependent regulator of chromatin, subfamily a, containing dead/h box 1, TOB1 - transducer of erbb2, 1, CCNK - cyclin k, ZMYND8 - zinc finger, mynd-type containing 8, ELL - elongation factor rna polymerase ii, TADA1 - transcriptional adaptor 1, NCOA5 - nuclear receptor coactivator 5, TRAK1 - trafficking protein, kinesin binding 1, RFX5 - regulat…
GO:0006396	RNA processing	5.58e-12	2.86e-09	1.86	4383	270	971	111	[DHX9 - deah (asp-glu-ala-his) box helicase 9, DHX36 - deah (asp-glu-ala-his) box polypeptide 36, DHX8 - deah (asp-glu-ala-his) box polypeptide 8, EXOSC10 - exosome component 10, SYMPK - symplekin, AARS - alanyl-trna synthetase, DHX30 - deah (asp-glu-ala-his) box helicase 30, INTS10 - integrator complex subunit 10, PRPF8 - pre-mrna processing factor 8, USB1 - u6 snrna biogenesis 1, CPSF3 - cleava…
GO:0097659	nucleic acid-templated transcription	1.02e-11	4.77e-09	1.59	4383	593	846	182	[CCNK - cyclin k, VPS72 - vacuolar protein sorting 72 homolog (s. cerevisiae), DHX36 - deah (asp-glu-ala-his) box polypeptide 36, ELL - elongation factor rna polymerase ii, TADA1 - transcriptional adaptor 1, POLR3D - polymerase (rna) iii (dna directed) polypeptide d, 44kda, NCOA5 - nuclear receptor coactivator 5, ZEB1 - zinc finger e-box binding homeobox 1, SETDB1 - set domain, bifurcated 1, TCF1…
GO:0006351	transcription, DNA-templated	1.02e-11	4.99e-09	1.59	4383	593	846	182	[CCNK - cyclin k, VPS72 - vacuolar protein sorting 72 homolog (s. cerevisiae), DHX36 - deah (asp-glu-ala-his) box polypeptide 36, ELL - elongation factor rna polymerase ii, TADA1 - transcriptional adaptor 1, POLR3D - polymerase (rna) iii (dna directed) polypeptide d, 44kda, NCOA5 - nuclear receptor coactivator 5, SETDB1 - set domain, bifurcated 1, ZEB1 - zinc finger e-box binding homeobox 1, TCF1…
GO:0006355	regulation of transcription, DNA-templated	1.31e-11	5.88e-09	1.42	4383	920	922	275	[SMARCAD1 - swi/snf-related, matrix-associated actin-dependent regulator of chromatin, subfamily a, containing dead/h box 1, TOB1 - transducer of erbb2, 1, CCNK - cyclin k, ZMYND8 - zinc finger, mynd-type containing 8, ELL - elongation factor rna polymerase ii, TADA1 - transcriptional adaptor 1, NCOA5 - nuclear receptor coactivator 5, TRAK1 - trafficking protein, kinesin binding 1, RFX5 - regulat…
GO:0034654	nucleobase-containing compound biosynthetic process	1.77e-11	7.34e-09	1.77	4383	759	428	131	[CCNK - cyclin k, DHX36 - deah (asp-glu-ala-his) box polypeptide 36, SYMPK - symplekin, TADA1 - transcriptional adaptor 1, POLR3D - polymerase (rna) iii (dna directed) polypeptide d, 44kda, SETDB1 - set domain, bifurcated 1, ZEB1 - zinc finger e-box binding homeobox 1, TCF12 - transcription factor 12, TSC22D4 - tsc22 domain family, member 4, TCF20 - transcription factor 20 (ar1), RELA - v-rel avi…
GO:0080090	regulation of primary metabolic process	1.72e-11	7.41e-09	1.4	4383	1574	518	261	[SMARCAD1 - swi/snf-related, matrix-associated actin-dependent regulator of chromatin, subfamily a, containing dead/h box 1, CCNK - cyclin k, EXOSC10 - exosome component 10, SYMPK - symplekin, TADA1 - transcriptional adaptor 1, NCOA5 - nuclear receptor coactivator 5, AARS - alanyl-trna synthetase, TRAK1 - trafficking protein, kinesin binding 1, TSC22D4 - tsc22 domain family, member 4, RELA - v-re…
GO:0009059	macromolecule biosynthetic process	1.96e-11	7.81e-09	1.73	4383	815	425	137	[CCNK - cyclin k, DHX36 - deah (asp-glu-ala-his) box polypeptide 36, SYMPK - symplekin, POLR3D - polymerase (rna) iii (dna directed) polypeptide d, 44kda, TADA1 - transcriptional adaptor 1, ZEB1 - zinc finger e-box binding homeobox 1, SETDB1 - set domain, bifurcated 1, TCF12 - transcription factor 12, TSC22D4 - tsc22 domain family, member 4, TCF20 - transcription factor 20 (ar1), RELA - v-rel avi…
GO:0034641	cellular nitrogen compound metabolic process	2.23e-11	8.57e-09	1.35	4383	1321	825	335	[SMARCAD1 - swi/snf-related, matrix-associated actin-dependent regulator of chromatin, subfamily a, containing dead/h box 1, CCNK - cyclin k, ELL - elongation factor rna polymerase ii, EXOSC10 - exosome component 10, SYMPK - symplekin, POLR3D - polymerase (rna) iii (dna directed) polypeptide d, 44kda, TADA1 - transcriptional adaptor 1, NCOA5 - nuclear receptor coactivator 5, AARS - alanyl-trna sy…
GO:0051171	regulation of nitrogen compound metabolic process	2.69e-11	9.98e-09	1.41	4383	1524	518	254	[CCNK - cyclin k, SMARCAD1 - swi/snf-related, matrix-associated actin-dependent regulator of chromatin, subfamily a, containing dead/h box 1, EXOSC10 - exosome component 10, SYMPK - symplekin, TADA1 - transcriptional adaptor 1, NCOA5 - nuclear receptor coactivator 5, AARS - alanyl-trna synthetase, TRAK1 - trafficking protein, kinesin binding 1, TSC22D4 - tsc22 domain family, member 4, RELA - v-re…
GO:0044427	chromosomal part	4.39e-11	1.03e-08	2.51	4383	234	448	60	[SMARCAD1 - swi/snf-related, matrix-associated actin-dependent regulator of chromatin, subfamily a, containing dead/h box 1, DHX36 - deah (asp-glu-ala-his) box polypeptide 36, POLR3D - polymerase (rna) iii (dna directed) polypeptide d, 44kda, MCRS1 - microspherule protein 1, NUP133 - nucleoporin 133kda, TCF12 - transcription factor 12, XPO1 - exportin 1 (crm1 homolog, yeast), XRCC1 - x-ray repair…
GO:0016071	mRNA metabolic process	3.95e-11	1.42e-08	2.13	4383	203	781	77	[HNRNPUL1 - heterogeneous nuclear ribonucleoprotein u-like 1, DHX9 - deah (asp-glu-ala-his) box helicase 9, DHX8 - deah (asp-glu-ala-his) box polypeptide 8, CSTF1 - cleavage stimulation factor, 3' pre-rna, subunit 1, 50kda, EXOSC10 - exosome component 10, DHX32 - deah (asp-glu-ala-his) box polypeptide 32, SYMPK - symplekin, PARN - poly(a)-specific ribonuclease, PRPF3 - pre-mrna processing factor …
GO:1901360	organic cyclic compound metabolic process	5.32e-11	1.79e-08	1.34	4383	1299	846	336	[SMARCAD1 - swi/snf-related, matrix-associated actin-dependent regulator of chromatin, subfamily a, containing dead/h box 1, CCNK - cyclin k, ELL - elongation factor rna polymerase ii, EXOSC10 - exosome component 10, SYMPK - symplekin, POLR3D - polymerase (rna) iii (dna directed) polypeptide d, 44kda, TADA1 - transcriptional adaptor 1, NCOA5 - nuclear receptor coactivator 5, STARD3 - star-related…
GO:0019438	aromatic compound biosynthetic process	5.29e-11	1.84e-08	1.74	4383	778	428	132	[CCNK - cyclin k, DHX36 - deah (asp-glu-ala-his) box polypeptide 36, SYMPK - symplekin, POLR3D - polymerase (rna) iii (dna directed) polypeptide d, 44kda, TADA1 - transcriptional adaptor 1, ZEB1 - zinc finger e-box binding homeobox 1, SETDB1 - set domain, bifurcated 1, TCF12 - transcription factor 12, TSC22D4 - tsc22 domain family, member 4, TCF20 - transcription factor 20 (ar1), RELA - v-rel avi…
GO:1901363	heterocyclic compound binding	2.85e-11	2.03e-08	1.27	4383	1573	991	451	[ZMYND8 - zinc finger, mynd-type containing 8, EXOSC10 - exosome component 10, AGAP3 - arfgap with gtpase domain, ankyrin repeat and ph domain 3, NCOA5 - nuclear receptor coactivator 5, AARS - alanyl-trna synthetase, PATZ1 - poz (btb) and at hook containing zinc finger 1, ABCB7 - atp-binding cassette, sub-family b (mdr/tap), member 7, NCOR2 - nuclear receptor corepressor 2, PML - promyelocytic le…
GO:0006325	chromatin organization	7.79e-11	2.46e-08	2.07	4383	208	803	79	[SMARCAD1 - swi/snf-related, matrix-associated actin-dependent regulator of chromatin, subfamily a, containing dead/h box 1, VPS72 - vacuolar protein sorting 72 homolog (s. cerevisiae), CHD6 - chromodomain helicase dna binding protein 6, VPRBP - vpr (hiv-1) binding protein, EPC2 - enhancer of polycomb homolog 2 (drosophila), DTX3L - deltex 3-like (drosophila), EHMT1 - euchromatic histone-lysine n…
GO:0018130	heterocycle biosynthetic process	7.77e-11	2.53e-08	1.73	4383	782	428	132	[CCNK - cyclin k, DHX36 - deah (asp-glu-ala-his) box polypeptide 36, SYMPK - symplekin, POLR3D - polymerase (rna) iii (dna directed) polypeptide d, 44kda, TADA1 - transcriptional adaptor 1, ZEB1 - zinc finger e-box binding homeobox 1, SETDB1 - set domain, bifurcated 1, TCF12 - transcription factor 12, TSC22D4 - tsc22 domain family, member 4, TCF20 - transcription factor 20 (ar1), RELA - v-rel avi…
GO:0005515	protein binding	2.82e-11	2.67e-08	1.15	4383	3083	726	588	[ARAP1 - arfgap with rhogap domain, ankyrin repeat and ph domain 1, ELL - elongation factor rna polymerase ii, VEZT - vezatin, adherens junctions transmembrane protein, EXOSC10 - exosome component 10, SYMPK - symplekin, AAMP - angio-associated, migratory cell protein, NCOA5 - nuclear receptor coactivator 5, STARD3 - star-related lipid transfer (start) domain containing 3, GDI1 - gdp dissociation …
GO:0050789	regulation of biological process	1.31e-10	4.04e-08	1.24	4383	2654	451	339	[CCNK - cyclin k, ARAP1 - arfgap with rhogap domain, ankyrin repeat and ph domain 1, SMARCAD1 - swi/snf-related, matrix-associated actin-dependent regulator of chromatin, subfamily a, containing dead/h box 1, MAPRE1 - microtubule-associated protein, rp/eb family, member 1, AGAP3 - arfgap with gtpase domain, ankyrin repeat and ph domain 3, SYMPK - symplekin, TADA1 - transcriptional adaptor 1, POLR…
GO:0097159	organic cyclic compound binding	8.95e-11	5.09e-08	1.26	4383	1595	991	454	[ZMYND8 - zinc finger, mynd-type containing 8, EXOSC10 - exosome component 10, AGAP3 - arfgap with gtpase domain, ankyrin repeat and ph domain 3, NCOA5 - nuclear receptor coactivator 5, STARD3 - star-related lipid transfer (start) domain containing 3, AARS - alanyl-trna synthetase, PATZ1 - poz (btb) and at hook containing zinc finger 1, ABCB7 - atp-binding cassette, sub-family b (mdr/tap), member…
GO:0006807	nitrogen compound metabolic process	1.96e-10	5.86e-08	1.22	4383	2265	728	460	[ELL - elongation factor rna polymerase ii, EXOSC10 - exosome component 10, SYMPK - symplekin, TADA1 - transcriptional adaptor 1, NCOA5 - nuclear receptor coactivator 5, AARS - alanyl-trna synthetase, CD2AP - cd2-associated protein, NCOR2 - nuclear receptor corepressor 2, COX15 - cytochrome c oxidase assembly homolog 15 (yeast), PML - promyelocytic leukemia, PANK2 - pantothenate kinase 2, SMPD4 -…
GO:0050794	regulation of cellular process	2.13e-10	6.2e-08	1.25	4383	2533	451	327	[CCNK - cyclin k, ARAP1 - arfgap with rhogap domain, ankyrin repeat and ph domain 1, SMARCAD1 - swi/snf-related, matrix-associated actin-dependent regulator of chromatin, subfamily a, containing dead/h box 1, MAPRE1 - microtubule-associated protein, rp/eb family, member 1, AGAP3 - arfgap with gtpase domain, ankyrin repeat and ph domain 3, SYMPK - symplekin, TADA1 - transcriptional adaptor 1, AAMP…
GO:0044271	cellular nitrogen compound biosynthetic process	2.99e-10	8.45e-08	1.67	4383	846	428	138	[CCNK - cyclin k, DHX36 - deah (asp-glu-ala-his) box polypeptide 36, SYMPK - symplekin, POLR3D - polymerase (rna) iii (dna directed) polypeptide d, 44kda, TADA1 - transcriptional adaptor 1, ZEB1 - zinc finger e-box binding homeobox 1, SETDB1 - set domain, bifurcated 1, TCF12 - transcription factor 12, TSC22D4 - tsc22 domain family, member 4, TCF20 - transcription factor 20 (ar1), RELA - v-rel avi…
GO:0016604	nuclear body	1.09e-09	2.19e-07	1.81	4383	248	945	97	[DHX9 - deah (asp-glu-ala-his) box helicase 9, DHX8 - deah (asp-glu-ala-his) box polypeptide 8, VPS72 - vacuolar protein sorting 72 homolog (s. cerevisiae), ELL - elongation factor rna polymerase ii, PNISR - pnn-interacting serine/arginine-rich protein, POLR3D - polymerase (rna) iii (dna directed) polypeptide d, 44kda, TCF12 - transcription factor 12, TCF20 - transcription factor 20 (ar1), FLI1 -…
GO:0034645	cellular macromolecule biosynthetic process	8.53e-10	2.35e-07	1.47	4383	724	846	206	[CCNK - cyclin k, ELL - elongation factor rna polymerase ii, TADA1 - transcriptional adaptor 1, POLR3D - polymerase (rna) iii (dna directed) polypeptide d, 44kda, NCOA5 - nuclear receptor coactivator 5, RFX5 - regulatory factor x, 5 (influences hla class ii expression), PATZ1 - poz (btb) and at hook containing zinc finger 1, TSC22D4 - tsc22 domain family, member 4, ELK3 - elk3, ets-domain protein…
GO:1901362	organic cyclic compound biosynthetic process	9.21e-10	2.48e-07	1.66	4383	819	435	135	[CCNK - cyclin k, DHX36 - deah (asp-glu-ala-his) box polypeptide 36, SYMPK - symplekin, POLR3D - polymerase (rna) iii (dna directed) polypeptide d, 44kda, TADA1 - transcriptional adaptor 1, ZEB1 - zinc finger e-box binding homeobox 1, SETDB1 - set domain, bifurcated 1, TCF12 - transcription factor 12, TSC22D4 - tsc22 domain family, member 4, TCF20 - transcription factor 20 (ar1), RELA - v-rel avi…
GO:0006397	mRNA processing	1.68e-09	4.4e-07	2.84	4383	146	455	43	[HNRNPUL1 - heterogeneous nuclear ribonucleoprotein u-like 1, DHX8 - deah (asp-glu-ala-his) box polypeptide 8, RBPMS - rna binding protein with multiple splicing, CSTF1 - cleavage stimulation factor, 3' pre-rna, subunit 1, 50kda, SYMPK - symplekin, HNRNPU - heterogeneous nuclear ribonucleoprotein u (scaffold attachment factor a), SUPT6H - suppressor of ty 6 homolog (s. cerevisiae), RBM26 - rna bi…
GO:0010604	positive regulation of macromolecule metabolic process	2.87e-09	7.34e-07	1.57	4383	882	483	153	[SMARCAD1 - swi/snf-related, matrix-associated actin-dependent regulator of chromatin, subfamily a, containing dead/h box 1, CCNK - cyclin k, ARAP1 - arfgap with rhogap domain, ankyrin repeat and ph domain 1, DHX36 - deah (asp-glu-ala-his) box polypeptide 36, SYMPK - symplekin, PARN - poly(a)-specific ribonuclease, FLT1 - fms-related tyrosine kinase 1, ZEB1 - zinc finger e-box binding homeobox 1,…
GO:0044446	intracellular organelle part	5.45e-09	9.61e-07	1.16	4383	2646	791	555	[ARAP1 - arfgap with rhogap domain, ankyrin repeat and ph domain 1, ELL - elongation factor rna polymerase ii, VEZT - vezatin, adherens junctions transmembrane protein, EXOSC10 - exosome component 10, SYMPK - symplekin, TADA1 - transcriptional adaptor 1, STARD3 - star-related lipid transfer (start) domain containing 3, CD2AP - cd2-associated protein, FAM73B - family with sequence similarity 73, m…
GO:0016569	covalent chromatin modification	3.96e-09	9.69e-07	2.09	4383	178	803	68	[SMARCAD1 - swi/snf-related, matrix-associated actin-dependent regulator of chromatin, subfamily a, containing dead/h box 1, VPS72 - vacuolar protein sorting 72 homolog (s. cerevisiae), CHD6 - chromodomain helicase dna binding protein 6, VPRBP - vpr (hiv-1) binding protein, DTX3L - deltex 3-like (drosophila), EPC2 - enhancer of polycomb homolog 2 (drosophila), TADA1 - transcriptional adaptor 1, E…
GO:0048518	positive regulation of biological process	3.89e-09	9.74e-07	1.41	4383	1497	448	215	[CCNK - cyclin k, SMARCAD1 - swi/snf-related, matrix-associated actin-dependent regulator of chromatin, subfamily a, containing dead/h box 1, MAPRE1 - microtubule-associated protein, rp/eb family, member 1, SYMPK - symplekin, POLR3D - polymerase (rna) iii (dna directed) polypeptide d, 44kda, AAMP - angio-associated, migratory cell protein, SPIRE1 - spire actin nucleation factor 1, CD2AP - cd2-ass…
GO:0005634	nucleus	1.28e-08	2e-06	1.3	4383	1323	835	327	[TOB1 - transducer of erbb2, 1, CCNK - cyclin k, BNIP3 - bcl2/adenovirus e1b 19kda interacting protein 3, EXOSC10 - exosome component 10, TADA1 - transcriptional adaptor 1, NCOA5 - nuclear receptor coactivator 5, TRAK1 - trafficking protein, kinesin binding 1, ANKRD11 - ankyrin repeat domain 11, RFX5 - regulatory factor x, 5 (influences hla class ii expression), PATZ1 - poz (btb) and at hook cont…
GO:0006357	regulation of transcription from RNA polymerase II promoter	8.88e-09	2.12e-06	1.79	4383	565	433	100	[CCNK - cyclin k, DHX36 - deah (asp-glu-ala-his) box polypeptide 36, TADA1 - transcriptional adaptor 1, ZEB1 - zinc finger e-box binding homeobox 1, TCF12 - transcription factor 12, TCF20 - transcription factor 20 (ar1), RELA - v-rel avian reticuloendotheliosis viral oncogene homolog a, SCAP - srebf chaperone, FLI1 - fli-1 proto-oncogene, ets transcription factor, BCOR - bcl6 corepressor, NCOR2 -…
GO:0043234	protein complex	1.66e-08	2.34e-06	1.34	4383	929	996	282	[TOB1 - transducer of erbb2, 1, CCNK - cyclin k, ELL - elongation factor rna polymerase ii, TADA1 - transcriptional adaptor 1, BCKDK - branched chain ketoacid dehydrogenase kinase, GDI1 - gdp dissociation inhibitor 1, CD2AP - cd2-associated protein, MKS1 - meckel syndrome, type 1, CORO1C - coronin, actin binding protein, 1c, RELA - v-rel avian reticuloendotheliosis viral oncogene homolog a, SCAP …
GO:0044424	intracellular part	2.26e-08	2.89e-06	1.06	4383	3804	968	892	[ARAP1 - arfgap with rhogap domain, ankyrin repeat and ph domain 1, ELL - elongation factor rna polymerase ii, VEZT - vezatin, adherens junctions transmembrane protein, EXOSC10 - exosome component 10, AGAP3 - arfgap with gtpase domain, ankyrin repeat and ph domain 3, KDELR1 - kdel (lys-asp-glu-leu) endoplasmic reticulum protein retention receptor 1, SYMPK - symplekin, TADA1 - transcriptional adap…
GO:0000398	mRNA splicing, via spliceosome	1.29e-08	2.95e-06	3.36	4383	86	455	30	[HNRNPUL1 - heterogeneous nuclear ribonucleoprotein u-like 1, DHX8 - deah (asp-glu-ala-his) box polypeptide 8, CSTF1 - cleavage stimulation factor, 3' pre-rna, subunit 1, 50kda, RBPMS - rna binding protein with multiple splicing, SYMPK - symplekin, HNRNPU - heterogeneous nuclear ribonucleoprotein u (scaffold attachment factor a), PRPF4B - prp4 pre-mrna processing factor 4 homolog b (yeast), PRCC …
GO:0000377	RNA splicing, via transesterification reactions with bulged adenosine as nucleophile	1.29e-08	3.01e-06	3.36	4383	86	455	30	[HNRNPUL1 - heterogeneous nuclear ribonucleoprotein u-like 1, DHX8 - deah (asp-glu-ala-his) box polypeptide 8, CSTF1 - cleavage stimulation factor, 3' pre-rna, subunit 1, 50kda, RBPMS - rna binding protein with multiple splicing, SYMPK - symplekin, HNRNPU - heterogeneous nuclear ribonucleoprotein u (scaffold attachment factor a), PRPF4B - prp4 pre-mrna processing factor 4 homolog b (yeast), PRCC …
GO:0010628	positive regulation of gene expression	1.67e-08	3.73e-06	1.82	4383	534	425	94	[CCNK - cyclin k, SMARCAD1 - swi/snf-related, matrix-associated actin-dependent regulator of chromatin, subfamily a, containing dead/h box 1, DHX36 - deah (asp-glu-ala-his) box polypeptide 36, NSD1 - nuclear receptor binding set domain protein 1, ZEB1 - zinc finger e-box binding homeobox 1, TCF12 - transcription factor 12, INPP5K - inositol polyphosphate-5-phosphatase k, TCF20 - transcription fac…
GO:0048522	positive regulation of cellular process	1.84e-08	4.05e-06	1.46	4383	1354	381	172	[SMARCAD1 - swi/snf-related, matrix-associated actin-dependent regulator of chromatin, subfamily a, containing dead/h box 1, CCNK - cyclin k, MAPRE1 - microtubule-associated protein, rp/eb family, member 1, DHX36 - deah (asp-glu-ala-his) box polypeptide 36, SYMPK - symplekin, PARN - poly(a)-specific ribonuclease, AAMP - angio-associated, migratory cell protein, SETDB1 - set domain, bifurcated 1, …
GO:0010557	positive regulation of macromolecule biosynthetic process	1.92e-08	4.14e-06	1.85	4383	493	428	89	[CCNK - cyclin k, SMARCAD1 - swi/snf-related, matrix-associated actin-dependent regulator of chromatin, subfamily a, containing dead/h box 1, DHX36 - deah (asp-glu-ala-his) box polypeptide 36, PARN - poly(a)-specific ribonuclease, NSD1 - nuclear receptor binding set domain protein 1, ZEB1 - zinc finger e-box binding homeobox 1, TCF12 - transcription factor 12, INPP5K - inositol polyphosphate-5-ph…
GO:0009893	positive regulation of metabolic process	2.44e-08	5.04e-06	1.52	4383	945	483	158	[SMARCAD1 - swi/snf-related, matrix-associated actin-dependent regulator of chromatin, subfamily a, containing dead/h box 1, CCNK - cyclin k, ARAP1 - arfgap with rhogap domain, ankyrin repeat and ph domain 1, DHX36 - deah (asp-glu-ala-his) box polypeptide 36, SYMPK - symplekin, PARN - poly(a)-specific ribonuclease, FLT1 - fms-related tyrosine kinase 1, ZEB1 - zinc finger e-box binding homeobox 1,…
GO:0000375	RNA splicing, via transesterification reactions	2.39e-08	5.05e-06	3.28	4383	88	455	30	[HNRNPUL1 - heterogeneous nuclear ribonucleoprotein u-like 1, DHX8 - deah (asp-glu-ala-his) box polypeptide 8, CSTF1 - cleavage stimulation factor, 3' pre-rna, subunit 1, 50kda, RBPMS - rna binding protein with multiple splicing, SYMPK - symplekin, HNRNPU - heterogeneous nuclear ribonucleoprotein u (scaffold attachment factor a), PRPF4B - prp4 pre-mrna processing factor 4 homolog b (yeast), PRCC …
GO:0043412	macromolecule modification	3.22e-08	6.42e-06	1.42	4383	1061	594	204	[CCNK - cyclin k, SMARCAD1 - swi/snf-related, matrix-associated actin-dependent regulator of chromatin, subfamily a, containing dead/h box 1, TADA1 - transcriptional adaptor 1, AARS - alanyl-trna synthetase, TRAK1 - trafficking protein, kinesin binding 1, BCOR - bcl6 corepressor, C16orf80 - chromosome 16 open reading frame 80, SIRT2 - sirtuin 2, DCAF5 - ddb1 and cul4 associated factor 5, HDAC3 - …
GO:0044238	primary metabolic process	3.18e-08	6.44e-06	1.21	4383	2408	596	395	[ELL - elongation factor rna polymerase ii, EXOSC10 - exosome component 10, SYMPK - symplekin, TADA1 - transcriptional adaptor 1, NCOA5 - nuclear receptor coactivator 5, STARD3 - star-related lipid transfer (start) domain containing 3, AARS - alanyl-trna synthetase, CD2AP - cd2-associated protein, NCOR2 - nuclear receptor corepressor 2, PANK2 - pantothenate kinase 2, SMPD4 - sphingomyelin phospho…
GO:0065007	biological regulation	3.52e-08	6.88e-06	1.18	4383	2819	518	393	[ARAP1 - arfgap with rhogap domain, ankyrin repeat and ph domain 1, EXOSC10 - exosome component 10, AGAP3 - arfgap with gtpase domain, ankyrin repeat and ph domain 3, SYMPK - symplekin, TADA1 - transcriptional adaptor 1, NCOA5 - nuclear receptor coactivator 5, AAMP - angio-associated, migratory cell protein, STARD3 - star-related lipid transfer (start) domain containing 3, AARS - alanyl-trna synt…
GO:0044422	organelle part	6.13e-08	7.2e-06	1.15	4383	2686	791	557	[ARAP1 - arfgap with rhogap domain, ankyrin repeat and ph domain 1, ELL - elongation factor rna polymerase ii, VEZT - vezatin, adherens junctions transmembrane protein, EXOSC10 - exosome component 10, SYMPK - symplekin, TADA1 - transcriptional adaptor 1, STARD3 - star-related lipid transfer (start) domain containing 3, CD2AP - cd2-associated protein, FAM73B - family with sequence similarity 73, m…
GO:1902680	positive regulation of RNA biosynthetic process	4.86e-08	9.34e-06	1.89	4383	436	425	80	[CCNK - cyclin k, SMARCAD1 - swi/snf-related, matrix-associated actin-dependent regulator of chromatin, subfamily a, containing dead/h box 1, DHX36 - deah (asp-glu-ala-his) box polypeptide 36, NSD1 - nuclear receptor binding set domain protein 1, ZEB1 - zinc finger e-box binding homeobox 1, TCF12 - transcription factor 12, INPP5K - inositol polyphosphate-5-phosphatase k, TCF20 - transcription fac…
GO:0008380	RNA splicing	6.76e-08	1.28e-05	2.82	4383	123	455	36	[HNRNPUL1 - heterogeneous nuclear ribonucleoprotein u-like 1, DHX8 - deah (asp-glu-ala-his) box polypeptide 8, RBPMS - rna binding protein with multiple splicing, CSTF1 - cleavage stimulation factor, 3' pre-rna, subunit 1, 50kda, SYMPK - symplekin, HNRNPU - heterogeneous nuclear ribonucleoprotein u (scaffold attachment factor a), SUPT6H - suppressor of ty 6 homolog (s. cerevisiae), PRPF4B - prp4 …
GO:0051254	positive regulation of RNA metabolic process	7.28e-08	1.35e-05	1.85	4383	463	425	83	[CCNK - cyclin k, SMARCAD1 - swi/snf-related, matrix-associated actin-dependent regulator of chromatin, subfamily a, containing dead/h box 1, DHX36 - deah (asp-glu-ala-his) box polypeptide 36, NSD1 - nuclear receptor binding set domain protein 1, ZEB1 - zinc finger e-box binding homeobox 1, TCF12 - transcription factor 12, INPP5K - inositol polyphosphate-5-phosphatase k, TCF20 - transcription fac…
GO:1903508	positive regulation of nucleic acid-templated transcription	1.01e-07	1.81e-05	1.87	4383	435	425	79	[SMARCAD1 - swi/snf-related, matrix-associated actin-dependent regulator of chromatin, subfamily a, containing dead/h box 1, CCNK - cyclin k, DHX36 - deah (asp-glu-ala-his) box polypeptide 36, NSD1 - nuclear receptor binding set domain protein 1, ZEB1 - zinc finger e-box binding homeobox 1, TCF12 - transcription factor 12, INPP5K - inositol polyphosphate-5-phosphatase k, TCF20 - transcription fac…
GO:0045893	positive regulation of transcription, DNA-templated	1.01e-07	1.84e-05	1.87	4383	435	425	79	[CCNK - cyclin k, SMARCAD1 - swi/snf-related, matrix-associated actin-dependent regulator of chromatin, subfamily a, containing dead/h box 1, DHX36 - deah (asp-glu-ala-his) box polypeptide 36, NSD1 - nuclear receptor binding set domain protein 1, ZEB1 - zinc finger e-box binding homeobox 1, TCF12 - transcription factor 12, INPP5K - inositol polyphosphate-5-phosphatase k, TCF20 - transcription fac…
GO:0051173	positive regulation of nitrogen compound metabolic process	1.06e-07	1.86e-05	1.57	4383	847	428	130	[CCNK - cyclin k, SMARCAD1 - swi/snf-related, matrix-associated actin-dependent regulator of chromatin, subfamily a, containing dead/h box 1, DHX36 - deah (asp-glu-ala-his) box polypeptide 36, SYMPK - symplekin, PARN - poly(a)-specific ribonuclease, SETDB1 - set domain, bifurcated 1, ZEB1 - zinc finger e-box binding homeobox 1, FLT1 - fms-related tyrosine kinase 1, TCF12 - transcription factor 12…
GO:0016570	histone modification	1.13e-07	1.97e-05	2.79	4383	136	416	36	[SMARCAD1 - swi/snf-related, matrix-associated actin-dependent regulator of chromatin, subfamily a, containing dead/h box 1, VPRBP - vpr (hiv-1) binding protein, DTX3L - deltex 3-like (drosophila), EPC2 - enhancer of polycomb homolog 2 (drosophila), TADA1 - transcriptional adaptor 1, EHMT1 - euchromatic histone-lysine n-methyltransferase 1, MCRS1 - microspherule protein 1, NSD1 - nuclear receptor…
GO:0031325	positive regulation of cellular metabolic process	1.22e-07	2.09e-05	1.6	4383	885	371	120	[CCNK - cyclin k, SMARCAD1 - swi/snf-related, matrix-associated actin-dependent regulator of chromatin, subfamily a, containing dead/h box 1, DHX36 - deah (asp-glu-ala-his) box polypeptide 36, SYMPK - symplekin, PARN - poly(a)-specific ribonuclease, ZEB1 - zinc finger e-box binding homeobox 1, FLT1 - fms-related tyrosine kinase 1, SETDB1 - set domain, bifurcated 1, TCF12 - transcription factor 12…
GO:1990234	transferase complex	2.05e-07	2.23e-05	1.72	4383	251	892	88	[CCNK - cyclin k, KLHL42 - kelch-like family member 42, MED7 - mediator complex subunit 7, CHD6 - chromodomain helicase dna binding protein 6, EPC2 - enhancer of polycomb homolog 2 (drosophila), TADA1 - transcriptional adaptor 1, POLR3D - polymerase (rna) iii (dna directed) polypeptide d, 44kda, MCRS1 - microspherule protein 1, KBTBD2 - kelch repeat and btb (poz) domain containing 2, ZER1 - zyg-1…
GO:0044237	cellular metabolic process	1.4e-07	2.35e-05	1.18	4383	2465	651	433	[ELL - elongation factor rna polymerase ii, EXOSC10 - exosome component 10, SYMPK - symplekin, TADA1 - transcriptional adaptor 1, NCOA5 - nuclear receptor coactivator 5, STARD3 - star-related lipid transfer (start) domain containing 3, AARS - alanyl-trna synthetase, CD2AP - cd2-associated protein, NCOR2 - nuclear receptor corepressor 2, COX15 - cytochrome c oxidase assembly homolog 15 (yeast), PA…
GO:0005488	binding	6.13e-08	2.9e-05	1.08	4383	3665	747	675	[ARAP1 - arfgap with rhogap domain, ankyrin repeat and ph domain 1, ELL - elongation factor rna polymerase ii, VEZT - vezatin, adherens junctions transmembrane protein, EXOSC10 - exosome component 10, AGAP3 - arfgap with gtpase domain, ankyrin repeat and ph domain 3, SYMPK - symplekin, NCOA5 - nuclear receptor coactivator 5, AAMP - angio-associated, migratory cell protein, STARD3 - star-related l…
GO:0045934	negative regulation of nucleobase-containing compound metabolic process	2.66e-07	4.41e-05	1.92	4383	400	399	70	[DHX36 - deah (asp-glu-ala-his) box polypeptide 36, VPRBP - vpr (hiv-1) binding protein, EHMT1 - euchromatic histone-lysine n-methyltransferase 1, PARN - poly(a)-specific ribonuclease, NSD1 - nuclear receptor binding set domain protein 1, STRN3 - striatin, calmodulin binding protein 3, ZEB1 - zinc finger e-box binding homeobox 1, FBXW7 - f-box and wd repeat domain containing 7, e3 ubiquitin prote…
GO:0003677	DNA binding	1.11e-07	4.52e-05	1.84	4383	550	355	82	[SMARCAD1 - swi/snf-related, matrix-associated actin-dependent regulator of chromatin, subfamily a, containing dead/h box 1, DHX36 - deah (asp-glu-ala-his) box polypeptide 36, POLR3D - polymerase (rna) iii (dna directed) polypeptide d, 44kda, NSD1 - nuclear receptor binding set domain protein 1, ZEB1 - zinc finger e-box binding homeobox 1, SETDB1 - set domain, bifurcated 1, TCF12 - transcription …
GO:0043232	intracellular non-membrane-bounded organelle	6.87e-07	6.45e-05	1.43	4383	709	749	173	[DHX9 - deah (asp-glu-ala-his) box helicase 9, MAPRE1 - microtubule-associated protein, rp/eb family, member 1, EXOSC10 - exosome component 10, SYMPK - symplekin, PARN - poly(a)-specific ribonuclease, NCOA5 - nuclear receptor coactivator 5, AAMP - angio-associated, migratory cell protein, FLT1 - fms-related tyrosine kinase 1, SETDB1 - set domain, bifurcated 1, SPIRE1 - spire actin nucleation fact…
GO:0043229	intracellular organelle	7.36e-07	6.48e-05	1.13	4383	2613	891	602	[ZMYND8 - zinc finger, mynd-type containing 8, ARAP1 - arfgap with rhogap domain, ankyrin repeat and ph domain 1, VEZT - vezatin, adherens junctions transmembrane protein, EXOSC10 - exosome component 10, KDELR1 - kdel (lys-asp-glu-leu) endoplasmic reticulum protein retention receptor 1, SYMPK - symplekin, TADA1 - transcriptional adaptor 1, NCOA5 - nuclear receptor coactivator 5, AAMP - angio-asso…
GO:0043228	non-membrane-bounded organelle	6.87e-07	6.91e-05	1.43	4383	709	749	173	[DHX9 - deah (asp-glu-ala-his) box helicase 9, MAPRE1 - microtubule-associated protein, rp/eb family, member 1, EXOSC10 - exosome component 10, SYMPK - symplekin, PARN - poly(a)-specific ribonuclease, AAMP - angio-associated, migratory cell protein, NCOA5 - nuclear receptor coactivator 5, SETDB1 - set domain, bifurcated 1, FLT1 - fms-related tyrosine kinase 1, SPIRE1 - spire actin nucleation fact…
GO:0018205	peptidyl-lysine modification	5.19e-07	8.46e-05	2.08	4383	107	963	49	[EPC2 - enhancer of polycomb homolog 2 (drosophila), EHMT1 - euchromatic histone-lysine n-methyltransferase 1, TADA1 - transcriptional adaptor 1, NSD1 - nuclear receptor binding set domain protein 1, NUP133 - nucleoporin 133kda, MCRS1 - microspherule protein 1, SETDB1 - set domain, bifurcated 1, NAA40 - n(alpha)-acetyltransferase 40, natd catalytic subunit, homolog (s. cerevisiae), MTA1 - metasta…
GO:0071704	organic substance metabolic process	5.6e-07	8.86e-05	1.2	4383	2510	474	327	[CCNK - cyclin k, SMARCAD1 - swi/snf-related, matrix-associated actin-dependent regulator of chromatin, subfamily a, containing dead/h box 1, EXOSC10 - exosome component 10, SYMPK - symplekin, POLR3D - polymerase (rna) iii (dna directed) polypeptide d, 44kda, TADA1 - transcriptional adaptor 1, NCOA5 - nuclear receptor coactivator 5, STARD3 - star-related lipid transfer (start) domain containing 3…
GO:0009891	positive regulation of biosynthetic process	5.52e-07	8.87e-05	1.72	4383	535	428	90	[CCNK - cyclin k, SMARCAD1 - swi/snf-related, matrix-associated actin-dependent regulator of chromatin, subfamily a, containing dead/h box 1, DHX36 - deah (asp-glu-ala-his) box polypeptide 36, PARN - poly(a)-specific ribonuclease, NSD1 - nuclear receptor binding set domain protein 1, ZEB1 - zinc finger e-box binding homeobox 1, TCF12 - transcription factor 12, INPP5K - inositol polyphosphate-5-ph…
GO:0031328	positive regulation of cellular biosynthetic process	6.46e-07	0.000101	1.73	4383	528	428	89	[CCNK - cyclin k, SMARCAD1 - swi/snf-related, matrix-associated actin-dependent regulator of chromatin, subfamily a, containing dead/h box 1, DHX36 - deah (asp-glu-ala-his) box polypeptide 36, PARN - poly(a)-specific ribonuclease, NSD1 - nuclear receptor binding set domain protein 1, ZEB1 - zinc finger e-box binding homeobox 1, TCF12 - transcription factor 12, INPP5K - inositol polyphosphate-5-ph…
GO:0044267	cellular protein metabolic process	7.82e-07	0.00012	1.39	4383	1049	578	192	[SMARCAD1 - swi/snf-related, matrix-associated actin-dependent regulator of chromatin, subfamily a, containing dead/h box 1, CCNK - cyclin k, BNIP3 - bcl2/adenovirus e1b 19kda interacting protein 3, DTX3L - deltex 3-like (drosophila), TMEM165 - transmembrane protein 165, TADA1 - transcriptional adaptor 1, KBTBD2 - kelch repeat and btb (poz) domain containing 2, SETDB1 - set domain, bifurcated 1, …
GO:0045935	positive regulation of nucleobase-containing compound metabolic process	9.29e-07	0.000141	1.79	4383	524	370	79	[CCNK - cyclin k, SMARCAD1 - swi/snf-related, matrix-associated actin-dependent regulator of chromatin, subfamily a, containing dead/h box 1, DHX36 - deah (asp-glu-ala-his) box polypeptide 36, PARN - poly(a)-specific ribonuclease, NSD1 - nuclear receptor binding set domain protein 1, SETDB1 - set domain, bifurcated 1, ZEB1 - zinc finger e-box binding homeobox 1, TCF12 - transcription factor 12, I…
GO:0036211	protein modification process	9.74e-07	0.000144	1.4	4383	978	578	181	[SMARCAD1 - swi/snf-related, matrix-associated actin-dependent regulator of chromatin, subfamily a, containing dead/h box 1, CCNK - cyclin k, DTX3L - deltex 3-like (drosophila), TMEM165 - transmembrane protein 165, TADA1 - transcriptional adaptor 1, KBTBD2 - kelch repeat and btb (poz) domain containing 2, SETDB1 - set domain, bifurcated 1, FLT1 - fms-related tyrosine kinase 1, TRAK1 - trafficking…
GO:0006464	cellular protein modification process	9.74e-07	0.000146	1.4	4383	978	578	181	[SMARCAD1 - swi/snf-related, matrix-associated actin-dependent regulator of chromatin, subfamily a, containing dead/h box 1, CCNK - cyclin k, TMEM165 - transmembrane protein 165, DTX3L - deltex 3-like (drosophila), TADA1 - transcriptional adaptor 1, KBTBD2 - kelch repeat and btb (poz) domain containing 2, FLT1 - fms-related tyrosine kinase 1, SETDB1 - set domain, bifurcated 1, TRAK1 - trafficking…
GO:0070035	purine NTP-dependent helicase activity	7.41e-07	0.000234	2.81	4383	41	951	25	[DHX9 - deah (asp-glu-ala-his) box helicase 9, DHX36 - deah (asp-glu-ala-his) box polypeptide 36, DHX8 - deah (asp-glu-ala-his) box polypeptide 8, DDX41 - dead (asp-glu-ala-asp) box polypeptide 41, ERCC3 - excision repair cross-complementing rodent repair deficiency, complementation group 3, DHX32 - deah (asp-glu-ala-his) box polypeptide 32, DHX30 - deah (asp-glu-ala-his) box helicase 30, SKIV2L2…
GO:0003682	chromatin binding	8.98e-07	0.000255	2.47	4383	153	453	39	[CCNT2 - cyclin t2, NIPBL - nipped-b homolog (drosophila), POLR3D - polymerase (rna) iii (dna directed) polypeptide d, 44kda, NCOA5 - nuclear receptor coactivator 5, NSD1 - nuclear receptor binding set domain protein 1, SETDB1 - set domain, bifurcated 1, ZEB1 - zinc finger e-box binding homeobox 1, DHX30 - deah (asp-glu-ala-his) box helicase 30, BAHD1 - bromo adjacent homology domain containing 1…
GO:0005694	chromosome	3.15e-06	0.000261	2.52	4383	65	803	30	[EHMT1 - euchromatic histone-lysine n-methyltransferase 1, NSD1 - nuclear receptor binding set domain protein 1, SETDB1 - set domain, bifurcated 1, NCAPD2 - non-smc condensin i complex, subunit d2, ZMYND11 - zinc finger, mynd-type containing 11, SMC3 - structural maintenance of chromosomes 3, FBXO11 - f-box protein 11, PDS5A - pds5, regulator of cohesion maintenance, homolog a (s. cerevisiae), PR…
GO:0008026	ATP-dependent helicase activity	7.41e-07	0.000263	2.81	4383	41	951	25	[DHX9 - deah (asp-glu-ala-his) box helicase 9, DHX8 - deah (asp-glu-ala-his) box polypeptide 8, DHX36 - deah (asp-glu-ala-his) box polypeptide 36, DDX41 - dead (asp-glu-ala-asp) box polypeptide 41, ERCC3 - excision repair cross-complementing rodent repair deficiency, complementation group 3, DHX32 - deah (asp-glu-ala-his) box polypeptide 32, DHX30 - deah (asp-glu-ala-his) box helicase 30, SKIV2L2…
GO:0003724	RNA helicase activity	1.26e-06	0.000276	3.02	4383	32	951	21	[DHX9 - deah (asp-glu-ala-his) box helicase 9, EIF4A1 - eukaryotic translation initiation factor 4a1, DHX36 - deah (asp-glu-ala-his) box polypeptide 36, DHX8 - deah (asp-glu-ala-his) box polypeptide 8, DDX41 - dead (asp-glu-ala-asp) box polypeptide 41, SKIV2L - superkiller viralicidic activity 2-like (s. cerevisiae), DHX32 - deah (asp-glu-ala-his) box polypeptide 32, DHX30 - deah (asp-glu-ala-his…
GO:0009892	negative regulation of metabolic process	2e-06	0.00029	1.56	4383	782	410	114	[DHX36 - deah (asp-glu-ala-his) box polypeptide 36, PARN - poly(a)-specific ribonuclease, ZEB1 - zinc finger e-box binding homeobox 1, TNRC6A - trinucleotide repeat containing 6a, INPP5K - inositol polyphosphate-5-phosphatase k, TSC22D4 - tsc22 domain family, member 4, RELA - v-rel avian reticuloendotheliosis viral oncogene homolog a, SCAP - srebf chaperone, BCOR - bcl6 corepressor, IQGAP1 - iq m…
GO:0008186	RNA-dependent ATPase activity	1.26e-06	0.000299	3.02	4383	32	951	21	[DHX9 - deah (asp-glu-ala-his) box helicase 9, EIF4A1 - eukaryotic translation initiation factor 4a1, DHX36 - deah (asp-glu-ala-his) box polypeptide 36, DHX8 - deah (asp-glu-ala-his) box polypeptide 8, DDX41 - dead (asp-glu-ala-asp) box polypeptide 41, SKIV2L - superkiller viralicidic activity 2-like (s. cerevisiae), DHX32 - deah (asp-glu-ala-his) box polypeptide 32, DHX30 - deah (asp-glu-ala-his…
GO:0004004	ATP-dependent RNA helicase activity	1.26e-06	0.000326	3.02	4383	32	951	21	[DHX9 - deah (asp-glu-ala-his) box helicase 9, EIF4A1 - eukaryotic translation initiation factor 4a1, DHX8 - deah (asp-glu-ala-his) box polypeptide 8, DHX36 - deah (asp-glu-ala-his) box polypeptide 36, DDX41 - dead (asp-glu-ala-asp) box polypeptide 41, SKIV2L - superkiller viralicidic activity 2-like (s. cerevisiae), DHX32 - deah (asp-glu-ala-his) box polypeptide 32, DHX30 - deah (asp-glu-ala-his…
GO:0051253	negative regulation of RNA metabolic process	2.45e-06	0.000352	1.91	4383	357	399	62	[DHX36 - deah (asp-glu-ala-his) box polypeptide 36, VPRBP - vpr (hiv-1) binding protein, PARN - poly(a)-specific ribonuclease, EHMT1 - euchromatic histone-lysine n-methyltransferase 1, NSD1 - nuclear receptor binding set domain protein 1, ZEB1 - zinc finger e-box binding homeobox 1, STRN3 - striatin, calmodulin binding protein 3, INPP5K - inositol polyphosphate-5-phosphatase k, XPO1 - exportin 1 …
GO:0010629	negative regulation of gene expression	2.89e-06	0.000408	1.77	4383	473	399	76	[VPRBP - vpr (hiv-1) binding protein, EHMT1 - euchromatic histone-lysine n-methyltransferase 1, PARN - poly(a)-specific ribonuclease, NSD1 - nuclear receptor binding set domain protein 1, STRN3 - striatin, calmodulin binding protein 3, ZEB1 - zinc finger e-box binding homeobox 1, TNRC6A - trinucleotide repeat containing 6a, INPP5K - inositol polyphosphate-5-phosphatase k, XPO1 - exportin 1 (crm1 …
GO:1903322	positive regulation of protein modification by small protein conjugation or removal	3.44e-06	0.00048	3.17	4383	68	468	23	[PIAS1 - protein inhibitor of activated stat, 1, PSMD11 - proteasome (prosome, macropain) 26s subunit, non-atpase, 11, AXIN1 - axin 1, PSMD13 - proteasome (prosome, macropain) 26s subunit, non-atpase, 13, CDK9 - cyclin-dependent kinase 9, RNF111 - ring finger protein 111, PIAS4 - protein inhibitor of activated stat, 4, PIAS3 - protein inhibitor of activated stat, 3, FBXW7 - f-box and wd repeat do…
GO:0071013	catalytic step 2 spliceosome	6.57e-06	0.000514	3.05	4383	31	880	19	[DHX8 - deah (asp-glu-ala-his) box polypeptide 8, TEP1 - telomerase-associated protein 1, DDX41 - dead (asp-glu-ala-asp) box polypeptide 41, NRDE2 - nrde-2, necessary for rna interference, domain containing, XAB2 - xpa binding protein 2, PLRG1 - pleiotropic regulator 1, DGCR14 - digeorge syndrome critical region gene 14, SKIV2L2 - superkiller viralicidic activity 2-like 2 (s. cerevisiae), HNRNPU …
GO:0019899	enzyme binding	2.76e-06	0.000523	1.57	4383	632	486	110	[CCNK - cyclin k, DHX36 - deah (asp-glu-ala-his) box polypeptide 36, PARN - poly(a)-specific ribonuclease, TBC1D15 - tbc1 domain family, member 15, RELA - v-rel avian reticuloendotheliosis viral oncogene homolog a, NCOR2 - nuclear receptor corepressor 2, BCOR - bcl6 corepressor, IQGAP1 - iq motif containing gtpase activating protein 1, PTPN23 - protein tyrosine phosphatase, non-receptor type 23, …
GO:0004386	helicase activity	2.64e-06	0.000536	2.42	4383	59	951	31	[SMARCAD1 - swi/snf-related, matrix-associated actin-dependent regulator of chromatin, subfamily a, containing dead/h box 1, DHX9 - deah (asp-glu-ala-his) box helicase 9, DHX36 - deah (asp-glu-ala-his) box polypeptide 36, DHX8 - deah (asp-glu-ala-his) box polypeptide 8, CHD6 - chromodomain helicase dna binding protein 6, DDX41 - dead (asp-glu-ala-asp) box polypeptide 41, ERCC3 - excision repair c…
GO:0010605	negative regulation of macromolecule metabolic process	3.93e-06	0.000541	1.63	4383	715	354	94	[DHX36 - deah (asp-glu-ala-his) box polypeptide 36, VPRBP - vpr (hiv-1) binding protein, EHMT1 - euchromatic histone-lysine n-methyltransferase 1, PARN - poly(a)-specific ribonuclease, NSD1 - nuclear receptor binding set domain protein 1, STRN3 - striatin, calmodulin binding protein 3, ZEB1 - zinc finger e-box binding homeobox 1, TNRC6A - trinucleotide repeat containing 6a, FBXW7 - f-box and wd r…
GO:0051052	regulation of DNA metabolic process	4.47e-06	0.000608	8.09	4383	126	43	10	[DHX36 - deah (asp-glu-ala-his) box polypeptide 36, PPARGC1A - peroxisome proliferator-activated receptor gamma, coactivator 1 alpha, SMG6 - smg6 nonsense mediated mrna decay factor, ANKRD17 - ankyrin repeat domain 17, STAG2 - stromal antigen 2, NAT10 - n-acetyltransferase 10 (gcn5-related), PRMT5 - protein arginine methyltransferase 5, FBXW7 - f-box and wd repeat domain containing 7, e3 ubiquiti…
GO:0043231	intracellular membrane-bounded organelle	8.22e-06	0.00061	1.14	4383	2178	989	561	[ZMYND8 - zinc finger, mynd-type containing 8, ARAP1 - arfgap with rhogap domain, ankyrin repeat and ph domain 1, SPTAN1 - spectrin, alpha, non-erythrocytic 1, EXOSC10 - exosome component 10, KDELR1 - kdel (lys-asp-glu-leu) endoplasmic reticulum protein retention receptor 1, TADA1 - transcriptional adaptor 1, NCOA5 - nuclear receptor coactivator 5, STARD3 - star-related lipid transfer (start) dom…
GO:0033043	regulation of organelle organization	5.04e-06	0.000669	1.68	4383	408	538	84	[ARAP1 - arfgap with rhogap domain, ankyrin repeat and ph domain 1, DHX36 - deah (asp-glu-ala-his) box polypeptide 36, MAPRE1 - microtubule-associated protein, rp/eb family, member 1, BNIP3 - bcl2/adenovirus e1b 19kda interacting protein 3, RHOD - ras homolog family member d, ARHGEF15 - rho guanine nucleotide exchange factor (gef) 15, EXOSC10 - exosome component 10, PARN - poly(a)-specific ribonu…
GO:0045944	positive regulation of transcription from RNA polymerase II promoter	5e-06	0.000672	1.96	4383	332	370	55	[CCNK - cyclin k, DHX36 - deah (asp-glu-ala-his) box polypeptide 36, ZEB1 - zinc finger e-box binding homeobox 1, TCF12 - transcription factor 12, TCF20 - transcription factor 20 (ar1), RELA - v-rel avian reticuloendotheliosis viral oncogene homolog a, SUPT6H - suppressor of ty 6 homolog (s. cerevisiae), FLI1 - fli-1 proto-oncogene, ets transcription factor, SUPT5H - suppressor of ty 5 homolog (s…
GO:0010558	negative regulation of macromolecule biosynthetic process	6.13e-06	0.000804	1.81	4383	407	399	67	[VPRBP - vpr (hiv-1) binding protein, EHMT1 - euchromatic histone-lysine n-methyltransferase 1, NSD1 - nuclear receptor binding set domain protein 1, STRN3 - striatin, calmodulin binding protein 3, ZEB1 - zinc finger e-box binding homeobox 1, TNRC6A - trinucleotide repeat containing 6a, FBXW7 - f-box and wd repeat domain containing 7, e3 ubiquitin protein ligase, INPP5K - inositol polyphosphate-5…
GO:0044249	cellular biosynthetic process	6.64e-06	0.00086	1.41	4383	1111	428	153	[CCNK - cyclin k, DHX36 - deah (asp-glu-ala-his) box polypeptide 36, SYMPK - symplekin, POLR3D - polymerase (rna) iii (dna directed) polypeptide d, 44kda, TADA1 - transcriptional adaptor 1, ZEB1 - zinc finger e-box binding homeobox 1, SETDB1 - set domain, bifurcated 1, TCF12 - transcription factor 12, INPP5K - inositol polyphosphate-5-phosphatase k, TSC22D4 - tsc22 domain family, member 4, STARD7…
GO:0048519	negative regulation of biological process	6.84e-06	0.000876	1.34	4383	1357	469	194	[ARAP1 - arfgap with rhogap domain, ankyrin repeat and ph domain 1, CCNK - cyclin k, MAPRE1 - microtubule-associated protein, rp/eb family, member 1, NCOA5 - nuclear receptor coactivator 5, AARS - alanyl-trna synthetase, CD2AP - cd2-associated protein, TSC22D4 - tsc22 domain family, member 4, RELA - v-rel avian reticuloendotheliosis viral oncogene homolog a, SCAP - srebf chaperone, IQGAP1 - iq mo…
GO:0070647	protein modification by small protein conjugation or removal	7.05e-06	0.000892	1.73	4383	327	574	74	[VPRBP - vpr (hiv-1) binding protein, DTX3L - deltex 3-like (drosophila), NUP133 - nucleoporin 133kda, MCRS1 - microspherule protein 1, KBTBD2 - kelch repeat and btb (poz) domain containing 2, ZER1 - zyg-11 related, cell cycle regulator, FBXW7 - f-box and wd repeat domain containing 7, e3 ubiquitin protein ligase, RNF25 - ring finger protein 25, FBXO11 - f-box protein 11, RNF121 - ring finger pro…
GO:0009301	snRNA transcription	8.21e-06	0.001	3.35	4383	29	768	17	[CCNK - cyclin k, RPRD1B - regulation of nuclear pre-mrna domain containing 1b, ELL - elongation factor rna polymerase ii, INTS9 - integrator complex subunit 9, CCNT2 - cyclin t2, CDK9 - cyclin-dependent kinase 9, VWA9 - von willebrand factor a domain containing 9, SRRT - serrate rna effector molecule homolog (arabidopsis), CDK7 - cyclin-dependent kinase 7, RPRD2 - regulation of nuclear pre-mrna …
GO:0042795	snRNA transcription from RNA polymerase II promoter	8.21e-06	0.00101	3.35	4383	29	768	17	[CCNK - cyclin k, ELL - elongation factor rna polymerase ii, RPRD1B - regulation of nuclear pre-mrna domain containing 1b, INTS9 - integrator complex subunit 9, CCNT2 - cyclin t2, CDK9 - cyclin-dependent kinase 9, VWA9 - von willebrand factor a domain containing 9, SRRT - serrate rna effector molecule homolog (arabidopsis), CDK7 - cyclin-dependent kinase 7, RPRD2 - regulation of nuclear pre-mrna …
GO:2001251	negative regulation of chromosome organization	8.14e-06	0.00102	4.09	4383	34	473	15	[MTF2 - metal response element binding transcription factor 2, EXOSC10 - exosome component 10, ZNF451 - zinc finger protein 451, NAT10 - n-acetyltransferase 10 (gcn5-related), XRCC1 - x-ray repair complementing defective repair in chinese hamster cells 1, KDM4A - lysine (k)-specific demethylase 4a, HNRNPU - heterogeneous nuclear ribonucleoprotein u (scaffold attachment factor a), SUPT6H - suppres…
GO:2000113	negative regulation of cellular macromolecule biosynthetic process	9.5e-06	0.00115	1.81	4383	395	399	65	[VPRBP - vpr (hiv-1) binding protein, EHMT1 - euchromatic histone-lysine n-methyltransferase 1, NSD1 - nuclear receptor binding set domain protein 1, STRN3 - striatin, calmodulin binding protein 3, ZEB1 - zinc finger e-box binding homeobox 1, TNRC6A - trinucleotide repeat containing 6a, FBXW7 - f-box and wd repeat domain containing 7, e3 ubiquitin protein ligase, INPP5K - inositol polyphosphate-5…
GO:0032446	protein modification by small protein conjugation	1.04e-05	0.00124	1.81	4383	261	574	62	[VPRBP - vpr (hiv-1) binding protein, DTX3L - deltex 3-like (drosophila), NUP133 - nucleoporin 133kda, KBTBD2 - kelch repeat and btb (poz) domain containing 2, ZER1 - zyg-11 related, cell cycle regulator, FBXW7 - f-box and wd repeat domain containing 7, e3 ubiquitin protein ligase, RNF25 - ring finger protein 25, RNF121 - ring finger protein 121, FBXO11 - f-box protein 11, ASB6 - ankyrin repeat a…
GO:0005829	cytosol	2.01e-05	0.00142	1.33	4383	1533	386	179	[MAPRE1 - microtubule-associated protein, rp/eb family, member 1, DHX36 - deah (asp-glu-ala-his) box polypeptide 36, VEZT - vezatin, adherens junctions transmembrane protein, PNISR - pnn-interacting serine/arginine-rich protein, DTX3L - deltex 3-like (drosophila), SYMPK - symplekin, POLR3D - polymerase (rna) iii (dna directed) polypeptide d, 44kda, PARN - poly(a)-specific ribonuclease, AAMP - ang…
GO:0044464	cell part	2.15e-05	0.00144	1.05	4383	4043	487	473	[ARAP1 - arfgap with rhogap domain, ankyrin repeat and ph domain 1, VEZT - vezatin, adherens junctions transmembrane protein, EXOSC10 - exosome component 10, AGAP3 - arfgap with gtpase domain, ankyrin repeat and ph domain 3, SYMPK - symplekin, TADA1 - transcriptional adaptor 1, AAMP - angio-associated, migratory cell protein, NCOA5 - nuclear receptor coactivator 5, STARD3 - star-related lipid tra…
GO:0009890	negative regulation of biosynthetic process	1.4e-05	0.00162	1.71	4383	431	440	74	[VPRBP - vpr (hiv-1) binding protein, EHMT1 - euchromatic histone-lysine n-methyltransferase 1, NSD1 - nuclear receptor binding set domain protein 1, STRN3 - striatin, calmodulin binding protein 3, ZEB1 - zinc finger e-box binding homeobox 1, TNRC6A - trinucleotide repeat containing 6a, FBXW7 - f-box and wd repeat domain containing 7, e3 ubiquitin protein ligase, INPP5K - inositol polyphosphate-5…
GO:0008152	metabolic process	1.38e-05	0.00163	1.15	4383	2651	602	418	[ELL - elongation factor rna polymerase ii, EXOSC10 - exosome component 10, SYMPK - symplekin, TADA1 - transcriptional adaptor 1, NCOA5 - nuclear receptor coactivator 5, STARD3 - star-related lipid transfer (start) domain containing 3, AARS - alanyl-trna synthetase, CD2AP - cd2-associated protein, GDI1 - gdp dissociation inhibitor 1, NCOR2 - nuclear receptor corepressor 2, COX15 - cytochrome c ox…
GO:0071840	cellular component organization or biogenesis	1.4e-05	0.00164	1.22	4383	1446	807	326	[SMARCAD1 - swi/snf-related, matrix-associated actin-dependent regulator of chromatin, subfamily a, containing dead/h box 1, ARAP1 - arfgap with rhogap domain, ankyrin repeat and ph domain 1, MAPRE1 - microtubule-associated protein, rp/eb family, member 1, BNIP3 - bcl2/adenovirus e1b 19kda interacting protein 3, TADA1 - transcriptional adaptor 1, AAMP - angio-associated, migratory cell protein, S…
GO:0031327	negative regulation of cellular biosynthetic process	1.46e-05	0.00167	1.76	4383	424	399	68	[VPRBP - vpr (hiv-1) binding protein, EHMT1 - euchromatic histone-lysine n-methyltransferase 1, NSD1 - nuclear receptor binding set domain protein 1, STRN3 - striatin, calmodulin binding protein 3, ZEB1 - zinc finger e-box binding homeobox 1, TNRC6A - trinucleotide repeat containing 6a, FBXW7 - f-box and wd repeat domain containing 7, e3 ubiquitin protein ligase, INPP5K - inositol polyphosphate-5…
GO:0000785	chromatin	2.73e-05	0.00175	2.33	4383	122	508	33	[SMARCAD1 - swi/snf-related, matrix-associated actin-dependent regulator of chromatin, subfamily a, containing dead/h box 1, EXOSC10 - exosome component 10, NIPBL - nipped-b homolog (drosophila), POLR3D - polymerase (rna) iii (dna directed) polypeptide d, 44kda, TCF12 - transcription factor 12, UBA1 - ubiquitin-like modifier activating enzyme 1, XRCC1 - x-ray repair complementing defective repair…
GO:0016073	snRNA metabolic process	1.63e-05	0.00185	3.11	4383	33	768	18	[CCNK - cyclin k, ELL - elongation factor rna polymerase ii, RPRD1B - regulation of nuclear pre-mrna domain containing 1b, INTS9 - integrator complex subunit 9, CCNT2 - cyclin t2, CDK9 - cyclin-dependent kinase 9, VWA9 - von willebrand factor a domain containing 9, SRRT - serrate rna effector molecule homolog (arabidopsis), CDK7 - cyclin-dependent kinase 7, RPRD2 - regulation of nuclear pre-mrna …
GO:0009057	macromolecule catabolic process	1.72e-05	0.00193	1.64	4383	297	721	80	[AP2A1 - adaptor-related protein complex 2, alpha 1 subunit, BNIP3 - bcl2/adenovirus e1b 19kda interacting protein 3, EXOSC10 - exosome component 10, PGM1 - phosphoglucomutase 1, CAPN1 - calpain 1, (mu/i) large subunit, PARN - poly(a)-specific ribonuclease, SLC9A1 - solute carrier family 9, subfamily a (nhe1, cation proton antiporter 1), member 1, FBXW7 - f-box and wd repeat domain containing 7, …
GO:0016043	cellular component organization	1.85e-05	0.00206	1.22	4383	1434	807	323	[SMARCAD1 - swi/snf-related, matrix-associated actin-dependent regulator of chromatin, subfamily a, containing dead/h box 1, ARAP1 - arfgap with rhogap domain, ankyrin repeat and ph domain 1, MAPRE1 - microtubule-associated protein, rp/eb family, member 1, BNIP3 - bcl2/adenovirus e1b 19kda interacting protein 3, TADA1 - transcriptional adaptor 1, SPIRE1 - spire actin nucleation factor 1, STARD3 -…
GO:0005737	cytoplasm	3.59e-05	0.0022	1.34	4383	1186	483	175	[DHX36 - deah (asp-glu-ala-his) box polypeptide 36, DHX8 - deah (asp-glu-ala-his) box polypeptide 8, EXOSC10 - exosome component 10, AGAP3 - arfgap with gtpase domain, ankyrin repeat and ph domain 3, DTX3L - deltex 3-like (drosophila), SYMPK - symplekin, PARN - poly(a)-specific ribonuclease, SPIRE1 - spire actin nucleation factor 1, STARD3 - star-related lipid transfer (start) domain containing 3…
GO:0030529	intracellular ribonucleoprotein complex	3.94e-05	0.00222	1.64	4383	243	791	72	[HNRNPUL1 - heterogeneous nuclear ribonucleoprotein u-like 1, DHX9 - deah (asp-glu-ala-his) box helicase 9, DHX8 - deah (asp-glu-ala-his) box polypeptide 8, DHX32 - deah (asp-glu-ala-his) box polypeptide 32, SYMPK - symplekin, PRPF3 - pre-mrna processing factor 3, MCRS1 - microspherule protein 1, AAMP - angio-associated, migratory cell protein, NRDE2 - nrde-2, necessary for rna interference, doma…
GO:1903507	negative regulation of nucleic acid-templated transcription	2.07e-05	0.00225	1.86	4383	330	399	56	[VPRBP - vpr (hiv-1) binding protein, EHMT1 - euchromatic histone-lysine n-methyltransferase 1, NSD1 - nuclear receptor binding set domain protein 1, ZEB1 - zinc finger e-box binding homeobox 1, STRN3 - striatin, calmodulin binding protein 3, INPP5K - inositol polyphosphate-5-phosphatase k, XPO1 - exportin 1 (crm1 homolog, yeast), TSC22D4 - tsc22 domain family, member 4, BAHD1 - bromo adjacent ho…
GO:0034660	ncRNA metabolic process	2.06e-05	0.00226	1.83	4383	165	811	56	[CCNK - cyclin k, ELL - elongation factor rna polymerase ii, INTS9 - integrator complex subunit 9, EXOSC10 - exosome component 10, NOP2 - nop2 nucleolar protein, PARN - poly(a)-specific ribonuclease, AARS - alanyl-trna synthetase, LARS - leucyl-trna synthetase, RPRD2 - regulation of nuclear pre-mrna domain containing 2, INTS10 - integrator complex subunit 10, ZNF143 - zinc finger protein 143, SIR…
GO:1990904	ribonucleoprotein complex	3.94e-05	0.00231	1.64	4383	243	791	72	[HNRNPUL1 - heterogeneous nuclear ribonucleoprotein u-like 1, DHX9 - deah (asp-glu-ala-his) box helicase 9, DHX8 - deah (asp-glu-ala-his) box polypeptide 8, DHX32 - deah (asp-glu-ala-his) box polypeptide 32, SYMPK - symplekin, PRPF3 - pre-mrna processing factor 3, MCRS1 - microspherule protein 1, AAMP - angio-associated, migratory cell protein, NRDE2 - nrde-2, necessary for rna interference, doma…
GO:1902679	negative regulation of RNA biosynthetic process	2.2e-05	0.00236	1.86	4383	331	399	56	[VPRBP - vpr (hiv-1) binding protein, EHMT1 - euchromatic histone-lysine n-methyltransferase 1, NSD1 - nuclear receptor binding set domain protein 1, ZEB1 - zinc finger e-box binding homeobox 1, STRN3 - striatin, calmodulin binding protein 3, INPP5K - inositol polyphosphate-5-phosphatase k, XPO1 - exportin 1 (crm1 homolog, yeast), TSC22D4 - tsc22 domain family, member 4, BAHD1 - bromo adjacent ho…
GO:0022402	cell cycle process	2.42e-05	0.00257	1.91	4383	315	379	52	[SMARCAD1 - swi/snf-related, matrix-associated actin-dependent regulator of chromatin, subfamily a, containing dead/h box 1, MAPRE1 - microtubule-associated protein, rp/eb family, member 1, SPIRE1 - spire actin nucleation factor 1, FBXW7 - f-box and wd repeat domain containing 7, e3 ubiquitin protein ligase, CAMK2G - calcium/calmodulin-dependent protein kinase ii gamma, XPO1 - exportin 1 (crm1 ho…
GO:0033044	regulation of chromosome organization	2.91e-05	0.00307	2.54	4383	102	473	28	[DHX36 - deah (asp-glu-ala-his) box polypeptide 36, EXOSC10 - exosome component 10, MTF2 - metal response element binding transcription factor 2, NIPBL - nipped-b homolog (drosophila), PARN - poly(a)-specific ribonuclease, NSD1 - nuclear receptor binding set domain protein 1, ZNF451 - zinc finger protein 451, SETDB1 - set domain, bifurcated 1, NAT10 - n-acetyltransferase 10 (gcn5-related), XRCC1 …
GO:0044212	transcription regulatory region DNA binding	1.83e-05	0.00325	2.08	4383	257	352	43	[DHX36 - deah (asp-glu-ala-his) box polypeptide 36, MTF2 - metal response element binding transcription factor 2, NSD1 - nuclear receptor binding set domain protein 1, ZEB1 - zinc finger e-box binding homeobox 1, TCF12 - transcription factor 12, CC2D1B - coiled-coil and c2 domain containing 1b, TCF20 - transcription factor 20 (ar1), HNRNPU - heterogeneous nuclear ribonucleoprotein u (scaffold att…
GO:1901576	organic substance biosynthetic process	3.28e-05	0.00339	1.37	4383	1148	428	154	[CCNK - cyclin k, DHX36 - deah (asp-glu-ala-his) box polypeptide 36, SYMPK - symplekin, POLR3D - polymerase (rna) iii (dna directed) polypeptide d, 44kda, TADA1 - transcriptional adaptor 1, SETDB1 - set domain, bifurcated 1, ZEB1 - zinc finger e-box binding homeobox 1, TCF12 - transcription factor 12, INPP5K - inositol polyphosphate-5-phosphatase k, TSC22D4 - tsc22 domain family, member 4, STARD7…
GO:1903320	regulation of protein modification by small protein conjugation or removal	3.27e-05	0.00341	2.58	4383	98	468	27	[PSMD11 - proteasome (prosome, macropain) 26s subunit, non-atpase, 11, PSMD13 - proteasome (prosome, macropain) 26s subunit, non-atpase, 13, AXIN1 - axin 1, ZER1 - zyg-11 related, cell cycle regulator, FBXW7 - f-box and wd repeat domain containing 7, e3 ubiquitin protein ligase, HMG20A - high mobility group 20a, RELA - v-rel avian reticuloendotheliosis viral oncogene homolog a, PDCD6 - programmed…
GO:1903047	mitotic cell cycle process	3.33e-05	0.00341	1.61	4383	202	999	74	[MAPRE1 - microtubule-associated protein, rp/eb family, member 1, CDK5RAP2 - cdk5 regulatory subunit associated protein 2, NUP133 - nucleoporin 133kda, CAMK2G - calcium/calmodulin-dependent protein kinase ii gamma, SMC3 - structural maintenance of chromosomes 3, CDC27 - cell division cycle 27, PDS5A - pds5, regulator of cohesion maintenance, homolog a (s. cerevisiae), CTDNEP1 - ctd nuclear envelo…
GO:0044265	cellular macromolecule catabolic process	3.65e-05	0.0037	1.58	4383	254	883	81	[AP2A1 - adaptor-related protein complex 2, alpha 1 subunit, BNIP3 - bcl2/adenovirus e1b 19kda interacting protein 3, KLHL42 - kelch-like family member 42, EXOSC10 - exosome component 10, PARN - poly(a)-specific ribonuclease, FBXW7 - f-box and wd repeat domain containing 7, e3 ubiquitin protein ligase, CD2AP - cd2-associated protein, RBCK1 - ranbp-type and c3hc4-type zinc finger containing 1, RNF…
GO:0000975	regulatory region DNA binding	2.22e-05	0.00371	2.07	4383	259	352	43	[DHX36 - deah (asp-glu-ala-his) box polypeptide 36, MTF2 - metal response element binding transcription factor 2, NSD1 - nuclear receptor binding set domain protein 1, ZEB1 - zinc finger e-box binding homeobox 1, TCF12 - transcription factor 12, CC2D1B - coiled-coil and c2 domain containing 1b, TCF20 - transcription factor 20 (ar1), HNRNPU - heterogeneous nuclear ribonucleoprotein u (scaffold att…
GO:0001067	regulatory region nucleic acid binding	2.49e-05	0.00394	2.06	4383	260	352	43	[DHX36 - deah (asp-glu-ala-his) box polypeptide 36, MTF2 - metal response element binding transcription factor 2, NSD1 - nuclear receptor binding set domain protein 1, ZEB1 - zinc finger e-box binding homeobox 1, TCF12 - transcription factor 12, CC2D1B - coiled-coil and c2 domain containing 1b, TCF20 - transcription factor 20 (ar1), HNRNPU - heterogeneous nuclear ribonucleoprotein u (scaffold att…
GO:0035601	protein deacylation	4.19e-05	0.00417	4.99	4383	29	333	11	[SALL1 - sal-like 1 (drosophila), SMARCAD1 - swi/snf-related, matrix-associated actin-dependent regulator of chromatin, subfamily a, containing dead/h box 1, CHD4 - chromodomain helicase dna binding protein 4, MTA2 - metastasis associated 1 family, member 2, HDAC3 - histone deacetylase 3, MTA1 - metastasis associated 1, LYPLA2 - lysophospholipase ii, KDM1A - lysine (k)-specific demethylase 1a, SI…
GO:0006368	transcription elongation from RNA polymerase II promoter	4.16e-05	0.00418	2.74	4383	32	950	19	[CCNK - cyclin k, ELL - elongation factor rna polymerase ii, CCNT2 - cyclin t2, CDK9 - cyclin-dependent kinase 9, ERCC3 - excision repair cross-complementing rodent repair deficiency, complementation group 3, CDK7 - cyclin-dependent kinase 7, CDK13 - cyclin-dependent kinase 13, NELFA - negative elongation factor complex member a, TAF2 - taf2 rna polymerase ii, tata box binding protein (tbp)-assoc…
GO:0048523	negative regulation of cellular process	4.36e-05	0.00431	1.33	4383	1261	469	179	[CCNK - cyclin k, ARAP1 - arfgap with rhogap domain, ankyrin repeat and ph domain 1, VPS72 - vacuolar protein sorting 72 homolog (s. cerevisiae), MAPRE1 - microtubule-associated protein, rp/eb family, member 1, DHX36 - deah (asp-glu-ala-his) box polypeptide 36, PARN - poly(a)-specific ribonuclease, NCOA5 - nuclear receptor coactivator 5, ZEB1 - zinc finger e-box binding homeobox 1, AARS - alanyl-…
GO:0009987	cellular process	4.44e-05	0.00434	1.09	4383	3601	475	425	[ARAP1 - arfgap with rhogap domain, ankyrin repeat and ph domain 1, EXOSC10 - exosome component 10, AGAP3 - arfgap with gtpase domain, ankyrin repeat and ph domain 3, SYMPK - symplekin, TADA1 - transcriptional adaptor 1, AAMP - angio-associated, migratory cell protein, NCOA5 - nuclear receptor coactivator 5, STARD3 - star-related lipid transfer (start) domain containing 3, AARS - alanyl-trna synt…
GO:0000122	negative regulation of transcription from RNA polymerase II promoter	5.05e-05	0.00485	2.02	4383	243	375	42	[AXIN1 - axin 1, MTF2 - metal response element binding transcription factor 2, VPRBP - vpr (hiv-1) binding protein, NIPBL - nipped-b homolog (drosophila), EHMT1 - euchromatic histone-lysine n-methyltransferase 1, NSD1 - nuclear receptor binding set domain protein 1, ZEB1 - zinc finger e-box binding homeobox 1, XPO1 - exportin 1 (crm1 homolog, yeast), HMG20A - high mobility group 20a, CC2D1B - coi…
GO:0045892	negative regulation of transcription, DNA-templated	5.02e-05	0.00486	1.82	4383	323	409	55	[VPRBP - vpr (hiv-1) binding protein, EHMT1 - euchromatic histone-lysine n-methyltransferase 1, NSD1 - nuclear receptor binding set domain protein 1, ZEB1 - zinc finger e-box binding homeobox 1, STRN3 - striatin, calmodulin binding protein 3, INPP5K - inositol polyphosphate-5-phosphatase k, XPO1 - exportin 1 (crm1 homolog, yeast), TSC22D4 - tsc22 domain family, member 4, BAHD1 - bromo adjacent ho…
GO:0051028	mRNA transport	5.29e-05	0.00503	2.96	4383	45	626	19	[NUP205 - nucleoporin 205kda, SYMPK - symplekin, NUP133 - nucleoporin 133kda, BICD2 - bicaudal d homolog 2 (drosophila), XPO1 - exportin 1 (crm1 homolog, yeast), WDR33 - wd repeat domain 33, SUPT6H - suppressor of ty 6 homolog (s. cerevisiae), ZC3H3 - zinc finger ccch-type containing 3, SMG6 - smg6 nonsense mediated mrna decay factor, NUP153 - nucleoporin 153kda, MYO1C - myosin ic, SMG7 - smg7 no…
GO:0044454	nuclear chromosome part	0.00011	0.00575	2.32	4383	129	440	30	[SMARCAD1 - swi/snf-related, matrix-associated actin-dependent regulator of chromatin, subfamily a, containing dead/h box 1, POLR3D - polymerase (rna) iii (dna directed) polypeptide d, 44kda, MCRS1 - microspherule protein 1, NAT10 - n-acetyltransferase 10 (gcn5-related), TCF12 - transcription factor 12, XRCC1 - x-ray repair complementing defective repair in chinese hamster cells 1, RELA - v-rel a…
GO:0098732	macromolecule deacylation	6.26e-05	0.0059	4.83	4383	30	333	11	[SALL1 - sal-like 1 (drosophila), SMARCAD1 - swi/snf-related, matrix-associated actin-dependent regulator of chromatin, subfamily a, containing dead/h box 1, CHD4 - chromodomain helicase dna binding protein 4, MTA2 - metastasis associated 1 family, member 2, HDAC3 - histone deacetylase 3, MTA1 - metastasis associated 1, LYPLA2 - lysophospholipase ii, SIRT7 - sirtuin 7, KDM1A - lysine (k)-specific…
GO:0006996	organelle organization	6.6e-05	0.00612	1.31	4383	632	999	189	[DHX9 - deah (asp-glu-ala-his) box helicase 9, MAPRE1 - microtubule-associated protein, rp/eb family, member 1, BNIP3 - bcl2/adenovirus e1b 19kda interacting protein 3, MARK2 - map/microtubule affinity-regulating kinase 2, SPTAN1 - spectrin, alpha, non-erythrocytic 1, SPIRE1 - spire actin nucleation factor 1, SCFD1 - sec1 family domain containing 1, CD2AP - cd2-associated protein, INPP5K - inosit…
GO:0051172	negative regulation of nitrogen compound metabolic process	6.56e-05	0.00614	1.58	4383	660	353	84	[DHX36 - deah (asp-glu-ala-his) box polypeptide 36, VPRBP - vpr (hiv-1) binding protein, EHMT1 - euchromatic histone-lysine n-methyltransferase 1, PARN - poly(a)-specific ribonuclease, NSD1 - nuclear receptor binding set domain protein 1, STRN3 - striatin, calmodulin binding protein 3, ZEB1 - zinc finger e-box binding homeobox 1, TNRC6A - trinucleotide repeat containing 6a, FBXW7 - f-box and wd r…
GO:0006259	DNA metabolic process	6.71e-05	0.00617	1.68	4383	209	786	63	[SMARCAD1 - swi/snf-related, matrix-associated actin-dependent regulator of chromatin, subfamily a, containing dead/h box 1, VPRBP - vpr (hiv-1) binding protein, DTX3L - deltex 3-like (drosophila), EPC2 - enhancer of polycomb homolog 2 (drosophila), EHMT1 - euchromatic histone-lysine n-methyltransferase 1, MCRS1 - microspherule protein 1, SMC3 - structural maintenance of chromosomes 3, XRCC1 - x-…
GO:0016925	protein sumoylation	6.8e-05	0.0062	4	4383	23	572	12	[SAE1 - sumo1 activating enzyme subunit 1, PIAS1 - protein inhibitor of activated stat, 1, NUP205 - nucleoporin 205kda, PIAS4 - protein inhibitor of activated stat, 4, TOP1 - topoisomerase (dna) i, MTA1 - metastasis associated 1, NUP133 - nucleoporin 133kda, NUP153 - nucleoporin 153kda, ZNF451 - zinc finger protein 451, PIAS3 - protein inhibitor of activated stat, 3, NUP85 - nucleoporin 85kda, NU…
GO:0044403	symbiosis, encompassing mutualism through parasitism	7.23e-05	0.00648	1.8	4383	179	695	51	[DHX9 - deah (asp-glu-ala-his) box helicase 9, CCNK - cyclin k, AP2A1 - adaptor-related protein complex 2, alpha 1 subunit, BNIP3 - bcl2/adenovirus e1b 19kda interacting protein 3, VPRBP - vpr (hiv-1) binding protein, NUP133 - nucleoporin 133kda, USF2 - upstream transcription factor 2, c-fos interacting, FBXW7 - f-box and wd repeat domain containing 7, e3 ubiquitin protein ligase, ZMYND11 - zinc …
GO:0031398	positive regulation of protein ubiquitination	7.34e-05	0.00652	2.43	4383	59	764	25	[PSMD11 - proteasome (prosome, macropain) 26s subunit, non-atpase, 11, PSMD13 - proteasome (prosome, macropain) 26s subunit, non-atpase, 13, AXIN1 - axin 1, FBXW7 - f-box and wd repeat domain containing 7, e3 ubiquitin protein ligase, CTR9 - ctr9, paf1/rna polymerase ii complex component, PDCD6 - programmed cell death 6, CHFR - checkpoint with forkhead and ring finger domains, e3 ubiquitin protei…
GO:0016032	viral process	7.23e-05	0.00653	1.8	4383	179	695	51	[CCNK - cyclin k, DHX9 - deah (asp-glu-ala-his) box helicase 9, AP2A1 - adaptor-related protein complex 2, alpha 1 subunit, BNIP3 - bcl2/adenovirus e1b 19kda interacting protein 3, VPRBP - vpr (hiv-1) binding protein, NUP133 - nucleoporin 133kda, USF2 - upstream transcription factor 2, c-fos interacting, FBXW7 - f-box and wd repeat domain containing 7, e3 ubiquitin protein ligase, ZMYND11 - zinc …
GO:0098781	ncRNA transcription	8.03e-05	0.00702	2.78	4383	39	768	19	[CCNK - cyclin k, ELL - elongation factor rna polymerase ii, RPRD1B - regulation of nuclear pre-mrna domain containing 1b, INTS9 - integrator complex subunit 9, CCNT2 - cyclin t2, CDK9 - cyclin-dependent kinase 9, VWA9 - von willebrand factor a domain containing 9, SRRT - serrate rna effector molecule homolog (arabidopsis), CDK7 - cyclin-dependent kinase 7, RPRD2 - regulation of nuclear pre-mrna …
GO:0006974	cellular response to DNA damage stimulus	7.98e-05	0.00703	2	4383	220	409	41	[CCNK - cyclin k, EPC2 - enhancer of polycomb homolog 2 (drosophila), NIPBL - nipped-b homolog (drosophila), DTX3L - deltex 3-like (drosophila), MCRS1 - microspherule protein 1, UBA1 - ubiquitin-like modifier activating enzyme 1, PIK3R1 - phosphoinositide-3-kinase, regulatory subunit 1 (alpha), SSRP1 - structure specific recognition protein 1, AQR - aquarius homolog (mouse), ACTR5 - arp5 actin-re…
GO:0031324	negative regulation of cellular metabolic process	9.38e-05	0.00814	1.5	4383	707	409	99	[DHX36 - deah (asp-glu-ala-his) box polypeptide 36, PARN - poly(a)-specific ribonuclease, ZEB1 - zinc finger e-box binding homeobox 1, TNRC6A - trinucleotide repeat containing 6a, INPP5K - inositol polyphosphate-5-phosphatase k, TSC22D4 - tsc22 domain family, member 4, RELA - v-rel avian reticuloendotheliosis viral oncogene homolog a, IQGAP1 - iq motif containing gtpase activating protein 1, BCOR…
GO:0009058	biosynthetic process	9.77e-05	0.00834	1.35	4383	1169	428	154	[CCNK - cyclin k, DHX36 - deah (asp-glu-ala-his) box polypeptide 36, SYMPK - symplekin, POLR3D - polymerase (rna) iii (dna directed) polypeptide d, 44kda, TADA1 - transcriptional adaptor 1, SETDB1 - set domain, bifurcated 1, ZEB1 - zinc finger e-box binding homeobox 1, TCF12 - transcription factor 12, INPP5K - inositol polyphosphate-5-phosphatase k, TSC22D4 - tsc22 domain family, member 4, STARD7…
GO:0009894	regulation of catabolic process	9.71e-05	0.00836	1.67	4383	310	559	66	[DHX36 - deah (asp-glu-ala-his) box polypeptide 36, BNIP3 - bcl2/adenovirus e1b 19kda interacting protein 3, PARN - poly(a)-specific ribonuclease, FYCO1 - fyve and coiled-coil domain containing 1, NUP133 - nucleoporin 133kda, LARS - leucyl-trna synthetase, FBXW7 - f-box and wd repeat domain containing 7, e3 ubiquitin protein ligase, XPO1 - exportin 1 (crm1 homolog, yeast), VPS35 - vacuolar protei…
GO:0051641	cellular localization	0.000103	0.00874	1.31	4383	628	999	187	[TOB1 - transducer of erbb2, 1, DHX9 - deah (asp-glu-ala-his) box helicase 9, MAPRE1 - microtubule-associated protein, rp/eb family, member 1, MARK2 - map/microtubule affinity-regulating kinase 2, SPTAN1 - spectrin, alpha, non-erythrocytic 1, EXOSC10 - exosome component 10, KDELR1 - kdel (lys-asp-glu-leu) endoplasmic reticulum protein retention receptor 1, SYMPK - symplekin, SPIRE1 - spire actin …
GO:0019538	protein metabolic process	0.000107	0.00898	1.32	4383	1209	472	172	[SMARCAD1 - swi/snf-related, matrix-associated actin-dependent regulator of chromatin, subfamily a, containing dead/h box 1, CCNK - cyclin k, TMEM165 - transmembrane protein 165, DTX3L - deltex 3-like (drosophila), TADA1 - transcriptional adaptor 1, KBTBD2 - kelch repeat and btb (poz) domain containing 2, FLT1 - fms-related tyrosine kinase 1, SETDB1 - set domain, bifurcated 1, TRAK1 - trafficking…
GO:0008013	beta-catenin binding	6.3e-05	0.00943	4.3	4383	29	422	12	[SALL1 - sal-like 1 (drosophila), KANK1 - kn motif and ankyrin repeat domains 1, CDH5 - cadherin 5, type 2 (vascular endothelium), AXIN1 - axin 1, CARM1 - coactivator-associated arginine methyltransferase 1, ASH2L - ash2 (absent, small, or homeotic)-like (drosophila), SMAD3 - smad family member 3, CD2AP - cd2-associated protein, SMAD7 - smad family member 7, DVL3 - dishevelled segment polarity pr…
GO:0006405	RNA export from nucleus	0.000114	0.00946	3.21	4383	41	533	16	[NMD3 - nmd3 ribosome export adaptor, NUP205 - nucleoporin 205kda, SYMPK - symplekin, NUP133 - nucleoporin 133kda, XPO1 - exportin 1 (crm1 homolog, yeast), WDR33 - wd repeat domain 33, ZC3H3 - zinc finger ccch-type containing 3, SMG6 - smg6 nonsense mediated mrna decay factor, NUP153 - nucleoporin 153kda, SMG7 - smg7 nonsense mediated mrna decay factor, DHX38 - deah (asp-glu-ala-his) box polypept…
GO:0016575	histone deacetylation	0.000134	0.0109	4.87	4383	27	333	10	[SALL1 - sal-like 1 (drosophila), SMARCAD1 - swi/snf-related, matrix-associated actin-dependent regulator of chromatin, subfamily a, containing dead/h box 1, CHD4 - chromodomain helicase dna binding protein 4, MTA2 - metastasis associated 1 family, member 2, HDAC3 - histone deacetylase 3, MTA1 - metastasis associated 1, KDM1A - lysine (k)-specific demethylase 1a, SIRT7 - sirtuin 7, HDAC5 - histon…
GO:0006476	protein deacetylation	0.000134	0.011	4.87	4383	27	333	10	[SALL1 - sal-like 1 (drosophila), SMARCAD1 - swi/snf-related, matrix-associated actin-dependent regulator of chromatin, subfamily a, containing dead/h box 1, CHD4 - chromodomain helicase dna binding protein 4, MTA2 - metastasis associated 1 family, member 2, HDAC3 - histone deacetylase 3, MTA1 - metastasis associated 1, SIRT7 - sirtuin 7, KDM1A - lysine (k)-specific demethylase 1a, SIRT2 - sirtui…
GO:0031123	RNA 3'-end processing	0.000143	0.0116	2.65	4383	32	930	18	[CPSF3 - cleavage and polyadenylation specific factor 3, 73kda, CSTF1 - cleavage stimulation factor, 3' pre-rna, subunit 1, 50kda, PCF11 - pcf11 cleavage and polyadenylation factor subunit, SYMPK - symplekin, CPSF6 - cleavage and polyadenylation specific factor 6, 68kda, WDR33 - wd repeat domain 33, SUPV3L1 - suppressor of var1, 3-like 1 (s. cerevisiae), ZC3H3 - zinc finger ccch-type containing 3…
GO:0051276	chromosome organization	0.000162	0.013	1.9	4383	104	885	40	[DHX9 - deah (asp-glu-ala-his) box helicase 9, MAPRE1 - microtubule-associated protein, rp/eb family, member 1, TEP1 - telomerase-associated protein 1, NIPBL - nipped-b homolog (drosophila), NUP133 - nucleoporin 133kda, NCAPD2 - non-smc condensin i complex, subunit d2, FBXW7 - f-box and wd repeat domain containing 7, e3 ubiquitin protein ligase, GPS1 - g protein pathway suppressor 1, XPO1 - expor…
GO:0040029	regulation of gene expression, epigenetic	0.000195	0.0154	2.9	4383	54	504	18	[CNOT1 - ccr4-not transcription complex, subunit 1, MTF2 - metal response element binding transcription factor 2, EXOSC10 - exosome component 10, TNRC6A - trinucleotide repeat containing 6a, BAHD1 - bromo adjacent homology domain containing 1, SUPT6H - suppressor of ty 6 homolog (s. cerevisiae), ARID1B - at rich interactive domain 1b (swi1-like), EPC1 - enhancer of polycomb homolog 1 (drosophila)…
GO:0051438	regulation of ubiquitin-protein transferase activity	0.000194	0.0155	3.32	4383	32	578	14	[PSMD11 - proteasome (prosome, macropain) 26s subunit, non-atpase, 11, PSMD13 - proteasome (prosome, macropain) 26s subunit, non-atpase, 13, AXIN1 - axin 1, ZER1 - zyg-11 related, cell cycle regulator, FBXW7 - f-box and wd repeat domain containing 7, e3 ubiquitin protein ligase, PSMB4 - proteasome (prosome, macropain) subunit, beta type, 4, PSMD1 - proteasome (prosome, macropain) 26s subunit, non…
GO:0016607	nuclear speck	0.000319	0.016	1.81	4383	132	805	44	[GRK5 - g protein-coupled receptor kinase 5, HBP1 - hmg-box transcription factor 1, VPS72 - vacuolar protein sorting 72 homolog (s. cerevisiae), ELL - elongation factor rna polymerase ii, TAB1 - tgf-beta activated kinase 1/map3k7 binding protein 1, PNISR - pnn-interacting serine/arginine-rich protein, POLR3D - polymerase (rna) iii (dna directed) polypeptide d, 44kda, PRPF3 - pre-mrna processing f…
GO:0006406	mRNA export from nucleus	0.000263	0.0204	3.29	4383	35	533	14	[NUP205 - nucleoporin 205kda, SYMPK - symplekin, NUP133 - nucleoporin 133kda, WDR33 - wd repeat domain 33, ZC3H3 - zinc finger ccch-type containing 3, SMG6 - smg6 nonsense mediated mrna decay factor, NUP153 - nucleoporin 153kda, SMG7 - smg7 nonsense mediated mrna decay factor, DHX38 - deah (asp-glu-ala-his) box polypeptide 38, UPF1 - upf1 regulator of nonsense transcripts homolog (yeast), CASC3 -…
GO:0000976	transcription regulatory region sequence-specific DNA binding	0.000163	0.022	2.16	4383	203	320	32	[MTF2 - metal response element binding transcription factor 2, NSD1 - nuclear receptor binding set domain protein 1, TCF12 - transcription factor 12, CC2D1B - coiled-coil and c2 domain containing 1b, TCF20 - transcription factor 20 (ar1), FLI1 - fli-1 proto-oncogene, ets transcription factor, BCOR - bcl6 corepressor, XRN2 - 5'-3' exoribonuclease 2, NFATC3 - nuclear factor of activated t-cells, cy…
GO:1900182	positive regulation of protein localization to nucleus	0.000292	0.0223	4.25	4383	39	291	11	[PARP1 - poly (adp-ribose) polymerase 1, KANK1 - kn motif and ankyrin repeat domains 1, RBPMS - rna binding protein with multiple splicing, NMD3 - nmd3 ribosome export adaptor, AKT1 - v-akt murine thymoma viral oncogene homolog 1, HDAC3 - histone deacetylase 3, MCRS1 - microspherule protein 1, CHERP - calcium homeostasis endoplasmic reticulum protein, CCT4 - chaperonin containing tcp1, subunit 4 …
GO:0043565	sequence-specific DNA binding	0.000207	0.0246	1.98	4383	270	320	39	[MTF2 - metal response element binding transcription factor 2, NSD1 - nuclear receptor binding set domain protein 1, TCF12 - transcription factor 12, GOLGB1 - golgin b1, CC2D1B - coiled-coil and c2 domain containing 1b, TCF20 - transcription factor 20 (ar1), FLI1 - fli-1 proto-oncogene, ets transcription factor, PPARGC1A - peroxisome proliferator-activated receptor gamma, coactivator 1 alpha, BCO…
GO:0042623	ATPase activity, coupled	0.000231	0.0253	1.84	4383	99	985	41	[DHX9 - deah (asp-glu-ala-his) box helicase 9, LONP1 - lon peptidase 1, mitochondrial, DHX36 - deah (asp-glu-ala-his) box polypeptide 36, DHX8 - deah (asp-glu-ala-his) box polypeptide 8, DDX41 - dead (asp-glu-ala-asp) box polypeptide 41, CHD6 - chromodomain helicase dna binding protein 6, ERCC3 - excision repair cross-complementing rodent repair deficiency, complementation group 3, NSF - n-ethylm…
GO:0003712	transcription cofactor activity	0.00023	0.0261	1.59	4383	180	963	63	[TOB1 - transducer of erbb2, 1, ZMYND8 - zinc finger, mynd-type containing 8, PPRC1 - peroxisome proliferator-activated receptor gamma, coactivator-related 1, MED7 - mediator complex subunit 7, TADA1 - transcriptional adaptor 1, MED23 - mediator complex subunit 23, NSD1 - nuclear receptor binding set domain protein 1, ZEB1 - zinc finger e-box binding homeobox 1, N4BP2L2 - nedd4 binding protein 2-…
GO:0042176	regulation of protein catabolic process	0.000349	0.0264	2.18	4383	129	468	30	[PSMD11 - proteasome (prosome, macropain) 26s subunit, non-atpase, 11, AXIN1 - axin 1, PSMD13 - proteasome (prosome, macropain) 26s subunit, non-atpase, 13, GGA3 - golgi-associated, gamma adaptin ear containing, arf binding protein 3, FBXW7 - f-box and wd repeat domain containing 7, e3 ubiquitin protein ligase, USP5 - ubiquitin specific peptidase 5 (isopeptidase t), XPO1 - exportin 1 (crm1 homolo…
GO:0006281	DNA repair	0.000383	0.0288	2.07	4383	137	510	33	[DTX3L - deltex 3-like (drosophila), EPC2 - enhancer of polycomb homolog 2 (drosophila), MCRS1 - microspherule protein 1, GPS1 - g protein pathway suppressor 1, SMC3 - structural maintenance of chromosomes 3, XRCC1 - x-ray repair complementing defective repair in chinese hamster cells 1, SSRP1 - structure specific recognition protein 1, AQR - aquarius homolog (mouse), ACTR5 - arp5 actin-related p…
GO:0006354	DNA-templated transcription, elongation	0.00042	0.0312	2.37	4383	39	950	20	[CCNK - cyclin k, ELL - elongation factor rna polymerase ii, CCNT2 - cyclin t2, CDK9 - cyclin-dependent kinase 9, ERCC3 - excision repair cross-complementing rodent repair deficiency, complementation group 3, CDK7 - cyclin-dependent kinase 7, CDK13 - cyclin-dependent kinase 13, NELFA - negative elongation factor complex member a, TAF2 - taf2 rna polymerase ii, tata box binding protein (tbp)-assoc…
GO:0061695	transferase complex, transferring phosphorus-containing groups	0.00078	0.0314	2.06	4383	68	844	27	[PRKAG2 - protein kinase, amp-activated, gamma 2 non-catalytic subunit, CCNK - cyclin k, RPRD1B - regulation of nuclear pre-mrna domain containing 1b, CCNT2 - cyclin t2, CHD6 - chromodomain helicase dna binding protein 6, POLR3D - polymerase (rna) iii (dna directed) polypeptide d, 44kda, PAPD4 - pap associated domain containing 4, PIK3R1 - phosphoinositide-3-kinase, regulatory subunit 1 (alpha), …
GO:0044419	interspecies interaction between organisms	0.00042	0.0314	1.63	4383	224	695	58	[CCNK - cyclin k, DHX9 - deah (asp-glu-ala-his) box helicase 9, AP2A1 - adaptor-related protein complex 2, alpha 1 subunit, BNIP3 - bcl2/adenovirus e1b 19kda interacting protein 3, VPRBP - vpr (hiv-1) binding protein, NUP133 - nucleoporin 133kda, USF2 - upstream transcription factor 2, c-fos interacting, INPP5K - inositol polyphosphate-5-phosphatase k, FBXW7 - f-box and wd repeat domain containin…
GO:0043226	organelle	0.000761	0.0315	1.13	4383	2988	382	294	[CCNK - cyclin k, MAPRE1 - microtubule-associated protein, rp/eb family, member 1, VEZT - vezatin, adherens junctions transmembrane protein, SYMPK - symplekin, AAMP - angio-associated, migratory cell protein, SPIRE1 - spire actin nucleation factor 1, AARS - alanyl-trna synthetase, DHX30 - deah (asp-glu-ala-his) box helicase 30, TSC22D4 - tsc22 domain family, member 4, MKS1 - meckel syndrome, type…
GO:1990837	sequence-specific double-stranded DNA binding	0.000301	0.0317	2.1	4383	209	320	32	[MTF2 - metal response element binding transcription factor 2, NSD1 - nuclear receptor binding set domain protein 1, TCF12 - transcription factor 12, CC2D1B - coiled-coil and c2 domain containing 1b, TCF20 - transcription factor 20 (ar1), FLI1 - fli-1 proto-oncogene, ets transcription factor, BCOR - bcl6 corepressor, XRN2 - 5'-3' exoribonuclease 2, NFATC3 - nuclear factor of activated t-cells, cy…
GO:0003690	double-stranded DNA binding	0.000345	0.0339	2.03	4383	229	320	34	[MTF2 - metal response element binding transcription factor 2, NSD1 - nuclear receptor binding set domain protein 1, TCF12 - transcription factor 12, CC2D1B - coiled-coil and c2 domain containing 1b, TCF20 - transcription factor 20 (ar1), FLI1 - fli-1 proto-oncogene, ets transcription factor, BCOR - bcl6 corepressor, XRN2 - 5'-3' exoribonuclease 2, NFATC3 - nuclear factor of activated t-cells, cy…
GO:0033554	cellular response to stress	0.000479	0.0339	1.44	4383	527	570	99	[CCNK - cyclin k, BNIP3 - bcl2/adenovirus e1b 19kda interacting protein 3, DTX3L - deltex 3-like (drosophila), RELA - v-rel avian reticuloendotheliosis viral oncogene homolog a, SCAP - srebf chaperone, DCTN1 - dynactin 1, TXNRD2 - thioredoxin reductase 2, PPM1D - protein phosphatase, mg2+/mn2+ dependent, 1d, UPF1 - upf1 regulator of nonsense transcripts homolog (yeast), SIRT2 - sirtuin 2, MSH6 - …
GO:0046907	intracellular transport	0.000496	0.0346	1.33	4383	471	993	142	[TOB1 - transducer of erbb2, 1, SPTAN1 - spectrin, alpha, non-erythrocytic 1, SYMPK - symplekin, KDELR1 - kdel (lys-asp-glu-leu) endoplasmic reticulum protein retention receptor 1, STARD3 - star-related lipid transfer (start) domain containing 3, SPIRE1 - spire actin nucleation factor 1, TBC1D15 - tbc1 domain family, member 15, TRAK1 - trafficking protein, kinesin binding 1, ERGIC1 - endoplasmic …
GO:0043487	regulation of RNA stability	0.000494	0.0347	2.94	4383	51	468	16	[PSMD11 - proteasome (prosome, macropain) 26s subunit, non-atpase, 11, DHX36 - deah (asp-glu-ala-his) box polypeptide 36, PSMD13 - proteasome (prosome, macropain) 26s subunit, non-atpase, 13, AKT1 - v-akt murine thymoma viral oncogene homolog 1, PARN - poly(a)-specific ribonuclease, MAPKAPK2 - mitogen-activated protein kinase-activated protein kinase 2, XPO1 - exportin 1 (crm1 homolog, yeast), PS…
GO:0008023	transcription elongation factor complex	0.000923	0.0361	3.34	4383	16	819	10	[SUPT6H - suppressor of ty 6 homolog (s. cerevisiae), ELL - elongation factor rna polymerase ii, CCNT2 - cyclin t2, CDK9 - cyclin-dependent kinase 9, SUPT5H - suppressor of ty 5 homolog (s. cerevisiae), NELFA - negative elongation factor complex member a, CDK13 - cyclin-dependent kinase 13, MLLT1 - myeloid/lymphoid or mixed-lineage leukemia (trithorax homolog, drosophila); translocated to, 1, CTR…
GO:0051649	establishment of localization in cell	0.000594	0.0399	1.31	4383	501	999	150	[TOB1 - transducer of erbb2, 1, SPTAN1 - spectrin, alpha, non-erythrocytic 1, KDELR1 - kdel (lys-asp-glu-leu) endoplasmic reticulum protein retention receptor 1, SYMPK - symplekin, STARD3 - star-related lipid transfer (start) domain containing 3, SPIRE1 - spire actin nucleation factor 1, TBC1D15 - tbc1 domain family, member 15, TRAK1 - trafficking protein, kinesin binding 1, ERGIC1 - endoplasmic …
GO:0006913	nucleocytoplasmic transport	0.000624	0.0414	1.9	4383	95	850	35	[TOB1 - transducer of erbb2, 1, NUP205 - nucleoporin 205kda, SYMPK - symplekin, NUP133 - nucleoporin 133kda, XPO1 - exportin 1 (crm1 homolog, yeast), SNUPN - snurportin 1, PIK3R1 - phosphoinositide-3-kinase, regulatory subunit 1 (alpha), AHCYL1 - adenosylhomocysteinase-like 1, RERE - arginine-glutamic acid dipeptide (re) repeats, PML - promyelocytic leukemia, UPF1 - upf1 regulator of nonsense tra…
GO:0007062	sister chromatid cohesion	0.000622	0.0415	3.24	4383	33	533	13	[MAPRE1 - microtubule-associated protein, rp/eb family, member 1, CLASP2 - cytoplasmic linker associated protein 2, DYNC1LI2 - dynein, cytoplasmic 1, light intermediate chain 2, NIPBL - nipped-b homolog (drosophila), NUP133 - nucleoporin 133kda, STAG2 - stromal antigen 2, FBXW7 - f-box and wd repeat domain containing 7, e3 ubiquitin protein ligase, XPO1 - exportin 1 (crm1 homolog, yeast), SMC3 - …
GO:0031396	regulation of protein ubiquitination	0.000648	0.0428	2.02	4383	85	764	30	[PSMD11 - proteasome (prosome, macropain) 26s subunit, non-atpase, 11, PSMD13 - proteasome (prosome, macropain) 26s subunit, non-atpase, 13, AXIN1 - axin 1, ZER1 - zyg-11 related, cell cycle regulator, FBXW7 - f-box and wd repeat domain containing 7, e3 ubiquitin protein ligase, CTR9 - ctr9, paf1/rna polymerase ii complex component, PDCD6 - programmed cell death 6, CHFR - checkpoint with forkhead…
GO:0051236	establishment of RNA localization	0.000682	0.0439	2.46	4383	57	626	20	[NMD3 - nmd3 ribosome export adaptor, NUP205 - nucleoporin 205kda, SYMPK - symplekin, NUP133 - nucleoporin 133kda, BICD2 - bicaudal d homolog 2 (drosophila), XPO1 - exportin 1 (crm1 homolog, yeast), WDR33 - wd repeat domain 33, SUPT6H - suppressor of ty 6 homolog (s. cerevisiae), ZC3H3 - zinc finger ccch-type containing 3, SMG6 - smg6 nonsense mediated mrna decay factor, NUP153 - nucleoporin 153k…
GO:0010639	negative regulation of organelle organization	0.000673	0.0441	1.92	4383	108	741	35	[ARAP1 - arfgap with rhogap domain, ankyrin repeat and ph domain 1, MAPRE1 - microtubule-associated protein, rp/eb family, member 1, BNIP3 - bcl2/adenovirus e1b 19kda interacting protein 3, MTF2 - metal response element binding transcription factor 2, EXOSC10 - exosome component 10, NAT10 - n-acetyltransferase 10 (gcn5-related), ZNF451 - zinc finger protein 451, SCFD1 - sec1 family domain contain…
GO:0050657	nucleic acid transport	0.000682	0.0442	2.46	4383	57	626	20	[NMD3 - nmd3 ribosome export adaptor, NUP205 - nucleoporin 205kda, SYMPK - symplekin, NUP133 - nucleoporin 133kda, BICD2 - bicaudal d homolog 2 (drosophila), XPO1 - exportin 1 (crm1 homolog, yeast), WDR33 - wd repeat domain 33, SUPT6H - suppressor of ty 6 homolog (s. cerevisiae), ZC3H3 - zinc finger ccch-type containing 3, SMG6 - smg6 nonsense mediated mrna decay factor, NUP153 - nucleoporin 153k…
GO:0050658	RNA transport	0.000682	0.0444	2.46	4383	57	626	20	[NMD3 - nmd3 ribosome export adaptor, NUP205 - nucleoporin 205kda, SYMPK - symplekin, NUP133 - nucleoporin 133kda, BICD2 - bicaudal d homolog 2 (drosophila), XPO1 - exportin 1 (crm1 homolog, yeast), WDR33 - wd repeat domain 33, SUPT6H - suppressor of ty 6 homolog (s. cerevisiae), ZC3H3 - zinc finger ccch-type containing 3, SMG6 - smg6 nonsense mediated mrna decay factor, NUP153 - nucleoporin 153k…
GO:0051169	nuclear transport	0.000775	0.049	1.88	4383	96	850	35	[TOB1 - transducer of erbb2, 1, NUP205 - nucleoporin 205kda, SYMPK - symplekin, NUP133 - nucleoporin 133kda, XPO1 - exportin 1 (crm1 homolog, yeast), SNUPN - snurportin 1, PIK3R1 - phosphoinositide-3-kinase, regulatory subunit 1 (alpha), AHCYL1 - adenosylhomocysteinase-like 1, RERE - arginine-glutamic acid dipeptide (re) repeats, PML - promyelocytic leukemia, UPF1 - upf1 regulator of nonsense tra…
GO:0033036	macromolecule localization	0.000771	0.0491	1.29	4383	563	982	163	[DHX9 - deah (asp-glu-ala-his) box helicase 9, TOB1 - transducer of erbb2, 1, MAPRE1 - microtubule-associated protein, rp/eb family, member 1, EXOSC10 - exosome component 10, KDELR1 - kdel (lys-asp-glu-leu) endoplasmic reticulum protein retention receptor 1, SPIRE1 - spire actin nucleation factor 1, TBC1D15 - tbc1 domain family, member 15, SCFD1 - sec1 family domain containing 1, TRAK1 - traffick…

## Sheet: kidney, high to low
GO Term	Description	P-value	FDR q-value	Enrichment	N	B	n	b	Genes
GO:0005576	extracellular region	6.52e-17	9.18e-14	2.61	4379	270	547	88	[TIMP2 - timp metallopeptidase inhibitor 2, TCN2 - transcobalamin ii, APOA1 - apolipoprotein a-i, ELN - elastin, PLA2G7 - phospholipase a2, group vii (platelet-activating factor acetylhydrolase, plasma), SPP1 - secreted phosphoprotein 1, IFI30 - interferon, gamma-inducible protein 30, XPNPEP2 - x-prolyl aminopeptidase (aminopeptidase p) 2, membrane-bound, CP - ceruloplasmin (ferroxidase), BST1 - …
GO:0005615	extracellular space	2.14e-13	1.5e-10	2.42	4379	221	605	74	[ARSG - arylsulfatase g, TIMP2 - timp metallopeptidase inhibitor 2, SEMA3G - sema domain, immunoglobulin domain (ig), short basic domain, secreted, (semaphorin) 3g, TCN2 - transcobalamin ii, FABP3 - fatty acid binding protein 3, muscle and heart (mammary-derived growth inhibitor), SEMA4C - sema domain, immunoglobulin domain (ig), transmembrane domain (tm) and short cytoplasmic domain, (semaphorin…
GO:0044281	small molecule metabolic process	1.11e-13	1.19e-09	1.84	4379	515	693	150	[NUDT13 - nudix (nucleoside diphosphate linked moiety x)-type motif 13, TCN2 - transcobalamin ii, PNKD - paroxysmal nonkinesigenic dyskinesia, SCD5 - stearoyl-coa desaturase 5, APOA1 - apolipoprotein a-i, ENTPD8 - ectonucleoside triphosphate diphosphohydrolase 8, FMO2 - flavin containing monooxygenase 2 (non-functional), BPHL - biphenyl hydrolase-like (serine hydrolase), ABCA1 - atp-binding casse…
GO:0044421	extracellular region part	4.07e-12	1.91e-09	1.46	4379	996	772	256	[CD93 - cd93 molecule, CHMP4C - charged multivesicular body protein 4c, SEMA3G - sema domain, immunoglobulin domain (ig), short basic domain, secreted, (semaphorin) 3g, CAB39L - calcium binding protein 39-like, PHLDA3 - pleckstrin homology-like domain, family a, member 3, SEMA4C - sema domain, immunoglobulin domain (ig), transmembrane domain (tm) and short cytoplasmic domain, (semaphorin) 4c, ELN…
GO:0031224	intrinsic component of membrane	1.95e-10	6.88e-08	1.36	4379	1006	988	308	[NIPA2 - non imprinted in prader-willi/angelman syndrome 2, CD93 - cd93 molecule, HVCN1 - hydrogen voltage-gated channel 1, SEMA4C - sema domain, immunoglobulin domain (ig), transmembrane domain (tm) and short cytoplasmic domain, (semaphorin) 4c, SCD5 - stearoyl-coa desaturase 5, DPY19L3 - dpy-19-like 3 (c. elegans), SLC5A12 - solute carrier family 5 (sodium/monocarboxylate cotransporter), member…
GO:0006629	lipid metabolic process	1.72e-10	9.24e-07	1.66	4379	372	988	139	[LGMN - legumain, HSD17B4 - hydroxysteroid (17-beta) dehydrogenase 4, SCD5 - stearoyl-coa desaturase 5, APOA1 - apolipoprotein a-i, HSD11B2 - hydroxysteroid (11-beta) dehydrogenase 2, ABCA1 - atp-binding cassette, sub-family a (abc1), member 1, AMACR - alpha-methylacyl-coa racemase, SPP1 - secreted phosphoprotein 1, GDPD3 - glycerophosphodiester phosphodiesterase domain containing 3, LDLR - low d…
GO:0016021	integral component of membrane	4.35e-09	1.22e-06	1.34	4379	989	988	298	[CD93 - cd93 molecule, NIPA2 - non imprinted in prader-willi/angelman syndrome 2, HVCN1 - hydrogen voltage-gated channel 1, SEMA4C - sema domain, immunoglobulin domain (ig), transmembrane domain (tm) and short cytoplasmic domain, (semaphorin) 4c, SCD5 - stearoyl-coa desaturase 5, DPY19L3 - dpy-19-like 3 (c. elegans), SLC5A12 - solute carrier family 5 (sodium/monocarboxylate cotransporter), member…
GO:0006082	organic acid metabolic process	1.43e-09	5.12e-06	1.92	4379	286	692	87	[MTR - 5-methyltetrahydrofolate-homocysteine methyltransferase, SLC6A6 - solute carrier family 6 (neurotransmitter transporter), member 6, PNKD - paroxysmal nonkinesigenic dyskinesia, ACAA2 - acetyl-coa acyltransferase 2, SCD5 - stearoyl-coa desaturase 5, FABP3 - fatty acid binding protein 3, muscle and heart (mammary-derived growth inhibitor), CHST2 - carbohydrate (n-acetylglucosamine-6-o) sulfo…
GO:0016491	oxidoreductase activity	2.14e-09	6.1e-06	1.87	4379	203	981	85	[HSD17B4 - hydroxysteroid (17-beta) dehydrogenase 4, CYB5R4 - cytochrome b5 reductase 4, SCD5 - stearoyl-coa desaturase 5, HSD11B2 - hydroxysteroid (11-beta) dehydrogenase 2, NDUFA6 - nadh dehydrogenase (ubiquinone) 1 alpha subcomplex, 6, 14kda, FMO2 - flavin containing monooxygenase 2 (non-functional), MICAL1 - microtubule associated monooxygenase, calponin and lim domain containing 1, IFI30 - i…
GO:0015850	organic hydroxy compound transport	5.53e-09	9.91e-06	3.85	4379	38	689	23	[AQP3 - aquaporin 3 (gill blood group), SCARB1 - scavenger receptor class b, member 1, LCAT - lecithin-cholesterol acyltransferase, APOA1 - apolipoprotein a-i, SLC51B - solute carrier family 51, beta subunit, SLC5A12 - solute carrier family 5 (sodium/monocarboxylate cotransporter), member 12, ABCA1 - atp-binding cassette, sub-family a (abc1), member 1, OSBPL6 - oxysterol binding protein-like 6, S…
GO:1903561	extracellular vesicle	5.74e-08	1.01e-05	1.41	4379	842	772	209	[CHMP4C - charged multivesicular body protein 4c, SEMA3G - sema domain, immunoglobulin domain (ig), short basic domain, secreted, (semaphorin) 3g, PHLDA3 - pleckstrin homology-like domain, family a, member 3, CAB39L - calcium binding protein 39-like, BPHL - biphenyl hydrolase-like (serine hydrolase), SLC5A12 - solute carrier family 5 (sodium/monocarboxylate cotransporter), member 12, SPP1 - secre…
GO:0044255	cellular lipid metabolic process	3.89e-09	1.04e-05	1.68	4379	300	988	114	[HSD17B4 - hydroxysteroid (17-beta) dehydrogenase 4, SCD5 - stearoyl-coa desaturase 5, APOA1 - apolipoprotein a-i, AMACR - alpha-methylacyl-coa racemase, FA2H - fatty acid 2-hydroxylase, NAGA - n-acetylgalactosaminidase, alpha-, CD74 - cd74 molecule, major histocompatibility complex, class ii invariant chain, PLCB1 - phospholipase c, beta 1 (phosphoinositide-specific), ELOVL7 - elovl fatty acid e…
GO:0019752	carboxylic acid metabolic process	5.21e-09	1.12e-05	1.95	4379	252	705	79	[MTR - 5-methyltetrahydrofolate-homocysteine methyltransferase, SLC6A6 - solute carrier family 6 (neurotransmitter transporter), member 6, PNKD - paroxysmal nonkinesigenic dyskinesia, ACAA2 - acetyl-coa acyltransferase 2, SCD5 - stearoyl-coa desaturase 5, FABP3 - fatty acid binding protein 3, muscle and heart (mammary-derived growth inhibitor), PSAT1 - phosphoserine aminotransferase 1, BPHL - bip…
GO:0043230	extracellular organelle	5.74e-08	1.15e-05	1.41	4379	842	772	209	[CHMP4C - charged multivesicular body protein 4c, SEMA3G - sema domain, immunoglobulin domain (ig), short basic domain, secreted, (semaphorin) 3g, PHLDA3 - pleckstrin homology-like domain, family a, member 3, CAB39L - calcium binding protein 39-like, BPHL - biphenyl hydrolase-like (serine hydrolase), SLC5A12 - solute carrier family 5 (sodium/monocarboxylate cotransporter), member 12, SPP1 - secre…
GO:0070062	extracellular exosome	5.13e-08	1.2e-05	1.41	4379	836	772	208	[CHMP4C - charged multivesicular body protein 4c, SEMA3G - sema domain, immunoglobulin domain (ig), short basic domain, secreted, (semaphorin) 3g, PHLDA3 - pleckstrin homology-like domain, family a, member 3, CAB39L - calcium binding protein 39-like, BPHL - biphenyl hydrolase-like (serine hydrolase), SLC5A12 - solute carrier family 5 (sodium/monocarboxylate cotransporter), member 12, SPP1 - secre…
GO:0072562	blood microparticle	1.04e-07	1.62e-05	16.52	4379	21	101	8	[IGJ - immunoglobulin j polypeptide, linker protein for immunoglobulin alpha and mu polypeptides, HRG - histidine-rich glycoprotein, FGB - fibrinogen beta chain, SERPINC1 - serpin peptidase inhibitor, clade c (antithrombin), member 1, F2 - coagulation factor ii (thrombin), APOA1 - apolipoprotein a-i, SERPINF2 - serpin peptidase inhibitor, clade f (alpha-2 antiplasmin, pigment epithelium derived f…
GO:0015711	organic anion transport	1.47e-08	2.25e-05	2.58	4379	116	629	43	[SLC6A12 - solute carrier family 6 (neurotransmitter transporter), member 12, SLC38A6 - solute carrier family 38, member 6, MTTP - microsomal triglyceride transfer protein, SLC6A6 - solute carrier family 6 (neurotransmitter transporter), member 6, FABP3 - fatty acid binding protein 3, muscle and heart (mammary-derived growth inhibitor), SLC2A9 - solute carrier family 2 (facilitated glucose transp…
GO:0043436	oxoacid metabolic process	1.87e-08	2.51e-05	1.87	4379	281	692	83	[MTR - 5-methyltetrahydrofolate-homocysteine methyltransferase, SLC6A6 - solute carrier family 6 (neurotransmitter transporter), member 6, PNKD - paroxysmal nonkinesigenic dyskinesia, ACAA2 - acetyl-coa acyltransferase 2, SCD5 - stearoyl-coa desaturase 5, FABP3 - fatty acid binding protein 3, muscle and heart (mammary-derived growth inhibitor), CHST2 - carbohydrate (n-acetylglucosamine-6-o) sulfo…
GO:0055114	oxidation-reduction process	2.29e-08	2.74e-05	1.72	4379	254	984	98	[HSD17B4 - hydroxysteroid (17-beta) dehydrogenase 4, SCD5 - stearoyl-coa desaturase 5, APOA1 - apolipoprotein a-i, HSD11B2 - hydroxysteroid (11-beta) dehydrogenase 2, NDUFA6 - nadh dehydrogenase (ubiquinone) 1 alpha subcomplex, 6, 14kda, FMO2 - flavin containing monooxygenase 2 (non-functional), MICAL1 - microtubule associated monooxygenase, calponin and lim domain containing 1, AMACR - alpha-met…
GO:0042730	fibrinolysis	2.79e-08	3e-05	22.12	4379	6	198	6	[PLAU - plasminogen activator, urokinase, HRG - histidine-rich glycoprotein, FGB - fibrinogen beta chain, F2 - coagulation factor ii (thrombin), SERPINE1 - serpin peptidase inhibitor, clade e (nexin, plasminogen activator inhibitor type 1), member 1, SERPINF2 - serpin peptidase inhibitor, clade f (alpha-2 antiplasmin, pigment epithelium derived factor), member 2]
GO:0034369	plasma lipoprotein particle remodeling	3.97e-08	3.28e-05	6.55	4379	10	669	10	[APOC3 - apolipoprotein c-iii, APOM - apolipoprotein m, SCARB1 - scavenger receptor class b, member 1, APOE - apolipoprotein e, LCAT - lecithin-cholesterol acyltransferase, APOA1 - apolipoprotein a-i, ALB - albumin, PLA2G7 - phospholipase a2, group vii (platelet-activating factor acetylhydrolase, plasma), LPL - lipoprotein lipase, PLTP - phospholipid transfer protein]
GO:0034368	protein-lipid complex remodeling	3.97e-08	3.55e-05	6.55	4379	10	669	10	[APOC3 - apolipoprotein c-iii, APOM - apolipoprotein m, APOE - apolipoprotein e, SCARB1 - scavenger receptor class b, member 1, LCAT - lecithin-cholesterol acyltransferase, ALB - albumin, APOA1 - apolipoprotein a-i, LPL - lipoprotein lipase, PLA2G7 - phospholipase a2, group vii (platelet-activating factor acetylhydrolase, plasma), PLTP - phospholipid transfer protein]
GO:0034367	macromolecular complex remodeling	3.97e-08	3.87e-05	6.55	4379	10	669	10	[APOC3 - apolipoprotein c-iii, APOM - apolipoprotein m, SCARB1 - scavenger receptor class b, member 1, APOE - apolipoprotein e, LCAT - lecithin-cholesterol acyltransferase, APOA1 - apolipoprotein a-i, ALB - albumin, PLA2G7 - phospholipase a2, group vii (platelet-activating factor acetylhydrolase, plasma), LPL - lipoprotein lipase, PLTP - phospholipid transfer protein]
GO:0015718	monocarboxylic acid transport	2.1e-07	0.000141	3.76	4379	37	629	20	[SLC6A12 - solute carrier family 6 (neurotransmitter transporter), member 12, SLCO3A1 - solute carrier organic anion transporter family, member 3a1, SLC16A12 - solute carrier family 16, member 12, FABP3 - fatty acid binding protein 3, muscle and heart (mammary-derived growth inhibitor), SLC51B - solute carrier family 51, beta subunit, FABP1 - fatty acid binding protein 1, liver, SLC5A12 - solute …
GO:0006869	lipid transport	1.84e-07	0.000142	2.81	4379	70	689	31	[MTTP - microsomal triglyceride transfer protein, FABP3 - fatty acid binding protein 3, muscle and heart (mammary-derived growth inhibitor), GLTPD2 - glycolipid transfer protein domain containing 2, APOA1 - apolipoprotein a-i, FABP1 - fatty acid binding protein 1, liver, ABCA1 - atp-binding cassette, sub-family a (abc1), member 1, ATP10D - atpase, class v, type 10d, ACSL1 - acyl-coa synthetase lo…
GO:0015849	organic acid transport	2.05e-07	0.000147	2.9	4379	72	629	30	[SLC6A12 - solute carrier family 6 (neurotransmitter transporter), member 12, SLC38A6 - solute carrier family 38, member 6, SLC6A6 - solute carrier family 6 (neurotransmitter transporter), member 6, FABP3 - fatty acid binding protein 3, muscle and heart (mammary-derived growth inhibitor), SLC26A7 - solute carrier family 26 (anion exchanger), member 7, SLC2A9 - solute carrier family 2 (facilitated…
GO:0005887	integral component of plasma membrane	1.14e-06	0.00016	1.73	4379	246	811	79	[SLC6A12 - solute carrier family 6 (neurotransmitter transporter), member 12, SLC38A6 - solute carrier family 38, member 6, SLC6A6 - solute carrier family 6 (neurotransmitter transporter), member 6, HVCN1 - hydrogen voltage-gated channel 1, SLC26A7 - solute carrier family 26 (anion exchanger), member 7, PVRL3 - poliovirus receptor-related 3, ABCA1 - atp-binding cassette, sub-family a (abc1), memb…
GO:0006820	anion transport	2.62e-07	0.000166	2.18	4379	149	689	51	[SLC6A12 - solute carrier family 6 (neurotransmitter transporter), member 12, SLC38A6 - solute carrier family 38, member 6, MTTP - microsomal triglyceride transfer protein, SLC6A6 - solute carrier family 6 (neurotransmitter transporter), member 6, FABP3 - fatty acid binding protein 3, muscle and heart (mammary-derived growth inhibitor), APOA1 - apolipoprotein a-i, SLC26A7 - solute carrier family …
GO:0031974	membrane-enclosed lumen	1.89e-06	0.00019	1.51	4379	377	956	124	[NUDT13 - nudix (nucleoside diphosphate linked moiety x)-type motif 13, GOLIM4 - golgi integral membrane protein 4, LGMN - legumain, TCN2 - transcobalamin ii, HSD17B4 - hydroxysteroid (17-beta) dehydrogenase 4, CEP89 - centrosomal protein 89kda, APOA1 - apolipoprotein a-i, CDH2 - cadherin 2, type 1, n-cadherin (neuronal), AMACR - alpha-methylacyl-coa racemase, SPP1 - secreted phosphoprotein 1, CP…
GO:0031226	intrinsic component of plasma membrane	1.49e-06	0.000191	1.7	4379	260	811	82	[SLC6A12 - solute carrier family 6 (neurotransmitter transporter), member 12, SLC38A6 - solute carrier family 38, member 6, SLC6A6 - solute carrier family 6 (neurotransmitter transporter), member 6, HVCN1 - hydrogen voltage-gated channel 1, SLC26A7 - solute carrier family 26 (anion exchanger), member 7, PVRL3 - poliovirus receptor-related 3, ABCA1 - atp-binding cassette, sub-family a (abc1), memb…
GO:0070013	intracellular organelle lumen	1.89e-06	0.000205	1.51	4379	377	956	124	[NUDT13 - nudix (nucleoside diphosphate linked moiety x)-type motif 13, GOLIM4 - golgi integral membrane protein 4, LGMN - legumain, TCN2 - transcobalamin ii, HSD17B4 - hydroxysteroid (17-beta) dehydrogenase 4, CEP89 - centrosomal protein 89kda, APOA1 - apolipoprotein a-i, CDH2 - cadherin 2, type 1, n-cadherin (neuronal), AMACR - alpha-methylacyl-coa racemase, SPP1 - secreted phosphoprotein 1, CP…
GO:0043233	organelle lumen	1.89e-06	0.000222	1.51	4379	377	956	124	[NUDT13 - nudix (nucleoside diphosphate linked moiety x)-type motif 13, GOLIM4 - golgi integral membrane protein 4, LGMN - legumain, TCN2 - transcobalamin ii, HSD17B4 - hydroxysteroid (17-beta) dehydrogenase 4, CEP89 - centrosomal protein 89kda, APOA1 - apolipoprotein a-i, CDH2 - cadherin 2, type 1, n-cadherin (neuronal), AMACR - alpha-methylacyl-coa racemase, SPP1 - secreted phosphoprotein 1, CP…
GO:0046942	carboxylic acid transport	5.94e-07	0.000336	2.84	4379	71	629	29	[SLC6A12 - solute carrier family 6 (neurotransmitter transporter), member 12, SLC38A6 - solute carrier family 38, member 6, SLC6A6 - solute carrier family 6 (neurotransmitter transporter), member 6, FABP3 - fatty acid binding protein 3, muscle and heart (mammary-derived growth inhibitor), SLC26A7 - solute carrier family 26 (anion exchanger), member 7, FABP1 - fatty acid binding protein 1, liver, …
GO:0006959	humoral immune response	5.7e-07	0.00034	13.24	4379	21	126	8	[RGCC - regulator of cell cycle, BST1 - bone marrow stromal cell antigen 1, IGJ - immunoglobulin j polypeptide, linker protein for immunoglobulin alpha and mu polypeptides, HRG - histidine-rich glycoprotein, RARRES2 - retinoic acid receptor responder (tazarotene induced) 2, FGB - fibrinogen beta chain, F2 - coagulation factor ii (thrombin), C8G - complement component 8, gamma polypeptide]
GO:0005886	plasma membrane	3.91e-06	0.000367	1.28	4379	909	998	266	[CD93 - cd93 molecule, NIPA2 - non imprinted in prader-willi/angelman syndrome 2, LRRC45 - leucine rich repeat containing 45, HVCN1 - hydrogen voltage-gated channel 1, CEP89 - centrosomal protein 89kda, PHLDA3 - pleckstrin homology-like domain, family a, member 3, SLC5A12 - solute carrier family 5 (sodium/monocarboxylate cotransporter), member 12, ABCA1 - atp-binding cassette, sub-family a (abc1)…
GO:0019433	triglyceride catabolic process	1.12e-06	0.0006	6.79	4379	8	645	8	[APOC3 - apolipoprotein c-iii, MGLL - monoglyceride lipase, APOE - apolipoprotein e, PNPLA4 - patatin-like phospholipase domain containing 4, FABP3 - fatty acid binding protein 3, muscle and heart (mammary-derived growth inhibitor), APOA1 - apolipoprotein a-i, FABP1 - fatty acid binding protein 1, liver, LPL - lipoprotein lipase]
GO:0034375	high-density lipoprotein particle remodeling	1.52e-06	0.00071	6.55	4379	8	669	8	[APOC3 - apolipoprotein c-iii, APOM - apolipoprotein m, APOE - apolipoprotein e, SCARB1 - scavenger receptor class b, member 1, LCAT - lecithin-cholesterol acyltransferase, ALB - albumin, APOA1 - apolipoprotein a-i, PLTP - phospholipid transfer protein]
GO:0032787	monocarboxylic acid metabolic process	1.39e-06	0.000711	1.99	4379	128	913	53	[PNKD - paroxysmal nonkinesigenic dyskinesia, ACAA2 - acetyl-coa acyltransferase 2, HSD17B4 - hydroxysteroid (17-beta) dehydrogenase 4, SCD5 - stearoyl-coa desaturase 5, FABP3 - fatty acid binding protein 3, muscle and heart (mammary-derived growth inhibitor), AMACR - alpha-methylacyl-coa racemase, ACSL1 - acyl-coa synthetase long-chain family member 1, FA2H - fatty acid 2-hydroxylase, CD74 - cd7…
GO:0001523	retinoid metabolic process	1.48e-06	0.000721	8.11	4379	27	200	10	[DGAT2 - diacylglycerol o-acyltransferase 2, TTR - transthyretin, STRA6 - stimulated by retinoic acid 6, APOC3 - apolipoprotein c-iii, RBP4 - retinol binding protein 4, plasma, APOM - apolipoprotein m, GPC3 - glypican 3, RARRES2 - retinoic acid receptor responder (tazarotene induced) 2, APOA1 - apolipoprotein a-i, LPL - lipoprotein lipase]
GO:0006811	ion transport	1.81e-06	0.000811	1.68	4379	303	738	86	[NIPA2 - non imprinted in prader-willi/angelman syndrome 2, SLC6A12 - solute carrier family 6 (neurotransmitter transporter), member 12, SLC38A6 - solute carrier family 38, member 6, TOMM40 - translocase of outer mitochondrial membrane 40 homolog (yeast), MTTP - microsomal triglyceride transfer protein, SLC6A6 - solute carrier family 6 (neurotransmitter transporter), member 6, HVCN1 - hydrogen vo…
GO:1901568	fatty acid derivative metabolic process	3.24e-06	0.00129	3.7	4379	41	520	18	[MGLL - monoglyceride lipase, SCD5 - stearoyl-coa desaturase 5, HPGD - hydroxyprostaglandin dehydrogenase 15-(nad), CBR4 - carbonyl reductase 4, PON3 - paraoxonase 3, DGAT2 - diacylglycerol o-acyltransferase 2, FADS1 - fatty acid desaturase 1, ACSL1 - acyl-coa synthetase long-chain family member 1, CD74 - cd74 molecule, major histocompatibility complex, class ii invariant chain, PTPLB - protein t…
GO:1901615	organic hydroxy compound metabolic process	3.19e-06	0.00132	1.94	4379	120	978	52	[LGMN - legumain, PNKD - paroxysmal nonkinesigenic dyskinesia, ACAA2 - acetyl-coa acyltransferase 2, HSD17B4 - hydroxysteroid (17-beta) dehydrogenase 4, APOA1 - apolipoprotein a-i, PSAT1 - phosphoserine aminotransferase 1, AMACR - alpha-methylacyl-coa racemase, ABCA1 - atp-binding cassette, sub-family a (abc1), member 1, PNPO - pyridoxamine 5'-phosphate oxidase, LDLR - low density lipoprotein rec…
GO:0044283	small molecule biosynthetic process	3.17e-06	0.00136	1.9	4379	129	981	55	[MTR - 5-methyltetrahydrofolate-homocysteine methyltransferase, ACAA2 - acetyl-coa acyltransferase 2, HSD17B4 - hydroxysteroid (17-beta) dehydrogenase 4, SCD5 - stearoyl-coa desaturase 5, APOA1 - apolipoprotein a-i, PSAT1 - phosphoserine aminotransferase 1, AMACR - alpha-methylacyl-coa racemase, PNPO - pyridoxamine 5'-phosphate oxidase, SERINC5 - serine incorporator 5, FA2H - fatty acid 2-hydroxy…
GO:0071827	plasma lipoprotein particle organization	3.79e-06	0.00141	4.62	4379	17	669	12	[APOC3 - apolipoprotein c-iii, MTTP - microsomal triglyceride transfer protein, APOM - apolipoprotein m, APOE - apolipoprotein e, SCARB1 - scavenger receptor class b, member 1, LCAT - lecithin-cholesterol acyltransferase, ALB - albumin, APOA1 - apolipoprotein a-i, ABCA1 - atp-binding cassette, sub-family a (abc1), member 1, LPL - lipoprotein lipase, PLA2G7 - phospholipase a2, group vii (platelet-…
GO:0071825	protein-lipid complex subunit organization	3.79e-06	0.00146	4.62	4379	17	669	12	[APOC3 - apolipoprotein c-iii, MTTP - microsomal triglyceride transfer protein, APOM - apolipoprotein m, APOE - apolipoprotein e, SCARB1 - scavenger receptor class b, member 1, LCAT - lecithin-cholesterol acyltransferase, ALB - albumin, APOA1 - apolipoprotein a-i, ABCA1 - atp-binding cassette, sub-family a (abc1), member 1, LPL - lipoprotein lipase, PLA2G7 - phospholipase a2, group vii (platelet-…
GO:0044425	membrane part	2e-05	0.00166	1.19	4379	1421	998	387	[HVCN1 - hydrogen voltage-gated channel 1, SCD5 - stearoyl-coa desaturase 5, ATAT1 - alpha tubulin acetyltransferase 1, SLC5A12 - solute carrier family 5 (sodium/monocarboxylate cotransporter), member 12, ABCA1 - atp-binding cassette, sub-family a (abc1), member 1, VPS37A - vacuolar protein sorting 37 homolog a (s. cerevisiae), GEM - gtp binding protein overexpressed in skeletal muscle, FAM151A -…
GO:0072376	protein activation cascade	5.21e-06	0.00181	4.62	4379	11	862	10	[RGCC - regulator of cell cycle, PRCP - prolylcarboxypeptidase (angiotensinase c), FGB - fibrinogen beta chain, VWF - von willebrand factor, F2 - coagulation factor ii (thrombin), C1QA - complement component 1, q subcomponent, a chain, C1RL - complement component 1, r subcomponent-like, TFPI - tissue factor pathway inhibitor (lipoprotein-associated coagulation inhibitor), FBLN1 - fibulin 1, C8G -…
GO:0016101	diterpenoid metabolic process	5.08e-06	0.00182	7.3	4379	30	200	10	[DGAT2 - diacylglycerol o-acyltransferase 2, TTR - transthyretin, STRA6 - stimulated by retinoic acid 6, APOC3 - apolipoprotein c-iii, RBP4 - retinol binding protein 4, plasma, APOM - apolipoprotein m, GPC3 - glypican 3, RARRES2 - retinoic acid receptor responder (tazarotene induced) 2, APOA1 - apolipoprotein a-i, LPL - lipoprotein lipase]
GO:0019835	cytolysis	6.98e-06	0.00227	18.62	4379	7	168	5	[GSDMD - gasdermin d, HRG - histidine-rich glycoprotein, F2 - coagulation factor ii (thrombin), ALB - albumin, C8G - complement component 8, gamma polypeptide]
GO:0019730	antimicrobial humoral response	6.94e-06	0.00233	13.9	4379	10	189	6	[IGJ - immunoglobulin j polypeptide, linker protein for immunoglobulin alpha and mu polypeptides, BCL3 - b-cell cll/lymphoma 3, HRG - histidine-rich glycoprotein, RARRES2 - retinoic acid receptor responder (tazarotene induced) 2, FGB - fibrinogen beta chain, F2 - coagulation factor ii (thrombin)]
GO:0043691	reverse cholesterol transport	8.47e-06	0.00268	6.55	4379	7	669	7	[APOC3 - apolipoprotein c-iii, APOM - apolipoprotein m, APOE - apolipoprotein e, SCARB1 - scavenger receptor class b, member 1, LCAT - lecithin-cholesterol acyltransferase, APOA1 - apolipoprotein a-i, ABCA1 - atp-binding cassette, sub-family a (abc1), member 1]
GO:0098869	cellular oxidant detoxification	9.22e-06	0.00275	9.34	4379	23	163	8	[SRXN1 - sulfiredoxin 1, APOM - apolipoprotein m, SOD3 - superoxide dismutase 3, extracellular, GPX2 - glutathione peroxidase 2 (gastrointestinal), ALB - albumin, FABP1 - fatty acid binding protein 1, liver, TP53INP1 - tumor protein p53 inducible nuclear protein 1, MGST1 - microsomal glutathione s-transferase 1]
GO:0006721	terpenoid metabolic process	9.69e-06	0.00281	6.84	4379	32	200	10	[DGAT2 - diacylglycerol o-acyltransferase 2, TTR - transthyretin, STRA6 - stimulated by retinoic acid 6, APOC3 - apolipoprotein c-iii, RBP4 - retinol binding protein 4, plasma, APOM - apolipoprotein m, GPC3 - glypican 3, RARRES2 - retinoic acid receptor responder (tazarotene induced) 2, APOA1 - apolipoprotein a-i, LPL - lipoprotein lipase]
GO:1990748	cellular detoxification	9.22e-06	0.00283	9.34	4379	23	163	8	[SRXN1 - sulfiredoxin 1, APOM - apolipoprotein m, SOD3 - superoxide dismutase 3, extracellular, GPX2 - glutathione peroxidase 2 (gastrointestinal), ALB - albumin, FABP1 - fatty acid binding protein 1, liver, TP53INP1 - tumor protein p53 inducible nuclear protein 1, MGST1 - microsomal glutathione s-transferase 1]
GO:0031225	anchored component of membrane	4.69e-05	0.00366	3.06	4379	22	977	15	[GPC3 - glypican 3, PRNP - prion protein, LPL - lipoprotein lipase, XPNPEP2 - x-prolyl aminopeptidase (aminopeptidase p) 2, membrane-bound, PRSS8 - protease, serine, 8, BST1 - bone marrow stromal cell antigen 1, UMOD - uromodulin, ENPP6 - ectonucleotide pyrophosphatase/phosphodiesterase 6, TREH - trehalase (brush-border membrane glycoprotein), GPC4 - glypican 4, THY1 - thy-1 cell surface antigen,…
GO:0016209	antioxidant activity	6.47e-06	0.00368	9.77	4379	22	163	8	[SRXN1 - sulfiredoxin 1, APOM - apolipoprotein m, SOD3 - superoxide dismutase 3, extracellular, GPX2 - glutathione peroxidase 2 (gastrointestinal), ALB - albumin, TP53INP1 - tumor protein p53 inducible nuclear protein 1, FABP1 - fatty acid binding protein 1, liver, MGST1 - microsomal glutathione s-transferase 1]
GO:0005319	lipid transporter activity	6.19e-06	0.00439	3.44	4379	37	620	18	[MTTP - microsomal triglyceride transfer protein, GLTPD2 - glycolipid transfer protein domain containing 2, FABP3 - fatty acid binding protein 3, muscle and heart (mammary-derived growth inhibitor), APOA1 - apolipoprotein a-i, FABP1 - fatty acid binding protein 1, liver, ABCA1 - atp-binding cassette, sub-family a (abc1), member 1, OSBPL8 - oxysterol binding protein-like 8, ATP10D - atpase, class …
GO:0005578	proteinaceous extracellular matrix	6.78e-05	0.00477	2.43	4379	43	963	23	[LTBP4 - latent transforming growth factor beta binding protein 4, MMP2 - matrix metallopeptidase 2 (gelatinase a, 72kda gelatinase, 72kda type iv collagenase), COL6A3 - collagen, type vi, alpha 3, TIMP2 - timp metallopeptidase inhibitor 2, LAMC3 - laminin, gamma 3, GPC3 - glypican 3, CRISPLD2 - cysteine-rich secretory protein lccl domain containing 2, ELN - elastin, COL6A1 - collagen, type vi, a…
GO:0060205	cytoplasmic vesicle lumen	7.13e-05	0.00478	3.67	4379	95	201	16	[TTR - transthyretin, CTSH - cathepsin h, APOA1 - apolipoprotein a-i, APOOL - apolipoprotein o-like, GSDMD - gasdermin d, CLEC3B - c-type lectin domain family 3, member b, HSP90B1 - heat shock protein 90kda beta (grp94), member 1, HRG - histidine-rich glycoprotein, RARRES2 - retinoic acid receptor responder (tazarotene induced) 2, FGB - fibrinogen beta chain, SERPINE1 - serpin peptidase inhibitor…
GO:0031982	vesicle	7.66e-05	0.0049	1.26	4379	1093	772	243	[NIPA2 - non imprinted in prader-willi/angelman syndrome 2, CHMP4C - charged multivesicular body protein 4c, SEMA3G - sema domain, immunoglobulin domain (ig), short basic domain, secreted, (semaphorin) 3g, PHLDA3 - pleckstrin homology-like domain, family a, member 3, CAB39L - calcium binding protein 39-like, BPHL - biphenyl hydrolase-like (serine hydrolase), SLC5A12 - solute carrier family 5 (sod…
GO:0006641	triglyceride metabolic process	1.76e-05	0.00498	4.01	4379	22	645	13	[MGLL - monoglyceride lipase, PNPLA4 - patatin-like phospholipase domain containing 4, FABP3 - fatty acid binding protein 3, muscle and heart (mammary-derived growth inhibitor), APOA1 - apolipoprotein a-i, FABP1 - fatty acid binding protein 1, liver, LPL - lipoprotein lipase, ACSL1 - acyl-coa synthetase long-chain family member 1, PTPN11 - protein tyrosine phosphatase, non-receptor type 11, DGAT2…
GO:0048878	chemical homeostasis	1.85e-05	0.0051	1.71	4379	262	674	69	[FABP3 - fatty acid binding protein 3, muscle and heart (mammary-derived growth inhibitor), SLC26A7 - solute carrier family 26 (anion exchanger), member 7, APOA1 - apolipoprotein a-i, ABCA1 - atp-binding cassette, sub-family a (abc1), member 1, TTC7A - tetratricopeptide repeat domain 7a, CP - ceruloplasmin (ferroxidase), LRRK2 - leucine-rich repeat kinase 2, TMEM97 - transmembrane protein 97, IRS…
GO:0031983	vesicle lumen	8.41e-05	0.00515	3.63	4379	96	201	16	[TTR - transthyretin, CTSH - cathepsin h, APOA1 - apolipoprotein a-i, APOOL - apolipoprotein o-like, GSDMD - gasdermin d, CLEC3B - c-type lectin domain family 3, member b, HSP90B1 - heat shock protein 90kda beta (grp94), member 1, HRG - histidine-rich glycoprotein, RARRES2 - retinoic acid receptor responder (tazarotene induced) 2, FGB - fibrinogen beta chain, SERPINE1 - serpin peptidase inhibitor…
GO:0005215	transporter activity	5.52e-06	0.00523	1.62	4379	318	765	90	[NIPA2 - non imprinted in prader-willi/angelman syndrome 2, SLC6A12 - solute carrier family 6 (neurotransmitter transporter), member 12, SLC38A6 - solute carrier family 38, member 6, TOMM40 - translocase of outer mitochondrial membrane 40 homolog (yeast), MTTP - microsomal triglyceride transfer protein, SLC6A6 - solute carrier family 6 (neurotransmitter transporter), member 6, HVCN1 - hydrogen vo…
GO:0042632	cholesterol homeostasis	2.06e-05	0.00528	3.71	4379	24	689	14	[SCARB1 - scavenger receptor class b, member 1, FABP3 - fatty acid binding protein 3, muscle and heart (mammary-derived growth inhibitor), LCAT - lecithin-cholesterol acyltransferase, APOA1 - apolipoprotein a-i, ABCA1 - atp-binding cassette, sub-family a (abc1), member 1, LPL - lipoprotein lipase, DGAT2 - diacylglycerol o-acyltransferase 2, LDLR - low density lipoprotein receptor, APOC3 - apolipo…
GO:0098754	detoxification	2.01e-05	0.00539	8.6	4379	25	163	8	[SRXN1 - sulfiredoxin 1, APOM - apolipoprotein m, SOD3 - superoxide dismutase 3, extracellular, GPX2 - glutathione peroxidase 2 (gastrointestinal), ALB - albumin, TP53INP1 - tumor protein p53 inducible nuclear protein 1, FABP1 - fatty acid binding protein 1, liver, MGST1 - microsomal glutathione s-transferase 1]
GO:0055092	sterol homeostasis	2.06e-05	0.00541	3.71	4379	24	689	14	[SCARB1 - scavenger receptor class b, member 1, FABP3 - fatty acid binding protein 3, muscle and heart (mammary-derived growth inhibitor), LCAT - lecithin-cholesterol acyltransferase, APOA1 - apolipoprotein a-i, ABCA1 - atp-binding cassette, sub-family a (abc1), member 1, LPL - lipoprotein lipase, DGAT2 - diacylglycerol o-acyltransferase 2, LDLR - low density lipoprotein receptor, APOC3 - apolipo…
GO:0015291	secondary active transmembrane transporter activity	1.15e-05	0.00544	2.63	4379	73	617	27	[SLC6A12 - solute carrier family 6 (neurotransmitter transporter), member 12, SLC6A6 - solute carrier family 6 (neurotransmitter transporter), member 6, SLC26A7 - solute carrier family 26 (anion exchanger), member 7, SLC2A9 - solute carrier family 2 (facilitated glucose transporter), member 9, SLCO4C1 - solute carrier organic anion transporter family, member 4c1, SLC22A18 - solute carrier family …
GO:0006805	xenobiotic metabolic process	2.22e-05	0.00554	4.23	4379	15	760	11	[ACSL1 - acyl-coa synthetase long-chain family member 1, EPHX2 - epoxide hydrolase 2, cytoplasmic, NQO1 - nad(p)h dehydrogenase, quinone 1, NCEH1 - neutral cholesterol ester hydrolase 1, CYP1B1 - cytochrome p450, family 1, subfamily b, polypeptide 1, FMO2 - flavin containing monooxygenase 2 (non-functional), BPHL - biphenyl hydrolase-like (serine hydrolase), MGST1 - microsomal glutathione s-trans…
GO:0034364	high-density lipoprotein particle	0.000101	0.00591	7.04	4379	7	533	6	[APOC3 - apolipoprotein c-iii, APOM - apolipoprotein m, APOE - apolipoprotein e, LCAT - lecithin-cholesterol acyltransferase, APOA1 - apolipoprotein a-i, ABCA1 - atp-binding cassette, sub-family a (abc1), member 1]
GO:0008514	organic anion transmembrane transporter activity	4.2e-06	0.00597	2.94	4379	58	617	24	[SLC6A12 - solute carrier family 6 (neurotransmitter transporter), member 12, SLC25A29 - solute carrier family 25 (mitochondrial carnitine/acylcarnitine carrier), member 29, SLC38A6 - solute carrier family 38, member 6, SLCO3A1 - solute carrier organic anion transporter family, member 3a1, SLC6A6 - solute carrier family 6 (neurotransmitter transporter), member 6, SLCO4A1 - solute carrier organic …
GO:0033559	unsaturated fatty acid metabolic process	2.61e-05	0.00637	3.27	4379	19	988	14	[MGLL - monoglyceride lipase, ELOVL5 - elovl fatty acid elongase 5, HSD17B4 - hydroxysteroid (17-beta) dehydrogenase 4, SCD5 - stearoyl-coa desaturase 5, HPGD - hydroxyprostaglandin dehydrogenase 15-(nad), FADS1 - fatty acid desaturase 1, ACSL1 - acyl-coa synthetase long-chain family member 1, CD74 - cd74 molecule, major histocompatibility complex, class ii invariant chain, EPHX2 - epoxide hydrol…
GO:0046394	carboxylic acid biosynthetic process	2.79e-05	0.00653	2.21	4379	70	907	32	[ACOX2 - acyl-coa oxidase 2, branched chain, MTR - 5-methyltetrahydrofolate-homocysteine methyltransferase, HSD17B4 - hydroxysteroid (17-beta) dehydrogenase 4, AGXT2 - alanine--glyoxylate aminotransferase 2, SCD5 - stearoyl-coa desaturase 5, PSAT1 - phosphoserine aminotransferase 1, AMACR - alpha-methylacyl-coa racemase, HYAL1 - hyaluronoglucosaminidase 1, SERINC5 - serine incorporator 5, FA2H - …
GO:0022892	substrate-specific transporter activity	2.77e-05	0.00657	1.71	4379	276	620	67	[NIPA2 - non imprinted in prader-willi/angelman syndrome 2, SLC6A12 - solute carrier family 6 (neurotransmitter transporter), member 12, TOMM40 - translocase of outer mitochondrial membrane 40 homolog (yeast), SLC38A6 - solute carrier family 38, member 6, MTTP - microsomal triglyceride transfer protein, SLC6A6 - solute carrier family 6 (neurotransmitter transporter), member 6, FABP3 - fatty acid …
GO:0015293	symporter activity	2.32e-05	0.00659	2.45	4379	46	972	25	[SLC6A12 - solute carrier family 6 (neurotransmitter transporter), member 12, SLC6A6 - solute carrier family 6 (neurotransmitter transporter), member 6, SLC2A9 - solute carrier family 2 (facilitated glucose transporter), member 9, SLC5A12 - solute carrier family 5 (sodium/monocarboxylate cotransporter), member 12, SLC22A18 - solute carrier family 22, member 18, SLC16A5 - solute carrier family 16 …
GO:0004497	monooxygenase activity	2.58e-05	0.00667	3.58	4379	15	978	12	[SQLE - squalene epoxidase, CYP20A1 - cytochrome p450, family 20, subfamily a, polypeptide 1, CYP39A1 - cytochrome p450, family 39, subfamily a, polypeptide 1, MSMO1 - methylsterol monooxygenase 1, PCBD1 - pterin-4 alpha-carbinolamine dehydratase/dimerization cofactor of hepatocyte nuclear factor 1 alpha, PCBD2 - pterin-4 alpha-carbinolamine dehydratase/dimerization cofactor of hepatocyte nuclear…
GO:0016053	organic acid biosynthetic process	2.79e-05	0.00667	2.21	4379	70	907	32	[ACOX2 - acyl-coa oxidase 2, branched chain, MTR - 5-methyltetrahydrofolate-homocysteine methyltransferase, HSD17B4 - hydroxysteroid (17-beta) dehydrogenase 4, AGXT2 - alanine--glyoxylate aminotransferase 2, SCD5 - stearoyl-coa desaturase 5, PSAT1 - phosphoserine aminotransferase 1, AMACR - alpha-methylacyl-coa racemase, HYAL1 - hyaluronoglucosaminidase 1, SERINC5 - serine incorporator 5, FA2H - …
GO:0005539	glycosaminoglycan binding	3.32e-05	0.00674	2.92	4379	46	652	20	[IGJ - immunoglobulin j polypeptide, linker protein for immunoglobulin alpha and mu polypeptides, CRISPLD2 - cysteine-rich secretory protein lccl domain containing 2, FGF9 - fibroblast growth factor 9, APLP1 - amyloid beta (a4) precursor-like protein 1, PRNP - prion protein, LPL - lipoprotein lipase, PCSK6 - proprotein convertase subtilisin/kexin type 6, FGF1 - fibroblast growth factor 1 (acidic)…
GO:0044282	small molecule catabolic process	2.96e-05	0.00677	1.85	4379	120	988	50	[PNKD - paroxysmal nonkinesigenic dyskinesia, ACAA2 - acetyl-coa acyltransferase 2, HSD17B4 - hydroxysteroid (17-beta) dehydrogenase 4, ENTPD8 - ectonucleoside triphosphate diphosphohydrolase 8, AMACR - alpha-methylacyl-coa racemase, ALDH4A1 - aldehyde dehydrogenase 4 family, member a1, FAH - fumarylacetoacetate hydrolase (fumarylacetoacetase), GK5 - glycerol kinase 5 (putative), CYP39A1 - cytoch…
GO:0008509	anion transmembrane transporter activity	1.71e-05	0.00693	2.45	4379	87	617	30	[SLC6A12 - solute carrier family 6 (neurotransmitter transporter), member 12, SLC38A6 - solute carrier family 38, member 6, SLC6A6 - solute carrier family 6 (neurotransmitter transporter), member 6, LRRC8B - leucine rich repeat containing 8 family, member b, SLC26A7 - solute carrier family 26 (anion exchanger), member 7, SLC2A9 - solute carrier family 2 (facilitated glucose transporter), member 9…
GO:0022857	transmembrane transporter activity	2.22e-05	0.00702	1.7	4379	225	765	67	[NIPA2 - non imprinted in prader-willi/angelman syndrome 2, SLC6A12 - solute carrier family 6 (neurotransmitter transporter), member 12, TOMM40 - translocase of outer mitochondrial membrane 40 homolog (yeast), SLC38A6 - solute carrier family 38, member 6, SLC6A6 - solute carrier family 6 (neurotransmitter transporter), member 6, HVCN1 - hydrogen voltage-gated channel 1, NIPAL2 - nipa-like domain …
GO:0005342	organic acid transmembrane transporter activity	3.25e-05	0.0071	3.26	4379	37	617	17	[SLC6A12 - solute carrier family 6 (neurotransmitter transporter), member 12, SLC38A6 - solute carrier family 38, member 6, SLC25A29 - solute carrier family 25 (mitochondrial carnitine/acylcarnitine carrier), member 29, SLC6A6 - solute carrier family 6 (neurotransmitter transporter), member 6, SLC16A12 - solute carrier family 16, member 12, SLC1A5 - solute carrier family 1 (neutral amino acid tra…
GO:0008028	monocarboxylic acid transmembrane transporter activity	2.04e-05	0.00724	5.32	4379	12	617	9	[SLCO2A1 - solute carrier organic anion transporter family, member 2a1, SLC6A12 - solute carrier family 6 (neurotransmitter transporter), member 12, SLC10A2 - solute carrier family 10 (sodium/bile acid cotransporter), member 2, SLC16A12 - solute carrier family 16, member 12, SLC16A7 - solute carrier family 16 (monocarboxylate transporter), member 7, SLC16A1 - solute carrier family 16 (monocarboxy…
GO:0034358	plasma lipoprotein particle	0.000145	0.00784	4.4	4379	13	689	9	[LDLR - low density lipoprotein receptor, APOC3 - apolipoprotein c-iii, APOM - apolipoprotein m, APOE - apolipoprotein e, LCAT - lecithin-cholesterol acyltransferase, APOA1 - apolipoprotein a-i, ABCA1 - atp-binding cassette, sub-family a (abc1), member 1, LPL - lipoprotein lipase, PLA2G7 - phospholipase a2, group vii (platelet-activating factor acetylhydrolase, plasma)]
GO:1990777	lipoprotein particle	0.000145	0.00815	4.4	4379	13	689	9	[LDLR - low density lipoprotein receptor, APOC3 - apolipoprotein c-iii, APOM - apolipoprotein m, APOE - apolipoprotein e, LCAT - lecithin-cholesterol acyltransferase, APOA1 - apolipoprotein a-i, ABCA1 - atp-binding cassette, sub-family a (abc1), member 1, LPL - lipoprotein lipase, PLA2G7 - phospholipase a2, group vii (platelet-activating factor acetylhydrolase, plasma)]
GO:0034774	secretory granule lumen	0.00016	0.00831	3.63	4379	90	201	15	[TTR - transthyretin, CTSH - cathepsin h, APOA1 - apolipoprotein a-i, APOOL - apolipoprotein o-like, GSDMD - gasdermin d, CLEC3B - c-type lectin domain family 3, member b, HRG - histidine-rich glycoprotein, RARRES2 - retinoic acid receptor responder (tazarotene induced) 2, FGB - fibrinogen beta chain, SERPINE1 - serpin peptidase inhibitor, clade e (nexin, plasminogen activator inhibitor type 1), …
GO:0008610	lipid biosynthetic process	4.01e-05	0.00879	1.66	4379	186	936	66	[PLEKHA1 - pleckstrin homology domain containing, family a (phosphoinositide binding specific) member 1, ACAA2 - acetyl-coa acyltransferase 2, HSD17B4 - hydroxysteroid (17-beta) dehydrogenase 4, SCD5 - stearoyl-coa desaturase 5, APOA1 - apolipoprotein a-i, HSD11B2 - hydroxysteroid (11-beta) dehydrogenase 2, AMACR - alpha-methylacyl-coa racemase, SERINC5 - serine incorporator 5, ACSL1 - acyl-coa s…
GO:0015075	ion transmembrane transporter activity	4.91e-05	0.00929	1.76	4379	191	728	56	[NIPA2 - non imprinted in prader-willi/angelman syndrome 2, SLC6A12 - solute carrier family 6 (neurotransmitter transporter), member 12, SLC38A6 - solute carrier family 38, member 6, SLC6A6 - solute carrier family 6 (neurotransmitter transporter), member 6, HVCN1 - hydrogen voltage-gated channel 1, NIPAL2 - nipa-like domain containing 2, SLC26A7 - solute carrier family 26 (anion exchanger), membe…
GO:0031093	platelet alpha granule lumen	0.000212	0.0106	7.37	4379	21	198	7	[HRG - histidine-rich glycoprotein, FGB - fibrinogen beta chain, SERPINE1 - serpin peptidase inhibitor, clade e (nexin, plasminogen activator inhibitor type 1), member 1, ALB - albumin, SERPINF2 - serpin peptidase inhibitor, clade f (alpha-2 antiplasmin, pigment epithelium derived factor), member 2, F5 - coagulation factor v (proaccelerin, labile factor), APOOL - apolipoprotein o-like]
GO:0002576	platelet degranulation	4.94e-05	0.0106	5.82	4379	38	198	10	[CLEC3B - c-type lectin domain family 3, member b, RARRES2 - retinoic acid receptor responder (tazarotene induced) 2, HRG - histidine-rich glycoprotein, FGB - fibrinogen beta chain, SERPINE1 - serpin peptidase inhibitor, clade e (nexin, plasminogen activator inhibitor type 1), member 1, ALB - albumin, APOA1 - apolipoprotein a-i, SERPINF2 - serpin peptidase inhibitor, clade f (alpha-2 antiplasmin,…
GO:0031012	extracellular matrix	0.000236	0.0114	1.87	4379	102	917	40	[CD93 - cd93 molecule, CPXM2 - carboxypeptidase x (m14 family), member 2, TIMP2 - timp metallopeptidase inhibitor 2, CRISPLD2 - cysteine-rich secretory protein lccl domain containing 2, ELN - elastin, FGF1 - fibroblast growth factor 1 (acidic), COL1A1 - collagen, type i, alpha 1, CTGF - connective tissue growth factor, RPS11 - ribosomal protein s11, RARRES2 - retinoic acid receptor responder (taz…
GO:0033993	response to lipid	6.17e-05	0.013	1.72	4379	186	793	58	[PAQR7 - progestin and adipoq receptor family member vii, SBNO2 - strawberry notch homolog 2 (drosophila), FABP3 - fatty acid binding protein 3, muscle and heart (mammary-derived growth inhibitor), HNRNPA0 - heterogeneous nuclear ribonucleoprotein a0, HSD11B2 - hydroxysteroid (11-beta) dehydrogenase 2, ABCA1 - atp-binding cassette, sub-family a (abc1), member 1, SPP1 - secreted phosphoprotein 1, …
GO:0007584	response to nutrient	6.35e-05	0.0131	2.55	4379	52	760	23	[AQP3 - aquaporin 3 (gill blood group), IGFBP2 - insulin-like growth factor binding protein 2, 36kda, APOA1 - apolipoprotein a-i, ARSB - arylsulfatase b, ABCA1 - atp-binding cassette, sub-family a (abc1), member 1, SPP1 - secreted phosphoprotein 1, POR - p450 (cytochrome) oxidoreductase, COL1A1 - collagen, type i, alpha 1, ACSL1 - acyl-coa synthetase long-chain family member 1, KYNU - kynureninas…
GO:0022891	substrate-specific transmembrane transporter activity	7.66e-05	0.0136	1.71	4379	207	728	59	[NIPA2 - non imprinted in prader-willi/angelman syndrome 2, SLC6A12 - solute carrier family 6 (neurotransmitter transporter), member 12, TOMM40 - translocase of outer mitochondrial membrane 40 homolog (yeast), SLC38A6 - solute carrier family 38, member 6, SLC6A6 - solute carrier family 6 (neurotransmitter transporter), member 6, HVCN1 - hydrogen voltage-gated channel 1, SLC26A7 - solute carrier f…
GO:0006720	isoprenoid metabolic process	6.94e-05	0.0141	5.61	4379	39	200	10	[DGAT2 - diacylglycerol o-acyltransferase 2, TTR - transthyretin, STRA6 - stimulated by retinoic acid 6, APOC3 - apolipoprotein c-iii, RBP4 - retinol binding protein 4, plasma, APOM - apolipoprotein m, GPC3 - glypican 3, RARRES2 - retinoic acid receptor responder (tazarotene induced) 2, APOA1 - apolipoprotein a-i, LPL - lipoprotein lipase]
GO:0043202	lysosomal lumen	0.000304	0.0142	2.62	4379	31	917	17	[NEU1 - sialidase 1 (lysosomal sialidase), CTSK - cathepsin k, LGMN - legumain, GPC3 - glypican 3, TCN2 - transcobalamin ii, CTSB - cathepsin b, ARSB - arylsulfatase b, ARSA - arylsulfatase a, HYAL1 - hyaluronoglucosaminidase 1, IFI30 - interferon, gamma-inducible protein 30, GALNS - galactosamine (n-acetyl)-6-sulfate sulfatase, CD74 - cd74 molecule, major histocompatibility complex, class ii inv…
GO:0042445	hormone metabolic process	7.74e-05	0.0146	2.54	4379	39	927	21	[IYD - iodotyrosine deiodinase, TTR - transthyretin, HSD17B7 - hydroxysteroid (17-beta) dehydrogenase 7, PLEKHA1 - pleckstrin homology domain containing, family a (phosphoinositide binding specific) member 1, MME - membrane metallo-endopeptidase, SCARB1 - scavenger receptor class b, member 1, HSD17B4 - hydroxysteroid (17-beta) dehydrogenase 4, PNPLA4 - patatin-like phospholipase domain containing…
GO:0046943	carboxylic acid transmembrane transporter activity	9.83e-05	0.0155	3.15	4379	36	617	16	[SLC6A12 - solute carrier family 6 (neurotransmitter transporter), member 12, SLC38A6 - solute carrier family 38, member 6, SLC25A29 - solute carrier family 25 (mitochondrial carnitine/acylcarnitine carrier), member 29, SLC6A6 - solute carrier family 6 (neurotransmitter transporter), member 6, SLC16A12 - solute carrier family 16, member 12, SLC1A5 - solute carrier family 1 (neutral amino acid tra…
GO:0032994	protein-lipid complex	0.000353	0.016	4.09	4379	14	689	9	[LDLR - low density lipoprotein receptor, APOC3 - apolipoprotein c-iii, APOM - apolipoprotein m, APOE - apolipoprotein e, LCAT - lecithin-cholesterol acyltransferase, APOA1 - apolipoprotein a-i, ABCA1 - atp-binding cassette, sub-family a (abc1), member 1, LPL - lipoprotein lipase, PLA2G7 - phospholipase a2, group vii (platelet-activating factor acetylhydrolase, plasma)]
GO:0006631	fatty acid metabolic process	9.78e-05	0.0167	2.01	4379	86	913	36	[ACOX2 - acyl-coa oxidase 2, branched chain, ACAA2 - acetyl-coa acyltransferase 2, HSD17B4 - hydroxysteroid (17-beta) dehydrogenase 4, SCD5 - stearoyl-coa desaturase 5, FABP3 - fatty acid binding protein 3, muscle and heart (mammary-derived growth inhibitor), AMACR - alpha-methylacyl-coa racemase, ACSL1 - acyl-coa synthetase long-chain family member 1, FA2H - fatty acid 2-hydroxylase, CD74 - cd74…
GO:0006732	coenzyme metabolic process	9.13e-05	0.0169	2.01	4379	84	936	36	[THTPA - thiamine triphosphatase, ACOT13 - acyl-coa thioesterase 13, HSD17B4 - hydroxysteroid (17-beta) dehydrogenase 4, NMRK1 - nicotinamide riboside kinase 1, SCD5 - stearoyl-coa desaturase 5, FMO2 - flavin containing monooxygenase 2 (non-functional), PNPO - pyridoxamine 5'-phosphate oxidase, ALDOC - aldolase c, fructose-bisphosphate, ACSL1 - acyl-coa synthetase long-chain family member 1, BST1…
GO:0034370	triglyceride-rich lipoprotein particle remodeling	9.44e-05	0.0172	8.22	4379	5	533	5	[APOC3 - apolipoprotein c-iii, APOE - apolipoprotein e, LCAT - lecithin-cholesterol acyltransferase, APOA1 - apolipoprotein a-i, LPL - lipoprotein lipase]
GO:0044270	cellular nitrogen compound catabolic process	0.000103	0.0173	4.35	4379	119	110	13	[DNASE1L3 - deoxyribonuclease i-like 3, PDE8A - phosphodiesterase 8a, RPL15 - ribosomal protein l15, PPP1R8 - protein phosphatase 1, regulatory subunit 8, RPS11 - ribosomal protein s11, DNPH1 - 2'-deoxynucleoside 5'-phosphate n-hydrolase 1, AOX1 - aldehyde oxidase 1, KHSRP - kh-type splicing regulatory protein, SMPDL3A - sphingomyelin phosphodiesterase, acid-like 3a, PDE4C - phosphodiesterase 4c,…
GO:0006790	sulfur compound metabolic process	0.000127	0.0195	1.87	4379	102	964	42	[NOX4 - nadph oxidase 4, ARSG - arylsulfatase g, THTPA - thiamine triphosphatase, MTR - 5-methyltetrahydrofolate-homocysteine methyltransferase, ACOT13 - acyl-coa thioesterase 13, HSD17B4 - hydroxysteroid (17-beta) dehydrogenase 4, SCD5 - stearoyl-coa desaturase 5, CHST2 - carbohydrate (n-acetylglucosamine-6-o) sulfotransferase 2, ARSB - arylsulfatase b, MICAL1 - microtubule associated monooxygen…
GO:0009308	amine metabolic process	0.000127	0.0197	4.24	4379	16	646	10	[KYNU - kynureninase, SARDH - sarcosine dehydrogenase, DHPS - deoxyhypusine synthase, OAZ2 - ornithine decarboxylase antizyme 2, DMGDH - dimethylglycine dehydrogenase, CHDH - choline dehydrogenase, AFMID - arylformamidase, MAOA - monoamine oxidase a, SAT2 - spermidine/spermine n1-acetyltransferase family member 2, KMO - kynurenine 3-monooxygenase (kynurenine 3-hydroxylase)]
GO:0044106	cellular amine metabolic process	0.000127	0.02	4.24	4379	16	646	10	[KYNU - kynureninase, SARDH - sarcosine dehydrogenase, DHPS - deoxyhypusine synthase, OAZ2 - ornithine decarboxylase antizyme 2, DMGDH - dimethylglycine dehydrogenase, CHDH - choline dehydrogenase, AFMID - arylformamidase, MAOA - monoamine oxidase a, SAT2 - spermidine/spermine n1-acetyltransferase family member 2, KMO - kynurenine 3-monooxygenase (kynurenine 3-hydroxylase)]
GO:0043252	sodium-independent organic anion transport	0.000135	0.0201	4.51	4379	7	971	7	[SLCO2A1 - solute carrier organic anion transporter family, member 2a1, SLCO3A1 - solute carrier organic anion transporter family, member 3a1, SLCO4A1 - solute carrier organic anion transporter family, member 4a1, ALB - albumin, SLCO4C1 - solute carrier organic anion transporter family, member 4c1, MFSD10 - major facilitator superfamily domain containing 10, SLCO2B1 - solute carrier organic anion…
GO:0019637	organophosphate metabolic process	0.000134	0.0202	1.68	4379	280	577	62	[APOA1 - apolipoprotein a-i, FMO2 - flavin containing monooxygenase 2 (non-functional), ENTPD8 - ectonucleoside triphosphate diphosphohydrolase 8, PLA2G7 - phospholipase a2, group vii (platelet-activating factor acetylhydrolase, plasma), PNPO - pyridoxamine 5'-phosphate oxidase, NME3 - nme/nm23 nucleoside diphosphate kinase 3, DNPH1 - 2'-deoxynucleoside 5'-phosphate n-hydrolase 1, BST1 - bone mar…
GO:0006576	cellular biogenic amine metabolic process	0.000127	0.0203	4.24	4379	16	646	10	[KYNU - kynureninase, SARDH - sarcosine dehydrogenase, DHPS - deoxyhypusine synthase, OAZ2 - ornithine decarboxylase antizyme 2, DMGDH - dimethylglycine dehydrogenase, CHDH - choline dehydrogenase, AFMID - arylformamidase, MAOA - monoamine oxidase a, SAT2 - spermidine/spermine n1-acetyltransferase family member 2, KMO - kynurenine 3-monooxygenase (kynurenine 3-hydroxylase)]
GO:0033628	regulation of cell adhesion mediated by integrin	0.000139	0.0204	9.29	4379	14	202	6	[PLAU - plasminogen activator, urokinase, PTPN11 - protein tyrosine phosphatase, non-receptor type 11, FERMT1 - fermitin family member 1, HRG - histidine-rich glycoprotein, SERPINE1 - serpin peptidase inhibitor, clade e (nexin, plasminogen activator inhibitor type 1), member 1, PDE3B - phosphodiesterase 3b, cgmp-inhibited]
GO:0015721	bile acid and bile salt transport	0.000126	0.0205	5.06	4379	11	629	8	[SLC10A2 - solute carrier family 10 (sodium/bile acid cotransporter), member 2, SLC51A - solute carrier family 51, alpha subunit, NR1H4 - nuclear receptor subfamily 1, group h, member 4, SLC51B - solute carrier family 51, beta subunit, ALB - albumin, STARD5 - star-related lipid transfer (start) domain containing 5, STARD10 - star-related lipid transfer (start) domain containing 10, SLCO2B1 - solu…
GO:0008201	heparin binding	0.00014	0.021	5.8	4379	34	200	9	[FGF1 - fibroblast growth factor 1 (acidic), CLEC3B - c-type lectin domain family 3, member b, SOD3 - superoxide dismutase 3, extracellular, HRG - histidine-rich glycoprotein, F2 - coagulation factor ii (thrombin), SERPINC1 - serpin peptidase inhibitor, clade c (antithrombin), member 1, APLP1 - amyloid beta (a4) precursor-like protein 1, LPL - lipoprotein lipase, BMP7 - bone morphogenetic protein…
GO:0046464	acylglycerol catabolic process	0.00015	0.0215	4.94	4379	11	645	8	[MGLL - monoglyceride lipase, APOC3 - apolipoprotein c-iii, PNPLA4 - patatin-like phospholipase domain containing 4, APOE - apolipoprotein e, FABP3 - fatty acid binding protein 3, muscle and heart (mammary-derived growth inhibitor), APOA1 - apolipoprotein a-i, FABP1 - fatty acid binding protein 1, liver, LPL - lipoprotein lipase]
GO:0046461	neutral lipid catabolic process	0.00015	0.0218	4.94	4379	11	645	8	[APOC3 - apolipoprotein c-iii, MGLL - monoglyceride lipase, APOE - apolipoprotein e, PNPLA4 - patatin-like phospholipase domain containing 4, FABP3 - fatty acid binding protein 3, muscle and heart (mammary-derived growth inhibitor), APOA1 - apolipoprotein a-i, FABP1 - fatty acid binding protein 1, liver, LPL - lipoprotein lipase]
GO:0009986	cell surface	0.000594	0.0239	1.86	4379	128	716	39	[PKD1 - polycystic kidney disease 1 (autosomal dominant), CD93 - cd93 molecule, TIMP2 - timp metallopeptidase inhibitor 2, FZD5 - frizzled family receptor 5, CXCR4 - chemokine (c-x-c motif) receptor 4, TYROBP - tyro protein tyrosine kinase binding protein, ITGA8 - integrin, alpha 8, APOA1 - apolipoprotein a-i, ANTXR1 - anthrax toxin receptor 1, ARSB - arylsulfatase b, PRNP - prion protein, CRYAB …
GO:0016788	hydrolase activity, acting on ester bonds	0.000208	0.0256	1.75	4379	226	577	52	[ARSG - arylsulfatase g, ACOT13 - acyl-coa thioesterase 13, PNKD - paroxysmal nonkinesigenic dyskinesia, NCEH1 - neutral cholesterol ester hydrolase 1, PLA2G7 - phospholipase a2, group vii (platelet-activating factor acetylhydrolase, plasma), GDPD3 - glycerophosphodiester phosphodiesterase domain containing 3, INPP5J - inositol polyphosphate-5-phosphatase j, ABHD1 - abhydrolase domain containing …
GO:0015347	sodium-independent organic anion transmembrane transporter activity	0.000196	0.0265	7.1	4379	5	617	5	[SLCO2A1 - solute carrier organic anion transporter family, member 2a1, SLCO3A1 - solute carrier organic anion transporter family, member 3a1, SLCO4A1 - solute carrier organic anion transporter family, member 4a1, SLCO4C1 - solute carrier organic anion transporter family, member 4c1, SLCO2B1 - solute carrier organic anion transporter family, member 2b1]
GO:0030195	negative regulation of blood coagulation	0.0002	0.0265	8.85	4379	15	198	6	[PLAU - plasminogen activator, urokinase, HRG - histidine-rich glycoprotein, FGB - fibrinogen beta chain, F2 - coagulation factor ii (thrombin), SERPINE1 - serpin peptidase inhibitor, clade e (nexin, plasminogen activator inhibitor type 1), member 1, SERPINF2 - serpin peptidase inhibitor, clade f (alpha-2 antiplasmin, pigment epithelium derived factor), member 2]
GO:1900047	negative regulation of hemostasis	0.0002	0.0268	8.85	4379	15	198	6	[PLAU - plasminogen activator, urokinase, HRG - histidine-rich glycoprotein, FGB - fibrinogen beta chain, F2 - coagulation factor ii (thrombin), SERPINE1 - serpin peptidase inhibitor, clade e (nexin, plasminogen activator inhibitor type 1), member 1, SERPINF2 - serpin peptidase inhibitor, clade f (alpha-2 antiplasmin, pigment epithelium derived factor), member 2]
GO:1901570	fatty acid derivative biosynthetic process	0.000199	0.027	3.74	4379	27	520	12	[FADS1 - fatty acid desaturase 1, ACSL1 - acyl-coa synthetase long-chain family member 1, CD74 - cd74 molecule, major histocompatibility complex, class ii invariant chain, PTPLB - protein tyrosine phosphatase-like (proline instead of catalytic arginine), member b, SCD5 - stearoyl-coa desaturase 5, ACSS3 - acyl-coa synthetase short-chain family member 3, ELOVL7 - elovl fatty acid elongase 7, CBR4 …
GO:0043178	alcohol binding	0.000191	0.0272	13.9	4379	25	63	5	[RBP4 - retinol binding protein 4, plasma, APOC3 - apolipoprotein c-iii, APOD - apolipoprotein d, APOA1 - apolipoprotein a-i, C8G - complement component 8, gamma polypeptide]
GO:1903035	negative regulation of response to wounding	0.000259	0.034	9.36	4379	23	122	6	[PLAU - plasminogen activator, urokinase, HRG - histidine-rich glycoprotein, FGB - fibrinogen beta chain, F2 - coagulation factor ii (thrombin), SERPINF2 - serpin peptidase inhibitor, clade f (alpha-2 antiplasmin, pigment epithelium derived factor), member 2, SPP1 - secreted phosphoprotein 1]
GO:0016042	lipid catabolic process	0.000272	0.0348	1.97	4379	84	899	34	[NEU1 - sialidase 1 (lysosomal sialidase), ACOX2 - acyl-coa oxidase 2, branched chain, ACAA2 - acetyl-coa acyltransferase 2, HSD17B4 - hydroxysteroid (17-beta) dehydrogenase 4, FABP3 - fatty acid binding protein 3, muscle and heart (mammary-derived growth inhibitor), APOA1 - apolipoprotein a-i, FABP1 - fatty acid binding protein 1, liver, NCEH1 - neutral cholesterol ester hydrolase 1, SCARF1 - sc…
GO:1903825	organic acid transmembrane transport	0.000271	0.0351	3.35	4379	28	606	13	[SLC6A12 - solute carrier family 6 (neurotransmitter transporter), member 12, SLC38A6 - solute carrier family 38, member 6, SLC25A29 - solute carrier family 25 (mitochondrial carnitine/acylcarnitine carrier), member 29, SLC6A6 - solute carrier family 6 (neurotransmitter transporter), member 6, SLC16A12 - solute carrier family 16, member 12, SLC1A5 - solute carrier family 1 (neutral amino acid tra…
GO:0045055	regulated exocytosis	0.000278	0.0352	2.15	4379	182	335	30	[NEU1 - sialidase 1 (lysosomal sialidase), TIMP2 - timp metallopeptidase inhibitor 2, TYROBP - tyro protein tyrosine kinase binding protein, APOA1 - apolipoprotein a-i, SLCO4C1 - solute carrier organic anion transporter family, member 4c1, FGL2 - fibrinogen-like 2, ALDOC - aldolase c, fructose-bisphosphate, APOOL - apolipoprotein o-like, PLAU - plasminogen activator, urokinase, BST1 - bone marrow…
GO:1901361	organic cyclic compound catabolic process	0.000313	0.0378	3.92	4379	132	110	13	[DNASE1L3 - deoxyribonuclease i-like 3, PDE8A - phosphodiesterase 8a, RPL15 - ribosomal protein l15, SPP1 - secreted phosphoprotein 1, PPP1R8 - protein phosphatase 1, regulatory subunit 8, RPS11 - ribosomal protein s11, DNPH1 - 2'-deoxynucleoside 5'-phosphate n-hydrolase 1, AOX1 - aldehyde oxidase 1, KHSRP - kh-type splicing regulatory protein, SMPDL3A - sphingomyelin phosphodiesterase, acid-like…
GO:0046889	positive regulation of lipid biosynthetic process	0.000303	0.0378	2.98	4379	32	689	15	[SCARB1 - scavenger receptor class b, member 1, ELOVL5 - elovl fatty acid elongase 5, FABP3 - fatty acid binding protein 3, muscle and heart (mammary-derived growth inhibitor), APOA1 - apolipoprotein a-i, POR - p450 (cytochrome) oxidoreductase, FGF1 - fibroblast growth factor 1 (acidic), DGAT2 - diacylglycerol o-acyltransferase 2, LDLR - low density lipoprotein receptor, CYR61 - cysteine-rich, an…
GO:0050819	negative regulation of coagulation	0.000321	0.0384	8.29	4379	16	198	6	[PLAU - plasminogen activator, urokinase, HRG - histidine-rich glycoprotein, FGB - fibrinogen beta chain, F2 - coagulation factor ii (thrombin), SERPINE1 - serpin peptidase inhibitor, clade e (nexin, plasminogen activator inhibitor type 1), member 1, SERPINF2 - serpin peptidase inhibitor, clade f (alpha-2 antiplasmin, pigment epithelium derived factor), member 2]
GO:0050661	NADP binding	0.00038	0.04	4.29	4379	16	574	9	[DHCR7 - 7-dehydrocholesterol reductase, SRD5A1 - steroid-5-alpha-reductase, alpha polypeptide 1 (3-oxo-5 alpha-steroid delta 4-dehydrogenase alpha 1), CRYM - crystallin, mu, FMO2 - flavin containing monooxygenase 2 (non-functional), CBR4 - carbonyl reductase 4, FASN - fatty acid synthase, TP53I3 - tumor protein p53 inducible protein 3, POR - p450 (cytochrome) oxidoreductase, FMO3 - flavin contai…
GO:0072330	monocarboxylic acid biosynthetic process	0.000354	0.0404	2.31	4379	46	907	22	[ACOX2 - acyl-coa oxidase 2, branched chain, MGLL - monoglyceride lipase, HSD3B7 - hydroxy-delta-5-steroid dehydrogenase, 3 beta- and steroid delta-isomerase 7, HSD17B4 - hydroxysteroid (17-beta) dehydrogenase 4, ELOVL5 - elovl fatty acid elongase 5, SCD5 - stearoyl-coa desaturase 5, CBR4 - carbonyl reductase 4, LPL - lipoprotein lipase, AMACR - alpha-methylacyl-coa racemase, OSBPL6 - oxysterol b…
GO:0030301	cholesterol transport	0.000352	0.0407	4.09	4379	14	689	9	[LDLR - low density lipoprotein receptor, APOC3 - apolipoprotein c-iii, APOM - apolipoprotein m, APOE - apolipoprotein e, SCARB1 - scavenger receptor class b, member 1, LCAT - lecithin-cholesterol acyltransferase, APOA1 - apolipoprotein a-i, ABCA1 - atp-binding cassette, sub-family a (abc1), member 1, STARD5 - star-related lipid transfer (start) domain containing 5]
GO:0009310	amine catabolic process	0.00038	0.0416	4.52	4379	12	646	8	[KYNU - kynureninase, SARDH - sarcosine dehydrogenase, DHPS - deoxyhypusine synthase, DMGDH - dimethylglycine dehydrogenase, CHDH - choline dehydrogenase, AFMID - arylformamidase, SAT2 - spermidine/spermine n1-acetyltransferase family member 2, KMO - kynurenine 3-monooxygenase (kynurenine 3-hydroxylase)]
GO:0031102	neuron projection regeneration	0.000375	0.042	4.87	4379	9	699	7	[MTR - 5-methyltetrahydrofolate-homocysteine methyltransferase, BCL2 - b-cell cll/lymphoma 2, APOD - apolipoprotein d, APOE - apolipoprotein e, ADM - adrenomedullin, JUN - jun proto-oncogene, APOA1 - apolipoprotein a-i]
GO:0042402	cellular biogenic amine catabolic process	0.00038	0.0421	4.52	4379	12	646	8	[KYNU - kynureninase, SARDH - sarcosine dehydrogenase, DHPS - deoxyhypusine synthase, DMGDH - dimethylglycine dehydrogenase, CHDH - choline dehydrogenase, AFMID - arylformamidase, SAT2 - spermidine/spermine n1-acetyltransferase family member 2, KMO - kynurenine 3-monooxygenase (kynurenine 3-hydroxylase)]
GO:0046903	secretion	0.000397	0.0423	1.9	4379	275	336	40	[NEU1 - sialidase 1 (lysosomal sialidase), TIMP2 - timp metallopeptidase inhibitor 2, MTTP - microsomal triglyceride transfer protein, TYROBP - tyro protein tyrosine kinase binding protein, SLC26A7 - solute carrier family 26 (anion exchanger), member 7, APOA1 - apolipoprotein a-i, SLCO4C1 - solute carrier organic anion transporter family, member 4c1, FGL2 - fibrinogen-like 2, ABCA1 - atp-binding …
GO:0072524	pyridine-containing compound metabolic process	0.000414	0.0428	3.06	4379	31	646	14	[PCK2 - phosphoenolpyruvate carboxykinase 2 (mitochondrial), PSAT1 - phosphoserine aminotransferase 1, FMO2 - flavin containing monooxygenase 2 (non-functional), PNPO - pyridoxamine 5'-phosphate oxidase, ALDOC - aldolase c, fructose-bisphosphate, NAPRT1 - nicotinate phosphoribosyltransferase domain containing 1, KYNU - kynureninase, BST1 - bone marrow stromal cell antigen 1, AOX1 - aldehyde oxida…
GO:0004857	enzyme inhibitor activity	0.000461	0.0437	2.95	4379	76	332	17	[TIMP2 - timp metallopeptidase inhibitor 2, PPP1R14D - protein phosphatase 1, regulatory (inhibitor) subunit 14d, OAZ2 - ornithine decarboxylase antizyme 2, GPC3 - glypican 3, SOCS3 - suppressor of cytokine signaling 3, APOA1 - apolipoprotein a-i, PPP1R1B - protein phosphatase 1, regulatory (inhibitor) subunit 1b, ANXA3 - annexin a3, PPP1R8 - protein phosphatase 1, regulatory subunit 8, APOC3 - a…
GO:1901618	organic hydroxy compound transmembrane transporter activity	0.000479	0.0439	4.98	4379	10	616	7	[AQP3 - aquaporin 3 (gill blood group), SLC10A2 - solute carrier family 10 (sodium/bile acid cotransporter), member 2, SLC22A1 - solute carrier family 22 (organic cation transporter), member 1, SLC16A1 - solute carrier family 16 (monocarboxylate transporter), member 1, SLC16A7 - solute carrier family 16 (monocarboxylate transporter), member 7, SLC5A12 - solute carrier family 5 (sodium/monocarboxy…
GO:0001540	amyloid-beta binding	0.000433	0.0439	3.74	4379	17	689	10	[APBB3 - amyloid beta (a4) precursor protein-binding, family b, member 3, LDLR - low density lipoprotein receptor, CD74 - cd74 molecule, major histocompatibility complex, class ii invariant chain, FZD5 - frizzled family receptor 5, APOE - apolipoprotein e, SCARB1 - scavenger receptor class b, member 1, LDLRAD3 - low density lipoprotein receptor class a domain containing 3, APOA1 - apolipoprotein …
GO:0055088	lipid homeostasis	0.000453	0.0459	2.7	4379	40	689	17	[PNPLA4 - patatin-like phospholipase domain containing 4, SCARB1 - scavenger receptor class b, member 1, FABP3 - fatty acid binding protein 3, muscle and heart (mammary-derived growth inhibitor), LCAT - lecithin-cholesterol acyltransferase, APOA1 - apolipoprotein a-i, ABCA1 - atp-binding cassette, sub-family a (abc1), member 1, LPL - lipoprotein lipase, DGAT2 - diacylglycerol o-acyltransferase 2,…
GO:0046700	heterocycle catabolic process	0.000471	0.0468	4.05	4379	118	110	12	[DNASE1L3 - deoxyribonuclease i-like 3, RPS11 - ribosomal protein s11, PPP1R8 - protein phosphatase 1, regulatory subunit 8, DNPH1 - 2'-deoxynucleoside 5'-phosphate n-hydrolase 1, PDE8A - phosphodiesterase 8a, KHSRP - kh-type splicing regulatory protein, AOX1 - aldehyde oxidase 1, SMPDL3A - sphingomyelin phosphodiesterase, acid-like 3a, PDE4C - phosphodiesterase 4c, camp-specific, AFMID - arylfor…
GO:1901617	organic hydroxy compound biosynthetic process	0.000492	0.0468	2.24	4379	44	978	22	[ACOX2 - acyl-coa oxidase 2, branched chain, HSD17B7 - hydroxysteroid (17-beta) dehydrogenase 7, HSD3B7 - hydroxy-delta-5-steroid dehydrogenase, 3 beta- and steroid delta-isomerase 7, PCK1 - phosphoenolpyruvate carboxykinase 1 (soluble), ACAA2 - acetyl-coa acyltransferase 2, FDFT1 - farnesyl-diphosphate farnesyltransferase 1, HSD17B4 - hydroxysteroid (17-beta) dehydrogenase 4, APOA1 - apolipoprot…
GO:0006639	acylglycerol metabolic process	0.000515	0.0469	5.54	4379	28	226	8	[PTPN11 - protein tyrosine phosphatase, non-receptor type 11, DGAT2 - diacylglycerol o-acyltransferase 2, ACSL1 - acyl-coa synthetase long-chain family member 1, APOC3 - apolipoprotein c-iii, MGLL - monoglyceride lipase, APOA1 - apolipoprotein a-i, FABP1 - fatty acid binding protein 1, liver, LPL - lipoprotein lipase]
GO:0006636	unsaturated fatty acid biosynthetic process	0.000491	0.0471	4.26	4379	8	899	7	[FADS1 - fatty acid desaturase 1, CD74 - cd74 molecule, major histocompatibility complex, class ii invariant chain, ELOVL5 - elovl fatty acid elongase 5, FADS2 - fatty acid desaturase 2, SCD5 - stearoyl-coa desaturase 5, DECR2 - 2,4-dienoyl coa reductase 2, peroxisomal, PTGES - prostaglandin e synthase]
GO:0006638	neutral lipid metabolic process	0.000515	0.0473	5.54	4379	28	226	8	[PTPN11 - protein tyrosine phosphatase, non-receptor type 11, DGAT2 - diacylglycerol o-acyltransferase 2, ACSL1 - acyl-coa synthetase long-chain family member 1, APOC3 - apolipoprotein c-iii, MGLL - monoglyceride lipase, APOA1 - apolipoprotein a-i, FABP1 - fatty acid binding protein 1, liver, LPL - lipoprotein lipase]
GO:0046503	glycerolipid catabolic process	0.00049	0.0474	3.77	4379	18	645	10	[ENPP2 - ectonucleotide pyrophosphatase/phosphodiesterase 2, APOC3 - apolipoprotein c-iii, MGLL - monoglyceride lipase, APOE - apolipoprotein e, PNPLA4 - patatin-like phospholipase domain containing 4, ENPP6 - ectonucleotide pyrophosphatase/phosphodiesterase 6, FABP3 - fatty acid binding protein 3, muscle and heart (mammary-derived growth inhibitor), APOA1 - apolipoprotein a-i, FABP1 - fatty acid…
GO:0032101	regulation of response to external stimulus	0.000486	0.0475	3.2	4379	161	136	16	[APOA1 - apolipoprotein a-i, NFKBIL1 - nuclear factor of kappa light polypeptide gene enhancer in b-cells inhibitor-like 1, PLA2G7 - phospholipase a2, group vii (platelet-activating factor acetylhydrolase, plasma), SPP1 - secreted phosphoprotein 1, PLAU - plasminogen activator, urokinase, FGF1 - fibroblast growth factor 1 (acidic), BST1 - bone marrow stromal cell antigen 1, CD74 - cd74 molecule, …
GO:0006575	cellular modified amino acid metabolic process	0.000486	0.0479	2.25	4379	45	951	22	[IYD - iodotyrosine deiodinase, PLA1A - phospholipase a1 member a, OPLAH - 5-oxoprolinase (atp-hydrolysing), GATM - glycine amidinotransferase (l-arginine:glycine amidinotransferase), EGLN3 - egl-9 family hypoxia-inducible factor 3, GGH - gamma-glutamyl hydrolase (conjugase, folylpolygammaglutamyl hydrolase), OSBPL8 - oxysterol binding protein-like 8, SERINC5 - serine incorporator 5, HOGA1 - 4-hy…

## Sheet: liver, low to high
GO Term	Description	P-value	FDR q-value	Enrichment	N	B	n	b	Genes
GO:0003676	nucleic acid binding	2.68e-20	7.63e-17	1.51	3743	863	990	344	[MARK2 - map/microtubule affinity-regulating kinase 2, NCBP1 - nuclear cap binding protein subunit 1, 80kda, DHX58 - dexh (asp-glu-x-his) box polypeptide 58, TSN - translin, EXOSC10 - exosome component 10, POLR3D - polymerase (rna) iii (dna directed) polypeptide d, 44kda, NCOA5 - nuclear receptor coactivator 5, MBNL2 - muscleblind-like splicing regulator 2, CDKN2AIP - cdkn2a interacting protein, …
GO:0032991	macromolecular complex	1.52e-16	2.04e-13	1.35	3743	1312	952	450	[AFG3L2 - afg3 atpase family member 3-like 2 (s. cerevisiae), EXOSC10 - exosome component 10, AAMP - angio-associated, migratory cell protein, CD2AP - cd2-associated protein, FBXO18 - f-box protein, helicase, 18, OS9 - osteosarcoma amplified 9, endoplasmic reticulum lectin, ABCF1 - atp-binding cassette, sub-family f (gcn20), member 1, RABGAP1 - rab gtpase activating protein 1, SPG7 - spastic para…
GO:0003723	RNA binding	2.74e-15	3.9e-12	1.73	3743	519	766	184	[DHX9 - deah (asp-glu-ala-his) box helicase 9, DHX8 - deah (asp-glu-ala-his) box polypeptide 8, DHX36 - deah (asp-glu-ala-his) box polypeptide 36, PNISR - pnn-interacting serine/arginine-rich protein, NCBP1 - nuclear cap binding protein subunit 1, 80kda, DHX58 - dexh (asp-glu-x-his) box polypeptide 58, MARK2 - map/microtubule affinity-regulating kinase 2, TSN - translin, EXOSC10 - exosome compone…
GO:0005654	nucleoplasm	6.7e-15	4.51e-12	1.45	3743	876	952	322	[EMD - emerin, MAPKAP1 - mitogen-activated protein kinase associated protein 1, VEZT - vezatin, adherens junctions transmembrane protein, NCBP1 - nuclear cap binding protein subunit 1, 80kda, MARK2 - map/microtubule affinity-regulating kinase 2, EXOSC10 - exosome component 10, POLR3D - polymerase (rna) iii (dna directed) polypeptide d, 44kda, MBNL2 - muscleblind-like splicing regulator 2, CDKN2AI…
GO:0090304	nucleic acid metabolic process	6.08e-16	6.29e-12	1.46	3743	851	964	321	[NCBP1 - nuclear cap binding protein subunit 1, 80kda, TSN - translin, EXOSC10 - exosome component 10, POLR3D - polymerase (rna) iii (dna directed) polypeptide d, 44kda, NCOA5 - nuclear receptor coactivator 5, MBNL2 - muscleblind-like splicing regulator 2, AARS - alanyl-trna synthetase, DHX30 - deah (asp-glu-ala-his) box helicase 30, CEBPZ - ccaat/enhancer binding protein (c/ebp), zeta, FBXO18 - …
GO:0044428	nuclear part	2.25e-14	1.01e-11	1.37	3743	1201	884	388	[VEZT - vezatin, adherens junctions transmembrane protein, EXOSC10 - exosome component 10, CDKN2AIP - cdkn2a interacting protein, CBX1 - chromobox homolog 1, ABCF1 - atp-binding cassette, sub-family f (gcn20), member 1, GCH1 - gtp cyclohydrolase 1, ACADVL - acyl-coa dehydrogenase, very long chain, FTSJ3 - ftsj homolog 3 (e. coli), PLRG1 - pleiotropic regulator 1, LYAR - ly1 antibody reactive, TCE…
GO:0044260	cellular macromolecule metabolic process	3.09e-14	1.07e-10	1.27	3743	1638	940	523	[AFG3L2 - afg3 atpase family member 3-like 2 (s. cerevisiae), SPTAN1 - spectrin, alpha, non-erythrocytic 1, EXOSC10 - exosome component 10, GGCX - gamma-glutamyl carboxylase, NCOA5 - nuclear receptor coactivator 5, AARS - alanyl-trna synthetase, CD2AP - cd2-associated protein, FBXO18 - f-box protein, helicase, 18, ZDHHC3 - zinc finger, dhhc-type containing 3, ABCF1 - atp-binding cassette, sub-fam…
GO:0010556	regulation of macromolecule biosynthetic process	5.41e-14	1.12e-10	1.4	3743	887	965	321	[TOB1 - transducer of erbb2, 1, NCBP1 - nuclear cap binding protein subunit 1, 80kda, EXOSC10 - exosome component 10, NCOA5 - nuclear receptor coactivator 5, AARS - alanyl-trna synthetase, CEBPZ - ccaat/enhancer binding protein (c/ebp), zeta, CBX1 - chromobox homolog 1, FBXO18 - f-box protein, helicase, 18, RELA - v-rel avian reticuloendotheliosis viral oncogene homolog a, WRNIP1 - werner helicas…
GO:0016070	RNA metabolic process	2.21e-14	1.15e-10	1.49	3743	754	937	281	[NCBP1 - nuclear cap binding protein subunit 1, 80kda, EXOSC10 - exosome component 10, TSN - translin, POLR3D - polymerase (rna) iii (dna directed) polypeptide d, 44kda, NCOA5 - nuclear receptor coactivator 5, MBNL2 - muscleblind-like splicing regulator 2, AARS - alanyl-trna synthetase, DHX30 - deah (asp-glu-ala-his) box helicase 30, CEBPZ - ccaat/enhancer binding protein (c/ebp), zeta, RELA - v-…
GO:2000112	regulation of cellular macromolecule biosynthetic process	5.16e-14	1.34e-10	1.41	3743	863	965	314	[TOB1 - transducer of erbb2, 1, NCBP1 - nuclear cap binding protein subunit 1, 80kda, EXOSC10 - exosome component 10, NCOA5 - nuclear receptor coactivator 5, AARS - alanyl-trna synthetase, CEBPZ - ccaat/enhancer binding protein (c/ebp), zeta, CBX1 - chromobox homolog 1, FBXO18 - f-box protein, helicase, 18, RELA - v-rel avian reticuloendotheliosis viral oncogene homolog a, WRNIP1 - werner helicas…
GO:0044451	nucleoplasm part	4.58e-12	1.54e-09	1.8	3743	315	805	122	[DHX9 - deah (asp-glu-ala-his) box helicase 9, DHX8 - deah (asp-glu-ala-his) box polypeptide 8, PNISR - pnn-interacting serine/arginine-rich protein, POLR3D - polymerase (rna) iii (dna directed) polypeptide d, 44kda, TCF12 - transcription factor 12, SIN3A - sin3 transcription regulator family member a, RPRD2 - regulation of nuclear pre-mrna domain containing 2, GTF2H3 - general transcription fact…
GO:0019219	regulation of nucleobase-containing compound metabolic process	9.66e-13	1.67e-09	1.38	3743	870	982	316	[TOB1 - transducer of erbb2, 1, NCBP1 - nuclear cap binding protein subunit 1, 80kda, EXOSC10 - exosome component 10, NCOA5 - nuclear receptor coactivator 5, MBNL2 - muscleblind-like splicing regulator 2, CEBPZ - ccaat/enhancer binding protein (c/ebp), zeta, CBX1 - chromobox homolog 1, FBXO18 - f-box protein, helicase, 18, RELA - v-rel avian reticuloendotheliosis viral oncogene homolog a, WRNIP1 …
GO:0005634	nucleus	1.66e-11	4.47e-09	1.32	3743	1089	967	370	[TOB1 - transducer of erbb2, 1, NCBP1 - nuclear cap binding protein subunit 1, 80kda, SLC39A11 - solute carrier family 39, member 11, TSN - translin, EXOSC10 - exosome component 10, NCOA5 - nuclear receptor coactivator 5, CEBPZ - ccaat/enhancer binding protein (c/ebp), zeta, CBX1 - chromobox homolog 1, FBXO18 - f-box protein, helicase, 18, RELA - v-rel avian reticuloendotheliosis viral oncogene h…
GO:0043170	macromolecule metabolic process	3.18e-12	4.71e-09	1.22	3743	1788	951	553	[AFG3L2 - afg3 atpase family member 3-like 2 (s. cerevisiae), SPTAN1 - spectrin, alpha, non-erythrocytic 1, EXOSC10 - exosome component 10, GGCX - gamma-glutamyl carboxylase, NCOA5 - nuclear receptor coactivator 5, AARS - alanyl-trna synthetase, CD2AP - cd2-associated protein, FBXO18 - f-box protein, helicase, 18, ZDHHC3 - zinc finger, dhhc-type containing 3, ABCF1 - atp-binding cassette, sub-fam…
GO:0051252	regulation of RNA metabolic process	6.8e-12	8.8e-09	1.39	3743	796	982	291	[TOB1 - transducer of erbb2, 1, NCBP1 - nuclear cap binding protein subunit 1, 80kda, NCOA5 - nuclear receptor coactivator 5, MBNL2 - muscleblind-like splicing regulator 2, CEBPZ - ccaat/enhancer binding protein (c/ebp), zeta, CBX1 - chromobox homolog 1, RELA - v-rel avian reticuloendotheliosis viral oncogene homolog a, RNF14 - ring finger protein 14, ZFP36L1 - zfp36 ring finger protein-like 1, C…
GO:0031326	regulation of cellular biosynthetic process	1.64e-11	1.89e-08	1.35	3743	929	965	324	[TOB1 - transducer of erbb2, 1, NCBP1 - nuclear cap binding protein subunit 1, 80kda, EXOSC10 - exosome component 10, NCOA5 - nuclear receptor coactivator 5, AARS - alanyl-trna synthetase, CEBPZ - ccaat/enhancer binding protein (c/ebp), zeta, CBX1 - chromobox homolog 1, FBXO18 - f-box protein, helicase, 18, RELA - v-rel avian reticuloendotheliosis viral oncogene homolog a, WRNIP1 - werner helicas…
GO:0003677	DNA binding	4.91e-11	4.66e-08	1.56	3743	412	989	170	[MLX - mlx, max dimerization protein, DHX9 - deah (asp-glu-ala-his) box helicase 9, DHX36 - deah (asp-glu-ala-his) box polypeptide 36, DHX58 - dexh (asp-glu-x-his) box polypeptide 58, TSN - translin, POLR3D - polymerase (rna) iii (dna directed) polypeptide d, 44kda, SETDB1 - set domain, bifurcated 1, ORC4 - origin recognition complex, subunit 4, TCF12 - transcription factor 12, SIN3A - sin3 trans…
GO:0010468	regulation of gene expression	5.62e-11	5.82e-08	1.34	3743	974	938	327	[TOB1 - transducer of erbb2, 1, NCBP1 - nuclear cap binding protein subunit 1, 80kda, EXOSC10 - exosome component 10, NCOA5 - nuclear receptor coactivator 5, MBNL2 - muscleblind-like splicing regulator 2, AARS - alanyl-trna synthetase, CEBPZ - ccaat/enhancer binding protein (c/ebp), zeta, CBX1 - chromobox homolog 1, RELA - v-rel avian reticuloendotheliosis viral oncogene homolog a, ERP29 - endopl…
GO:0009889	regulation of biosynthetic process	1.37e-10	1.29e-07	1.33	3743	956	965	328	[TOB1 - transducer of erbb2, 1, NCBP1 - nuclear cap binding protein subunit 1, 80kda, EXOSC10 - exosome component 10, NCOA5 - nuclear receptor coactivator 5, AARS - alanyl-trna synthetase, CEBPZ - ccaat/enhancer binding protein (c/ebp), zeta, CBX1 - chromobox homolog 1, FBXO18 - f-box protein, helicase, 18, RELA - v-rel avian reticuloendotheliosis viral oncogene homolog a, WRNIP1 - werner helicas…
GO:2001141	regulation of RNA biosynthetic process	2.46e-10	1.96e-07	1.39	3743	732	982	266	[TOB1 - transducer of erbb2, 1, NCOA5 - nuclear receptor coactivator 5, CBX1 - chromobox homolog 1, CEBPZ - ccaat/enhancer binding protein (c/ebp), zeta, RELA - v-rel avian reticuloendotheliosis viral oncogene homolog a, RNF14 - ring finger protein 14, CNOT11 - ccr4-not transcription complex, subunit 11, ZFP36L1 - zfp36 ring finger protein-like 1, MTDH - metadherin, ZNF410 - zinc finger protein 4…
GO:0006139	nucleobase-containing compound metabolic process	2.3e-10	1.98e-07	1.32	3743	999	964	339	[NCBP1 - nuclear cap binding protein subunit 1, 80kda, TSN - translin, EXOSC10 - exosome component 10, POLR3D - polymerase (rna) iii (dna directed) polypeptide d, 44kda, NCOA5 - nuclear receptor coactivator 5, MBNL2 - muscleblind-like splicing regulator 2, AARS - alanyl-trna synthetase, DHX30 - deah (asp-glu-ala-his) box helicase 30, CEBPZ - ccaat/enhancer binding protein (c/ebp), zeta, FBXO18 - …
GO:1903506	regulation of nucleic acid-templated transcription	4.8e-10	2.92e-07	1.38	3743	729	982	264	[TOB1 - transducer of erbb2, 1, NCOA5 - nuclear receptor coactivator 5, CBX1 - chromobox homolog 1, CEBPZ - ccaat/enhancer binding protein (c/ebp), zeta, RELA - v-rel avian reticuloendotheliosis viral oncogene homolog a, RNF14 - ring finger protein 14, CNOT11 - ccr4-not transcription complex, subunit 11, ZFP36L1 - zfp36 ring finger protein-like 1, MTDH - metadherin, ZNF410 - zinc finger protein 4…
GO:0051171	regulation of nitrogen compound metabolic process	4.73e-10	3.06e-07	1.33	3743	1310	661	307	[TOB1 - transducer of erbb2, 1, MARK2 - map/microtubule affinity-regulating kinase 2, EXOSC10 - exosome component 10, NCOA5 - nuclear receptor coactivator 5, MBNL2 - muscleblind-like splicing regulator 2, AARS - alanyl-trna synthetase, CEBPZ - ccaat/enhancer binding protein (c/ebp), zeta, FBXO18 - f-box protein, helicase, 18, OS9 - osteosarcoma amplified 9, endoplasmic reticulum lectin, ENSA - en…
GO:0060255	regulation of macromolecule metabolic process	4.69e-10	3.24e-07	1.3	3743	1352	716	337	[TOB1 - transducer of erbb2, 1, MARK2 - map/microtubule affinity-regulating kinase 2, EXOSC10 - exosome component 10, NCOA5 - nuclear receptor coactivator 5, MBNL2 - muscleblind-like splicing regulator 2, AARS - alanyl-trna synthetase, CEBPZ - ccaat/enhancer binding protein (c/ebp), zeta, FBXO18 - f-box protein, helicase, 18, OS9 - osteosarcoma amplified 9, endoplasmic reticulum lectin, ENSA - en…
GO:0006355	regulation of transcription, DNA-templated	4.64e-10	3.43e-07	1.38	3743	722	982	262	[TOB1 - transducer of erbb2, 1, NCOA5 - nuclear receptor coactivator 5, CBX1 - chromobox homolog 1, CEBPZ - ccaat/enhancer binding protein (c/ebp), zeta, RELA - v-rel avian reticuloendotheliosis viral oncogene homolog a, RNF14 - ring finger protein 14, CNOT11 - ccr4-not transcription complex, subunit 11, ZFP36L1 - zfp36 ring finger protein-like 1, MTDH - metadherin, ZNF410 - zinc finger protein 4…
GO:0032774	RNA biosynthetic process	7.91e-10	4.55e-07	1.46	3743	528	988	203	[NCBP1 - nuclear cap binding protein subunit 1, 80kda, POLR3D - polymerase (rna) iii (dna directed) polypeptide d, 44kda, NCOA5 - nuclear receptor coactivator 5, CEBPZ - ccaat/enhancer binding protein (c/ebp), zeta, RELA - v-rel avian reticuloendotheliosis viral oncogene homolog a, RNF14 - ring finger protein 14, CNOT11 - ccr4-not transcription complex, subunit 11, ZNF410 - zinc finger protein 41…
GO:0043234	protein complex	3.78e-09	8.48e-07	1.34	3743	834	952	284	[TOB1 - transducer of erbb2, 1, AFG3L2 - afg3 atpase family member 3-like 2 (s. cerevisiae), MAPKAP1 - mitogen-activated protein kinase associated protein 1, CD2AP - cd2-associated protein, RELA - v-rel avian reticuloendotheliosis viral oncogene homolog a, RABGAP1 - rab gtpase activating protein 1, SPG7 - spastic paraplegia 7 (pure and complicated autosomal recessive), COX15 - cytochrome c oxidas…
GO:1902494	catalytic complex	4.54e-08	6.78e-06	1.53	3743	424	825	143	[AFG3L2 - afg3 atpase family member 3-like 2 (s. cerevisiae), DHX8 - deah (asp-glu-ala-his) box polypeptide 8, EXOSC10 - exosome component 10, MCCC1 - methylcrotonoyl-coa carboxylase 1 (alpha), POLR3D - polymerase (rna) iii (dna directed) polypeptide d, 44kda, KBTBD2 - kelch repeat and btb (poz) domain containing 2, PPP2R2D - protein phosphatase 2, regulatory subunit b, delta, SIN3A - sin3 transc…
GO:0044427	chromosomal part	4.06e-08	6.82e-06	1.71	3743	199	989	90	[DHX9 - deah (asp-glu-ala-his) box helicase 9, DHX36 - deah (asp-glu-ala-his) box polypeptide 36, EXOSC10 - exosome component 10, POLR3D - polymerase (rna) iii (dna directed) polypeptide d, 44kda, TCP1 - t-complex 1, ORC4 - origin recognition complex, subunit 4, USF1 - upstream transcription factor 1, TCF12 - transcription factor 12, XPO1 - exportin 1 (crm1 homolog, yeast), CBX1 - chromobox homol…
GO:0044446	intracellular organelle part	3.87e-08	7.44e-06	1.13	3743	2394	852	618	[AFG3L2 - afg3 atpase family member 3-like 2 (s. cerevisiae), VEZT - vezatin, adherens junctions transmembrane protein, SPTAN1 - spectrin, alpha, non-erythrocytic 1, EXOSC10 - exosome component 10, GGCX - gamma-glutamyl carboxylase, CDKN2AIP - cdkn2a interacting protein, CD2AP - cd2-associated protein, CBX1 - chromobox homolog 1, FBXO18 - f-box protein, helicase, 18, PDIA5 - protein disulfide iso…
GO:0080090	regulation of primary metabolic process	2.29e-08	1.25e-05	1.29	3743	1369	661	311	[TOB1 - transducer of erbb2, 1, MARK2 - map/microtubule affinity-regulating kinase 2, EXOSC10 - exosome component 10, NCOA5 - nuclear receptor coactivator 5, MBNL2 - muscleblind-like splicing regulator 2, AARS - alanyl-trna synthetase, CEBPZ - ccaat/enhancer binding protein (c/ebp), zeta, FBXO18 - f-box protein, helicase, 18, OS9 - osteosarcoma amplified 9, endoplasmic reticulum lectin, ENSA - en…
GO:0031323	regulation of cellular metabolic process	2.5e-08	1.29e-05	1.27	3743	1394	716	338	[TOB1 - transducer of erbb2, 1, MARK2 - map/microtubule affinity-regulating kinase 2, EXOSC10 - exosome component 10, NCOA5 - nuclear receptor coactivator 5, MBNL2 - muscleblind-like splicing regulator 2, AARS - alanyl-trna synthetase, CEBPZ - ccaat/enhancer binding protein (c/ebp), zeta, FBXO18 - f-box protein, helicase, 18, OS9 - osteosarcoma amplified 9, endoplasmic reticulum lectin, ENSA - en…
GO:0006996	organelle organization	4.14e-08	2.04e-05	1.46	3743	542	811	172	[DHX9 - deah (asp-glu-ala-his) box helicase 9, AFG3L2 - afg3 atpase family member 3-like 2 (s. cerevisiae), SPTAN1 - spectrin, alpha, non-erythrocytic 1, MARK2 - map/microtubule affinity-regulating kinase 2, F11R - f11 receptor, SCFD1 - sec1 family domain containing 1, INPP5K - inositol polyphosphate-5-phosphatase k, CD2AP - cd2-associated protein, FBXO18 - f-box protein, helicase, 18, PDS5A - pd…
GO:0046483	heterocycle metabolic process	4.5e-08	2.12e-05	1.27	3743	1057	964	345	[NCBP1 - nuclear cap binding protein subunit 1, 80kda, TSN - translin, EXOSC10 - exosome component 10, MCCC1 - methylcrotonoyl-coa carboxylase 1 (alpha), POLR3D - polymerase (rna) iii (dna directed) polypeptide d, 44kda, NCOA5 - nuclear receptor coactivator 5, MBNL2 - muscleblind-like splicing regulator 2, AARS - alanyl-trna synthetase, DHX30 - deah (asp-glu-ala-his) box helicase 30, CEBPZ - ccaa…
GO:1901363	heterocyclic compound binding	3.55e-08	2.53e-05	1.21	3743	1398	998	452	[AFG3L2 - afg3 atpase family member 3-like 2 (s. cerevisiae), EXOSC9 - exosome component 9, EXOSC10 - exosome component 10, NCOA5 - nuclear receptor coactivator 5, CDKN2AIP - cdkn2a interacting protein, AARS - alanyl-trna synthetase, FBXO18 - f-box protein, helicase, 18, ABCF1 - atp-binding cassette, sub-family f (gcn20), member 1, ABCB7 - atp-binding cassette, sub-family b (mdr/tap), member 7, S…
GO:0044422	organelle part	2.31e-07	3.11e-05	1.13	3743	2416	852	619	[AFG3L2 - afg3 atpase family member 3-like 2 (s. cerevisiae), VEZT - vezatin, adherens junctions transmembrane protein, SPTAN1 - spectrin, alpha, non-erythrocytic 1, EXOSC10 - exosome component 10, GGCX - gamma-glutamyl carboxylase, CDKN2AIP - cdkn2a interacting protein, CD2AP - cd2-associated protein, CBX1 - chromobox homolog 1, FBXO18 - f-box protein, helicase, 18, PDIA5 - protein disulfide iso…
GO:0006725	cellular aromatic compound metabolic process	9.2e-08	4.14e-05	1.26	3743	1059	964	344	[NCBP1 - nuclear cap binding protein subunit 1, 80kda, TSN - translin, EXOSC10 - exosome component 10, POLR3D - polymerase (rna) iii (dna directed) polypeptide d, 44kda, NCOA5 - nuclear receptor coactivator 5, MBNL2 - muscleblind-like splicing regulator 2, AARS - alanyl-trna synthetase, DHX30 - deah (asp-glu-ala-his) box helicase 30, CEBPZ - ccaat/enhancer binding protein (c/ebp), zeta, FBXO18 - …
GO:0016569	covalent chromatin modification	1.03e-07	4.27e-05	2.57	3743	149	401	41	[EHMT1 - euchromatic histone-lysine n-methyltransferase 1, RYBP - ring1 and yy1 binding protein, ZMYND11 - zinc finger, mynd-type containing 11, HMG20A - high mobility group 20a, CTR9 - ctr9, paf1/rna polymerase ii complex component, EPC1 - enhancer of polycomb homolog 1 (drosophila), ARID1B - at rich interactive domain 1b (swi1-like), UBN1 - ubinuclein 1, MTA1 - metastasis associated 1, KDM1A - …
GO:0071840	cellular component organization or biogenesis	1.03e-07	4.44e-05	1.25	3743	1254	836	351	[AFG3L2 - afg3 atpase family member 3-like 2 (s. cerevisiae), EMD - emerin, MARK2 - map/microtubule affinity-regulating kinase 2, NCBP1 - nuclear cap binding protein subunit 1, 80kda, SPTAN1 - spectrin, alpha, non-erythrocytic 1, MCCC1 - methylcrotonoyl-coa carboxylase 1 (alpha), AAMP - angio-associated, migratory cell protein, DHX30 - deah (asp-glu-ala-his) box helicase 30, CD2AP - cd2-associate…
GO:0016043	cellular component organization	1.23e-07	4.7e-05	1.25	3743	1243	836	348	[AFG3L2 - afg3 atpase family member 3-like 2 (s. cerevisiae), EMD - emerin, NCBP1 - nuclear cap binding protein subunit 1, 80kda, MARK2 - map/microtubule affinity-regulating kinase 2, SPTAN1 - spectrin, alpha, non-erythrocytic 1, MCCC1 - methylcrotonoyl-coa carboxylase 1 (alpha), DHX30 - deah (asp-glu-ala-his) box helicase 30, CD2AP - cd2-associated protein, FBXO18 - f-box protein, helicase, 18, …
GO:0006396	RNA processing	1.21e-07	4.83e-05	1.59	3743	260	994	110	[DHX9 - deah (asp-glu-ala-his) box helicase 9, DHX36 - deah (asp-glu-ala-his) box polypeptide 36, DHX8 - deah (asp-glu-ala-his) box polypeptide 8, EXOSC9 - exosome component 9, NCBP1 - nuclear cap binding protein subunit 1, 80kda, EXOSC10 - exosome component 10, TSN - translin, TBL3 - transducin (beta)-like 3, MBNL2 - muscleblind-like splicing regulator 2, AARS - alanyl-trna synthetase, DHX30 - d…
GO:0019222	regulation of metabolic process	1.61e-07	5.95e-05	1.22	3743	1503	815	399	[EXOSC10 - exosome component 10, NCOA5 - nuclear receptor coactivator 5, AARS - alanyl-trna synthetase, CBX1 - chromobox homolog 1, FBXO18 - f-box protein, helicase, 18, OS9 - osteosarcoma amplified 9, endoplasmic reticulum lectin, ERP29 - endoplasmic reticulum protein 29, CNOT11 - ccr4-not transcription complex, subunit 11, GCH1 - gtp cyclohydrolase 1, MKKS - mckusick-kaufman syndrome, ACADVL - …
GO:0009059	macromolecule biosynthetic process	1.89e-07	6.75e-05	1.34	3743	677	988	239	[NCBP1 - nuclear cap binding protein subunit 1, 80kda, POLR3D - polymerase (rna) iii (dna directed) polypeptide d, 44kda, NCOA5 - nuclear receptor coactivator 5, CEBPZ - ccaat/enhancer binding protein (c/ebp), zeta, ABCF1 - atp-binding cassette, sub-family f (gcn20), member 1, RELA - v-rel avian reticuloendotheliosis viral oncogene homolog a, WRNIP1 - werner helicase interacting protein 1, RNF14 …
GO:0097159	organic cyclic compound binding	1.28e-07	7.29e-05	1.21	3743	1416	968	442	[AFG3L2 - afg3 atpase family member 3-like 2 (s. cerevisiae), EXOSC10 - exosome component 10, NCOA5 - nuclear receptor coactivator 5, CDKN2AIP - cdkn2a interacting protein, AARS - alanyl-trna synthetase, FBXO18 - f-box protein, helicase, 18, ABCF1 - atp-binding cassette, sub-family f (gcn20), member 1, ABCB7 - atp-binding cassette, sub-family b (mdr/tap), member 7, SPG7 - spastic paraplegia 7 (pu…
GO:0051649	establishment of localization in cell	3.76e-07	0.00013	1.42	3743	477	952	172	[TOB1 - transducer of erbb2, 1, AFG3L2 - afg3 atpase family member 3-like 2 (s. cerevisiae), SEL1L - sel-1 suppressor of lin-12-like (c. elegans), NCBP1 - nuclear cap binding protein subunit 1, 80kda, SPTAN1 - spectrin, alpha, non-erythrocytic 1, TOMM70A - translocase of outer mitochondrial membrane 70 homolog a (s. cerevisiae), TBC1D15 - tbc1 domain family, member 15, ERGIC1 - endoplasmic reticu…
GO:0097659	nucleic acid-templated transcription	4.97e-07	0.000161	1.42	3743	463	964	169	[MLX - mlx, max dimerization protein, DHX36 - deah (asp-glu-ala-his) box polypeptide 36, NCBP1 - nuclear cap binding protein subunit 1, 80kda, POLR3D - polymerase (rna) iii (dna directed) polypeptide d, 44kda, NCOA5 - nuclear receptor coactivator 5, SETDB1 - set domain, bifurcated 1, TCF12 - transcription factor 12, SIN3A - sin3 transcription regulator family member a, CEBPZ - ccaat/enhancer bind…
GO:0006351	transcription, DNA-templated	4.97e-07	0.000166	1.42	3743	463	964	169	[MLX - mlx, max dimerization protein, DHX36 - deah (asp-glu-ala-his) box polypeptide 36, NCBP1 - nuclear cap binding protein subunit 1, 80kda, POLR3D - polymerase (rna) iii (dna directed) polypeptide d, 44kda, NCOA5 - nuclear receptor coactivator 5, SETDB1 - set domain, bifurcated 1, TCF12 - transcription factor 12, SIN3A - sin3 transcription regulator family member a, CEBPZ - ccaat/enhancer bind…
GO:0043229	intracellular organelle	1.35e-06	0.000166	1.11	3743	2314	997	686	[AFG3L2 - afg3 atpase family member 3-like 2 (s. cerevisiae), VEZT - vezatin, adherens junctions transmembrane protein, EXOSC9 - exosome component 9, SPTAN1 - spectrin, alpha, non-erythrocytic 1, EXOSC10 - exosome component 10, AAMP - angio-associated, migratory cell protein, NCOA5 - nuclear receptor coactivator 5, CDKN2AIP - cdkn2a interacting protein, CD2AP - cd2-associated protein, CBX1 - chro…

## Sheet: liver, high to low
GO Term	Description	P-value	FDR q-value	Enrichment	N	B	n	b	Genes
GO:0044281	small molecule metabolic process	4.03e-19	4.07e-15	1.63	3368	508	989	243	[ELOVL2 - elovl fatty acid elongase 2, BCKDK - branched chain ketoacid dehydrogenase kinase, SUCLG1 - succinate-coa ligase, alpha subunit, ABAT - 4-aminobutyrate aminotransferase, AMACR - alpha-methylacyl-coa racemase, BDH2 - 3-hydroxybutyrate dehydrogenase, type 2, AASS - aminoadipate-semialdehyde synthase, LDLR - low density lipoprotein receptor, NUDT19 - nudix (nucleoside diphosphate linked mo…
GO:0006082	organic acid metabolic process	1.24e-17	6.26e-14	1.8	3368	310	995	165	[ELOVL2 - elovl fatty acid elongase 2, ANGPTL3 - angiopoietin-like 3, PNKD - paroxysmal nonkinesigenic dyskinesia, BCKDK - branched chain ketoacid dehydrogenase kinase, SUCLG1 - succinate-coa ligase, alpha subunit, CYP2U1 - cytochrome p450, family 2, subfamily u, polypeptide 1, ABAT - 4-aminobutyrate aminotransferase, AMACR - alpha-methylacyl-coa racemase, FMO1 - flavin containing monooxygenase 1…
GO:0043436	oxoacid metabolic process	9.22e-17	3.11e-13	1.79	3368	307	995	162	[ELOVL2 - elovl fatty acid elongase 2, ANGPTL3 - angiopoietin-like 3, PNKD - paroxysmal nonkinesigenic dyskinesia, SUCLG1 - succinate-coa ligase, alpha subunit, BCKDK - branched chain ketoacid dehydrogenase kinase, CYP2U1 - cytochrome p450, family 2, subfamily u, polypeptide 1, ABAT - 4-aminobutyrate aminotransferase, AMACR - alpha-methylacyl-coa racemase, BDH2 - 3-hydroxybutyrate dehydrogenase, …
GO:0019752	carboxylic acid metabolic process	6.9e-16	1.74e-12	1.81	3368	279	995	149	[ELOVL2 - elovl fatty acid elongase 2, ANGPTL3 - angiopoietin-like 3, PNKD - paroxysmal nonkinesigenic dyskinesia, BCKDK - branched chain ketoacid dehydrogenase kinase, SUCLG1 - succinate-coa ligase, alpha subunit, CYP2U1 - cytochrome p450, family 2, subfamily u, polypeptide 1, ABAT - 4-aminobutyrate aminotransferase, AMACR - alpha-methylacyl-coa racemase, AASS - aminoadipate-semialdehyde synthas…
GO:0032787	monocarboxylic acid metabolic process	1.23e-13	2.5e-10	2.14	3368	148	884	83	[ELOVL2 - elovl fatty acid elongase 2, PRKAB1 - protein kinase, amp-activated, beta 1 non-catalytic subunit, ANGPTL3 - angiopoietin-like 3, PNKD - paroxysmal nonkinesigenic dyskinesia, CROT - carnitine o-octanoyltransferase, CYP2U1 - cytochrome p450, family 2, subfamily u, polypeptide 1, ABAT - 4-aminobutyrate aminotransferase, AMACR - alpha-methylacyl-coa racemase, ABCB11 - atp-binding cassette,…
GO:0044282	small molecule catabolic process	2.18e-13	3.67e-10	2.05	3368	141	989	85	[CROT - carnitine o-octanoyltransferase, PNKD - paroxysmal nonkinesigenic dyskinesia, BCKDK - branched chain ketoacid dehydrogenase kinase, ENTPD8 - ectonucleoside triphosphate diphosphohydrolase 8, ABAT - 4-aminobutyrate aminotransferase, GOT1 - glutamic-oxaloacetic transaminase 1, soluble, AMACR - alpha-methylacyl-coa racemase, UROC1 - urocanate hydratase 1, AASS - aminoadipate-semialdehyde syn…
GO:0006629	lipid metabolic process	1.6e-12	2.31e-09	1.65	3368	347	905	154	[ELOVL2 - elovl fatty acid elongase 2, LGMN - legumain, ANGPTL3 - angiopoietin-like 3, LMF1 - lipase maturation factor 1, CYP2U1 - cytochrome p450, family 2, subfamily u, polypeptide 1, PGAP2 - post-gpi attachment to proteins 2, AMACR - alpha-methylacyl-coa racemase, ABCA2 - atp-binding cassette, sub-family a (abc1), member 2, SDC4 - syndecan 4, APOA4 - apolipoprotein a-iv, BDH2 - 3-hydroxybutyra…
GO:0046395	carboxylic acid catabolic process	3.46e-12	3.88e-09	2.25	3368	112	884	66	[CROT - carnitine o-octanoyltransferase, ABAT - 4-aminobutyrate aminotransferase, AMACR - alpha-methylacyl-coa racemase, GOT1 - glutamic-oxaloacetic transaminase 1, soluble, UROC1 - urocanate hydratase 1, AASS - aminoadipate-semialdehyde synthase, BDH2 - 3-hydroxybutyrate dehydrogenase, type 2, OTC - ornithine carbamoyltransferase, NUDT19 - nudix (nucleoside diphosphate linked moiety x)-type moti…
GO:0016054	organic acid catabolic process	3.46e-12	4.37e-09	2.25	3368	112	884	66	[CROT - carnitine o-octanoyltransferase, ABAT - 4-aminobutyrate aminotransferase, AMACR - alpha-methylacyl-coa racemase, GOT1 - glutamic-oxaloacetic transaminase 1, soluble, UROC1 - urocanate hydratase 1, BDH2 - 3-hydroxybutyrate dehydrogenase, type 2, AASS - aminoadipate-semialdehyde synthase, OTC - ornithine carbamoyltransferase, NUDT19 - nudix (nucleoside diphosphate linked moiety x)-type moti…
GO:0044283	small molecule biosynthetic process	3.57e-11	3.61e-08	2.04	3368	144	884	77	[ELOVL2 - elovl fatty acid elongase 2, PRKAB1 - protein kinase, amp-activated, beta 1 non-catalytic subunit, PYCRL - pyrroline-5-carboxylate reductase-like, ABAT - 4-aminobutyrate aminotransferase, AMACR - alpha-methylacyl-coa racemase, GOT1 - glutamic-oxaloacetic transaminase 1, soluble, PPIP5K2 - diphosphoinositol pentakisphosphate kinase 2, PNPO - pyridoxamine 5'-phosphate oxidase, ABCB11 - at…
GO:0031224	intrinsic component of membrane	6.28e-11	8.24e-08	1.35	3368	775	983	305	[NIPA2 - non imprinted in prader-willi/angelman syndrome 2, EMP2 - epithelial membrane protein 2, DST - dystonin, ELOVL2 - elovl fatty acid elongase 2, BET1 - bet1 golgi vesicular membrane trafficking protein, SLC16A13 - solute carrier family 16, member 13, PAQR9 - progestin and adipoq receptor family member ix, WLS - wntless homolog (drosophila), ABCA2 - atp-binding cassette, sub-family a (abc1)…
GO:0044255	cellular lipid metabolic process	9.27e-11	8.52e-08	1.69	3368	274	903	124	[ELOVL2 - elovl fatty acid elongase 2, ANGPTL3 - angiopoietin-like 3, LMF1 - lipase maturation factor 1, CYP2U1 - cytochrome p450, family 2, subfamily u, polypeptide 1, PGAP2 - post-gpi attachment to proteins 2, AMACR - alpha-methylacyl-coa racemase, SDC4 - syndecan 4, APOA4 - apolipoprotein a-iv, BDH2 - 3-hydroxybutyrate dehydrogenase, type 2, NAGA - n-acetylgalactosaminidase, alpha-, CD74 - cd7…
GO:0005615	extracellular space	5.82e-10	2.54e-07	2.26	3368	207	454	63	[XDH - xanthine dehydrogenase, TIMP2 - timp metallopeptidase inhibitor 2, AEBP1 - ae binding protein 1, TCN2 - transcobalamin ii, LGALS8 - lectin, galactoside-binding, soluble, 8, HTRA1 - htra serine peptidase 1, APOA4 - apolipoprotein a-iv, CTGF - connective tissue growth factor, SERPINA11 - serpin peptidase inhibitor, clade a (alpha-1 antiproteinase, antitrypsin), member 11, DCN - decorin, SPAR…
GO:0016021	integral component of membrane	4.82e-10	3.16e-07	1.34	3368	767	983	299	[NIPA2 - non imprinted in prader-willi/angelman syndrome 2, DST - dystonin, EMP2 - epithelial membrane protein 2, ELOVL2 - elovl fatty acid elongase 2, BET1 - bet1 golgi vesicular membrane trafficking protein, SLC16A13 - solute carrier family 16, member 13, PAQR9 - progestin and adipoq receptor family member ix, WLS - wntless homolog (drosophila), FAM73B - family with sequence similarity 73, memb…
GO:0009063	cellular amino acid catabolic process	5.68e-10	4.78e-07	2.45	3368	57	989	41	[AGXT2 - alanine--glyoxylate aminotransferase 2, BCKDK - branched chain ketoacid dehydrogenase kinase, ABAT - 4-aminobutyrate aminotransferase, GOT1 - glutamic-oxaloacetic transaminase 1, soluble, UROC1 - urocanate hydratase 1, CDO1 - cysteine dioxygenase type 1, AASS - aminoadipate-semialdehyde synthase, AMDHD1 - amidohydrolase domain containing 1, OTC - ornithine carbamoyltransferase, TAT - tyr…
GO:0046394	carboxylic acid biosynthetic process	6.86e-10	4.96e-07	2.3	3368	86	868	51	[ELOVL2 - elovl fatty acid elongase 2, PRKAB1 - protein kinase, amp-activated, beta 1 non-catalytic subunit, PYCRL - pyrroline-5-carboxylate reductase-like, ABAT - 4-aminobutyrate aminotransferase, AMACR - alpha-methylacyl-coa racemase, GOT1 - glutamic-oxaloacetic transaminase 1, soluble, ABCB11 - atp-binding cassette, sub-family b (mdr/tap), member 11, AASS - aminoadipate-semialdehyde synthase, …
GO:0016053	organic acid biosynthetic process	6.86e-10	5.34e-07	2.3	3368	86	868	51	[ELOVL2 - elovl fatty acid elongase 2, PRKAB1 - protein kinase, amp-activated, beta 1 non-catalytic subunit, PYCRL - pyrroline-5-carboxylate reductase-like, ABAT - 4-aminobutyrate aminotransferase, AMACR - alpha-methylacyl-coa racemase, GOT1 - glutamic-oxaloacetic transaminase 1, soluble, ABCB11 - atp-binding cassette, sub-family b (mdr/tap), member 11, AASS - aminoadipate-semialdehyde synthase, …
GO:0006820	anion transport	1.21e-09	8.16e-07	2.02	3368	112	968	65	[SLC6A12 - solute carrier family 6 (neurotransmitter transporter), member 12, CROT - carnitine o-octanoyltransferase, SLC16A13 - solute carrier family 16, member 13, FABP1 - fatty acid binding protein 1, liver, SFXN5 - sideroflexin 5, SLC7A2 - solute carrier family 7 (cationic amino acid transporter, y+ system), member 2, ABCB11 - atp-binding cassette, sub-family b (mdr/tap), member 11, APOA4 - a…
GO:0006631	fatty acid metabolic process	1.3e-09	8.19e-07	2.18	3368	98	884	56	[ELOVL2 - elovl fatty acid elongase 2, PRKAB1 - protein kinase, amp-activated, beta 1 non-catalytic subunit, ANGPTL3 - angiopoietin-like 3, CROT - carnitine o-octanoyltransferase, CYP2U1 - cytochrome p450, family 2, subfamily u, polypeptide 1, AMACR - alpha-methylacyl-coa racemase, BDH2 - 3-hydroxybutyrate dehydrogenase, type 2, CD74 - cd74 molecule, major histocompatibility complex, class ii inv…
GO:0005576	extracellular region	1.8e-08	5.92e-06	2.78	3368	264	179	39	[IGJ - immunoglobulin j polypeptide, linker protein for immunoglobulin alpha and mu polypeptides, PLAC8 - placenta-specific 8, SCN1B - sodium channel, voltage-gated, type i, beta subunit, HTRA1 - htra serine peptidase 1, SPP2 - secreted phosphoprotein 2, 24kda, PLA2G7 - phospholipase a2, group vii (platelet-activating factor acetylhydrolase, plasma), APOOL - apolipoprotein o-like, APOA4 - apolipo…
GO:1901606	alpha-amino acid catabolic process	1.53e-08	9.11e-06	2.5	3368	51	923	35	[AGXT2 - alanine--glyoxylate aminotransferase 2, GOT1 - glutamic-oxaloacetic transaminase 1, soluble, UROC1 - urocanate hydratase 1, CDO1 - cysteine dioxygenase type 1, AASS - aminoadipate-semialdehyde synthase, AMDHD1 - amidohydrolase domain containing 1, OTC - ornithine carbamoyltransferase, TAT - tyrosine aminotransferase, ALDH4A1 - aldehyde dehydrogenase 4 family, member a1, GLDC - glycine de…
GO:0031226	intrinsic component of plasma membrane	4.5e-08	1.18e-05	1.7	3368	182	991	91	[SLC6A12 - solute carrier family 6 (neurotransmitter transporter), member 12, SLC2A8 - solute carrier family 2 (facilitated glucose transporter), member 8, SLC16A13 - solute carrier family 16, member 13, SLC7A2 - solute carrier family 7 (cationic amino acid transporter, y+ system), member 2, MFSD3 - major facilitator superfamily domain containing 3, ABCB11 - atp-binding cassette, sub-family b (md…
GO:0015711	organic anion transport	5.5e-08	3.09e-05	2.05	3368	96	905	53	[SLC6A12 - solute carrier family 6 (neurotransmitter transporter), member 12, CROT - carnitine o-octanoyltransferase, SLC16A13 - solute carrier family 16, member 13, FABP1 - fatty acid binding protein 1, liver, SFXN5 - sideroflexin 5, SLC7A2 - solute carrier family 7 (cationic amino acid transporter, y+ system), member 2, ABCB11 - atp-binding cassette, sub-family b (mdr/tap), member 11, APOA4 - a…
GO:0072330	monocarboxylic acid biosynthetic process	6.34e-08	3.37e-05	2.49	3368	53	868	34	[ELOVL2 - elovl fatty acid elongase 2, PRKAB1 - protein kinase, amp-activated, beta 1 non-catalytic subunit, ABAT - 4-aminobutyrate aminotransferase, AMACR - alpha-methylacyl-coa racemase, ABCB11 - atp-binding cassette, sub-family b (mdr/tap), member 11, TECR - trans-2,3-enoyl-coa reductase, OSBPL1A - oxysterol binding protein-like 1a, CD74 - cd74 molecule, major histocompatibility complex, class…
GO:0005887	integral component of plasma membrane	4.91e-07	0.000107	1.66	3368	176	991	86	[SLC6A12 - solute carrier family 6 (neurotransmitter transporter), member 12, SLC2A8 - solute carrier family 2 (facilitated glucose transporter), member 8, SLC16A13 - solute carrier family 16, member 13, SLC7A2 - solute carrier family 7 (cationic amino acid transporter, y+ system), member 2, MFSD3 - major facilitator superfamily domain containing 3, PTPRM - protein tyrosine phosphatase, receptor …
GO:0006790	sulfur compound metabolic process	2.71e-07	0.000137	1.85	3368	114	989	62	[ELOVL2 - elovl fatty acid elongase 2, ACOT13 - acyl-coa thioesterase 13, AASS - aminoadipate-semialdehyde synthase, DCN - decorin, PRELP - proline/arginine-rich end leucine-rich repeat protein, ACSL4 - acyl-coa synthetase long-chain family member 4, GSTZ1 - glutathione s-transferase zeta 1, PCCA - propionyl coa carboxylase, alpha polypeptide, FASN - fatty acid synthase, OPLAH - 5-oxoprolinase (a…
GO:0016042	lipid catabolic process	2.95e-07	0.000142	2.08	3368	86	884	47	[ACOX3 - acyl-coa oxidase 3, pristanoyl, SGPL1 - sphingosine-1-phosphate lyase 1, ANGPTL3 - angiopoietin-like 3, CROT - carnitine o-octanoyltransferase, PLBD1 - phospholipase b domain containing 1, FABP1 - fatty acid binding protein 1, liver, LPIN1 - lipin 1, AMACR - alpha-methylacyl-coa racemase, PLA2G7 - phospholipase a2, group vii (platelet-activating factor acetylhydrolase, plasma), APOA4 - a…
GO:0006520	cellular amino acid metabolic process	3.51e-07	0.000161	1.83	3368	117	989	63	[BCKDK - branched chain ketoacid dehydrogenase kinase, PYCRL - pyrroline-5-carboxylate reductase-like, ABAT - 4-aminobutyrate aminotransferase, SLC7A2 - solute carrier family 7 (cationic amino acid transporter, y+ system), member 2, GOT1 - glutamic-oxaloacetic transaminase 1, soluble, UROC1 - urocanate hydratase 1, AASS - aminoadipate-semialdehyde synthase, OTC - ornithine carbamoyltransferase, A…
GO:0015849	organic acid transport	3.86e-07	0.00017	2.19	3368	68	903	40	[SLC6A12 - solute carrier family 6 (neurotransmitter transporter), member 12, SLC35D1 - solute carrier family 35 (udp-glca/udp-galnac transporter), member d1, CROT - carnitine o-octanoyltransferase, SLC5A6 - solute carrier family 5 (sodium/multivitamin and iodide cotransporter), member 6, SLC16A13 - solute carrier family 16, member 13, SLC2A9 - solute carrier family 2 (facilitated glucose transpo…
GO:0055114	oxidation-reduction process	4.65e-07	0.000196	1.72	3368	244	665	83	[XDH - xanthine dehydrogenase, CROT - carnitine o-octanoyltransferase, PYCRL - pyrroline-5-carboxylate reductase-like, CYP2U1 - cytochrome p450, family 2, subfamily u, polypeptide 1, NDUFA6 - nadh dehydrogenase (ubiquinone) 1 alpha subcomplex, 6, 14kda, PLA2G7 - phospholipase a2, group vii (platelet-activating factor acetylhydrolase, plasma), AMACR - alpha-methylacyl-coa racemase, FMO1 - flavin c…
GO:0015291	secondary active transmembrane transporter activity	8.1e-08	0.000222	2.52	3368	44	943	31	[SLC6A12 - solute carrier family 6 (neurotransmitter transporter), member 12, SLC2A8 - solute carrier family 2 (facilitated glucose transporter), member 8, SLC5A6 - solute carrier family 5 (sodium/multivitamin and iodide cotransporter), member 6, SLC16A13 - solute carrier family 16, member 13, SLC2A9 - solute carrier family 2 (facilitated glucose transporter), member 9, SLC22A18 - solute carrier …
GO:1901605	alpha-amino acid metabolic process	7.87e-07	0.000318	2.13	3368	88	792	44	[AGXT2 - alanine--glyoxylate aminotransferase 2, ERO1LB - ero1-like beta (s. cerevisiae), PYCRL - pyrroline-5-carboxylate reductase-like, GOT1 - glutamic-oxaloacetic transaminase 1, soluble, UROC1 - urocanate hydratase 1, ADSSL1 - adenylosuccinate synthase like 1, CDO1 - cysteine dioxygenase type 1, AASS - aminoadipate-semialdehyde synthase, TAT - tyrosine aminotransferase, OTC - ornithine carbam…
GO:0046942	carboxylic acid transport	8.31e-07	0.000323	2.17	3368	67	903	39	[SLC6A12 - solute carrier family 6 (neurotransmitter transporter), member 12, SLC35D1 - solute carrier family 35 (udp-glca/udp-galnac transporter), member d1, CROT - carnitine o-octanoyltransferase, SLC5A6 - solute carrier family 5 (sodium/multivitamin and iodide cotransporter), member 6, SLC16A13 - solute carrier family 16, member 13, ABCC2 - atp-binding cassette, sub-family c (cftr/mrp), member…
GO:0006811	ion transport	9.26e-07	0.000347	1.56	3368	228	968	102	[NIPA2 - non imprinted in prader-willi/angelman syndrome 2, TCN2 - transcobalamin ii, TMEM38B - transmembrane protein 38b, SLC16A13 - solute carrier family 16, member 13, SLC22A18 - solute carrier family 22, member 18, MFSD3 - major facilitator superfamily domain containing 3, APOA4 - apolipoprotein a-iv, LDLR - low density lipoprotein receptor, CA14 - carbonic anhydrase xiv, SLC43A1 - solute car…
GO:0097164	ammonium ion metabolic process	1.03e-06	0.000371	3.03	3368	56	497	25	[CROT - carnitine o-octanoyltransferase, PLBD1 - phospholipase b domain containing 1, LPIN1 - lipin 1, PLA2G7 - phospholipase a2, group vii (platelet-activating factor acetylhydrolase, plasma), SAT2 - spermidine/spermine n1-acetyltransferase family member 2, APOA4 - apolipoprotein a-iv, ENPP2 - ectonucleotide pyrophosphatase/phosphodiesterase 2, DHPS - deoxyhypusine synthase, GPLD1 - glycosylphos…
GO:0006633	fatty acid biosynthetic process	1.11e-06	0.000386	6.42	3368	31	203	12	[FADS1 - fatty acid desaturase 1, ELOVL2 - elovl fatty acid elongase 2, LIPC - lipase, hepatic, FADS6 - fatty acid desaturase 6, FAM213B - family with sequence similarity 213, member b, MGLL - monoglyceride lipase, ACLY - atp citrate lyase, FADS2 - fatty acid desaturase 2, DECR2 - 2,4-dienoyl coa reductase 2, peroxisomal, ACSM3 - acyl-coa synthetase medium-chain family member 3, FASN - fatty acid…
GO:0072593	reactive oxygen species metabolic process	2.69e-06	0.000908	6.62	3368	28	200	11	[CTGF - connective tissue growth factor, CYR61 - cysteine-rich, angiogenic inducer, 61, DDIT4 - dna-damage-inducible transcript 4, IMMP2L - imp2 inner mitochondrial membrane peptidase-like (s. cerevisiae), SOD3 - superoxide dismutase 3, extracellular, PDK4 - pyruvate dehydrogenase kinase, isozyme 4, CYP1A1 - cytochrome p450, family 1, subfamily a, polypeptide 1, NQO1 - nad(p)h dehydrogenase, quin…
GO:0043648	dicarboxylic acid metabolic process	3.69e-06	0.0012	2.53	3368	31	989	23	[ACLY - atp citrate lyase, PCK1 - phosphoenolpyruvate carboxykinase 1 (soluble), GLS2 - glutaminase 2 (liver, mitochondrial), GOT1 - glutamic-oxaloacetic transaminase 1, soluble, UROC1 - urocanate hydratase 1, ADSSL1 - adenylosuccinate synthase like 1, PRODH2 - proline dehydrogenase (oxidase) 2, AMDHD1 - amidohydrolase domain containing 1, KYNU - kynureninase, GHR - growth hormone receptor, TAT -…
GO:0044421	extracellular region part	7.17e-06	0.00134	1.28	3368	833	773	245	[DST - dystonin, LGALS8 - lectin, galactoside-binding, soluble, 8, ABAT - 4-aminobutyrate aminotransferase, WLS - wntless homolog (drosophila), SPP2 - secreted phosphoprotein 2, 24kda, IQGAP1 - iq motif containing gtpase activating protein 1, NAGA - n-acetylgalactosaminidase, alpha-, HRG - histidine-rich glycoprotein, SEMA4G - sema domain, immunoglobulin domain (ig), transmembrane domain (tm) and…
GO:0001676	long-chain fatty acid metabolic process	1e-05	0.00317	11.91	3368	22	90	7	[FADS1 - fatty acid desaturase 1, ELOVL2 - elovl fatty acid elongase 2, MGLL - monoglyceride lipase, FADS2 - fatty acid desaturase 2, ACSL4 - acyl-coa synthetase long-chain family member 4, CYP1A1 - cytochrome p450, family 1, subfamily a, polypeptide 1, ACADL - acyl-coa dehydrogenase, long chain]
GO:0008509	anion transmembrane transporter activity	2.38e-06	0.00326	2.19	3368	54	968	34	[SLC6A12 - solute carrier family 6 (neurotransmitter transporter), member 12, SLC16A13 - solute carrier family 16, member 13, ABCC2 - atp-binding cassette, sub-family c (cftr/mrp), member 2, SLC2A9 - solute carrier family 2 (facilitated glucose transporter), member 9, SFXN5 - sideroflexin 5, SLC7A2 - solute carrier family 7 (cationic amino acid transporter, y+ system), member 2, MFSD10 - major fa…
GO:0031012	extracellular matrix	2.51e-05	0.00329	2.76	3368	73	401	24	[LTBP4 - latent transforming growth factor beta binding protein 4, FGFR2 - fibroblast growth factor receptor 2, PCOLCE - procollagen c-endopeptidase enhancer, TIMP2 - timp metallopeptidase inhibitor 2, AEBP1 - ae binding protein 1, HTRA1 - htra serine peptidase 1, TGM2 - transglutaminase 2, COL1A1 - collagen, type i, alpha 1, CTGF - connective tissue growth factor, RPS11 - ribosomal protein s11, …
GO:0015293	symporter activity	3.7e-06	0.00339	2.57	3368	32	943	23	[SLC38A3 - solute carrier family 38, member 3, SLC23A1 - solute carrier family 23 (ascorbic acid transporter), member 1, SLC6A12 - solute carrier family 6 (neurotransmitter transporter), member 12, SLC16A12 - solute carrier family 16, member 12, SLC23A2 - solute carrier family 23 (ascorbic acid transporter), member 2, SLC2A8 - solute carrier family 2 (facilitated glucose transporter), member 8, S…
GO:0043202	lysosomal lumen	2.14e-05	0.0035	3.05	3368	32	622	18	[CTSK - cathepsin k, LGMN - legumain, TCN2 - transcobalamin ii, CTSF - cathepsin f, ARSA - arylsulfatase a, PLBD2 - phospholipase b domain containing 2, HYAL1 - hyaluronoglucosaminidase 1, IFI30 - interferon, gamma-inducible protein 30, TXNDC5 - thioredoxin domain containing 5 (endoplasmic reticulum), SDC4 - syndecan 4, GALNS - galactosamine (n-acetyl)-6-sulfate sulfatase, SDC2 - syndecan 2, CD74…
GO:0016491	oxidoreductase activity	5.16e-06	0.00354	1.79	3368	187	665	66	[XDH - xanthine dehydrogenase, CYP2U1 - cytochrome p450, family 2, subfamily u, polypeptide 1, PYCRL - pyrroline-5-carboxylate reductase-like, NDUFA6 - nadh dehydrogenase (ubiquinone) 1 alpha subcomplex, 6, 14kda, FMO1 - flavin containing monooxygenase 1, IFI30 - interferon, gamma-inducible protein 30, AASS - aminoadipate-semialdehyde synthase, ALDH4A1 - aldehyde dehydrogenase 4 family, member a1…
GO:0005886	plasma membrane	2.5e-05	0.00364	1.27	3368	654	954	235	[TRIB3 - tribbles homolog 3 (drosophila), NIPA2 - non imprinted in prader-willi/angelman syndrome 2, EMP2 - epithelial membrane protein 2, LRRC45 - leucine rich repeat containing 45, PAQR9 - progestin and adipoq receptor family member ix, SUCLG1 - succinate-coa ligase, alpha subunit, UBL3 - ubiquitin-like 3, WLS - wntless homolog (drosophila), AMACR - alpha-methylacyl-coa racemase, LDLR - low den…
GO:0033559	unsaturated fatty acid metabolic process	1.32e-05	0.00392	5.22	3368	21	338	11	[FADS1 - fatty acid desaturase 1, ELOVL2 - elovl fatty acid elongase 2, FAM213B - family with sequence similarity 213, member b, MGLL - monoglyceride lipase, FADS2 - fatty acid desaturase 2, SCP2 - sterol carrier protein 2, ELOVL5 - elovl fatty acid elongase 5, CYP1A1 - cytochrome p450, family 1, subfamily a, polypeptide 1, HPGD - hydroxyprostaglandin dehydrogenase 15-(nad), CYP2U1 - cytochrome p…
GO:0006636	unsaturated fatty acid biosynthetic process	1.29e-05	0.00395	6.16	3368	7	547	7	[FADS1 - fatty acid desaturase 1, ELOVL2 - elovl fatty acid elongase 2, CD74 - cd74 molecule, major histocompatibility complex, class ii invariant chain, FAM213B - family with sequence similarity 213, member b, ELOVL5 - elovl fatty acid elongase 5, FADS2 - fatty acid desaturase 2, DECR2 - 2,4-dienoyl coa reductase 2, peroxisomal]
GO:0031974	membrane-enclosed lumen	4.9e-05	0.00428	1.63	3368	379	408	75	[TIMP2 - timp metallopeptidase inhibitor 2, CROT - carnitine o-octanoyltransferase, PLAC8 - placenta-specific 8, TCN2 - transcobalamin ii, FABP1 - fatty acid binding protein 1, liver, SPP2 - secreted phosphoprotein 2, 24kda, AMACR - alpha-methylacyl-coa racemase, FMO1 - flavin containing monooxygenase 1, PRSS23 - protease, serine, 23, APOA4 - apolipoprotein a-iv, SDC4 - syndecan 4, AASS - aminoad…
GO:0044439	peroxisomal part	4.08e-05	0.00445	2.26	3368	43	900	26	[ACOX3 - acyl-coa oxidase 3, pristanoyl, CROT - carnitine o-octanoyltransferase, FABP1 - fatty acid binding protein 1, liver, AMACR - alpha-methylacyl-coa racemase, NUDT19 - nudix (nucleoside diphosphate linked moiety x)-type motif 19, PXMP2 - peroxisomal membrane protein 2, 22kda, SCP2 - sterol carrier protein 2, ACSL4 - acyl-coa synthetase long-chain family member 4, ABCD3 - atp-binding cassett…
GO:0070013	intracellular organelle lumen	4.9e-05	0.00459	1.63	3368	379	408	75	[TIMP2 - timp metallopeptidase inhibitor 2, CROT - carnitine o-octanoyltransferase, PLAC8 - placenta-specific 8, TCN2 - transcobalamin ii, FABP1 - fatty acid binding protein 1, liver, SPP2 - secreted phosphoprotein 2, 24kda, AMACR - alpha-methylacyl-coa racemase, FMO1 - flavin containing monooxygenase 1, PRSS23 - protease, serine, 23, APOA4 - apolipoprotein a-iv, SDC4 - syndecan 4, AASS - aminoad…
GO:0044438	microbody part	4.08e-05	0.00486	2.26	3368	43	900	26	[ACOX3 - acyl-coa oxidase 3, pristanoyl, CROT - carnitine o-octanoyltransferase, FABP1 - fatty acid binding protein 1, liver, AMACR - alpha-methylacyl-coa racemase, NUDT19 - nudix (nucleoside diphosphate linked moiety x)-type motif 19, PXMP2 - peroxisomal membrane protein 2, 22kda, SCP2 - sterol carrier protein 2, ACSL4 - acyl-coa synthetase long-chain family member 4, ABCD3 - atp-binding cassett…
GO:0043233	organelle lumen	4.9e-05	0.00494	1.63	3368	379	408	75	[TIMP2 - timp metallopeptidase inhibitor 2, CROT - carnitine o-octanoyltransferase, PLAC8 - placenta-specific 8, TCN2 - transcobalamin ii, FABP1 - fatty acid binding protein 1, liver, SPP2 - secreted phosphoprotein 2, 24kda, AMACR - alpha-methylacyl-coa racemase, FMO1 - flavin containing monooxygenase 1, PRSS23 - protease, serine, 23, SDC4 - syndecan 4, APOA4 - apolipoprotein a-iv, AASS - aminoad…
GO:0044242	cellular lipid catabolic process	2.04e-05	0.00572	2.05	3368	67	884	36	[SGPL1 - sphingosine-1-phosphate lyase 1, ACOX3 - acyl-coa oxidase 3, pristanoyl, ANGPTL3 - angiopoietin-like 3, CROT - carnitine o-octanoyltransferase, FABP1 - fatty acid binding protein 1, liver, LPIN1 - lipin 1, AMACR - alpha-methylacyl-coa racemase, BDH2 - 3-hydroxybutyrate dehydrogenase, type 2, NAGA - n-acetylgalactosaminidase, alpha-, ENPP2 - ectonucleotide pyrophosphatase/phosphodiesteras…
GO:0009605	response to external stimulus	1.99e-05	0.00576	1.61	3368	296	580	82	[PLAC8 - placenta-specific 8, LGALS8 - lectin, galactoside-binding, soluble, 8, HNRNPA0 - heterogeneous nuclear ribonucleoprotein a0, FMO1 - flavin containing monooxygenase 1, CXCL12 - chemokine (c-x-c motif) ligand 12, TICAM1 - toll-like receptor adaptor molecule 1, OTC - ornithine carbamoyltransferase, HRG - histidine-rich glycoprotein, PML - promyelocytic leukemia, DCN - decorin, ACSL4 - acyl-…
GO:0022857	transmembrane transporter activity	1.45e-05	0.00662	1.64	3368	153	968	72	[NIPA2 - non imprinted in prader-willi/angelman syndrome 2, SLC6A12 - solute carrier family 6 (neurotransmitter transporter), member 12, TOMM40 - translocase of outer mitochondrial membrane 40 homolog (yeast), SLC2A8 - solute carrier family 2 (facilitated glucose transporter), member 8, TMEM38B - transmembrane protein 38b, SLC16A13 - solute carrier family 16, member 13, SFXN5 - sideroflexin 5, SL…
GO:0022891	substrate-specific transmembrane transporter activity	1.81e-05	0.00708	1.68	3368	135	968	65	[NIPA2 - non imprinted in prader-willi/angelman syndrome 2, SLC6A12 - solute carrier family 6 (neurotransmitter transporter), member 12, TOMM40 - translocase of outer mitochondrial membrane 40 homolog (yeast), SLC2A8 - solute carrier family 2 (facilitated glucose transporter), member 8, TMEM38B - transmembrane protein 38b, SLC16A13 - solute carrier family 16, member 13, SFXN5 - sideroflexin 5, SL…
GO:0008514	organic anion transmembrane transporter activity	2.13e-05	0.00729	2.24	3368	42	968	27	[SLC6A12 - solute carrier family 6 (neurotransmitter transporter), member 12, SLC16A13 - solute carrier family 16, member 13, ABCC2 - atp-binding cassette, sub-family c (cftr/mrp), member 2, SLC2A9 - solute carrier family 2 (facilitated glucose transporter), member 9, SFXN5 - sideroflexin 5, SLC7A2 - solute carrier family 7 (cationic amino acid transporter, y+ system), member 2, MFSD10 - major fa…
GO:0008028	monocarboxylic acid transmembrane transporter activity	1.44e-05	0.00789	4.18	3368	11	733	10	[SLC38A3 - solute carrier family 38, member 3, SLC10A3 - solute carrier family 10, member 3, SLC6A12 - solute carrier family 6 (neurotransmitter transporter), member 12, SLC10A1 - solute carrier family 10 (sodium/bile acid cotransporter), member 1, SLC16A12 - solute carrier family 16, member 12, SLC16A7 - solute carrier family 16 (monocarboxylate transporter), member 7, SLC16A1 - solute carrier f…
GO:1901617	organic hydroxy compound biosynthetic process	2.89e-05	0.00791	2.21	3368	51	868	29	[LSS - lanosterol synthase (2,3-oxidosqualene-lanosterol cyclase), GOT1 - glutamic-oxaloacetic transaminase 1, soluble, AMACR - alpha-methylacyl-coa racemase, PPIP5K2 - diphosphoinositol pentakisphosphate kinase 2, ABCB11 - atp-binding cassette, sub-family b (mdr/tap), member 11, PNPO - pyridoxamine 5'-phosphate oxidase, APOA4 - apolipoprotein a-iv, DHCR24 - 24-dehydrocholesterol reductase, OSBPL…
GO:0005342	organic acid transmembrane transporter activity	3.33e-05	0.00831	2.39	3368	32	968	22	[SLC38A3 - solute carrier family 38, member 3, SLC23A1 - solute carrier family 23 (ascorbic acid transporter), member 1, SLC6A12 - solute carrier family 6 (neurotransmitter transporter), member 12, SLC16A12 - solute carrier family 16, member 12, SLC23A2 - solute carrier family 23 (ascorbic acid transporter), member 2, SLC16A13 - solute carrier family 16, member 13, SLC2A9 - solute carrier family …
GO:0016709	oxidoreductase activity, acting on paired donors, with incorporation or reduction of molecular oxygen, NAD(P)H as one donor, and incorporation of one atom of oxygen	4.72e-05	0.00862	14.03	3368	8	150	5	[SQLE - squalene epoxidase, CYP1A1 - cytochrome p450, family 1, subfamily a, polypeptide 1, FMO1 - flavin containing monooxygenase 1, CYP26A1 - cytochrome p450, family 26, subfamily a, polypeptide 1, KMO - kynurenine 3-monooxygenase (kynurenine 3-hydroxylase)]
GO:0048037	cofactor binding	3.18e-05	0.00871	1.83	3368	100	884	48	[XDH - xanthine dehydrogenase, SGPL1 - sphingosine-1-phosphate lyase 1, ACOX3 - acyl-coa oxidase 3, pristanoyl, AGXT2 - alanine--glyoxylate aminotransferase 2, SUCLG1 - succinate-coa ligase, alpha subunit, ABAT - 4-aminobutyrate aminotransferase, FMO1 - flavin containing monooxygenase 1, GOT1 - glutamic-oxaloacetic transaminase 1, soluble, PNPO - pyridoxamine 5'-phosphate oxidase, DHCR24 - 24-deh…
GO:1903561	extracellular vesicle	0.000113	0.00875	1.23	3368	717	963	253	[DST - dystonin, LGALS8 - lectin, galactoside-binding, soluble, 8, SUCLG1 - succinate-coa ligase, alpha subunit, SPP2 - secreted phosphoprotein 2, 24kda, UBL3 - ubiquitin-like 3, ABAT - 4-aminobutyrate aminotransferase, WLS - wntless homolog (drosophila), BDH2 - 3-hydroxybutyrate dehydrogenase, type 2, IQGAP1 - iq motif containing gtpase activating protein 1, NAGA - n-acetylgalactosaminidase, alp…
GO:0015370	solute:sodium symporter activity	4.69e-05	0.00919	3.73	3368	9	902	9	[SLC6A12 - solute carrier family 6 (neurotransmitter transporter), member 12, SLC10A3 - solute carrier family 10, member 3, SLC23A1 - solute carrier family 23 (ascorbic acid transporter), member 1, SLC13A3 - solute carrier family 13 (sodium-dependent dicarboxylate transporter), member 3, SLC10A1 - solute carrier family 10 (sodium/bile acid cotransporter), member 1, SLC23A2 - solute carrier family…
GO:0043230	extracellular organelle	0.000113	0.00929	1.23	3368	717	963	253	[DST - dystonin, LGALS8 - lectin, galactoside-binding, soluble, 8, SUCLG1 - succinate-coa ligase, alpha subunit, WLS - wntless homolog (drosophila), ABAT - 4-aminobutyrate aminotransferase, UBL3 - ubiquitin-like 3, SPP2 - secreted phosphoprotein 2, 24kda, BDH2 - 3-hydroxybutyrate dehydrogenase, type 2, IQGAP1 - iq motif containing gtpase activating protein 1, NAGA - n-acetylgalactosaminidase, alp…
GO:0005215	transporter activity	5.43e-05	0.00932	1.46	3368	228	968	96	[NIPA2 - non imprinted in prader-willi/angelman syndrome 2, SLC6A12 - solute carrier family 6 (neurotransmitter transporter), member 12, TOMM40 - translocase of outer mitochondrial membrane 40 homolog (yeast), SLC2A8 - solute carrier family 2 (facilitated glucose transporter), member 8, TMEM38B - transmembrane protein 38b, SLC16A13 - solute carrier family 16, member 13, FABP1 - fatty acid binding…
GO:0022892	substrate-specific transporter activity	3.08e-05	0.00938	1.51	3368	200	982	88	[NIPA2 - non imprinted in prader-willi/angelman syndrome 2, SLC6A12 - solute carrier family 6 (neurotransmitter transporter), member 12, TOMM40 - translocase of outer mitochondrial membrane 40 homolog (yeast), SLC2A8 - solute carrier family 2 (facilitated glucose transporter), member 8, TMEM38B - transmembrane protein 38b, SLC16A13 - solute carrier family 16, member 13, FABP1 - fatty acid binding…
GO:0016209	antioxidant activity	4.47e-05	0.00943	7.46	3368	21	172	8	[IYD - iodotyrosine deiodinase, FAM213B - family with sequence similarity 213, member b, APOM - apolipoprotein m, SOD3 - superoxide dismutase 3, extracellular, NQO1 - nad(p)h dehydrogenase, quinone 1, TP53INP1 - tumor protein p53 inducible nuclear protein 1, FABP1 - fatty acid binding protein 1, liver, APOA4 - apolipoprotein a-iv]
GO:0048545	response to steroid hormone	3.72e-05	0.00989	2.64	3368	52	565	23	[DDIT4 - dna-damage-inducible transcript 4, TSPO - translocator protein (18kda), IGFBP2 - insulin-like growth factor binding protein 2, 36kda, PAQR9 - progestin and adipoq receptor family member ix, IL1RN - interleukin 1 receptor antagonist, CDKN1A - cyclin-dependent kinase inhibitor 1a (p21, cip1), GJB2 - gap junction protein, beta 2, 26kda, GOT1 - glutamic-oxaloacetic transaminase 1, soluble, A…
GO:0001968	fibronectin binding	4.44e-05	0.0101	9.85	3368	9	228	6	[CTGF - connective tissue growth factor, CTSK - cathepsin k, THBS1 - thrombospondin 1, IGFBP3 - insulin-like growth factor binding protein 3, FBLN1 - fibulin 1, SDC4 - syndecan 4]
GO:0010817	regulation of hormone levels	4.67e-05	0.0112	2.06	3368	103	603	38	[LTBP4 - latent transforming growth factor beta binding protein 4, SGPL1 - sphingosine-1-phosphate lyase 1, SERP1 - stress-associated endoplasmic reticulum protein 1, LRP5 - low density lipoprotein receptor-related protein 5, EGFR - epidermal growth factor receptor, ESR1 - estrogen receptor 1, IRS2 - insulin receptor substrate 2, GPLD1 - glycosylphosphatidylinositol specific phospholipase d1, SLC…
GO:0006732	coenzyme metabolic process	5.01e-05	0.0112	1.82	3368	100	869	47	[THTPA - thiamine triphosphatase, GALK1 - galactokinase 1, ELOVL2 - elovl fatty acid elongase 2, ACOT13 - acyl-coa thioesterase 13, CROT - carnitine o-octanoyltransferase, ADCK3 - aarf domain containing kinase 3, SLC5A6 - solute carrier family 5 (sodium/multivitamin and iodide cotransporter), member 6, FMO1 - flavin containing monooxygenase 1, PNPO - pyridoxamine 5'-phosphate oxidase, AASS - amin…
GO:0098869	cellular oxidant detoxification	4.47e-05	0.0113	7.46	3368	21	172	8	[IYD - iodotyrosine deiodinase, FAM213B - family with sequence similarity 213, member b, APOM - apolipoprotein m, SOD3 - superoxide dismutase 3, extracellular, NQO1 - nad(p)h dehydrogenase, quinone 1, FABP1 - fatty acid binding protein 1, liver, TP53INP1 - tumor protein p53 inducible nuclear protein 1, APOA4 - apolipoprotein a-iv]
GO:0008610	lipid biosynthetic process	4.58e-05	0.0113	1.85	3368	170	557	52	[ELOVL2 - elovl fatty acid elongase 2, PGAP2 - post-gpi attachment to proteins 2, AMACR - alpha-methylacyl-coa racemase, APOA4 - apolipoprotein a-iv, CD74 - cd74 molecule, major histocompatibility complex, class ii invariant chain, IRS2 - insulin receptor substrate 2, CYP39A1 - cytochrome p450, family 39, subfamily a, polypeptide 1, INSIG2 - insulin induced gene 2, DPM2 - dolichyl-phosphate manno…
GO:1901566	organonitrogen compound biosynthetic process	4.81e-05	0.0113	1.53	3368	225	820	84	[UPP2 - uridine phosphorylase 2, ELOVL2 - elovl fatty acid elongase 2, PAWR - prkc, apoptosis, wt1, regulator, PYCRL - pyrroline-5-carboxylate reductase-like, RPL15 - ribosomal protein l15, ABAT - 4-aminobutyrate aminotransferase, GOT1 - glutamic-oxaloacetic transaminase 1, soluble, PNPO - pyridoxamine 5'-phosphate oxidase, SDC4 - syndecan 4, AASS - aminoadipate-semialdehyde synthase, OTC - ornit…
GO:0033993	response to lipid	5e-05	0.0115	1.84	3368	165	577	52	[PAQR9 - progestin and adipoq receptor family member ix, HNRNPA0 - heterogeneous nuclear ribonucleoprotein a0, FMO1 - flavin containing monooxygenase 1, GOT1 - glutamic-oxaloacetic transaminase 1, soluble, ABCA2 - atp-binding cassette, sub-family a (abc1), member 2, TICAM1 - toll-like receptor adaptor molecule 1, CTGF - connective tissue growth factor, DCN - decorin, SPARC - secreted protein, aci…
GO:1990748	cellular detoxification	4.47e-05	0.0116	7.46	3368	21	172	8	[IYD - iodotyrosine deiodinase, FAM213B - family with sequence similarity 213, member b, APOM - apolipoprotein m, SOD3 - superoxide dismutase 3, extracellular, NQO1 - nad(p)h dehydrogenase, quinone 1, FABP1 - fatty acid binding protein 1, liver, TP53INP1 - tumor protein p53 inducible nuclear protein 1, APOA4 - apolipoprotein a-iv]
GO:0004497	monooxygenase activity	8.75e-05	0.012	5.98	3368	14	322	8	[SQLE - squalene epoxidase, CYP39A1 - cytochrome p450, family 39, subfamily a, polypeptide 1, PAH - phenylalanine hydroxylase, CYP1A1 - cytochrome p450, family 1, subfamily a, polypeptide 1, CYP2U1 - cytochrome p450, family 2, subfamily u, polypeptide 1, FMO1 - flavin containing monooxygenase 1, CYP26A1 - cytochrome p450, family 26, subfamily a, polypeptide 1, KMO - kynurenine 3-monooxygenase (ky…
GO:0015718	monocarboxylic acid transport	5.49e-05	0.0121	6.7	3368	39	116	9	[MFSD2A - major facilitator superfamily domain containing 2a, SLC16A12 - solute carrier family 16, member 12, CROT - carnitine o-octanoyltransferase, ACSL4 - acyl-coa synthetase long-chain family member 4, SLC16A7 - solute carrier family 16 (monocarboxylate transporter), member 7, SLC16A13 - solute carrier family 16, member 13, FABP1 - fatty acid binding protein 1, liver, THRSP - thyroid hormone …
GO:0044459	plasma membrane part	0.000169	0.0123	1.39	3368	387	765	122	[DST - dystonin, EMP2 - epithelial membrane protein 2, SLC16A13 - solute carrier family 16, member 13, CDH1 - cadherin 1, type 1, e-cadherin (epithelial), WLS - wntless homolog (drosophila), SLC22A18 - solute carrier family 22, member 18, CXCL12 - chemokine (c-x-c motif) ligand 12, FAM73B - family with sequence similarity 73, member b, ABCA2 - atp-binding cassette, sub-family a (abc1), member 2, …
GO:0046943	carboxylic acid transmembrane transporter activity	8.13e-05	0.0124	2.36	3368	31	968	21	[SLC38A3 - solute carrier family 38, member 3, SLC23A1 - solute carrier family 23 (ascorbic acid transporter), member 1, SLC6A12 - solute carrier family 6 (neurotransmitter transporter), member 12, SLC16A12 - solute carrier family 16, member 12, SLC23A2 - solute carrier family 23 (ascorbic acid transporter), member 2, SLC16A13 - solute carrier family 16, member 13, ABCC2 - atp-binding cassette, s…
GO:0005319	lipid transporter activity	8.66e-05	0.0125	2.65	3368	33	733	19	[APOA5 - apolipoprotein a-v, TSPO - translocator protein (18kda), GLTPD2 - glycolipid transfer protein domain containing 2, FABP1 - fatty acid binding protein 1, liver, ATP9A - atpase, class ii, type 9a, ABCB11 - atp-binding cassette, sub-family b (mdr/tap), member 11, APOA4 - apolipoprotein a-iv, SLC10A3 - solute carrier family 10, member 3, OSBPL1A - oxysterol binding protein-like 1a, RBP4 - re…
GO:0070062	extracellular exosome	0.000185	0.0128	1.23	3368	715	963	251	[DST - dystonin, LGALS8 - lectin, galactoside-binding, soluble, 8, SUCLG1 - succinate-coa ligase, alpha subunit, WLS - wntless homolog (drosophila), ABAT - 4-aminobutyrate aminotransferase, UBL3 - ubiquitin-like 3, SPP2 - secreted phosphoprotein 2, 24kda, BDH2 - 3-hydroxybutyrate dehydrogenase, type 2, IQGAP1 - iq motif containing gtpase activating protein 1, NAGA - n-acetylgalactosaminidase, alp…
GO:0016829	lyase activity	8.01e-05	0.0129	2.43	3368	51	651	24	[SGPL1 - sphingosine-1-phosphate lyase 1, DAK - dihydroxyacetone kinase 2 homolog (s. cerevisiae), PCK1 - phosphoenolpyruvate carboxykinase 1 (soluble), CSAD - cysteine sulfinic acid decarboxylase, GOT1 - glutamic-oxaloacetic transaminase 1, soluble, NTHL1 - nth endonuclease iii-like 1 (e. coli), UROC1 - urocanate hydratase 1, CA5A - carbonic anhydrase va, mitochondrial, ETNPPL - ethanolamine-pho…
GO:0005578	proteinaceous extracellular matrix	0.000202	0.0133	3.77	3368	27	397	12	[CTGF - connective tissue growth factor, LTBP4 - latent transforming growth factor beta binding protein 4, CYR61 - cysteine-rich, angiogenic inducer, 61, TIMP2 - timp metallopeptidase inhibitor 2, MMP19 - matrix metallopeptidase 19, DCN - decorin, ECM1 - extracellular matrix protein 1, GPLD1 - glycosylphosphatidylinositol specific phospholipase d1, GPC4 - glypican 4, CHI3L1 - chitinase 3-like 1 (…
GO:0044425	membrane part	0.000212	0.0133	1.18	3368	1101	911	350	[NIPA2 - non imprinted in prader-willi/angelman syndrome 2, EMP2 - epithelial membrane protein 2, DST - dystonin, ELOVL2 - elovl fatty acid elongase 2, DNAJB2 - dnaj (hsp40) homolog, subfamily b, member 2, BET1 - bet1 golgi vesicular membrane trafficking protein, SLC16A13 - solute carrier family 16, member 13, PAQR9 - progestin and adipoq receptor family member ix, NDUFA6 - nadh dehydrogenase (ub…
GO:0005539	glycosaminoglycan binding	0.000103	0.0135	2.37	3368	42	779	23	[LTBP4 - latent transforming growth factor beta binding protein 4, F11 - coagulation factor xi, FGFR2 - fibroblast growth factor receptor 2, VEGFB - vascular endothelial growth factor b, PCOLCE - procollagen c-endopeptidase enhancer, APOA5 - apolipoprotein a-v, IGJ - immunoglobulin j polypeptide, linker protein for immunoglobulin alpha and mu polypeptides, ANGPTL3 - angiopoietin-like 3, FGFRL1 - …
GO:0098754	detoxification	6.69e-05	0.0141	7.12	3368	22	172	8	[IYD - iodotyrosine deiodinase, FAM213B - family with sequence similarity 213, member b, APOM - apolipoprotein m, SOD3 - superoxide dismutase 3, extracellular, NQO1 - nad(p)h dehydrogenase, quinone 1, FABP1 - fatty acid binding protein 1, liver, TP53INP1 - tumor protein p53 inducible nuclear protein 1, APOA4 - apolipoprotein a-iv]
GO:0046470	phosphatidylcholine metabolic process	6.58e-05	0.0142	3.51	3368	27	497	14	[APOA5 - apolipoprotein a-v, PLA2G15 - phospholipase a2, group xv, PLBD1 - phospholipase b domain containing 1, LPIN1 - lipin 1, PEMT - phosphatidylethanolamine n-methyltransferase, PLA2G6 - phospholipase a2, group vi (cytosolic, calcium-independent), APOA4 - apolipoprotein a-iv, TMEM86B - transmembrane protein 86b, ENPP2 - ectonucleotide pyrophosphatase/phosphodiesterase 2, LIPC - lipase, hepati…
GO:0031907	microbody lumen	0.000252	0.0144	2.6	3368	24	864	16	[PEX7 - peroxisomal biogenesis factor 7, ACOX3 - acyl-coa oxidase 3, pristanoyl, CROT - carnitine o-octanoyltransferase, FABP1 - fatty acid binding protein 1, liver, EHHADH - enoyl-coa, hydratase/3-hydroxyacyl coa dehydrogenase, AMACR - alpha-methylacyl-coa racemase, HACL1 - 2-hydroxyacyl-coa lyase 1, PIPOX - pipecolic acid oxidase, NUDT19 - nudix (nucleoside diphosphate linked moiety x)-type mot…
GO:0035383	thioester metabolic process	7.24e-05	0.0147	2.26	3368	38	942	24	[ELOVL2 - elovl fatty acid elongase 2, ACOT13 - acyl-coa thioesterase 13, ACLY - atp citrate lyase, ACSS2 - acyl-coa synthetase short-chain family member 2, ELOVL5 - elovl fatty acid elongase 5, GCDH - glutaryl-coa dehydrogenase, ACSL5 - acyl-coa synthetase long-chain family member 5, PMVK - phosphomevalonate kinase, GPAM - glycerol-3-phosphate acyltransferase, mitochondrial, ACOT12 - acyl-coa th…
GO:0022804	active transmembrane transporter activity	0.00012	0.0149	1.86	3368	75	943	39	[SLC6A12 - solute carrier family 6 (neurotransmitter transporter), member 12, SLC2A8 - solute carrier family 2 (facilitated glucose transporter), member 8, SLC5A6 - solute carrier family 5 (sodium/multivitamin and iodide cotransporter), member 6, SLC16A13 - solute carrier family 16, member 13, SLC2A9 - solute carrier family 2 (facilitated glucose transporter), member 9, ABCC2 - atp-binding casset…
GO:0005782	peroxisomal matrix	0.000252	0.015	2.6	3368	24	864	16	[PEX7 - peroxisomal biogenesis factor 7, ACOX3 - acyl-coa oxidase 3, pristanoyl, CROT - carnitine o-octanoyltransferase, FABP1 - fatty acid binding protein 1, liver, EHHADH - enoyl-coa, hydratase/3-hydroxyacyl coa dehydrogenase, AMACR - alpha-methylacyl-coa racemase, HACL1 - 2-hydroxyacyl-coa lyase 1, PIPOX - pipecolic acid oxidase, NUDT19 - nudix (nucleoside diphosphate linked moiety x)-type mot…
GO:0006637	acyl-CoA metabolic process	7.24e-05	0.015	2.26	3368	38	942	24	[ELOVL2 - elovl fatty acid elongase 2, ACOT13 - acyl-coa thioesterase 13, ACLY - atp citrate lyase, ACSS2 - acyl-coa synthetase short-chain family member 2, ELOVL5 - elovl fatty acid elongase 5, GCDH - glutaryl-coa dehydrogenase, ACSL5 - acyl-coa synthetase long-chain family member 5, PMVK - phosphomevalonate kinase, GPAM - glycerol-3-phosphate acyltransferase, mitochondrial, ACOT12 - acyl-coa th…
GO:1901700	response to oxygen-containing compound	7.85e-05	0.0156	1.52	3368	324	607	89	[PRKACB - protein kinase, camp-dependent, catalytic, beta, FABP1 - fatty acid binding protein 1, liver, HNRNPA0 - heterogeneous nuclear ribonucleoprotein a0, RPL15 - ribosomal protein l15, GOT1 - glutamic-oxaloacetic transaminase 1, soluble, CXCL12 - chemokine (c-x-c motif) ligand 12, FMO1 - flavin containing monooxygenase 1, TICAM1 - toll-like receptor adaptor molecule 1, APOA4 - apolipoprotein …
GO:0046890	regulation of lipid biosynthetic process	8.91e-05	0.0173	2.39	3368	66	556	26	[ADIPOR2 - adiponectin receptor 2, APOA4 - apolipoprotein a-iv, PDK4 - pyruvate dehydrogenase kinase, isozyme 4, MVK - mevalonate kinase, GPLD1 - glycosylphosphatidylinositol specific phospholipase d1, INSIG2 - insulin induced gene 2, ACADL - acyl-coa dehydrogenase, long chain, RGN - regucalcin, FASN - fatty acid synthase, TM7SF2 - transmembrane 7 superfamily member 2, APOA5 - apolipoprotein a-v,…
GO:0042579	microbody	0.000337	0.0184	2.02	3368	52	900	28	[XDH - xanthine dehydrogenase, ACOX3 - acyl-coa oxidase 3, pristanoyl, CROT - carnitine o-octanoyltransferase, AMACR - alpha-methylacyl-coa racemase, HSDL2 - hydroxysteroid dehydrogenase like 2, PXMP2 - peroxisomal membrane protein 2, 22kda, SCP2 - sterol carrier protein 2, ACSL4 - acyl-coa synthetase long-chain family member 4, ABCD3 - atp-binding cassette, sub-family d (ald), member 3, PEX7 - p…
GO:0070279	vitamin B6 binding	0.000174	0.0199	2.88	3368	20	820	14	[SGPL1 - sphingosine-1-phosphate lyase 1, GCAT - glycine c-acetyltransferase, AGXT2 - alanine--glyoxylate aminotransferase 2, CSAD - cysteine sulfinic acid decarboxylase, ABAT - 4-aminobutyrate aminotransferase, GOT1 - glutamic-oxaloacetic transaminase 1, soluble, PNPO - pyridoxamine 5'-phosphate oxidase, KYNU - kynureninase, ETNPPL - ethanolamine-phosphate phospho-lyase, TAT - tyrosine aminotran…
GO:0043394	proteoglycan binding	0.000187	0.0205	11.14	3368	9	168	5	[CTSK - cathepsin k, HRG - histidine-rich glycoprotein, THBS1 - thrombospondin 1, GPC4 - glypican 4, GPNMB - glycoprotein (transmembrane) nmb]
GO:0030170	pyridoxal phosphate binding	0.000174	0.0208	2.88	3368	20	820	14	[SGPL1 - sphingosine-1-phosphate lyase 1, GCAT - glycine c-acetyltransferase, AGXT2 - alanine--glyoxylate aminotransferase 2, CSAD - cysteine sulfinic acid decarboxylase, ABAT - 4-aminobutyrate aminotransferase, GOT1 - glutamic-oxaloacetic transaminase 1, soluble, PNPO - pyridoxamine 5'-phosphate oxidase, ETNPPL - ethanolamine-phosphate phospho-lyase, KYNU - kynureninase, TAT - tyrosine aminotran…
GO:0015075	ion transmembrane transporter activity	0.000212	0.0224	1.64	3368	119	968	56	[NIPA2 - non imprinted in prader-willi/angelman syndrome 2, SLC6A12 - solute carrier family 6 (neurotransmitter transporter), member 12, SLC2A8 - solute carrier family 2 (facilitated glucose transporter), member 8, TMEM38B - transmembrane protein 38b, SLC16A13 - solute carrier family 16, member 13, SFXN5 - sideroflexin 5, SLC22A18 - solute carrier family 22, member 18, SLC7A2 - solute carrier fam…
GO:0006027	glycosaminoglycan catabolic process	0.000125	0.0229	3.24	3368	16	779	12	[SDC2 - syndecan 2, SDC3 - syndecan 3, DCN - decorin, PRELP - proline/arginine-rich end leucine-rich repeat protein, SGSH - n-sulfoglucosamine sulfohydrolase, GPC4 - glypican 4, CD44 - cd44 molecule (indian blood group), LYVE1 - lymphatic vessel endothelial hyaluronan receptor 1, HYAL1 - hyaluronoglucosaminidase 1, CHP1 - calcineurin-like ef-hand protein 1, GALNS - galactosamine (n-acetyl)-6-sulf…
GO:0006026	aminoglycan catabolic process	0.000125	0.0233	3.24	3368	16	779	12	[SDC2 - syndecan 2, SDC3 - syndecan 3, DCN - decorin, PRELP - proline/arginine-rich end leucine-rich repeat protein, SGSH - n-sulfoglucosamine sulfohydrolase, GPC4 - glypican 4, CD44 - cd44 molecule (indian blood group), LYVE1 - lymphatic vessel endothelial hyaluronan receptor 1, HYAL1 - hyaluronoglucosaminidase 1, CHP1 - calcineurin-like ef-hand protein 1, GALNS - galactosamine (n-acetyl)-6-sulf…
GO:0009725	response to hormone	0.000123	0.0235	1.81	3368	146	624	49	[TIMP2 - timp metallopeptidase inhibitor 2, PRKACB - protein kinase, camp-dependent, catalytic, beta, PAQR9 - progestin and adipoq receptor family member ix, CXCL12 - chemokine (c-x-c motif) ligand 12, GOT1 - glutamic-oxaloacetic transaminase 1, soluble, ABCA2 - atp-binding cassette, sub-family a (abc1), member 2, CTGF - connective tissue growth factor, OTC - ornithine carbamoyltransferase, IRS2 …
GO:0008202	steroid metabolic process	0.000141	0.0255	2.01	3368	77	740	34	[LSS - lanosterol synthase (2,3-oxidosqualene-lanosterol cyclase), SGPL1 - sphingosine-1-phosphate lyase 1, LGMN - legumain, ANGPTL3 - angiopoietin-like 3, AMACR - alpha-methylacyl-coa racemase, LRP5 - low density lipoprotein receptor-related protein 5, ABCB11 - atp-binding cassette, sub-family b (mdr/tap), member 11, APOA4 - apolipoprotein a-iv, DHCR24 - 24-dehydrocholesterol reductase, OSBPL1A …
GO:0016298	lipase activity	0.000295	0.0289	5.17	3368	29	202	9	[NOTUM - notum pectinacetylesterase homolog (drosophila), LIPC - lipase, hepatic, MGLL - monoglyceride lipase, ABHD6 - abhydrolase domain containing 6, GPLD1 - glycosylphosphatidylinositol specific phospholipase d1, ABHD3 - abhydrolase domain containing 3, PLBD1 - phospholipase b domain containing 1, ABHD1 - abhydrolase domain containing 1, PLA2G7 - phospholipase a2, group vii (platelet-activatin…
GO:0014070	response to organic cyclic compound	0.000165	0.0292	1.76	3368	171	594	53	[PRKACB - protein kinase, camp-dependent, catalytic, beta, PAQR9 - progestin and adipoq receptor family member ix, GOT1 - glutamic-oxaloacetic transaminase 1, soluble, TICAM1 - toll-like receptor adaptor molecule 1, ABCA2 - atp-binding cassette, sub-family a (abc1), member 2, APOA4 - apolipoprotein a-iv, KIF1B - kinesin family member 1b, CTGF - connective tissue growth factor, OTC - ornithine car…
[truncated: 28 more rows]

## Sheet: lung, low to high
GO Term	Description	P-value	FDR q-value	Enrichment	N	B	n	b	Genes
[truncated: 88 more rows]

[truncated: 5 more sheets: lung, high to low, muscle, low to high, muscle, high to low, testis, low to high, testis, high to low]
