# Supplementary material for: A quantitative framework for characterizing the evolutionary history of mammalian gene expression
Source: HighWire-hosted journal article supplement (doi:10.1101/gr.237636.118), 2018-12-14
Supplement: Supplemental_Table_S3.xlsx [file Supplemental_Table_S3.xlsx]

## Sheet: README
Table S3. GO enrichment results of genes, binned by high and low sequence conservation and expression variation (combined across all tissues). Background set is all genes expressed > 5 TPM with correspondingly high or low variance.
Columns	Explanation
GO Term	Enriched GO term
Description	Description of GO term
P-value	P-value
FDR q-value	FDR q-value
Enrichment	Enrichment ratio
N	Total number of background genes
B	Number of background genes belonging to corresponding GO term
n	Total number of test genes
b	Number of test genes belonging to corresponding GO term
Genes	Names of test genes belonging to corresponding GO term

## Sheet: high conservation, low variance
GO Term	Description	P-value	FDR q-value	Enrichment	N	B	n	b	Genes
GO:0036211	protein modification process	3.94e-19	2.15e-15	1.17	4577	1063	2963	807	[BMP2K - bmp2 inducible kinase, GFPT1 - glutamine--fructose-6-phosphate transaminase 1, GGCX - gamma-glutamyl carboxylase, TADA1 - transcriptional adaptor 1, GALNT10 - udp-n-acetyl-alpha-d-galactosamine:polypeptide n-acetylgalactosaminyltransferase 10 (galnac-t10), KAT2A - k(lysine) acetyltransferase 2a, UBE2Q1 - ubiquitin-conjugating enzyme e2q family member 1, BRD8 - bromodomain containing 8, P…
GO:0006464	cellular protein modification process	3.94e-19	4.3e-15	1.17	4577	1063	2963	807	[BMP2K - bmp2 inducible kinase, GFPT1 - glutamine--fructose-6-phosphate transaminase 1, GGCX - gamma-glutamyl carboxylase, TADA1 - transcriptional adaptor 1, GALNT10 - udp-n-acetyl-alpha-d-galactosamine:polypeptide n-acetylgalactosaminyltransferase 10 (galnac-t10), KAT2A - k(lysine) acetyltransferase 2a, UBE2Q1 - ubiquitin-conjugating enzyme e2q family member 1, BRD8 - bromodomain containing 8, P…
GO:1901564	organonitrogen compound metabolic process	1.68e-18	6.1e-15	1.13	4577	1521	2963	1116	[AFG3L2 - afg3 atpase family member 3-like 2 (s. cerevisiae), BMP2K - bmp2 inducible kinase, GFPT1 - glutamine--fructose-6-phosphate transaminase 1, TADA1 - transcriptional adaptor 1, GGCX - gamma-glutamyl carboxylase, AARS - alanyl-trna synthetase, LRRC16A - leucine rich repeat containing 16a, ABAT - 4-aminobutyrate aminotransferase, ABCF1 - atp-binding cassette, sub-family f (gcn20), member 1, …
GO:0044237	cellular metabolic process	5.31e-18	1.45e-14	1.09	4577	2494	2963	1753	[AFG3L2 - afg3 atpase family member 3-like 2 (s. cerevisiae), BMP2K - bmp2 inducible kinase, EXOSC10 - exosome component 10, TADA1 - transcriptional adaptor 1, STARD3 - star-related lipid transfer (start) domain containing 3, AARS - alanyl-trna synthetase, PNN - pinin, desmosome associated protein, LRRC16A - leucine rich repeat containing 16a, ABAT - 4-aminobutyrate aminotransferase, ABCF1 - atp-…
GO:0044267	cellular protein metabolic process	4.3e-17	9.38e-14	1.16	4577	1117	2963	837	[AFG3L2 - afg3 atpase family member 3-like 2 (s. cerevisiae), BMP2K - bmp2 inducible kinase, GFPT1 - glutamine--fructose-6-phosphate transaminase 1, GGCX - gamma-glutamyl carboxylase, TADA1 - transcriptional adaptor 1, ABCF1 - atp-binding cassette, sub-family f (gcn20), member 1, GALNT10 - udp-n-acetyl-alpha-d-galactosamine:polypeptide n-acetylgalactosaminyltransferase 10 (galnac-t10), KAT2A - k(…
GO:0043412	macromolecule modification	1.02e-16	1.85e-13	1.15	4577	1160	2963	865	[BMP2K - bmp2 inducible kinase, GFPT1 - glutamine--fructose-6-phosphate transaminase 1, GGCX - gamma-glutamyl carboxylase, TADA1 - transcriptional adaptor 1, AARS - alanyl-trna synthetase, GALNT10 - udp-n-acetyl-alpha-d-galactosamine:polypeptide n-acetylgalactosaminyltransferase 10 (galnac-t10), ASCC3 - activating signal cointegrator 1 complex subunit 3, KAT2A - k(lysine) acetyltransferase 2a, UB…
GO:0009987	cellular process	3.51e-16	5.47e-13	1.04	4577	3800	2963	2560	[AFG3L2 - afg3 atpase family member 3-like 2 (s. cerevisiae), BMP2K - bmp2 inducible kinase, EXOSC10 - exosome component 10, AGAP3 - arfgap with gtpase domain, ankyrin repeat and ph domain 3, KDELR1 - kdel (lys-asp-glu-leu) endoplasmic reticulum protein retention receptor 1, TADA1 - transcriptional adaptor 1, AP3M2 - adaptor-related protein complex 3, mu 2 subunit, STARD3 - star-related lipid tra…
GO:0008150	biological_process	2.39e-14	3.26e-11	1.02	4577	4248	2963	2815	[AFG3L2 - afg3 atpase family member 3-like 2 (s. cerevisiae), BMP2K - bmp2 inducible kinase, EXOSC10 - exosome component 10, AGAP3 - arfgap with gtpase domain, ankyrin repeat and ph domain 3, KDELR1 - kdel (lys-asp-glu-leu) endoplasmic reticulum protein retention receptor 1, TADA1 - transcriptional adaptor 1, AP3M2 - adaptor-related protein complex 3, mu 2 subunit, STARD3 - star-related lipid tra…
GO:0071704	organic substance metabolic process	4.29e-14	4.69e-11	1.07	4577	2559	2963	1777	[AFG3L2 - afg3 atpase family member 3-like 2 (s. cerevisiae), BMP2K - bmp2 inducible kinase, EXOSC10 - exosome component 10, TADA1 - transcriptional adaptor 1, STARD3 - star-related lipid transfer (start) domain containing 3, AARS - alanyl-trna synthetase, PNN - pinin, desmosome associated protein, LRRC16A - leucine rich repeat containing 16a, ABAT - 4-aminobutyrate aminotransferase, ABCF1 - atp-…
GO:0019538	protein metabolic process	4.05e-14	4.92e-11	1.13	4577	1277	2963	934	[AFG3L2 - afg3 atpase family member 3-like 2 (s. cerevisiae), BMP2K - bmp2 inducible kinase, GFPT1 - glutamine--fructose-6-phosphate transaminase 1, GGCX - gamma-glutamyl carboxylase, TADA1 - transcriptional adaptor 1, ABCF1 - atp-binding cassette, sub-family f (gcn20), member 1, GALNT10 - udp-n-acetyl-alpha-d-galactosamine:polypeptide n-acetylgalactosaminyltransferase 10 (galnac-t10), KAT2A - k(…
GO:0006810	transport	1.04e-13	9.49e-11	1.13	4577	1179	2963	866	[AFG3L2 - afg3 atpase family member 3-like 2 (s. cerevisiae), SYMPK - symplekin, KDELR1 - kdel (lys-asp-glu-leu) endoplasmic reticulum protein retention receptor 1, TTC26 - tetratricopeptide repeat domain 26, AP3M2 - adaptor-related protein complex 3, mu 2 subunit, STARD3 - star-related lipid transfer (start) domain containing 3, GDI1 - gdp dissociation inhibitor 1, LRRC16A - leucine rich repeat …
GO:0006807	nitrogen compound metabolic process	1.17e-13	9.8e-11	1.08	4577	2339	2963	1633	[AFG3L2 - afg3 atpase family member 3-like 2 (s. cerevisiae), BMP2K - bmp2 inducible kinase, EXOSC10 - exosome component 10, TADA1 - transcriptional adaptor 1, AARS - alanyl-trna synthetase, PNN - pinin, desmosome associated protein, LRRC16A - leucine rich repeat containing 16a, ABAT - 4-aminobutyrate aminotransferase, ABCF1 - atp-binding cassette, sub-family f (gcn20), member 1, SERINC3 - serine…
GO:0008152	metabolic process	1.03e-13	1.02e-10	1.07	4577	2668	2963	1845	[AFG3L2 - afg3 atpase family member 3-like 2 (s. cerevisiae), BMP2K - bmp2 inducible kinase, EXOSC10 - exosome component 10, TADA1 - transcriptional adaptor 1, STARD3 - star-related lipid transfer (start) domain containing 3, AARS - alanyl-trna synthetase, PNN - pinin, desmosome associated protein, LRRC16A - leucine rich repeat containing 16a, ABAT - 4-aminobutyrate aminotransferase, ABCF1 - atp-…
GO:0044238	primary metabolic process	1.66e-13	1.29e-10	1.07	4577	2478	2963	1722	[AFG3L2 - afg3 atpase family member 3-like 2 (s. cerevisiae), BMP2K - bmp2 inducible kinase, EXOSC10 - exosome component 10, TADA1 - transcriptional adaptor 1, STARD3 - star-related lipid transfer (start) domain containing 3, AARS - alanyl-trna synthetase, PNN - pinin, desmosome associated protein, ABAT - 4-aminobutyrate aminotransferase, ABCF1 - atp-binding cassette, sub-family f (gcn20), member…
GO:0016567	protein ubiquitination	5.48e-13	3.99e-10	1.3	4577	260	2963	219	[PCGF5 - polycomb group ring finger 5, BCOR - bcl6 corepressor, KLHDC8B - kelch domain containing 8b, EPAS1 - endothelial pas domain protein 1, RNF14 - ring finger protein 14, MARCH6 - membrane-associated ring finger (c3hc4) 6, e3 ubiquitin protein ligase, FBXO45 - f-box protein 45, DERL1 - derlin 1, DCAF5 - ddb1 and cul4 associated factor 5, UBE2Q1 - ubiquitin-conjugating enzyme e2q family membe…
GO:0051234	establishment of localization	1.03e-12	7e-10	1.13	4577	1209	2963	882	[AFG3L2 - afg3 atpase family member 3-like 2 (s. cerevisiae), KDELR1 - kdel (lys-asp-glu-leu) endoplasmic reticulum protein retention receptor 1, SYMPK - symplekin, TTC26 - tetratricopeptide repeat domain 26, AP3M2 - adaptor-related protein complex 3, mu 2 subunit, STARD3 - star-related lipid transfer (start) domain containing 3, GDI1 - gdp dissociation inhibitor 1, LRRC16A - leucine rich repeat …
GO:0032446	protein modification by small protein conjugation	3.45e-12	2.22e-09	1.27	4577	292	2963	241	[PCGF5 - polycomb group ring finger 5, BCOR - bcl6 corepressor, KLHDC8B - kelch domain containing 8b, EPAS1 - endothelial pas domain protein 1, RNF14 - ring finger protein 14, MARCH6 - membrane-associated ring finger (c3hc4) 6, e3 ubiquitin protein ligase, FBXO45 - f-box protein 45, DERL1 - derlin 1, DCAF5 - ddb1 and cul4 associated factor 5, UBE2Q1 - ubiquitin-conjugating enzyme e2q family membe…
GO:0070647	protein modification by small protein conjugation or removal	4.28e-12	2.59e-09	1.25	4577	358	2963	289	[PCGF5 - polycomb group ring finger 5, BCOR - bcl6 corepressor, KLHDC8B - kelch domain containing 8b, EPAS1 - endothelial pas domain protein 1, EP300 - e1a binding protein p300, RNF14 - ring finger protein 14, MARCH6 - membrane-associated ring finger (c3hc4) 6, e3 ubiquitin protein ligase, FBXO45 - f-box protein 45, DERL1 - derlin 1, DCAF5 - ddb1 and cul4 associated factor 5, KAT2A - k(lysine) ac…
GO:0051179	localization	4.64e-11	2.66e-08	1.11	4577	1377	2963	987	[AFG3L2 - afg3 atpase family member 3-like 2 (s. cerevisiae), EXOSC10 - exosome component 10, KDELR1 - kdel (lys-asp-glu-leu) endoplasmic reticulum protein retention receptor 1, SYMPK - symplekin, TTC26 - tetratricopeptide repeat domain 26, AP3M2 - adaptor-related protein complex 3, mu 2 subunit, STARD3 - star-related lipid transfer (start) domain containing 3, LRRC16A - leucine rich repeat conta…
GO:0065007	biological regulation	1.35e-10	7.38e-08	1.05	4577	3071	2963	2085	[AFG3L2 - afg3 atpase family member 3-like 2 (s. cerevisiae), BMP2K - bmp2 inducible kinase, EXOSC10 - exosome component 10, AGAP3 - arfgap with gtpase domain, ankyrin repeat and ph domain 3, KDELR1 - kdel (lys-asp-glu-leu) endoplasmic reticulum protein retention receptor 1, TADA1 - transcriptional adaptor 1, STARD3 - star-related lipid transfer (start) domain containing 3, AARS - alanyl-trna syn…
GO:0044260	cellular macromolecule metabolic process	2.68e-10	1.39e-07	1.08	4577	2033	2963	1416	[AFG3L2 - afg3 atpase family member 3-like 2 (s. cerevisiae), BMP2K - bmp2 inducible kinase, GFPT1 - glutamine--fructose-6-phosphate transaminase 1, EXOSC10 - exosome component 10, SYMPK - symplekin, GGCX - gamma-glutamyl carboxylase, TADA1 - transcriptional adaptor 1, AARS - alanyl-trna synthetase, PNN - pinin, desmosome associated protein, GRHL2 - grainyhead-like 2 (drosophila), ABCF1 - atp-bin…
GO:0071702	organic substance transport	3.62e-10	1.79e-07	1.17	4577	595	2963	451	[KDELR1 - kdel (lys-asp-glu-leu) endoplasmic reticulum protein retention receptor 1, SYMPK - symplekin, TTC26 - tetratricopeptide repeat domain 26, AP3M2 - adaptor-related protein complex 3, mu 2 subunit, STARD3 - star-related lipid transfer (start) domain containing 3, PDIA4 - protein disulfide isomerase family a, member 4, GDI1 - gdp dissociation inhibitor 1, VPS37A - vacuolar protein sorting 3…
GO:0050789	regulation of biological process	1.07e-09	5.08e-07	1.05	4577	2926	2963	1988	[AFG3L2 - afg3 atpase family member 3-like 2 (s. cerevisiae), BMP2K - bmp2 inducible kinase, EXOSC10 - exosome component 10, AGAP3 - arfgap with gtpase domain, ankyrin repeat and ph domain 3, TADA1 - transcriptional adaptor 1, AARS - alanyl-trna synthetase, LRRC16A - leucine rich repeat containing 16a, PNN - pinin, desmosome associated protein, ABAT - 4-aminobutyrate aminotransferase, CBX1 - chro…
GO:0071705	nitrogen compound transport	2.92e-09	1.33e-06	1.17	4577	521	2963	396	[KDELR1 - kdel (lys-asp-glu-leu) endoplasmic reticulum protein retention receptor 1, SYMPK - symplekin, TTC26 - tetratricopeptide repeat domain 26, AP3M2 - adaptor-related protein complex 3, mu 2 subunit, PDIA4 - protein disulfide isomerase family a, member 4, GDI1 - gdp dissociation inhibitor 1, VPS37A - vacuolar protein sorting 37 homolog a (s. cerevisiae), ABCB7 - atp-binding cassette, sub-fam…
GO:0006793	phosphorus metabolic process	4.28e-09	1.8e-06	1.15	4577	685	2963	509	[BMP2K - bmp2 inducible kinase, SPTAN1 - spectrin, alpha, non-erythrocytic 1, GFPT1 - glutamine--fructose-6-phosphate transaminase 1, DAPK2 - death-associated protein kinase 2, SCD5 - stearoyl-coa desaturase 5, LIMK1 - lim domain kinase 1, SERINC3 - serine incorporator 3, UAP1 - udp-n-acteylglucosamine pyrophosphorylase 1, PANK2 - pantothenate kinase 2, ACAT1 - acetyl-coa acetyltransferase 1, ACL…
GO:0050794	regulation of cellular process	4.25e-09	1.85e-06	1.05	4577	2792	2963	1899	[BMP2K - bmp2 inducible kinase, EXOSC10 - exosome component 10, AGAP3 - arfgap with gtpase domain, ankyrin repeat and ph domain 3, TADA1 - transcriptional adaptor 1, AARS - alanyl-trna synthetase, LRRC16A - leucine rich repeat containing 16a, PNN - pinin, desmosome associated protein, ABAT - 4-aminobutyrate aminotransferase, CBX1 - chromobox homolog 1, PLXNB1 - plexin b1, SERINC3 - serine incorpo…
GO:0032879	regulation of localization	6.26e-09	2.53e-06	1.13	4577	816	2963	598	[ZMYND8 - zinc finger, mynd-type containing 8, BMP2K - bmp2 inducible kinase, EXOSC10 - exosome component 10, DAPK2 - death-associated protein kinase 2, LRRC16A - leucine rich repeat containing 16a, GDI1 - gdp dissociation inhibitor 1, ABAT - 4-aminobutyrate aminotransferase, GEM - gtp binding protein overexpressed in skeletal muscle, CORO1C - coronin, actin binding protein, 1c, RABGAP1 - rab gtp…
GO:0044248	cellular catabolic process	7.54e-09	2.94e-06	1.19	4577	429	2963	330	[NCBP1 - nuclear cap binding protein subunit 1, 80kda, EXOSC10 - exosome component 10, MCCC1 - methylcrotonoyl-coa carboxylase 1 (alpha), HSD17B4 - hydroxysteroid (17-beta) dehydrogenase 4, BCKDK - branched chain ketoacid dehydrogenase kinase, ABAT - 4-aminobutyrate aminotransferase, VPS37A - vacuolar protein sorting 37 homolog a (s. cerevisiae), MARCH6 - membrane-associated ring finger (c3hc4) 6…
GO:0009894	regulation of catabolic process	7.91e-09	2.98e-06	1.22	4577	329	2963	259	[TOB1 - transducer of erbb2, 1, DAPK2 - death-associated protein kinase 2, METTL14 - methyltransferase like 14, EP300 - e1a binding protein p300, RNF14 - ring finger protein 14, RDX - radixin, UPF1 - upf1 regulator of nonsense transcripts homolog (yeast), KAT2A - k(lysine) acetyltransferase 2a, RAB3GAP1 - rab3 gtpase activating protein subunit 1 (catalytic), ZDHHC8 - zinc finger, dhhc-type contai…
GO:0048522	positive regulation of cellular process	1.02e-08	3.71e-06	1.09	4577	1509	2963	1062	[BMP2K - bmp2 inducible kinase, SYMPK - symplekin, LRRC16A - leucine rich repeat containing 16a, GDI1 - gdp dissociation inhibitor 1, ABAT - 4-aminobutyrate aminotransferase, GRHL2 - grainyhead-like 2 (drosophila), PLXNB1 - plexin b1, SERINC3 - serine incorporator 3, ABR - active bcr-related, CNOT11 - ccr4-not transcription complex, subunit 11, KAT2A - k(lysine) acetyltransferase 2a, ASIC2 - acid…
GO:0006796	phosphate-containing compound metabolic process	1.36e-08	4.8e-06	1.15	4577	662	2963	491	[BMP2K - bmp2 inducible kinase, SPTAN1 - spectrin, alpha, non-erythrocytic 1, GFPT1 - glutamine--fructose-6-phosphate transaminase 1, DAPK2 - death-associated protein kinase 2, LIMK1 - lim domain kinase 1, SERINC3 - serine incorporator 3, PANK2 - pantothenate kinase 2, ACAT1 - acetyl-coa acetyltransferase 1, ACLY - atp citrate lyase, NRG2 - neuregulin 2, SOX9 - sry (sex determining region y)-box …
GO:0051049	regulation of transport	1.43e-08	4.87e-06	1.16	4577	555	2963	417	[BMP2K - bmp2 inducible kinase, GDI1 - gdp dissociation inhibitor 1, ABAT - 4-aminobutyrate aminotransferase, GEM - gtp binding protein overexpressed in skeletal muscle, RABGAP1 - rab gtpase activating protein 1, ABR - active bcr-related, REEP2 - receptor accessory protein 2, KAT2A - k(lysine) acetyltransferase 2a, ASIC2 - acid-sensing (proton-gated) ion channel 2, LPAR3 - lysophosphatidic acid r…
GO:0051649	establishment of localization in cell	1.68e-08	5.56e-06	1.16	4577	541	2963	407	[AFG3L2 - afg3 atpase family member 3-like 2 (s. cerevisiae), SPTAN1 - spectrin, alpha, non-erythrocytic 1, KDELR1 - kdel (lys-asp-glu-leu) endoplasmic reticulum protein retention receptor 1, SYMPK - symplekin, TTC26 - tetratricopeptide repeat domain 26, AP3M2 - adaptor-related protein complex 3, mu 2 subunit, STARD3 - star-related lipid transfer (start) domain containing 3, GEM - gtp binding pro…
GO:0015031	protein transport	2.24e-08	7.2e-06	1.18	4577	420	2963	322	[TOB1 - transducer of erbb2, 1, KDELR1 - kdel (lys-asp-glu-leu) endoplasmic reticulum protein retention receptor 1, KIFAP3 - kinesin-associated protein 3, TTC26 - tetratricopeptide repeat domain 26, AP3M2 - adaptor-related protein complex 3, mu 2 subunit, SPIRE1 - spire actin nucleation factor 1, PDIA4 - protein disulfide isomerase family a, member 4, TRAK1 - trafficking protein, kinesin binding …
GO:0043170	macromolecule metabolic process	3.17e-08	9.9e-06	1.06	4577	2177	2963	1497	[AFG3L2 - afg3 atpase family member 3-like 2 (s. cerevisiae), BMP2K - bmp2 inducible kinase, GFPT1 - glutamine--fructose-6-phosphate transaminase 1, EXOSC10 - exosome component 10, SYMPK - symplekin, GGCX - gamma-glutamyl carboxylase, TADA1 - transcriptional adaptor 1, AARS - alanyl-trna synthetase, PNN - pinin, desmosome associated protein, GRHL2 - grainyhead-like 2 (drosophila), ABCF1 - atp-bin…
GO:0048518	positive regulation of biological process	3.56e-08	1.08e-05	1.08	4577	1670	2963	1165	[BMP2K - bmp2 inducible kinase, SYMPK - symplekin, LRRC16A - leucine rich repeat containing 16a, GDI1 - gdp dissociation inhibitor 1, ABAT - 4-aminobutyrate aminotransferase, GRHL2 - grainyhead-like 2 (drosophila), PLXNB1 - plexin b1, SERINC3 - serine incorporator 3, ABR - active bcr-related, CNOT11 - ccr4-not transcription complex, subunit 11, KAT2A - k(lysine) acetyltransferase 2a, ASIC2 - acid…
GO:0046907	intracellular transport	4.09e-08	1.21e-05	1.17	4577	490	2963	370	[AFG3L2 - afg3 atpase family member 3-like 2 (s. cerevisiae), TOB1 - transducer of erbb2, 1, TBC1D20 - tbc1 domain family, member 20, NCBP1 - nuclear cap binding protein subunit 1, 80kda, SPTAN1 - spectrin, alpha, non-erythrocytic 1, KIFAP3 - kinesin-associated protein 3, KDELR1 - kdel (lys-asp-glu-leu) endoplasmic reticulum protein retention receptor 1, SYMPK - symplekin, TTC26 - tetratricopepti…
GO:0031329	regulation of cellular catabolic process	5.34e-08	1.53e-05	1.22	4577	285	2963	225	[TOB1 - transducer of erbb2, 1, DAPK2 - death-associated protein kinase 2, METTL14 - methyltransferase like 14, EP300 - e1a binding protein p300, RNF14 - ring finger protein 14, RDX - radixin, UPF1 - upf1 regulator of nonsense transcripts homolog (yeast), KAT2A - k(lysine) acetyltransferase 2a, RAB3GAP1 - rab3 gtpase activating protein subunit 1 (catalytic), ZDHHC8 - zinc finger, dhhc-type contai…
GO:0015833	peptide transport	7.03e-08	1.97e-05	1.18	4577	424	2963	323	[TOB1 - transducer of erbb2, 1, KDELR1 - kdel (lys-asp-glu-leu) endoplasmic reticulum protein retention receptor 1, KIFAP3 - kinesin-associated protein 3, TTC26 - tetratricopeptide repeat domain 26, AP3M2 - adaptor-related protein complex 3, mu 2 subunit, SPIRE1 - spire actin nucleation factor 1, PDIA4 - protein disulfide isomerase family a, member 4, TRAK1 - trafficking protein, kinesin binding …
GO:0016050	vesicle organization	7.71e-08	2.1e-05	1.33	4577	122	2963	105	[TBC1D20 - tbc1 domain family, member 20, SNF8 - snf8, escrt-ii complex subunit, SEC13 - sec13 homolog (s. cerevisiae), SCFD1 - sec1 family domain containing 1, RFX2 - regulatory factor x, 2 (influences hla class ii expression), VPS37A - vacuolar protein sorting 37 homolog a (s. cerevisiae), C2CD5 - c2 calcium-dependent domain containing 5, CNIH - cornichon homolog (drosophila), AP3B1 - adaptor-r…
GO:0044265	cellular macromolecule catabolic process	9.49e-08	2.53e-05	1.24	4577	236	2963	189	[PSMD6 - proteasome (prosome, macropain) 26s subunit, non-atpase, 6, SEL1L - sel-1 suppressor of lin-12-like (c. elegans), NCBP1 - nuclear cap binding protein subunit 1, 80kda, RMND5A - required for meiotic nuclear division 5 homolog a (s. cerevisiae), EXOSC10 - exosome component 10, KCTD10 - potassium channel tetramerization domain containing 10, PARN - poly(a)-specific ribonuclease, KCTD5 - pot…
GO:0042886	amide transport	1.15e-07	2.91e-05	1.17	4577	428	2963	325	[TOB1 - transducer of erbb2, 1, KDELR1 - kdel (lys-asp-glu-leu) endoplasmic reticulum protein retention receptor 1, KIFAP3 - kinesin-associated protein 3, TTC26 - tetratricopeptide repeat domain 26, AP3M2 - adaptor-related protein complex 3, mu 2 subunit, SPIRE1 - spire actin nucleation factor 1, PDIA4 - protein disulfide isomerase family a, member 4, TRAK1 - trafficking protein, kinesin binding …
GO:0009056	catabolic process	1.14e-07	2.96e-05	1.16	4577	494	2963	371	[NCBP1 - nuclear cap binding protein subunit 1, 80kda, EXOSC10 - exosome component 10, MCCC1 - methylcrotonoyl-coa carboxylase 1 (alpha), HSD17B4 - hydroxysteroid (17-beta) dehydrogenase 4, BCKDK - branched chain ketoacid dehydrogenase kinase, ABAT - 4-aminobutyrate aminotransferase, VPS37A - vacuolar protein sorting 37 homolog a (s. cerevisiae), MARCH6 - membrane-associated ring finger (c3hc4) 6…
GO:0007165	signal transduction	1.23e-07	3.06e-05	1.09	4577	1191	2963	844	[GFPT1 - glutamine--fructose-6-phosphate transaminase 1, AGAP3 - arfgap with gtpase domain, ankyrin repeat and ph domain 3, TTC26 - tetratricopeptide repeat domain 26, GDI1 - gdp dissociation inhibitor 1, GEM - gtp binding protein overexpressed in skeletal muscle, PLXNB1 - plexin b1, ABR - active bcr-related, CNOT11 - ccr4-not transcription complex, subunit 11, ASIC2 - acid-sensing (proton-gated)…
GO:0043161	proteasome-mediated ubiquitin-dependent protein catabolic process	1.33e-07	3.23e-05	1.33	4577	116	2963	100	[PSMD6 - proteasome (prosome, macropain) 26s subunit, non-atpase, 6, SEL1L - sel-1 suppressor of lin-12-like (c. elegans), RMND5A - required for meiotic nuclear division 5 homolog a (s. cerevisiae), KCTD10 - potassium channel tetramerization domain containing 10, KCTD5 - potassium channel tetramerization domain containing 5, CDC27 - cell division cycle 27, WWTR1 - ww domain containing transcripti…
GO:0045184	establishment of protein localization	1.61e-07	3.82e-05	1.17	4577	446	2963	337	[TOB1 - transducer of erbb2, 1, KDELR1 - kdel (lys-asp-glu-leu) endoplasmic reticulum protein retention receptor 1, KIFAP3 - kinesin-associated protein 3, TTC26 - tetratricopeptide repeat domain 26, AP3M2 - adaptor-related protein complex 3, mu 2 subunit, SPIRE1 - spire actin nucleation factor 1, PDIA4 - protein disulfide isomerase family a, member 4, TRAK1 - trafficking protein, kinesin binding …
GO:0000209	protein polyubiquitination	1.7e-07	3.94e-05	1.34	4577	111	2963	96	[PSMD6 - proteasome (prosome, macropain) 26s subunit, non-atpase, 6, KLHL42 - kelch-like family member 42, RNF34 - ring finger protein 34, e3 ubiquitin protein ligase, FBXW7 - f-box and wd repeat domain containing 7, e3 ubiquitin protein ligase, FBXO11 - f-box protein 11, CDC27 - cell division cycle 27, SPSB1 - spla/ryanodine receptor domain and socs box containing 1, ANKIB1 - ankyrin repeat and …
GO:0043632	modification-dependent macromolecule catabolic process	2.21e-07	5.02e-05	1.28	4577	162	2963	134	[PSMD6 - proteasome (prosome, macropain) 26s subunit, non-atpase, 6, SEL1L - sel-1 suppressor of lin-12-like (c. elegans), RMND5A - required for meiotic nuclear division 5 homolog a (s. cerevisiae), EXOSC10 - exosome component 10, KCTD10 - potassium channel tetramerization domain containing 10, KCTD5 - potassium channel tetramerization domain containing 5, CDC27 - cell division cycle 27, VPS37A -…
GO:0010498	proteasomal protein catabolic process	2.63e-07	5.85e-05	1.31	4577	126	2963	107	[PSMD6 - proteasome (prosome, macropain) 26s subunit, non-atpase, 6, SEL1L - sel-1 suppressor of lin-12-like (c. elegans), RMND5A - required for meiotic nuclear division 5 homolog a (s. cerevisiae), KCTD10 - potassium channel tetramerization domain containing 10, ENC1 - ectodermal-neural cortex 1 (with btb domain), KCTD5 - potassium channel tetramerization domain containing 5, CDC27 - cell divisi…
GO:0030001	metal ion transport	2.8e-07	6.11e-05	1.26	4577	180	2963	147	[AFG3L2 - afg3 atpase family member 3-like 2 (s. cerevisiae), SLC4A10 - solute carrier family 4, sodium bicarbonate transporter, member 10, SLC39A11 - solute carrier family 39, member 11, KCNAB2 - potassium voltage-gated channel, shaker-related subfamily, beta member 2, DENND5A - denn/madd domain containing 5a, JPH3 - junctophilin 3, ANXA6 - annexin a6, SLC41A1 - solute carrier family 41 (magnesi…
GO:0019941	modification-dependent protein catabolic process	2.99e-07	6.27e-05	1.28	4577	157	2963	130	[PSMD6 - proteasome (prosome, macropain) 26s subunit, non-atpase, 6, SEL1L - sel-1 suppressor of lin-12-like (c. elegans), RMND5A - required for meiotic nuclear division 5 homolog a (s. cerevisiae), KCTD10 - potassium channel tetramerization domain containing 10, KCTD5 - potassium channel tetramerization domain containing 5, VPS37A - vacuolar protein sorting 37 homolog a (s. cerevisiae), CDC27 - …
GO:0033036	macromolecule localization	3.1e-07	6.38e-05	1.14	4577	620	2963	456	[EXOSC10 - exosome component 10, KDELR1 - kdel (lys-asp-glu-leu) endoplasmic reticulum protein retention receptor 1, TTC26 - tetratricopeptide repeat domain 26, AP3M2 - adaptor-related protein complex 3, mu 2 subunit, PDIA4 - protein disulfide isomerase family a, member 4, GDI1 - gdp dissociation inhibitor 1, CORO1C - coronin, actin binding protein, 1c, VPS37A - vacuolar protein sorting 37 homolo…
GO:0006511	ubiquitin-dependent protein catabolic process	2.99e-07	6.39e-05	1.28	4577	157	2963	130	[PSMD6 - proteasome (prosome, macropain) 26s subunit, non-atpase, 6, SEL1L - sel-1 suppressor of lin-12-like (c. elegans), RMND5A - required for meiotic nuclear division 5 homolog a (s. cerevisiae), KCTD10 - potassium channel tetramerization domain containing 10, KCTD5 - potassium channel tetramerization domain containing 5, CDC27 - cell division cycle 27, VPS37A - vacuolar protein sorting 37 hom…
GO:0016192	vesicle-mediated transport	3.58e-07	7.24e-05	1.15	4577	497	2963	371	[TBC1D20 - tbc1 domain family, member 20, SPTAN1 - spectrin, alpha, non-erythrocytic 1, KDELR1 - kdel (lys-asp-glu-leu) endoplasmic reticulum protein retention receptor 1, KIFAP3 - kinesin-associated protein 3, AP3M2 - adaptor-related protein complex 3, mu 2 subunit, SPIRE1 - spire actin nucleation factor 1, TRAK1 - trafficking protein, kinesin binding 1, LRRC16A - leucine rich repeat containing …
GO:0034220	ion transmembrane transport	3.89e-07	7.72e-05	1.23	4577	219	2963	175	[AFG3L2 - afg3 atpase family member 3-like 2 (s. cerevisiae), SLC4A10 - solute carrier family 4, sodium bicarbonate transporter, member 10, SLC39A11 - solute carrier family 39, member 11, KCNAB2 - potassium voltage-gated channel, shaker-related subfamily, beta member 2, DENND5A - denn/madd domain containing 5a, JPH3 - junctophilin 3, ANXA6 - annexin a6, SLC41A1 - solute carrier family 41 (magnesi…
GO:0006811	ion transport	4.47e-07	8.71e-05	1.19	4577	330	2963	254	[AFG3L2 - afg3 atpase family member 3-like 2 (s. cerevisiae), SLC39A11 - solute carrier family 39, member 11, SERINC3 - serine incorporator 3, SPG7 - spastic paraplegia 7 (pure and complicated autosomal recessive), TRPC6 - transient receptor potential cation channel, subfamily c, member 6, SLC25A37 - solute carrier family 25 (mitochondrial iron transporter), member 37, BTK - bruton agammaglobulin…
GO:0051641	cellular localization	4.84e-07	9.26e-05	1.13	4577	696	2963	507	[AFG3L2 - afg3 atpase family member 3-like 2 (s. cerevisiae), SPTAN1 - spectrin, alpha, non-erythrocytic 1, EXOSC10 - exosome component 10, SYMPK - symplekin, KDELR1 - kdel (lys-asp-glu-leu) endoplasmic reticulum protein retention receptor 1, TTC26 - tetratricopeptide repeat domain 26, AP3M2 - adaptor-related protein complex 3, mu 2 subunit, STARD3 - star-related lipid transfer (start) domain con…
GO:0065008	regulation of biological quality	5.4e-07	0.000102	1.1	4577	949	2963	678	[AFG3L2 - afg3 atpase family member 3-like 2 (s. cerevisiae), ZMYND8 - zinc finger, mynd-type containing 8, SPTAN1 - spectrin, alpha, non-erythrocytic 1, EXOSC10 - exosome component 10, TMTC2 - transmembrane and tetratricopeptide repeat containing 2, KDELR1 - kdel (lys-asp-glu-leu) endoplasmic reticulum protein retention receptor 1, GGCX - gamma-glutamyl carboxylase, NCOA5 - nuclear receptor coac…
GO:0098660	inorganic ion transmembrane transport	5.53e-07	0.000102	1.27	4577	166	2963	136	[AFG3L2 - afg3 atpase family member 3-like 2 (s. cerevisiae), SLC4A10 - solute carrier family 4, sodium bicarbonate transporter, member 10, SLC39A11 - solute carrier family 39, member 11, KCNAB2 - potassium voltage-gated channel, shaker-related subfamily, beta member 2, DENND5A - denn/madd domain containing 5a, JPH3 - junctophilin 3, SLC41A1 - solute carrier family 41 (magnesium transporter), mem…
GO:0060627	regulation of vesicle-mediated transport	6.49e-07	0.000118	1.27	4577	154	2963	127	[BMP2K - bmp2 inducible kinase, TBC1D20 - tbc1 domain family, member 20, SNF8 - snf8, escrt-ii complex subunit, SCFD1 - sec1 family domain containing 1, TBC1D15 - tbc1 domain family, member 15, BRAF - v-raf murine sarcoma viral oncogene homolog b, RAB8B - rab8b, member ras oncogene family, STXBP5 - syntaxin binding protein 5 (tomosyn), NRP1 - neuropilin 1, RABGAP1 - rab gtpase activating protein …
GO:0016310	phosphorylation	6.89e-07	0.000123	1.17	4577	408	2963	308	[CCNK - cyclin k, BMP2K - bmp2 inducible kinase, SPTAN1 - spectrin, alpha, non-erythrocytic 1, DAPK2 - death-associated protein kinase 2, LIMK1 - lim domain kinase 1, BCKDK - branched chain ketoacid dehydrogenase kinase, BRAF - v-raf murine sarcoma viral oncogene homolog b, PAK4 - p21 protein (cdc42/rac)-activated kinase 4, BTK - bruton agammaglobulinemia tyrosine kinase, PANK2 - pantothenate kin…
GO:0055085	transmembrane transport	8.47e-07	0.000149	1.2	4577	296	2963	229	[AFG3L2 - afg3 atpase family member 3-like 2 (s. cerevisiae), SLC39A11 - solute carrier family 39, member 11, ABCF1 - atp-binding cassette, sub-family f (gcn20), member 1, ABCB7 - atp-binding cassette, sub-family b (mdr/tap), member 7, SPG7 - spastic paraplegia 7 (pure and complicated autosomal recessive), TRPC6 - transient receptor potential cation channel, subfamily c, member 6, SLC25A37 - solu…
GO:0008104	protein localization	1.01e-06	0.000175	1.13	4577	609	2963	446	[KDELR1 - kdel (lys-asp-glu-leu) endoplasmic reticulum protein retention receptor 1, TTC26 - tetratricopeptide repeat domain 26, AP3M2 - adaptor-related protein complex 3, mu 2 subunit, PDIA4 - protein disulfide isomerase family a, member 4, GDI1 - gdp dissociation inhibitor 1, VPS37A - vacuolar protein sorting 37 homolog a (s. cerevisiae), CORO1C - coronin, actin binding protein, 1c, RABGAP1 - r…
GO:0051173	positive regulation of nitrogen compound metabolic process	1.22e-06	0.000208	1.1	4577	906	2963	647	[PCGF5 - polycomb group ring finger 5, SYMPK - symplekin, ABAT - 4-aminobutyrate aminotransferase, PATZ1 - poz (btb) and at hook containing zinc finger 1, METTL14 - methyltransferase like 14, GRHL2 - grainyhead-like 2 (drosophila), NCOR2 - nuclear receptor corepressor 2, RNF14 - ring finger protein 14, SPI1 - spleen focus forming virus (sffv) proviral integration oncogene, KAT2A - k(lysine) acety…
GO:0042221	response to chemical	1.28e-06	0.000214	1.12	4577	736	2963	532	[LIG4 - ligase iv, dna, atp-dependent, GDI1 - gdp dissociation inhibitor 1, ABAT - 4-aminobutyrate aminotransferase, GATSL3 - gats protein-like 3, ABR - active bcr-related, SPI1 - spleen focus forming virus (sffv) proviral integration oncogene, SPARC - secreted protein, acidic, cysteine-rich (osteonectin), KAT2A - k(lysine) acetyltransferase 2a, ACAT1 - acetyl-coa acetyltransferase 1, ACO1 - acon…
GO:0010243	response to organonitrogen compound	1.41e-06	0.00023	1.21	4577	252	2963	197	[BRAF - v-raf murine sarcoma viral oncogene homolog b, GATSL3 - gats protein-like 3, SCAP - srebf chaperone, IQGAP1 - iq motif containing gtpase activating protein 1, MARCH6 - membrane-associated ring finger (c3hc4) 6, e3 ubiquitin protein ligase, SPARC - secreted protein, acidic, cysteine-rich (osteonectin), DERL1 - derlin 1, KLF5 - kruppel-like factor 5 (intestinal), SYVN1 - synovial apoptosis …
GO:0048193	Golgi vesicle transport	1.4e-06	0.000231	1.3	4577	124	2963	104	[TBC1D20 - tbc1 domain family, member 20, SPTAN1 - spectrin, alpha, non-erythrocytic 1, KIFAP3 - kinesin-associated protein 3, KDELR1 - kdel (lys-asp-glu-leu) endoplasmic reticulum protein retention receptor 1, SCFD1 - sec1 family domain containing 1, ERGIC1 - endoplasmic reticulum-golgi intermediate compartment (ergic) 1, COPB2 - coatomer protein complex, subunit beta 2 (beta prime), DCTN1 - dyn…
GO:0023014	signal transduction by protein phosphorylation	1.74e-06	0.000279	1.29	4577	131	2963	109	[PSMD6 - proteasome (prosome, macropain) 26s subunit, non-atpase, 6, SPTAN1 - spectrin, alpha, non-erythrocytic 1, BRAF - v-raf murine sarcoma viral oncogene homolog b, MAP3K10 - mitogen-activated protein kinase kinase kinase 10, RASGEF1A - rasgef domain family, member 1a, MAP2K4 - mitogen-activated protein kinase kinase 4, STK39 - serine threonine kinase 39, PAK4 - p21 protein (cdc42/rac)-activa…
GO:0031325	positive regulation of cellular metabolic process	1.95e-06	0.000308	1.1	4577	945	2963	672	[PCGF5 - polycomb group ring finger 5, SYMPK - symplekin, ABAT - 4-aminobutyrate aminotransferase, PATZ1 - poz (btb) and at hook containing zinc finger 1, METTL14 - methyltransferase like 14, GRHL2 - grainyhead-like 2 (drosophila), NCOR2 - nuclear receptor corepressor 2, RNF14 - ring finger protein 14, SPI1 - spleen focus forming virus (sffv) proviral integration oncogene, KAT2A - k(lysine) acety…
GO:1903311	regulation of mRNA metabolic process	1.97e-06	0.000308	1.35	4577	86	2963	75	[DHX9 - deah (asp-glu-ala-his) box helicase 9, TOB1 - transducer of erbb2, 1, PSMD6 - proteasome (prosome, macropain) 26s subunit, non-atpase, 6, NCBP1 - nuclear cap binding protein subunit 1, 80kda, PARN - poly(a)-specific ribonuclease, MBNL2 - muscleblind-like splicing regulator 2, MTOR - mechanistic target of rapamycin (serine/threonine kinase), SF3A1 - splicing factor 3a, subunit 1, 120kda, X…
GO:0031323	regulation of cellular metabolic process	2.47e-06	0.000379	1.06	4577	1738	2963	1197	[EXOSC10 - exosome component 10, SYMPK - symplekin, TADA1 - transcriptional adaptor 1, AARS - alanyl-trna synthetase, PNN - pinin, desmosome associated protein, CBX1 - chromobox homolog 1, ABAT - 4-aminobutyrate aminotransferase, GRHL2 - grainyhead-like 2 (drosophila), LZTR1 - leucine-zipper-like transcription regulator 1, CNOT11 - ccr4-not transcription complex, subunit 11, SUPT20H - suppressor …
GO:0034765	regulation of ion transmembrane transport	3.31e-06	0.000502	1.27	4577	140	2963	115	[OPRL1 - opiate receptor-like 1, KCNAB2 - potassium voltage-gated channel, shaker-related subfamily, beta member 2, GEM - gtp binding protein overexpressed in skeletal muscle, JPH3 - junctophilin 3, STK39 - serine threonine kinase 39, TRPC6 - transient receptor potential cation channel, subfamily c, member 6, TRPC1 - transient receptor potential cation channel, subfamily c, member 1, CHP1 - calci…
GO:0006886	intracellular protein transport	3.5e-06	0.000516	1.2	4577	251	2963	195	[TOB1 - transducer of erbb2, 1, KIFAP3 - kinesin-associated protein 3, KDELR1 - kdel (lys-asp-glu-leu) endoplasmic reticulum protein retention receptor 1, TTC26 - tetratricopeptide repeat domain 26, AP3M2 - adaptor-related protein complex 3, mu 2 subunit, TRAK1 - trafficking protein, kinesin binding 1, HES1 - hairy and enhancer of split 1, (drosophila), RABGAP1 - rab gtpase activating protein 1, …
GO:0032268	regulation of cellular protein metabolic process	3.46e-06	0.000517	1.11	4577	775	2963	556	[SYMPK - symplekin, AARS - alanyl-trna synthetase, LIMK1 - lim domain kinase 1, METTL14 - methyltransferase like 14, CORO1C - coronin, actin binding protein, 1c, PPP4R4 - protein phosphatase 4, regulatory subunit 4, NCOR2 - nuclear receptor corepressor 2, RNF14 - ring finger protein 14, CNOT11 - ccr4-not transcription complex, subunit 11, SPI1 - spleen focus forming virus (sffv) proviral integrat…
GO:0043543	protein acylation	3.71e-06	0.000526	1.41	4577	57	2963	52	[NMT1 - n-myristoyltransferase 1, EPC2 - enhancer of polycomb homolog 2 (drosophila), TADA1 - transcriptional adaptor 1, MCRS1 - microspherule protein 1, NAA40 - n(alpha)-acetyltransferase 40, natd catalytic subunit, homolog (s. cerevisiae), EP300 - e1a binding protein p300, SPI1 - spleen focus forming virus (sffv) proviral integration oncogene, NAA15 - n(alpha)-acetyltransferase 15, nata auxilia…
GO:1901698	response to nitrogen compound	3.63e-06	0.000529	1.19	4577	268	2963	207	[BRAF - v-raf murine sarcoma viral oncogene homolog b, GATSL3 - gats protein-like 3, SCAP - srebf chaperone, IQGAP1 - iq motif containing gtpase activating protein 1, MARCH6 - membrane-associated ring finger (c3hc4) 6, e3 ubiquitin protein ligase, SPARC - secreted protein, acidic, cysteine-rich (osteonectin), DERL1 - derlin 1, KLF5 - kruppel-like factor 5 (intestinal), SYVN1 - synovial apoptosis …
GO:1901575	organic substance catabolic process	3.69e-06	0.000529	1.15	4577	421	2963	314	[NCBP1 - nuclear cap binding protein subunit 1, 80kda, EXOSC10 - exosome component 10, MCCC1 - methylcrotonoyl-coa carboxylase 1 (alpha), HSD17B4 - hydroxysteroid (17-beta) dehydrogenase 4, BCKDK - branched chain ketoacid dehydrogenase kinase, ABAT - 4-aminobutyrate aminotransferase, VPS37A - vacuolar protein sorting 37 homolog a (s. cerevisiae), MARCH6 - membrane-associated ring finger (c3hc4) 6…
GO:0051171	regulation of nitrogen compound metabolic process	4e-06	0.000559	1.07	4577	1649	2963	1137	[EXOSC10 - exosome component 10, SYMPK - symplekin, TADA1 - transcriptional adaptor 1, AARS - alanyl-trna synthetase, PNN - pinin, desmosome associated protein, CBX1 - chromobox homolog 1, ABAT - 4-aminobutyrate aminotransferase, GRHL2 - grainyhead-like 2 (drosophila), LZTR1 - leucine-zipper-like transcription regulator 1, CNOT11 - ccr4-not transcription complex, subunit 11, SUPT20H - suppressor …
GO:0010604	positive regulation of macromolecule metabolic process	4.63e-06	0.00064	1.09	4577	947	2963	671	[PCGF5 - polycomb group ring finger 5, SYMPK - symplekin, PATZ1 - poz (btb) and at hook containing zinc finger 1, METTL14 - methyltransferase like 14, GRHL2 - grainyhead-like 2 (drosophila), NCOR2 - nuclear receptor corepressor 2, RNF14 - ring finger protein 14, SPI1 - spleen focus forming virus (sffv) proviral integration oncogene, KAT2A - k(lysine) acetyltransferase 2a, TRAF4 - tnf receptor-ass…
GO:0070887	cellular response to chemical stimulus	4.69e-06	0.00064	1.14	4577	468	2963	346	[LIG4 - ligase iv, dna, atp-dependent, BRAF - v-raf murine sarcoma viral oncogene homolog b, RFX2 - regulatory factor x, 2 (influences hla class ii expression), GATSL3 - gats protein-like 3, NRP1 - neuropilin 1, IQGAP1 - iq motif containing gtpase activating protein 1, EPAS1 - endothelial pas domain protein 1, SPI1 - spleen focus forming virus (sffv) proviral integration oncogene, TRPC6 - transie…
GO:0098662	inorganic cation transmembrane transport	4.84e-06	0.000652	1.26	4577	146	2963	119	[AFG3L2 - afg3 atpase family member 3-like 2 (s. cerevisiae), SLC4A10 - solute carrier family 4, sodium bicarbonate transporter, member 10, SLC39A11 - solute carrier family 39, member 11, KCNAB2 - potassium voltage-gated channel, shaker-related subfamily, beta member 2, DENND5A - denn/madd domain containing 5a, JPH3 - junctophilin 3, SLC41A1 - solute carrier family 41 (magnesium transporter), mem…
GO:0007610	behavior	4.99e-06	0.000664	1.25	4577	157	2963	127	[OPRL1 - opiate receptor-like 1, SLC4A10 - solute carrier family 4, sodium bicarbonate transporter, member 10, ITGA8 - integrin, alpha 8, BRAF - v-raf murine sarcoma viral oncogene homolog b, ABAT - 4-aminobutyrate aminotransferase, ATP8A2 - atpase, aminophospholipid transporter, class i, type 8a, member 2, PBX3 - pre-b-cell leukemia homeobox 3, JPH3 - junctophilin 3, PSEN1 - presenilin 1, APBA1 …
GO:0019222	regulation of metabolic process	5.09e-06	0.00067	1.06	4577	1844	2963	1264	[GFPT1 - glutamine--fructose-6-phosphate transaminase 1, EXOSC10 - exosome component 10, SYMPK - symplekin, TADA1 - transcriptional adaptor 1, AARS - alanyl-trna synthetase, PNN - pinin, desmosome associated protein, ABAT - 4-aminobutyrate aminotransferase, CBX1 - chromobox homolog 1, GRHL2 - grainyhead-like 2 (drosophila), LZTR1 - leucine-zipper-like transcription regulator 1, CNOT11 - ccr4-not …
GO:0016569	covalent chromatin modification	5.24e-06	0.00068	1.22	4577	193	2963	153	[ZMYND8 - zinc finger, mynd-type containing 8, SMARCAD1 - swi/snf-related, matrix-associated actin-dependent regulator of chromatin, subfamily a, containing dead/h box 1, PCGF5 - polycomb group ring finger 5, VPS72 - vacuolar protein sorting 72 homolog (s. cerevisiae), TADA1 - transcriptional adaptor 1, SETDB1 - set domain, bifurcated 1, WHSC1L1 - wolf-hirschhorn syndrome candidate 1-like 1, SIN3…
GO:0006468	protein phosphorylation	5.61e-06	0.00072	1.17	4577	343	2963	259	[CCNK - cyclin k, BMP2K - bmp2 inducible kinase, SPTAN1 - spectrin, alpha, non-erythrocytic 1, DAPK2 - death-associated protein kinase 2, LIMK1 - lim domain kinase 1, BCKDK - branched chain ketoacid dehydrogenase kinase, BRAF - v-raf murine sarcoma viral oncogene homolog b, PAK4 - p21 protein (cdc42/rac)-activated kinase 4, BTK - bruton agammaglobulinemia tyrosine kinase, NRG2 - neuregulin 2, SOX…
GO:0051246	regulation of protein metabolic process	5.89e-06	0.000747	1.1	4577	820	2963	585	[SYMPK - symplekin, AARS - alanyl-trna synthetase, LIMK1 - lim domain kinase 1, METTL14 - methyltransferase like 14, CORO1C - coronin, actin binding protein, 1c, NCOR2 - nuclear receptor corepressor 2, PPP4R4 - protein phosphatase 4, regulatory subunit 4, RNF14 - ring finger protein 14, CNOT11 - ccr4-not transcription complex, subunit 11, SPI1 - spleen focus forming virus (sffv) proviral integrat…
GO:0006325	chromatin organization	6.07e-06	0.000762	1.21	4577	224	2963	175	[ZMYND8 - zinc finger, mynd-type containing 8, SMARCAD1 - swi/snf-related, matrix-associated actin-dependent regulator of chromatin, subfamily a, containing dead/h box 1, PCGF5 - polycomb group ring finger 5, VPS72 - vacuolar protein sorting 72 homolog (s. cerevisiae), TADA1 - transcriptional adaptor 1, SETDB1 - set domain, bifurcated 1, WHSC1L1 - wolf-hirschhorn syndrome candidate 1-like 1, SIN3…
GO:0009893	positive regulation of metabolic process	6.24e-06	0.000774	1.09	4577	1005	2963	709	[PCGF5 - polycomb group ring finger 5, SYMPK - symplekin, ABAT - 4-aminobutyrate aminotransferase, PATZ1 - poz (btb) and at hook containing zinc finger 1, METTL14 - methyltransferase like 14, GRHL2 - grainyhead-like 2 (drosophila), NCOR2 - nuclear receptor corepressor 2, RNF14 - ring finger protein 14, SPI1 - spleen focus forming virus (sffv) proviral integration oncogene, KAT2A - k(lysine) acety…
GO:0009057	macromolecule catabolic process	6.44e-06	0.00079	1.18	4577	282	2963	216	[NCBP1 - nuclear cap binding protein subunit 1, 80kda, EXOSC10 - exosome component 10, VPS37A - vacuolar protein sorting 37 homolog a (s. cerevisiae), MARCH6 - membrane-associated ring finger (c3hc4) 6, e3 ubiquitin protein ligase, FBXO45 - f-box protein 45, CNOT11 - ccr4-not transcription complex, subunit 11, UPF1 - upf1 regulator of nonsense transcripts homolog (yeast), DERL1 - derlin 1, BACE1 …
GO:1901565	organonitrogen compound catabolic process	6.61e-06	0.000801	1.2	4577	234	2963	182	[PSMD6 - proteasome (prosome, macropain) 26s subunit, non-atpase, 6, SEL1L - sel-1 suppressor of lin-12-like (c. elegans), RMND5A - required for meiotic nuclear division 5 homolog a (s. cerevisiae), MCCC1 - methylcrotonoyl-coa carboxylase 1 (alpha), KCTD10 - potassium channel tetramerization domain containing 10, BCKDK - branched chain ketoacid dehydrogenase kinase, ABAT - 4-aminobutyrate aminotr…
GO:0000375	RNA splicing, via transesterification reactions	6.72e-06	0.000806	1.34	4577	82	2963	71	[DHX9 - deah (asp-glu-ala-his) box helicase 9, HNRNPUL1 - heterogeneous nuclear ribonucleoprotein u-like 1, DHX8 - deah (asp-glu-ala-his) box polypeptide 8, CSTF1 - cleavage stimulation factor, 3' pre-rna, subunit 1, 50kda, NCBP1 - nuclear cap binding protein subunit 1, 80kda, DBR1 - debranching rna lariats 1, SYMPK - symplekin, PRPF3 - pre-mrna processing factor 3, RBM15 - rna binding motif prot…
GO:0050767	regulation of neurogenesis	7.49e-06	0.000888	1.19	4577	254	2963	196	[ZMYND8 - zinc finger, mynd-type containing 8, ITM2C - integral membrane protein 2c, CASZ1 - castor zinc finger 1, LIG4 - ligase iv, dna, atp-dependent, TRAK1 - trafficking protein, kinesin binding 1, BRAF - v-raf murine sarcoma viral oncogene homolog b, GDI1 - gdp dissociation inhibitor 1, LIMK1 - lim domain kinase 1, LINGO1 - leucine rich repeat and ig domain containing 1, HES1 - hairy and enha…
GO:0051603	proteolysis involved in cellular protein catabolic process	7.87e-06	0.000924	1.23	4577	184	2963	146	[PSMD6 - proteasome (prosome, macropain) 26s subunit, non-atpase, 6, SEL1L - sel-1 suppressor of lin-12-like (c. elegans), RMND5A - required for meiotic nuclear division 5 homolog a (s. cerevisiae), KCTD10 - potassium channel tetramerization domain containing 10, ENC1 - ectodermal-neural cortex 1 (with btb domain), KCTD5 - potassium channel tetramerization domain containing 5, CDC27 - cell divisi…
GO:0000398	mRNA splicing, via spliceosome	9.09e-06	0.00102	1.33	4577	81	2963	70	[DHX9 - deah (asp-glu-ala-his) box helicase 9, HNRNPUL1 - heterogeneous nuclear ribonucleoprotein u-like 1, DHX8 - deah (asp-glu-ala-his) box polypeptide 8, CSTF1 - cleavage stimulation factor, 3' pre-rna, subunit 1, 50kda, NCBP1 - nuclear cap binding protein subunit 1, 80kda, DBR1 - debranching rna lariats 1, SYMPK - symplekin, PRPF3 - pre-mrna processing factor 3, RBM15 - rna binding motif prot…
GO:0000377	RNA splicing, via transesterification reactions with bulged adenosine as nucleophile	9.09e-06	0.00103	1.33	4577	81	2963	70	[DHX9 - deah (asp-glu-ala-his) box helicase 9, HNRNPUL1 - heterogeneous nuclear ribonucleoprotein u-like 1, DHX8 - deah (asp-glu-ala-his) box polypeptide 8, CSTF1 - cleavage stimulation factor, 3' pre-rna, subunit 1, 50kda, NCBP1 - nuclear cap binding protein subunit 1, 80kda, DBR1 - debranching rna lariats 1, SYMPK - symplekin, PRPF3 - pre-mrna processing factor 3, RBM15 - rna binding motif prot…
GO:0016071	mRNA metabolic process	9.08e-06	0.00104	1.22	4577	194	2963	153	[DHX9 - deah (asp-glu-ala-his) box helicase 9, DHX8 - deah (asp-glu-ala-his) box polypeptide 8, NCBP1 - nuclear cap binding protein subunit 1, 80kda, EXOSC10 - exosome component 10, SYMPK - symplekin, PARN - poly(a)-specific ribonuclease, MBNL2 - muscleblind-like splicing regulator 2, RBM15 - rna binding motif protein 15, DHX40 - deah (asp-glu-ala-his) box polypeptide 40, PNN - pinin, desmosome a…
GO:0060341	regulation of cellular localization	9.01e-06	0.00105	1.17	4577	327	2963	247	[ZMYND8 - zinc finger, mynd-type containing 8, TBC1D20 - tbc1 domain family, member 20, BRAF - v-raf murine sarcoma viral oncogene homolog b, GDI1 - gdp dissociation inhibitor 1, STARD7 - star-related lipid transfer (start) domain containing 7, HES1 - hairy and enhancer of split 1, (drosophila), IQGAP1 - iq motif containing gtpase activating protein 1, RDX - radixin, REEP2 - receptor accessory pr…
GO:0034762	regulation of transmembrane transport	1e-05	0.00112	1.25	4577	143	2963	116	[OPRL1 - opiate receptor-like 1, KCNAB2 - potassium voltage-gated channel, shaker-related subfamily, beta member 2, GEM - gtp binding protein overexpressed in skeletal muscle, JPH3 - junctophilin 3, STK39 - serine threonine kinase 39, TRPC6 - transient receptor potential cation channel, subfamily c, member 6, TRPC1 - transient receptor potential cation channel, subfamily c, member 1, CHP1 - calci…
GO:0071495	cellular response to endogenous stimulus	1.01e-05	0.00112	1.2	4577	218	2963	170	[ZEB1 - zinc finger e-box binding homeobox 1, BRAF - v-raf murine sarcoma viral oncogene homolog b, SIN3A - sin3 transcription regulator family member a, GATSL3 - gats protein-like 3, DDC - dopa decarboxylase (aromatic l-amino acid decarboxylase), IQGAP1 - iq motif containing gtpase activating protein 1, C2CD5 - c2 calcium-dependent domain containing 5, PSEN1 - presenilin 1, RDX - radixin, SIK2 -…
GO:0030163	protein catabolic process	1.09e-05	0.00119	1.25	4577	150	2963	121	[PSMD6 - proteasome (prosome, macropain) 26s subunit, non-atpase, 6, SEL1L - sel-1 suppressor of lin-12-like (c. elegans), RMND5A - required for meiotic nuclear division 5 homolog a (s. cerevisiae), KCTD10 - potassium channel tetramerization domain containing 10, ENC1 - ectodermal-neural cortex 1 (with btb domain), KCTD5 - potassium channel tetramerization domain containing 5, CDC27 - cell divisi…
GO:0060255	regulation of macromolecule metabolic process	1.12e-05	0.00119	1.06	4577	1700	2963	1167	[GFPT1 - glutamine--fructose-6-phosphate transaminase 1, EXOSC10 - exosome component 10, SYMPK - symplekin, TADA1 - transcriptional adaptor 1, AARS - alanyl-trna synthetase, PNN - pinin, desmosome associated protein, CBX1 - chromobox homolog 1, GRHL2 - grainyhead-like 2 (drosophila), LZTR1 - leucine-zipper-like transcription regulator 1, CNOT11 - ccr4-not transcription complex, subunit 11, SUPT20…
GO:0006473	protein acetylation	1.11e-05	0.0012	1.44	4577	44	2963	41	[ACTL6A - actin-like 6a, BRPF1 - bromodomain and phd finger containing, 1, EPC2 - enhancer of polycomb homolog 2 (drosophila), TAF5 - taf5 rna polymerase ii, tata box binding protein (tbp)-associated factor, 100kda, TADA1 - transcriptional adaptor 1, MCRS1 - microspherule protein 1, CHD5 - chromodomain helicase dna binding protein 5, EPC1 - enhancer of polycomb homolog 1 (drosophila), NAA40 - n(a…
GO:0080090	regulation of primary metabolic process	1.14e-05	0.00121	1.06	4577	1694	2963	1163	[EXOSC10 - exosome component 10, SYMPK - symplekin, TADA1 - transcriptional adaptor 1, AARS - alanyl-trna synthetase, PNN - pinin, desmosome associated protein, ABAT - 4-aminobutyrate aminotransferase, CBX1 - chromobox homolog 1, GRHL2 - grainyhead-like 2 (drosophila), LZTR1 - leucine-zipper-like transcription regulator 1, CNOT11 - ccr4-not transcription complex, subunit 11, SUPT20H - suppressor …
GO:0006816	calcium ion transport	1.15e-05	0.00121	1.34	4577	76	2963	66	[AFG3L2 - afg3 atpase family member 3-like 2 (s. cerevisiae), ATP2B1 - atpase, ca++ transporting, plasma membrane 1, ATP2B2 - atpase, ca++ transporting, plasma membrane 2, CHRNB2 - cholinergic receptor, nicotinic, beta 2 (neuronal), ATP2A2 - atpase, ca++ transporting, cardiac muscle, slow twitch 2, SLC8A3 - solute carrier family 8 (sodium/calcium exchanger), member 3, CAMK2G - calcium/calmodulin-…
GO:0070838	divalent metal ion transport	1.33e-05	0.00138	1.31	4577	92	2963	78	[AFG3L2 - afg3 atpase family member 3-like 2 (s. cerevisiae), SLC39A11 - solute carrier family 39, member 11, ATP2B1 - atpase, ca++ transporting, plasma membrane 1, ATP2B2 - atpase, ca++ transporting, plasma membrane 2, SLC39A13 - solute carrier family 39 (zinc transporter), member 13, CHRNB2 - cholinergic receptor, nicotinic, beta 2 (neuronal), ATP2A2 - atpase, ca++ transporting, cardiac muscle,…
GO:0006082	organic acid metabolic process	1.43e-05	0.00148	1.19	4577	254	2963	195	[GFPT1 - glutamine--fructose-6-phosphate transaminase 1, MCCC1 - methylcrotonoyl-coa carboxylase 1 (alpha), HSD17B4 - hydroxysteroid (17-beta) dehydrogenase 4, SCD5 - stearoyl-coa desaturase 5, SUCLG2 - succinate-coa ligase, gdp-forming, beta subunit, AARS - alanyl-trna synthetase, BCKDK - branched chain ketoacid dehydrogenase kinase, LRRC16A - leucine rich repeat containing 16a, SUCLG1 - succina…
GO:0051716	cellular response to stimulus	1.64e-05	0.00162	1.1	4577	836	2963	593	[GFPT1 - glutamine--fructose-6-phosphate transaminase 1, LIG4 - ligase iv, dna, atp-dependent, PDIA4 - protein disulfide isomerase family a, member 4, GATSL3 - gats protein-like 3, CNOT11 - ccr4-not transcription complex, subunit 11, SPI1 - spleen focus forming virus (sffv) proviral integration oncogene, SPARC - secreted protein, acidic, cysteine-rich (osteonectin), KAT2A - k(lysine) acetyltransf…
GO:0010033	response to organic substance	1.6e-05	0.00163	1.12	4577	580	2963	420	[ABAT - 4-aminobutyrate aminotransferase, GATSL3 - gats protein-like 3, ABR - active bcr-related, SPI1 - spleen focus forming virus (sffv) proviral integration oncogene, SPARC - secreted protein, acidic, cysteine-rich (osteonectin), KAT2A - k(lysine) acetyltransferase 2a, ACAT1 - acetyl-coa acetyltransferase 1, SOX10 - sry (sex determining region y)-box 10, SYVN1 - synovial apoptosis inhibitor 1,…
GO:0001505	regulation of neurotransmitter levels	1.62e-05	0.00163	1.44	4577	43	2963	40	[SYN1 - synapsin i, ATP2A2 - atpase, ca++ transporting, cardiac muscle, slow twitch 2, DNAJC5 - dnaj (hsp40) homolog, subfamily c, member 5, ATP1A2 - atpase, na+/k+ transporting, alpha 2 polypeptide, BRAF - v-raf murine sarcoma viral oncogene homolog b, SYT1 - synaptotagmin i, ABAT - 4-aminobutyrate aminotransferase, CAMK2A - calcium/calmodulin-dependent protein kinase ii alpha, SYT4 - synaptotag…
GO:0051960	regulation of nervous system development	1.63e-05	0.00163	1.17	4577	287	2963	218	[ZMYND8 - zinc finger, mynd-type containing 8, ITM2C - integral membrane protein 2c, CASZ1 - castor zinc finger 1, LIG4 - ligase iv, dna, atp-dependent, RFX4 - regulatory factor x, 4 (influences hla class ii expression), TRAK1 - trafficking protein, kinesin binding 1, GDI1 - gdp dissociation inhibitor 1, BRAF - v-raf murine sarcoma viral oncogene homolog b, LIMK1 - lim domain kinase 1, LINGO1 - l…
GO:0006820	anion transport	1.67e-05	0.00164	1.26	4577	126	2963	103	[SLC4A10 - solute carrier family 4, sodium bicarbonate transporter, member 10, ATP8A2 - atpase, aminophospholipid transporter, class i, type 8a, member 2, SERINC3 - serine incorporator 3, PPFIA2 - protein tyrosine phosphatase, receptor type, f polypeptide (ptprf), interacting protein (liprin), alpha 2, PPFIA1 - protein tyrosine phosphatase, receptor type, f polypeptide (ptprf), interacting protei…
GO:0035556	intracellular signal transduction	1.73e-05	0.00167	1.13	4577	507	2963	370	[MAPKAP1 - mitogen-activated protein kinase associated protein 1, SPTAN1 - spectrin, alpha, non-erythrocytic 1, DAPK2 - death-associated protein kinase 2, BRAF - v-raf murine sarcoma viral oncogene homolog b, LIMK1 - lim domain kinase 1, GDI1 - gdp dissociation inhibitor 1, PLXNB1 - plexin b1, EP300 - e1a binding protein p300, ABR - active bcr-related, RDX - radixin, PAK4 - p21 protein (cdc42/rac…
GO:0043436	oxoacid metabolic process	1.73e-05	0.00168	1.18	4577	253	2963	194	[GFPT1 - glutamine--fructose-6-phosphate transaminase 1, MCCC1 - methylcrotonoyl-coa carboxylase 1 (alpha), HSD17B4 - hydroxysteroid (17-beta) dehydrogenase 4, SCD5 - stearoyl-coa desaturase 5, SUCLG2 - succinate-coa ligase, gdp-forming, beta subunit, AARS - alanyl-trna synthetase, SUCLG1 - succinate-coa ligase, alpha subunit, BCKDK - branched chain ketoacid dehydrogenase kinase, ABAT - 4-aminobu…
GO:0042787	protein ubiquitination involved in ubiquitin-dependent protein catabolic process	1.86e-05	0.00176	1.38	4577	57	2963	51	[RMND5A - required for meiotic nuclear division 5 homolog a (s. cerevisiae), KLHL2 - kelch-like family member 2, BTBD3 - btb (poz) domain containing 3, UBE2Z - ubiquitin-conjugating enzyme e2z, RNF34 - ring finger protein 34, e3 ubiquitin protein ligase, CDC27 - cell division cycle 27, KLHL8 - kelch-like family member 8, ANKIB1 - ankyrin repeat and ibr domain containing 1, RNF14 - ring finger pro…
GO:0045664	regulation of neuron differentiation	1.85e-05	0.00177	1.2	4577	215	2963	167	[ZMYND8 - zinc finger, mynd-type containing 8, LRIG2 - leucine-rich repeats and immunoglobulin-like domains 2, PDLIM5 - pdz and lim domain 5, ITM2C - integral membrane protein 2c, CASZ1 - castor zinc finger 1, ZEB1 - zinc finger e-box binding homeobox 1, TRAK1 - trafficking protein, kinesin binding 1, GDI1 - gdp dissociation inhibitor 1, BRAF - v-raf murine sarcoma viral oncogene homolog b, LIMK1…
GO:0009896	positive regulation of catabolic process	2.01e-05	0.00189	1.22	4577	169	2963	134	[TOB1 - transducer of erbb2, 1, PSMD6 - proteasome (prosome, macropain) 26s subunit, non-atpase, 6, SNF8 - snf8, escrt-ii complex subunit, METTL14 - methyltransferase like 14, CDC27 - cell division cycle 27, SGSM3 - small g protein signaling modulator 3, ANKIB1 - ankyrin repeat and ibr domain containing 1, RNF14 - ring finger protein 14, PSEN1 - presenilin 1, DCN - decorin, RDX - radixin, NDFIP1 …
GO:0019752	carboxylic acid metabolic process	2.06e-05	0.00192	1.2	4577	211	2963	164	[GFPT1 - glutamine--fructose-6-phosphate transaminase 1, MCCC1 - methylcrotonoyl-coa carboxylase 1 (alpha), HSD17B4 - hydroxysteroid (17-beta) dehydrogenase 4, SCD5 - stearoyl-coa desaturase 5, SUCLG2 - succinate-coa ligase, gdp-forming, beta subunit, AARS - alanyl-trna synthetase, DARS2 - aspartyl-trna synthetase 2, mitochondrial, SUCLG1 - succinate-coa ligase, alpha subunit, BCKDK - branched ch…
GO:0098655	cation transmembrane transport	2.13e-05	0.00197	1.23	4577	158	2963	126	[AFG3L2 - afg3 atpase family member 3-like 2 (s. cerevisiae), SLC4A10 - solute carrier family 4, sodium bicarbonate transporter, member 10, SLC39A11 - solute carrier family 39, member 11, KCNAB2 - potassium voltage-gated channel, shaker-related subfamily, beta member 2, DENND5A - denn/madd domain containing 5a, JPH3 - junctophilin 3, SLC41A1 - solute carrier family 41 (magnesium transporter), mem…
GO:0071310	cellular response to organic substance	2.4e-05	0.0022	1.15	4577	380	2963	282	[BRAF - v-raf murine sarcoma viral oncogene homolog b, RFX2 - regulatory factor x, 2 (influences hla class ii expression), GATSL3 - gats protein-like 3, NRP1 - neuropilin 1, IQGAP1 - iq motif containing gtpase activating protein 1, PAK4 - p21 protein (cdc42/rac)-activated kinase 4, RDX - radixin, SPI1 - spleen focus forming virus (sffv) proviral integration oncogene, SPARC - secreted protein, aci…
GO:0071417	cellular response to organonitrogen compound	2.58e-05	0.00235	1.24	4577	139	2963	112	[ZEB1 - zinc finger e-box binding homeobox 1, SIN3A - sin3 transcription regulator family member a, GATSL3 - gats protein-like 3, DDC - dopa decarboxylase (aromatic l-amino acid decarboxylase), C2CD5 - c2 calcium-dependent domain containing 5, PSEN1 - presenilin 1, BCL11A - b-cell cll/lymphoma 11a (zinc finger protein), FOXO3 - forkhead box o3, KLF5 - kruppel-like factor 5 (intestinal), SOX9 - sr…
GO:0000165	MAPK cascade	2.66e-05	0.00238	1.28	4577	109	2963	90	[PSMD6 - proteasome (prosome, macropain) 26s subunit, non-atpase, 6, TAB1 - tgf-beta activated kinase 1/map3k7 binding protein 1, SPTAN1 - spectrin, alpha, non-erythrocytic 1, BRAF - v-raf murine sarcoma viral oncogene homolog b, LAMTOR3 - late endosomal/lysosomal adaptor, mapk and mtor activator 3, CAMK2G - calcium/calmodulin-dependent protein kinase ii gamma, TAOK1 - tao kinase 1, CAMK2B - calc…
GO:0050804	modulation of chemical synaptic transmission	2.66e-05	0.0024	1.28	4577	109	2963	90	[ZMYND8 - zinc finger, mynd-type containing 8, SYN1 - synapsin i, PXK - px domain containing serine/threonine kinase, CHRNB2 - cholinergic receptor, nicotinic, beta 2 (neuronal), ATP2A2 - atpase, ca++ transporting, cardiac muscle, slow twitch 2, SLC8A3 - solute carrier family 8 (sodium/calcium exchanger), member 3, NLGN2 - neuroligin 2, BRAF - v-raf murine sarcoma viral oncogene homolog b, ATP1A2…
GO:0072511	divalent inorganic cation transport	3.04e-05	0.00269	1.3	4577	93	2963	78	[AFG3L2 - afg3 atpase family member 3-like 2 (s. cerevisiae), SLC39A11 - solute carrier family 39, member 11, ATP2B1 - atpase, ca++ transporting, plasma membrane 1, ATP2B2 - atpase, ca++ transporting, plasma membrane 2, SLC39A13 - solute carrier family 39 (zinc transporter), member 13, CHRNB2 - cholinergic receptor, nicotinic, beta 2 (neuronal), ATP2A2 - atpase, ca++ transporting, cardiac muscle,…
GO:0008380	RNA splicing	3.08e-05	0.00271	1.27	4577	116	2963	95	[DHX9 - deah (asp-glu-ala-his) box helicase 9, HNRNPUL1 - heterogeneous nuclear ribonucleoprotein u-like 1, DHX8 - deah (asp-glu-ala-his) box polypeptide 8, CSTF1 - cleavage stimulation factor, 3' pre-rna, subunit 1, 50kda, NCBP1 - nuclear cap binding protein subunit 1, 80kda, DBR1 - debranching rna lariats 1, LUC7L3 - luc7-like 3 (s. cerevisiae), SYMPK - symplekin, DDX1 - dead (asp-glu-ala-asp) …
GO:0018193	peptidyl-amino acid modification	3.14e-05	0.00274	1.15	4577	336	2963	251	[NDUFAF5 - nadh dehydrogenase (ubiquinone) complex i, assembly factor 5, TADA1 - transcriptional adaptor 1, GGCX - gamma-glutamyl carboxylase, DAPK2 - death-associated protein kinase 2, WHSC1L1 - wolf-hirschhorn syndrome candidate 1-like 1, EP300 - e1a binding protein p300, SPI1 - spleen focus forming virus (sffv) proviral integration oncogene, C16orf80 - chromosome 16 open reading frame 80, BTK …
GO:0060284	regulation of cell development	3.28e-05	0.00284	1.17	4577	283	2963	214	[ZMYND8 - zinc finger, mynd-type containing 8, ITM2C - integral membrane protein 2c, CASZ1 - castor zinc finger 1, LIG4 - ligase iv, dna, atp-dependent, TRAK1 - trafficking protein, kinesin binding 1, BRAF - v-raf murine sarcoma viral oncogene homolog b, LRRC16A - leucine rich repeat containing 16a, LIMK1 - lim domain kinase 1, GDI1 - gdp dissociation inhibitor 1, CORO1C - coronin, actin binding …
GO:0050896	response to stimulus	3.74e-05	0.00321	1.07	4577	1260	2963	873	[AFG3L2 - afg3 atpase family member 3-like 2 (s. cerevisiae), GFPT1 - glutamine--fructose-6-phosphate transaminase 1, KDELR1 - kdel (lys-asp-glu-leu) endoplasmic reticulum protein retention receptor 1, GDI1 - gdp dissociation inhibitor 1, ABAT - 4-aminobutyrate aminotransferase, GATSL3 - gats protein-like 3, GEM - gtp binding protein overexpressed in skeletal muscle, ABCF1 - atp-binding cassette,…
GO:0031331	positive regulation of cellular catabolic process	4.13e-05	0.00352	1.23	4577	155	2963	123	[PSMD6 - proteasome (prosome, macropain) 26s subunit, non-atpase, 6, TOB1 - transducer of erbb2, 1, METTL14 - methyltransferase like 14, CDC27 - cell division cycle 27, ANKIB1 - ankyrin repeat and ibr domain containing 1, RNF14 - ring finger protein 14, PSEN1 - presenilin 1, DCN - decorin, RDX - radixin, UPF1 - upf1 regulator of nonsense transcripts homolog (yeast), RAB3GAP1 - rab3 gtpase activat…
GO:0044281	small molecule metabolic process	4.48e-05	0.00379	1.13	4577	440	2963	322	[SMARCAD1 - swi/snf-related, matrix-associated actin-dependent regulator of chromatin, subfamily a, containing dead/h box 1, GFPT1 - glutamine--fructose-6-phosphate transaminase 1, MCCC1 - methylcrotonoyl-coa carboxylase 1 (alpha), HSD17B4 - hydroxysteroid (17-beta) dehydrogenase 4, SCD5 - stearoyl-coa desaturase 5, STARD3 - star-related lipid transfer (start) domain containing 3, AARS - alanyl-t…
GO:0006812	cation transport	4.76e-05	0.00397	1.19	4577	217	2963	167	[AFG3L2 - afg3 atpase family member 3-like 2 (s. cerevisiae), SLC4A10 - solute carrier family 4, sodium bicarbonate transporter, member 10, SLC39A11 - solute carrier family 39, member 11, KCNAB2 - potassium voltage-gated channel, shaker-related subfamily, beta member 2, DENND5A - denn/madd domain containing 5a, SERINC3 - serine incorporator 3, JPH3 - junctophilin 3, SLC41A1 - solute carrier famil…
GO:0042176	regulation of protein catabolic process	4.74e-05	0.00398	1.24	4577	140	2963	112	[PSMD6 - proteasome (prosome, macropain) 26s subunit, non-atpase, 6, LRIG2 - leucine-rich repeats and immunoglobulin-like domains 2, SNF8 - snf8, escrt-ii complex subunit, CDC27 - cell division cycle 27, SGSM3 - small g protein signaling modulator 3, ANKIB1 - ankyrin repeat and ibr domain containing 1, RNF14 - ring finger protein 14, PSEN1 - presenilin 1, RDX - radixin, NDFIP1 - nedd4 family inte…
GO:0018394	peptidyl-lysine acetylation	4.88e-05	0.00403	1.43	4577	40	2963	37	[BRPF1 - bromodomain and phd finger containing, 1, ACTL6A - actin-like 6a, EPC2 - enhancer of polycomb homolog 2 (drosophila), TADA1 - transcriptional adaptor 1, TAF5 - taf5 rna polymerase ii, tata box binding protein (tbp)-associated factor, 100kda, MCRS1 - microspherule protein 1, CHD5 - chromodomain helicase dna binding protein 5, EPC1 - enhancer of polycomb homolog 1 (drosophila), NAA40 - n(a…
GO:0048856	anatomical structure development	5.09e-05	0.00418	1.08	4577	968	2963	678	[AFG3L2 - afg3 atpase family member 3-like 2 (s. cerevisiae), TTC26 - tetratricopeptide repeat domain 26, LIG4 - ligase iv, dna, atp-dependent, AARS - alanyl-trna synthetase, LIMK1 - lim domain kinase 1, ABAT - 4-aminobutyrate aminotransferase, PATZ1 - poz (btb) and at hook containing zinc finger 1, GRHL2 - grainyhead-like 2 (drosophila), SPG7 - spastic paraplegia 7 (pure and complicated autosoma…
GO:0045595	regulation of cell differentiation	5.31e-05	0.00432	1.12	4577	524	2963	379	[ZMYND8 - zinc finger, mynd-type containing 8, TOB1 - transducer of erbb2, 1, ITM2C - integral membrane protein 2c, CASZ1 - castor zinc finger 1, BNIP2 - bcl2/adenovirus e1b 19kda interacting protein 2, LIG4 - ligase iv, dna, atp-dependent, TRAK1 - trafficking protein, kinesin binding 1, LRRC16A - leucine rich repeat containing 16a, LIMK1 - lim domain kinase 1, GDI1 - gdp dissociation inhibitor 1…
GO:2000060	positive regulation of protein ubiquitination involved in ubiquitin-dependent protein catabolic process	5.39e-05	0.00436	1.49	4577	29	2963	28	[PSMD14 - proteasome (prosome, macropain) 26s subunit, non-atpase, 14, PSMD6 - proteasome (prosome, macropain) 26s subunit, non-atpase, 6, CDC16 - cell division cycle 16, PSMD12 - proteasome (prosome, macropain) 26s subunit, non-atpase, 12, PSMD11 - proteasome (prosome, macropain) 26s subunit, non-atpase, 11, AXIN1 - axin 1, ANAPC7 - anaphase promoting complex subunit 7, PTEN - phosphatase and te…
GO:0016570	histone modification	5.44e-05	0.00436	1.23	4577	143	2963	114	[ZMYND8 - zinc finger, mynd-type containing 8, SMARCAD1 - swi/snf-related, matrix-associated actin-dependent regulator of chromatin, subfamily a, containing dead/h box 1, PCGF5 - polycomb group ring finger 5, TADA1 - transcriptional adaptor 1, SETDB1 - set domain, bifurcated 1, SIN3A - sin3 transcription regulator family member a, WHSC1L1 - wolf-hirschhorn syndrome candidate 1-like 1, BCOR - bcl6…
GO:0061024	membrane organization	6.18e-05	0.00492	1.17	4577	246	2963	187	[AFG3L2 - afg3 atpase family member 3-like 2 (s. cerevisiae), TBC1D20 - tbc1 domain family, member 20, SPIRE1 - spire actin nucleation factor 1, GDI1 - gdp dissociation inhibitor 1, RAB8B - rab8b, member ras oncogene family, DENND5A - denn/madd domain containing 5a, ATP8A2 - atpase, aminophospholipid transporter, class i, type 8a, member 2, RIN2 - ras and rab interactor 2, ELMO1 - engulfment and …
GO:0009719	response to endogenous stimulus	6.49e-05	0.00513	1.16	4577	279	2963	210	[BRAF - v-raf murine sarcoma viral oncogene homolog b, GATSL3 - gats protein-like 3, SCAP - srebf chaperone, IQGAP1 - iq motif containing gtpase activating protein 1, RDX - radixin, SPARC - secreted protein, acidic, cysteine-rich (osteonectin), KLF5 - kruppel-like factor 5 (intestinal), KAT2A - k(lysine) acetyltransferase 2a, MTSS1L - metastasis suppressor 1-like, ACAT1 - acetyl-coa acetyltransfe…
GO:0051437	positive regulation of ubiquitin-protein ligase activity involved in regulation of mitotic cell cycle transition	6.81e-05	0.00527	1.54	4577	22	2963	22	[PSMD14 - proteasome (prosome, macropain) 26s subunit, non-atpase, 14, PSMD6 - proteasome (prosome, macropain) 26s subunit, non-atpase, 6, CDC16 - cell division cycle 16, PSMD12 - proteasome (prosome, macropain) 26s subunit, non-atpase, 12, PSMD11 - proteasome (prosome, macropain) 26s subunit, non-atpase, 11, ANAPC4 - anaphase promoting complex subunit 4, PSMA5 - proteasome (prosome, macropain) s…
GO:0018393	internal peptidyl-lysine acetylation	7.02e-05	0.00528	1.43	4577	39	2963	36	[ACTL6A - actin-like 6a, BRPF1 - bromodomain and phd finger containing, 1, EPC2 - enhancer of polycomb homolog 2 (drosophila), TAF5 - taf5 rna polymerase ii, tata box binding protein (tbp)-associated factor, 100kda, TADA1 - transcriptional adaptor 1, MCRS1 - microspherule protein 1, CHD5 - chromodomain helicase dna binding protein 5, EPC1 - enhancer of polycomb homolog 1 (drosophila), NAA40 - n(a…
GO:2000058	regulation of protein ubiquitination involved in ubiquitin-dependent protein catabolic process	6.73e-05	0.00529	1.45	4577	34	2963	32	[PSMD12 - proteasome (prosome, macropain) 26s subunit, non-atpase, 12, CDC16 - cell division cycle 16, PSMD6 - proteasome (prosome, macropain) 26s subunit, non-atpase, 6, PSMD14 - proteasome (prosome, macropain) 26s subunit, non-atpase, 14, PSMD11 - proteasome (prosome, macropain) 26s subunit, non-atpase, 11, AXIN1 - axin 1, ANAPC7 - anaphase promoting complex subunit 7, PTEN - phosphatase and te…
GO:1905114	cell surface receptor signaling pathway involved in cell-cell signaling	6.89e-05	0.0053	1.26	4577	109	2963	89	[PSMD6 - proteasome (prosome, macropain) 26s subunit, non-atpase, 6, AP2A1 - adaptor-related protein complex 2, alpha 1 subunit, PRKAA1 - protein kinase, amp-activated, alpha 1 catalytic subunit, TNRC6A - trinucleotide repeat containing 6a, TLE1 - transducin-like enhancer of split 1 (e(sp1) homolog, drosophila), CAMK2A - calcium/calmodulin-dependent protein kinase ii alpha, TLE3 - transducin-like…
GO:0032502	developmental process	6.95e-05	0.0053	1.06	4577	1392	2963	958	[AFG3L2 - afg3 atpase family member 3-like 2 (s. cerevisiae), KDELR1 - kdel (lys-asp-glu-leu) endoplasmic reticulum protein retention receptor 1, TTC26 - tetratricopeptide repeat domain 26, AARS - alanyl-trna synthetase, ABAT - 4-aminobutyrate aminotransferase, GRHL2 - grainyhead-like 2 (drosophila), PLXNB1 - plexin b1, LZTR1 - leucine-zipper-like transcription regulator 1, ABR - active bcr-relat…
GO:0050805	negative regulation of synaptic transmission	6.81e-05	0.00531	1.54	4577	22	2963	22	[STXBP1 - syntaxin binding protein 1, ADNP - activity-dependent neuroprotector homeobox, GRIK2 - glutamate receptor, ionotropic, kainate 2, GRIK3 - glutamate receptor, ionotropic, kainate 3, ABHD6 - abhydrolase domain containing 6, PCDH17 - protocadherin 17, PTEN - phosphatase and tensin homolog, BRAF - v-raf murine sarcoma viral oncogene homolog b, PLA2G6 - phospholipase a2, group vi (cytosolic,…
GO:0006475	internal protein amino acid acetylation	7.02e-05	0.00532	1.43	4577	39	2963	36	[BRPF1 - bromodomain and phd finger containing, 1, ACTL6A - actin-like 6a, EPC2 - enhancer of polycomb homolog 2 (drosophila), TADA1 - transcriptional adaptor 1, TAF5 - taf5 rna polymerase ii, tata box binding protein (tbp)-associated factor, 100kda, MCRS1 - microspherule protein 1, CHD5 - chromodomain helicase dna binding protein 5, EPC1 - enhancer of polycomb homolog 1 (drosophila), NAA40 - n(a…
GO:0070588	calcium ion transmembrane transport	7.84e-05	0.00586	1.36	4577	57	2963	50	[AFG3L2 - afg3 atpase family member 3-like 2 (s. cerevisiae), ATP2B1 - atpase, ca++ transporting, plasma membrane 1, ATP2B2 - atpase, ca++ transporting, plasma membrane 2, ATP2A2 - atpase, ca++ transporting, cardiac muscle, slow twitch 2, SLC8A3 - solute carrier family 8 (sodium/calcium exchanger), member 3, DENND5A - denn/madd domain containing 5a, SLC8A2 - solute carrier family 8 (sodium/calciu…
GO:1901699	cellular response to nitrogen compound	7.91e-05	0.00587	1.22	4577	152	2963	120	[DHX9 - deah (asp-glu-ala-his) box helicase 9, ZEB1 - zinc finger e-box binding homeobox 1, SIN3A - sin3 transcription regulator family member a, GATSL3 - gats protein-like 3, DDC - dopa decarboxylase (aromatic l-amino acid decarboxylase), C2CD5 - c2 calcium-dependent domain containing 5, PSEN1 - presenilin 1, BCL11A - b-cell cll/lymphoma 11a (zinc finger protein), FOXO3 - forkhead box o3, KLF5 -…
GO:0051128	regulation of cellular component organization	8.09e-05	0.00597	1.09	4577	831	2963	585	[ZMYND8 - zinc finger, mynd-type containing 8, BMP2K - bmp2 inducible kinase, SPTAN1 - spectrin, alpha, non-erythrocytic 1, EXOSC10 - exosome component 10, LIG4 - ligase iv, dna, atp-dependent, GDI1 - gdp dissociation inhibitor 1, LRRC16A - leucine rich repeat containing 16a, LIMK1 - lim domain kinase 1, CORO1C - coronin, actin binding protein, 1c, LINGO1 - leucine rich repeat and ig domain conta…

## Sheet: high conservation,high variance
GO Term	Description	P-value	FDR q-value	Enrichment	N	B	n	b	Genes
GO:0036211	protein modification process	8.18e-26	4.79e-22	1.27	5590	1074	2970	723	[BMP2K - bmp2 inducible kinase, PCGF5 - polycomb group ring finger 5, GFPT1 - glutamine--fructose-6-phosphate transaminase 1, GFRA1 - gdnf family receptor alpha 1, GGCX - gamma-glutamyl carboxylase, TADA1 - transcriptional adaptor 1, MAP3K8 - mitogen-activated protein kinase kinase kinase 8, DAPK2 - death-associated protein kinase 2, LIMK1 - lim domain kinase 1, ABCA1 - atp-binding cassette, sub-…
GO:0006464	cellular protein modification process	8.18e-26	9.57e-22	1.27	5590	1074	2970	723	[BMP2K - bmp2 inducible kinase, PCGF5 - polycomb group ring finger 5, GFPT1 - glutamine--fructose-6-phosphate transaminase 1, GFRA1 - gdnf family receptor alpha 1, GGCX - gamma-glutamyl carboxylase, TADA1 - transcriptional adaptor 1, MAP3K8 - mitogen-activated protein kinase kinase kinase 8, DAPK2 - death-associated protein kinase 2, LIMK1 - lim domain kinase 1, ABCA1 - atp-binding cassette, sub-…
GO:0044237	cellular metabolic process	1.05e-24	2.45e-21	1.13	5590	2783	2970	1669	[AFG3L2 - afg3 atpase family member 3-like 2 (s. cerevisiae), BMP2K - bmp2 inducible kinase, TADA1 - transcriptional adaptor 1, STARD3 - star-related lipid transfer (start) domain containing 3, LRRC16A - leucine rich repeat containing 16a, ABAT - 4-aminobutyrate aminotransferase, ABCA1 - atp-binding cassette, sub-family a (abc1), member 1, ABCF1 - atp-binding cassette, sub-family f (gcn20), membe…
GO:0044267	cellular protein metabolic process	6.73e-25	2.63e-21	1.25	5590	1144	2970	761	[AFG3L2 - afg3 atpase family member 3-like 2 (s. cerevisiae), BMP2K - bmp2 inducible kinase, PCGF5 - polycomb group ring finger 5, GFPT1 - glutamine--fructose-6-phosphate transaminase 1, GFRA1 - gdnf family receptor alpha 1, GGCX - gamma-glutamyl carboxylase, TADA1 - transcriptional adaptor 1, MAP3K8 - mitogen-activated protein kinase kinase kinase 8, DAPK2 - death-associated protein kinase 2, LI…
GO:0043412	macromolecule modification	1e-24	2.93e-21	1.25	5590	1157	2970	768	[BMP2K - bmp2 inducible kinase, PCGF5 - polycomb group ring finger 5, GFPT1 - glutamine--fructose-6-phosphate transaminase 1, GFRA1 - gdnf family receptor alpha 1, TADA1 - transcriptional adaptor 1, GGCX - gamma-glutamyl carboxylase, MAP3K8 - mitogen-activated protein kinase kinase kinase 8, DAPK2 - death-associated protein kinase 2, LIMK1 - lim domain kinase 1, ABCA1 - atp-binding cassette, sub-…
GO:1901564	organonitrogen compound metabolic process	1.43e-20	2.78e-17	1.17	5590	1755	2970	1092	[AFG3L2 - afg3 atpase family member 3-like 2 (s. cerevisiae), BMP2K - bmp2 inducible kinase, GFPT1 - glutamine--fructose-6-phosphate transaminase 1, GFRA1 - gdnf family receptor alpha 1, TADA1 - transcriptional adaptor 1, GGCX - gamma-glutamyl carboxylase, LRRC16A - leucine rich repeat containing 16a, ABAT - 4-aminobutyrate aminotransferase, ABCA1 - atp-binding cassette, sub-family a (abc1), memb…
GO:0044238	primary metabolic process	2.87e-20	4.81e-17	1.12	5590	2765	2970	1640	[AFG3L2 - afg3 atpase family member 3-like 2 (s. cerevisiae), BMP2K - bmp2 inducible kinase, TADA1 - transcriptional adaptor 1, STARD3 - star-related lipid transfer (start) domain containing 3, ABAT - 4-aminobutyrate aminotransferase, ABCA1 - atp-binding cassette, sub-family a (abc1), member 1, ABCF1 - atp-binding cassette, sub-family f (gcn20), member 1, SERINC3 - serine incorporator 3, GALNT10 …
GO:0009987	cellular process	3.56e-20	5.21e-17	1.06	5590	4483	2970	2518	[AFG3L2 - afg3 atpase family member 3-like 2 (s. cerevisiae), BMP2K - bmp2 inducible kinase, AGAP3 - arfgap with gtpase domain, ankyrin repeat and ph domain 3, KDELR1 - kdel (lys-asp-glu-leu) endoplasmic reticulum protein retention receptor 1, PRRX1 - paired related homeobox 1, TADA1 - transcriptional adaptor 1, AP3M2 - adaptor-related protein complex 3, mu 2 subunit, STARD3 - star-related lipid …
GO:0071704	organic substance metabolic process	9.53e-20	1.24e-16	1.11	5590	2892	2970	1705	[AFG3L2 - afg3 atpase family member 3-like 2 (s. cerevisiae), BMP2K - bmp2 inducible kinase, TADA1 - transcriptional adaptor 1, STARD3 - star-related lipid transfer (start) domain containing 3, LRRC16A - leucine rich repeat containing 16a, ABAT - 4-aminobutyrate aminotransferase, ABCA1 - atp-binding cassette, sub-family a (abc1), member 1, ABCF1 - atp-binding cassette, sub-family f (gcn20), membe…
GO:0006807	nitrogen compound metabolic process	2.26e-18	2.64e-15	1.12	5590	2561	2970	1522	[AFG3L2 - afg3 atpase family member 3-like 2 (s. cerevisiae), BMP2K - bmp2 inducible kinase, GFPT1 - glutamine--fructose-6-phosphate transaminase 1, GFRA1 - gdnf family receptor alpha 1, SYMPK - symplekin, GGCX - gamma-glutamyl carboxylase, TADA1 - transcriptional adaptor 1, LRRC16A - leucine rich repeat containing 16a, ABAT - 4-aminobutyrate aminotransferase, ABCA1 - atp-binding cassette, sub-fa…
GO:0044260	cellular macromolecule metabolic process	6.7e-18	7.13e-15	1.14	5590	2054	2970	1245	[AFG3L2 - afg3 atpase family member 3-like 2 (s. cerevisiae), BMP2K - bmp2 inducible kinase, GFPT1 - glutamine--fructose-6-phosphate transaminase 1, GFRA1 - gdnf family receptor alpha 1, SYMPK - symplekin, TADA1 - transcriptional adaptor 1, GGCX - gamma-glutamyl carboxylase, ABCA1 - atp-binding cassette, sub-family a (abc1), member 1, ABCF1 - atp-binding cassette, sub-family f (gcn20), member 1, …
GO:0008152	metabolic process	2.05e-17	2e-14	1.1	5590	3027	2970	1765	[AFG3L2 - afg3 atpase family member 3-like 2 (s. cerevisiae), BMP2K - bmp2 inducible kinase, TADA1 - transcriptional adaptor 1, STARD3 - star-related lipid transfer (start) domain containing 3, LRRC16A - leucine rich repeat containing 16a, ABAT - 4-aminobutyrate aminotransferase, ABCA1 - atp-binding cassette, sub-family a (abc1), member 1, ABCF1 - atp-binding cassette, sub-family f (gcn20), membe…
GO:0019538	protein metabolic process	8.01e-17	7.22e-14	1.18	5590	1361	2970	855	[AFG3L2 - afg3 atpase family member 3-like 2 (s. cerevisiae), BMP2K - bmp2 inducible kinase, GFPT1 - glutamine--fructose-6-phosphate transaminase 1, GFRA1 - gdnf family receptor alpha 1, TADA1 - transcriptional adaptor 1, GGCX - gamma-glutamyl carboxylase, ABCA1 - atp-binding cassette, sub-family a (abc1), member 1, ABCF1 - atp-binding cassette, sub-family f (gcn20), member 1, GALNT10 - udp-n-ace…
GO:0006793	phosphorus metabolic process	4.41e-16	3.69e-13	1.24	5590	816	2970	539	[BMP2K - bmp2 inducible kinase, GFPT1 - glutamine--fructose-6-phosphate transaminase 1, GFRA1 - gdnf family receptor alpha 1, SCD5 - stearoyl-coa desaturase 5, MAP3K8 - mitogen-activated protein kinase kinase kinase 8, DAPK2 - death-associated protein kinase 2, LIMK1 - lim domain kinase 1, CARD11 - caspase recruitment domain family, member 11, SERINC3 - serine incorporator 3, ABL2 - c-abl oncogen…
GO:0008150	biological_process	6.31e-16	4.93e-13	1.03	5590	5137	2970	2811	[AFG3L2 - afg3 atpase family member 3-like 2 (s. cerevisiae), BMP2K - bmp2 inducible kinase, AGAP3 - arfgap with gtpase domain, ankyrin repeat and ph domain 3, KDELR1 - kdel (lys-asp-glu-leu) endoplasmic reticulum protein retention receptor 1, PRRX1 - paired related homeobox 1, TADA1 - transcriptional adaptor 1, AP3M2 - adaptor-related protein complex 3, mu 2 subunit, STARD3 - star-related lipid …
GO:0006796	phosphate-containing compound metabolic process	3.2e-15	2.34e-12	1.24	5590	777	2970	513	[BMP2K - bmp2 inducible kinase, GFPT1 - glutamine--fructose-6-phosphate transaminase 1, GFRA1 - gdnf family receptor alpha 1, MAP3K8 - mitogen-activated protein kinase kinase kinase 8, DAPK2 - death-associated protein kinase 2, LIMK1 - lim domain kinase 1, CARD11 - caspase recruitment domain family, member 11, SERINC3 - serine incorporator 3, ABL2 - c-abl oncogene 2, non-receptor tyrosine kinase,…
GO:0043170	macromolecule metabolic process	1.16e-12	8.02e-10	1.11	5590	2261	2970	1330	[AFG3L2 - afg3 atpase family member 3-like 2 (s. cerevisiae), BMP2K - bmp2 inducible kinase, GFPT1 - glutamine--fructose-6-phosphate transaminase 1, GFRA1 - gdnf family receptor alpha 1, SYMPK - symplekin, GGCX - gamma-glutamyl carboxylase, TADA1 - transcriptional adaptor 1, ABCA1 - atp-binding cassette, sub-family a (abc1), member 1, ABCF1 - atp-binding cassette, sub-family f (gcn20), member 1, …
GO:0016567	protein ubiquitination	1.89e-12	1.23e-09	1.4	5590	249	2970	185	[PSMD6 - proteasome (prosome, macropain) 26s subunit, non-atpase, 6, WDSUB1 - wd repeat, sterile alpha motif and u-box domain containing 1, PCGF5 - polycomb group ring finger 5, TRIM3 - tripartite motif containing 3, RMND5A - required for meiotic nuclear division 5 homolog a (s. cerevisiae), KLHL2 - kelch-like family member 2, KCTD10 - potassium channel tetramerization domain containing 10, PAX6 …
GO:0070647	protein modification by small protein conjugation or removal	3.42e-12	2.11e-09	1.34	5590	325	2970	232	[PCGF5 - polycomb group ring finger 5, MAEA - macrophage erythroblast attacher, BCOR - bcl6 corepressor, KLHDC8B - kelch domain containing 8b, EPAS1 - endothelial pas domain protein 1, EP300 - e1a binding protein p300, RNF14 - ring finger protein 14, FBXO45 - f-box protein 45, DERL1 - derlin 1, KAT2A - k(lysine) acetyltransferase 2a, UBE2Q1 - ubiquitin-conjugating enzyme e2q family member 1, PLK1…
GO:0050789	regulation of biological process	1.19e-11	6.98e-09	1.07	5590	3372	2970	1914	[AFG3L2 - afg3 atpase family member 3-like 2 (s. cerevisiae), BMP2K - bmp2 inducible kinase, AGAP3 - arfgap with gtpase domain, ankyrin repeat and ph domain 3, PRRX1 - paired related homeobox 1, TADA1 - transcriptional adaptor 1, LRRC16A - leucine rich repeat containing 16a, CBX1 - chromobox homolog 1, ABAT - 4-aminobutyrate aminotransferase, ABCA1 - atp-binding cassette, sub-family a (abc1), mem…
GO:0050794	regulation of cellular process	1.33e-11	7.39e-09	1.07	5590	3193	2970	1820	[BMP2K - bmp2 inducible kinase, AGAP3 - arfgap with gtpase domain, ankyrin repeat and ph domain 3, PRRX1 - paired related homeobox 1, TADA1 - transcriptional adaptor 1, LRRC16A - leucine rich repeat containing 16a, CBX1 - chromobox homolog 1, ABAT - 4-aminobutyrate aminotransferase, ABCA1 - atp-binding cassette, sub-family a (abc1), member 1, SERINC3 - serine incorporator 3, PLXNB1 - plexin b1, P…
GO:0032446	protein modification by small protein conjugation	1.96e-11	1.04e-08	1.36	5590	272	2970	197	[PCGF5 - polycomb group ring finger 5, MAEA - macrophage erythroblast attacher, BCOR - bcl6 corepressor, KLHDC8B - kelch domain containing 8b, EPAS1 - endothelial pas domain protein 1, RNF14 - ring finger protein 14, FBXO45 - f-box protein 45, DERL1 - derlin 1, UBE2Q1 - ubiquitin-conjugating enzyme e2q family member 1, PLK1 - polo-like kinase 1, RING1 - ring finger protein 1, SYVN1 - synovial apo…
GO:0065007	biological regulation	2.45e-11	1.25e-08	1.06	5590	3591	2970	2026	[AFG3L2 - afg3 atpase family member 3-like 2 (s. cerevisiae), BMP2K - bmp2 inducible kinase, AGAP3 - arfgap with gtpase domain, ankyrin repeat and ph domain 3, KDELR1 - kdel (lys-asp-glu-leu) endoplasmic reticulum protein retention receptor 1, PRRX1 - paired related homeobox 1, TADA1 - transcriptional adaptor 1, STARD3 - star-related lipid transfer (start) domain containing 3, LRRC16A - leucine r…
GO:0071705	nitrogen compound transport	5.93e-11	2.89e-08	1.24	5590	549	2970	363	[NCBP1 - nuclear cap binding protein subunit 1, 80kda, CHMP4C - charged multivesicular body protein 4c, KDELR1 - kdel (lys-asp-glu-leu) endoplasmic reticulum protein retention receptor 1, SYMPK - symplekin, KIFAP3 - kinesin-associated protein 3, DDX25 - dead (asp-glu-ala-asp) box helicase 25, AP3M2 - adaptor-related protein complex 3, mu 2 subunit, SPIRE1 - spire actin nucleation factor 1, PDIA4 …
GO:0016310	phosphorylation	1.02e-10	4.79e-08	1.28	5590	431	2970	292	[CCNK - cyclin k, BMP2K - bmp2 inducible kinase, GFRA1 - gdnf family receptor alpha 1, DAPK2 - death-associated protein kinase 2, MAP3K8 - mitogen-activated protein kinase kinase kinase 8, LIMK1 - lim domain kinase 1, BCKDK - branched chain ketoacid dehydrogenase kinase, CDKL4 - cyclin-dependent kinase-like 4, ABL2 - c-abl oncogene 2, non-receptor tyrosine kinase, PAK4 - p21 protein (cdc42/rac)-a…
GO:0048598	embryonic morphogenesis	2.18e-10	9.8e-08	1.47	5590	149	2970	116	[PAX2 - paired box 2, PRRX1 - paired related homeobox 1, ITGA8 - integrin, alpha 8, PAX6 - paired box 6, TCF21 - transcription factor 21, PBX2 - pre-b-cell leukemia homeobox 2, HES1 - hairy and enhancer of split 1, (drosophila), PBX1 - pre-b-cell leukemia homeobox 1, ABR - active bcr-related, PSEN1 - presenilin 1, DYNC2H1 - dynein, cytoplasmic 2, heavy chain 1, ZBTB16 - zinc finger and btb domain…
GO:1901576	organic substance biosynthetic process	3.11e-10	1.35e-07	1.14	5590	1303	2970	790	[GFPT1 - glutamine--fructose-6-phosphate transaminase 1, SYMPK - symplekin, TADA1 - transcriptional adaptor 1, SCD5 - stearoyl-coa desaturase 5, STARD3 - star-related lipid transfer (start) domain containing 3, ABAT - 4-aminobutyrate aminotransferase, ABCF1 - atp-binding cassette, sub-family f (gcn20), member 1, SERINC3 - serine incorporator 3, PMM1 - phosphomannomutase 1, ELOVL7 - elovl fatty ac…
GO:0009058	biosynthetic process	5.4e-10	2.26e-07	1.14	5590	1327	2970	802	[GFPT1 - glutamine--fructose-6-phosphate transaminase 1, SYMPK - symplekin, TADA1 - transcriptional adaptor 1, SCD5 - stearoyl-coa desaturase 5, STARD3 - star-related lipid transfer (start) domain containing 3, ABAT - 4-aminobutyrate aminotransferase, ABCF1 - atp-binding cassette, sub-family f (gcn20), member 1, SERINC3 - serine incorporator 3, PMM1 - phosphomannomutase 1, GCHFR - gtp cyclohydrol…
GO:0051649	establishment of localization in cell	1.82e-09	7.36e-07	1.23	5590	530	2970	346	[AFG3L2 - afg3 atpase family member 3-like 2 (s. cerevisiae), TBC1D20 - tbc1 domain family, member 20, NCBP1 - nuclear cap binding protein subunit 1, 80kda, CHMP4C - charged multivesicular body protein 4c, CCDC64 - coiled-coil domain containing 64, SYMPK - symplekin, KDELR1 - kdel (lys-asp-glu-leu) endoplasmic reticulum protein retention receptor 1, KIFAP3 - kinesin-associated protein 3, DDX25 - …
GO:0016569	covalent chromatin modification	2.53e-09	9.86e-07	1.46	5590	137	2970	106	[PCGF5 - polycomb group ring finger 5, VPS72 - vacuolar protein sorting 72 homolog (s. cerevisiae), TADA1 - transcriptional adaptor 1, WHSC1L1 - wolf-hirschhorn syndrome candidate 1-like 1, ELK4 - elk4, ets-domain protein (srf accessory protein 1), BCOR - bcl6 corepressor, EP300 - e1a binding protein p300, SPI1 - spleen focus forming virus (sffv) proviral integration oncogene, ING2 - inhibitor of…
GO:0044249	cellular biosynthetic process	4.18e-09	1.58e-06	1.14	5590	1252	2970	755	[ZNF341 - zinc finger protein 341, PCGF5 - polycomb group ring finger 5, GFPT1 - glutamine--fructose-6-phosphate transaminase 1, SYMPK - symplekin, TADA1 - transcriptional adaptor 1, SCD5 - stearoyl-coa desaturase 5, LIG4 - ligase iv, dna, atp-dependent, NCOA5 - nuclear receptor coactivator 5, STARD3 - star-related lipid transfer (start) domain containing 3, ABAT - 4-aminobutyrate aminotransferas…
GO:0031323	regulation of cellular metabolic process	5.04e-09	1.84e-06	1.1	5590	1854	2970	1086	[PRRX1 - paired related homeobox 1, SYMPK - symplekin, TADA1 - transcriptional adaptor 1, MSTN - myostatin, ABAT - 4-aminobutyrate aminotransferase, CBX1 - chromobox homolog 1, ABCA1 - atp-binding cassette, sub-family a (abc1), member 1, ABL2 - c-abl oncogene 2, non-receptor tyrosine kinase, LZTR1 - leucine-zipper-like transcription regulator 1, ACADL - acyl-coa dehydrogenase, long chain, GCH1 - …
GO:0046907	intracellular transport	5.89e-09	2.09e-06	1.23	5590	479	2970	314	[AFG3L2 - afg3 atpase family member 3-like 2 (s. cerevisiae), TBC1D20 - tbc1 domain family, member 20, NCBP1 - nuclear cap binding protein subunit 1, 80kda, CHMP4C - charged multivesicular body protein 4c, CCDC64 - coiled-coil domain containing 64, SYMPK - symplekin, KDELR1 - kdel (lys-asp-glu-leu) endoplasmic reticulum protein retention receptor 1, KIFAP3 - kinesin-associated protein 3, DDX25 - …
GO:0019222	regulation of metabolic process	6.85e-09	2.36e-06	1.1	5590	1977	2970	1152	[GFPT1 - glutamine--fructose-6-phosphate transaminase 1, PRRX1 - paired related homeobox 1, SYMPK - symplekin, TADA1 - transcriptional adaptor 1, MSTN - myostatin, ABAT - 4-aminobutyrate aminotransferase, CBX1 - chromobox homolog 1, ABCA1 - atp-binding cassette, sub-family a (abc1), member 1, ABL2 - c-abl oncogene 2, non-receptor tyrosine kinase, LZTR1 - leucine-zipper-like transcription regulato…
GO:0060255	regulation of macromolecule metabolic process	7.26e-09	2.43e-06	1.1	5590	1801	2970	1056	[GFPT1 - glutamine--fructose-6-phosphate transaminase 1, PRRX1 - paired related homeobox 1, SYMPK - symplekin, TADA1 - transcriptional adaptor 1, MSTN - myostatin, CBX1 - chromobox homolog 1, LZTR1 - leucine-zipper-like transcription regulator 1, GCK - glucokinase (hexokinase 4), KAT2A - k(lysine) acetyltransferase 2a, PLK1 - polo-like kinase 1, BRD8 - bromodomain containing 8, ACO1 - aconitase 1…
GO:0051641	cellular localization	8.69e-09	2.82e-06	1.19	5590	699	2970	441	[AFG3L2 - afg3 atpase family member 3-like 2 (s. cerevisiae), SYMPK - symplekin, KDELR1 - kdel (lys-asp-glu-leu) endoplasmic reticulum protein retention receptor 1, AP3M2 - adaptor-related protein complex 3, mu 2 subunit, STARD3 - star-related lipid transfer (start) domain containing 3, ABCA1 - atp-binding cassette, sub-family a (abc1), member 1, VPS37A - vacuolar protein sorting 37 homolog a (s.…
GO:0043161	proteasome-mediated ubiquitin-dependent protein catabolic process	9.79e-09	3.1e-06	1.53	5590	95	2970	77	[PSMD6 - proteasome (prosome, macropain) 26s subunit, non-atpase, 6, RMND5A - required for meiotic nuclear division 5 homolog a (s. cerevisiae), KLHL42 - kelch-like family member 42, KCTD10 - potassium channel tetramerization domain containing 10, BTBD3 - btb (poz) domain containing 3, MAEA - macrophage erythroblast attacher, RFWD2 - ring finger and wd repeat domain 2, e3 ubiquitin protein ligase…
GO:0015031	protein transport	1.29e-08	3.87e-06	1.24	5590	427	2970	282	[CHMP4C - charged multivesicular body protein 4c, KDELR1 - kdel (lys-asp-glu-leu) endoplasmic reticulum protein retention receptor 1, KIFAP3 - kinesin-associated protein 3, AP3M2 - adaptor-related protein complex 3, mu 2 subunit, SPIRE1 - spire actin nucleation factor 1, PDIA4 - protein disulfide isomerase family a, member 4, TRAK1 - trafficking protein, kinesin binding 1, GDI1 - gdp dissociation…
GO:0006468	protein phosphorylation	1.28e-08	3.94e-06	1.27	5590	348	2970	235	[CCNK - cyclin k, BMP2K - bmp2 inducible kinase, GFRA1 - gdnf family receptor alpha 1, MAP3K8 - mitogen-activated protein kinase kinase kinase 8, DAPK2 - death-associated protein kinase 2, LIMK1 - lim domain kinase 1, BCKDK - branched chain ketoacid dehydrogenase kinase, CDKL4 - cyclin-dependent kinase-like 4, ABL2 - c-abl oncogene 2, non-receptor tyrosine kinase, PAK4 - p21 protein (cdc42/rac)-a…
GO:0018193	peptidyl-amino acid modification	1.66e-08	4.86e-06	1.28	5590	327	2970	222	[NDUFAF5 - nadh dehydrogenase (ubiquinone) complex i, assembly factor 5, GGCX - gamma-glutamyl carboxylase, TADA1 - transcriptional adaptor 1, DAPK2 - death-associated protein kinase 2, DPY19L3 - dpy-19-like 3 (c. elegans), WHSC1L1 - wolf-hirschhorn syndrome candidate 1-like 1, ABL2 - c-abl oncogene 2, non-receptor tyrosine kinase, EP300 - e1a binding protein p300, SPI1 - spleen focus forming vir…
GO:0015833	peptide transport	2.5e-08	6.8e-06	1.24	5590	434	2970	285	[CHMP4C - charged multivesicular body protein 4c, KDELR1 - kdel (lys-asp-glu-leu) endoplasmic reticulum protein retention receptor 1, KIFAP3 - kinesin-associated protein 3, AP3M2 - adaptor-related protein complex 3, mu 2 subunit, SPIRE1 - spire actin nucleation factor 1, PDIA4 - protein disulfide isomerase family a, member 4, TRAK1 - trafficking protein, kinesin binding 1, GDI1 - gdp dissociation…
GO:0008104	protein localization	2.45e-08	6.83e-06	1.19	5590	628	2970	398	[KDELR1 - kdel (lys-asp-glu-leu) endoplasmic reticulum protein retention receptor 1, AP3M2 - adaptor-related protein complex 3, mu 2 subunit, PDIA4 - protein disulfide isomerase family a, member 4, GDI1 - gdp dissociation inhibitor 1, ABCA1 - atp-binding cassette, sub-family a (abc1), member 1, VPS37A - vacuolar protein sorting 37 homolog a (s. cerevisiae), CARD11 - caspase recruitment domain fam…
GO:0010498	proteasomal protein catabolic process	2.42e-08	6.92e-06	1.49	5590	102	2970	81	[PSMD6 - proteasome (prosome, macropain) 26s subunit, non-atpase, 6, RMND5A - required for meiotic nuclear division 5 homolog a (s. cerevisiae), KLHL42 - kelch-like family member 42, KCTD10 - potassium channel tetramerization domain containing 10, BTBD3 - btb (poz) domain containing 3, MAEA - macrophage erythroblast attacher, RFWD2 - ring finger and wd repeat domain 2, e3 ubiquitin protein ligase…
GO:0045184	establishment of protein localization	2.77e-08	7.36e-06	1.23	5590	453	2970	296	[CHMP4C - charged multivesicular body protein 4c, KDELR1 - kdel (lys-asp-glu-leu) endoplasmic reticulum protein retention receptor 1, KIFAP3 - kinesin-associated protein 3, AP3M2 - adaptor-related protein complex 3, mu 2 subunit, SPIRE1 - spire actin nucleation factor 1, PDIA4 - protein disulfide isomerase family a, member 4, TRAK1 - trafficking protein, kinesin binding 1, GDI1 - gdp dissociation…
GO:0033036	macromolecule localization	3.05e-08	7.95e-06	1.19	5590	634	2970	401	[KDELR1 - kdel (lys-asp-glu-leu) endoplasmic reticulum protein retention receptor 1, AP3M2 - adaptor-related protein complex 3, mu 2 subunit, PDIA4 - protein disulfide isomerase family a, member 4, GDI1 - gdp dissociation inhibitor 1, ABCA1 - atp-binding cassette, sub-family a (abc1), member 1, VPS37A - vacuolar protein sorting 37 homolog a (s. cerevisiae), CARD11 - caspase recruitment domain fam…
GO:0006325	chromatin organization	3.47e-08	8.83e-06	1.38	5590	169	2970	124	[VPS72 - vacuolar protein sorting 72 homolog (s. cerevisiae), PCGF5 - polycomb group ring finger 5, TADA1 - transcriptional adaptor 1, WHSC1L1 - wolf-hirschhorn syndrome candidate 1-like 1, ELK4 - elk4, ets-domain protein (srf accessory protein 1), BCOR - bcl6 corepressor, EP300 - e1a binding protein p300, ING2 - inhibitor of growth family, member 2, SPI1 - spleen focus forming virus (sffv) provi…
GO:0080090	regulation of primary metabolic process	3.63e-08	9.05e-06	1.1	5590	1810	2970	1056	[PRRX1 - paired related homeobox 1, SYMPK - symplekin, TADA1 - transcriptional adaptor 1, MSTN - myostatin, CBX1 - chromobox homolog 1, ABAT - 4-aminobutyrate aminotransferase, ABCA1 - atp-binding cassette, sub-family a (abc1), member 1, LZTR1 - leucine-zipper-like transcription regulator 1, ACADL - acyl-coa dehydrogenase, long chain, ACADM - acyl-coa dehydrogenase, c-4 to c-12 straight chain, GC…
GO:0010556	regulation of macromolecule biosynthetic process	4.03e-08	9.83e-06	1.13	5590	1200	2970	720	[ZNF341 - zinc finger protein 341, PCGF5 - polycomb group ring finger 5, PRRX1 - paired related homeobox 1, TADA1 - transcriptional adaptor 1, MSTN - myostatin, NCOA5 - nuclear receptor coactivator 5, PRR16 - proline rich 16, CBX1 - chromobox homolog 1, CARD11 - caspase recruitment domain family, member 11, NCOR2 - nuclear receptor corepressor 2, RNF14 - ring finger protein 14, LZTR1 - leucine-zi…
GO:0071702	organic substance transport	4.56e-08	1.09e-05	1.18	5590	686	2970	430	[KDELR1 - kdel (lys-asp-glu-leu) endoplasmic reticulum protein retention receptor 1, SYMPK - symplekin, AP3M2 - adaptor-related protein complex 3, mu 2 subunit, STARD3 - star-related lipid transfer (start) domain containing 3, PDIA4 - protein disulfide isomerase family a, member 4, GDI1 - gdp dissociation inhibitor 1, ABCA1 - atp-binding cassette, sub-family a (abc1), member 1, VPS37A - vacuolar …
GO:0051252	regulation of RNA metabolic process	4.71e-08	1.1e-05	1.14	5590	1086	2970	656	[ZNF341 - zinc finger protein 341, PCGF5 - polycomb group ring finger 5, PRRX1 - paired related homeobox 1, TADA1 - transcriptional adaptor 1, MSTN - myostatin, NCOA5 - nuclear receptor coactivator 5, CBX1 - chromobox homolog 1, CARD11 - caspase recruitment domain family, member 11, NCOR2 - nuclear receptor corepressor 2, RNF14 - ring finger protein 14, LZTR1 - leucine-zipper-like transcription r…
GO:0006810	transport	4.95e-08	1.14e-05	1.12	5590	1405	2970	833	[AFG3L2 - afg3 atpase family member 3-like 2 (s. cerevisiae), KDELR1 - kdel (lys-asp-glu-leu) endoplasmic reticulum protein retention receptor 1, SYMPK - symplekin, AP3M2 - adaptor-related protein complex 3, mu 2 subunit, STARD3 - star-related lipid transfer (start) domain containing 3, LRRC16A - leucine rich repeat containing 16a, GDI1 - gdp dissociation inhibitor 1, ABCA1 - atp-binding cassette…
GO:0051171	regulation of nitrogen compound metabolic process	5.31e-08	1.17e-05	1.1	5590	1748	2970	1021	[PRRX1 - paired related homeobox 1, SYMPK - symplekin, TADA1 - transcriptional adaptor 1, MSTN - myostatin, CBX1 - chromobox homolog 1, ABAT - 4-aminobutyrate aminotransferase, ABCA1 - atp-binding cassette, sub-family a (abc1), member 1, LZTR1 - leucine-zipper-like transcription regulator 1, GCK - glucokinase (hexokinase 4), KAT2A - k(lysine) acetyltransferase 2a, PLK1 - polo-like kinase 1, BRD8 …
GO:0051128	regulation of cellular component organization	5.3e-08	1.19e-05	1.16	5590	873	2970	536	[BMP2K - bmp2 inducible kinase, PRRX1 - paired related homeobox 1, LIG4 - ligase iv, dna, atp-dependent, LRRC16A - leucine rich repeat containing 16a, GDI1 - gdp dissociation inhibitor 1, LIMK1 - lim domain kinase 1, ABCA1 - atp-binding cassette, sub-family a (abc1), member 1, SPOCK1 - sparc/osteonectin, cwcv and kazal-like domains proteoglycan (testican) 1, DOCK5 - dedicator of cytokinesis 5, PL…
GO:0042886	amide transport	5.95e-08	1.27e-05	1.23	5590	440	2970	287	[CHMP4C - charged multivesicular body protein 4c, KDELR1 - kdel (lys-asp-glu-leu) endoplasmic reticulum protein retention receptor 1, KIFAP3 - kinesin-associated protein 3, AP3M2 - adaptor-related protein complex 3, mu 2 subunit, SPIRE1 - spire actin nucleation factor 1, PDIA4 - protein disulfide isomerase family a, member 4, TRAK1 - trafficking protein, kinesin binding 1, GDI1 - gdp dissociation…
GO:0051254	positive regulation of RNA metabolic process	5.94e-08	1.29e-05	1.21	5590	505	2970	325	[CCNK - cyclin k, PCGF5 - polycomb group ring finger 5, YAF2 - yy1 associated factor 2, NCBP1 - nuclear cap binding protein subunit 1, 80kda, MAPRE3 - microtubule-associated protein, rp/eb family, member 3, HSF2 - heat shock transcription factor 2, PRRX1 - paired related homeobox 1, DHX33 - deah (asp-glu-ala-his) box polypeptide 33, MSTN - myostatin, RFX2 - regulatory factor x, 2 (influences hla …
GO:0009653	anatomical structure morphogenesis	6.18e-08	1.29e-05	1.21	5590	512	2970	329	[AFG3L2 - afg3 atpase family member 3-like 2 (s. cerevisiae), TBC1D20 - tbc1 domain family, member 20, PRRX1 - paired related homeobox 1, ABLIM1 - actin binding lim protein 1, TRAK1 - trafficking protein, kinesin binding 1, HES1 - hairy and enhancer of split 1, (drosophila), PLXNB1 - plexin b1, NRP1 - neuropilin 1, NRP2 - neuropilin 2, BCOR - bcl6 corepressor, EP300 - e1a binding protein p300, LZ…
GO:0051234	establishment of localization	7.17e-08	1.47e-05	1.11	5590	1436	2970	849	[AFG3L2 - afg3 atpase family member 3-like 2 (s. cerevisiae), SYMPK - symplekin, KDELR1 - kdel (lys-asp-glu-leu) endoplasmic reticulum protein retention receptor 1, AP3M2 - adaptor-related protein complex 3, mu 2 subunit, STARD3 - star-related lipid transfer (start) domain containing 3, LRRC16A - leucine rich repeat containing 16a, GDI1 - gdp dissociation inhibitor 1, ABCA1 - atp-binding cassette…
GO:0043436	oxoacid metabolic process	1.04e-07	2.06e-05	1.24	5590	389	2970	256	[ELOVL2 - elovl fatty acid elongase 2, GFPT1 - glutamine--fructose-6-phosphate transaminase 1, MCCC1 - methylcrotonoyl-coa carboxylase 1 (alpha), HSD17B4 - hydroxysteroid (17-beta) dehydrogenase 4, SCD5 - stearoyl-coa desaturase 5, SUCLG2 - succinate-coa ligase, gdp-forming, beta subunit, BCKDK - branched chain ketoacid dehydrogenase kinase, SUCLG1 - succinate-coa ligase, alpha subunit, ABAT - 4-…
GO:0006357	regulation of transcription from RNA polymerase II promoter	1.03e-07	2.07e-05	1.18	5590	635	2970	399	[PCGF5 - polycomb group ring finger 5, PRRX1 - paired related homeobox 1, TADA1 - transcriptional adaptor 1, NCOR2 - nuclear receptor corepressor 2, RNF14 - ring finger protein 14, SPI1 - spleen focus forming virus (sffv) proviral integration oncogene, KAT2A - k(lysine) acetyltransferase 2a, BRD8 - bromodomain containing 8, SP2 - sp2 transcription factor, PLK1 - polo-like kinase 1, CHD7 - chromod…
GO:0010604	positive regulation of macromolecule metabolic process	1.12e-07	2.19e-05	1.14	5590	1024	2970	619	[PCGF5 - polycomb group ring finger 5, SYMPK - symplekin, PRRX1 - paired related homeobox 1, MSTN - myostatin, MAP3K8 - mitogen-activated protein kinase kinase kinase 8, PRR16 - proline rich 16, CARD11 - caspase recruitment domain family, member 11, NCOR2 - nuclear receptor corepressor 2, RNF14 - ring finger protein 14, SPI1 - spleen focus forming virus (sffv) proviral integration oncogene, CARTP…
GO:2000112	regulation of cellular macromolecule biosynthetic process	1.27e-07	2.44e-05	1.13	5590	1168	2970	699	[PCGF5 - polycomb group ring finger 5, ZNF341 - zinc finger protein 341, PRRX1 - paired related homeobox 1, TADA1 - transcriptional adaptor 1, MSTN - myostatin, NCOA5 - nuclear receptor coactivator 5, PRR16 - proline rich 16, CBX1 - chromobox homolog 1, CARD11 - caspase recruitment domain family, member 11, NCOR2 - nuclear receptor corepressor 2, RNF14 - ring finger protein 14, LZTR1 - leucine-zi…
GO:0051960	regulation of nervous system development	1.35e-07	2.54e-05	1.26	5590	319	2970	214	[ITM2C - integral membrane protein 2c, PRRX1 - paired related homeobox 1, LIG4 - ligase iv, dna, atp-dependent, TRAK1 - trafficking protein, kinesin binding 1, GDI1 - gdp dissociation inhibitor 1, LIMK1 - lim domain kinase 1, SPOCK1 - sparc/osteonectin, cwcv and kazal-like domains proteoglycan (testican) 1, HES1 - hairy and enhancer of split 1, (drosophila), PLXNB1 - plexin b1, PLXNA3 - plexin a3…
GO:0048522	positive regulation of cellular process	1.56e-07	2.91e-05	1.1	5590	1703	2970	993	[BMP2K - bmp2 inducible kinase, PRRX1 - paired related homeobox 1, SYMPK - symplekin, MSTN - myostatin, LRRC16A - leucine rich repeat containing 16a, GDI1 - gdp dissociation inhibitor 1, ABAT - 4-aminobutyrate aminotransferase, ABCA1 - atp-binding cassette, sub-family a (abc1), member 1, DOCK5 - dedicator of cytokinesis 5, PLXNA3 - plexin a3, PLXNB1 - plexin b1, SERINC3 - serine incorporator 3, A…
GO:0031325	positive regulation of cellular metabolic process	1.67e-07	3.06e-05	1.13	5590	1042	2970	628	[PCGF5 - polycomb group ring finger 5, SYMPK - symplekin, PRRX1 - paired related homeobox 1, MSTN - myostatin, MAP3K8 - mitogen-activated protein kinase kinase kinase 8, PRR16 - proline rich 16, ABAT - 4-aminobutyrate aminotransferase, ABCA1 - atp-binding cassette, sub-family a (abc1), member 1, CARD11 - caspase recruitment domain family, member 11, NCOR2 - nuclear receptor corepressor 2, RNF14 -…
GO:1903508	positive regulation of nucleic acid-templated transcription	1.85e-07	3.1e-05	1.21	5590	483	2970	310	[CCNK - cyclin k, PCGF5 - polycomb group ring finger 5, YAF2 - yy1 associated factor 2, MAPRE3 - microtubule-associated protein, rp/eb family, member 3, HSF2 - heat shock transcription factor 2, PRRX1 - paired related homeobox 1, DHX33 - deah (asp-glu-ala-his) box polypeptide 33, MSTN - myostatin, RFX2 - regulatory factor x, 2 (influences hla class ii expression), RFX3 - regulatory factor x, 3 (i…
GO:0016570	histone modification	1.89e-07	3.11e-05	1.47	5590	97	2970	76	[PRKAA2 - protein kinase, amp-activated, alpha 2 catalytic subunit, PCGF5 - polycomb group ring finger 5, PRKAA1 - protein kinase, amp-activated, alpha 1 catalytic subunit, TADA1 - transcriptional adaptor 1, EHMT1 - euchromatic histone-lysine n-methyltransferase 1, RYBP - ring1 and yy1 binding protein, WHSC1L1 - wolf-hirschhorn syndrome candidate 1-like 1, ELK4 - elk4, ets-domain protein (srf acc…
GO:0051179	localization	1.79e-07	3.12e-05	1.1	5590	1605	2970	939	[AFG3L2 - afg3 atpase family member 3-like 2 (s. cerevisiae), KDELR1 - kdel (lys-asp-glu-leu) endoplasmic reticulum protein retention receptor 1, SYMPK - symplekin, AP3M2 - adaptor-related protein complex 3, mu 2 subunit, STARD3 - star-related lipid transfer (start) domain containing 3, LRRC16A - leucine rich repeat containing 16a, GDI1 - gdp dissociation inhibitor 1, ABCA1 - atp-binding cassette…
GO:0010468	regulation of gene expression	1.74e-07	3.13e-05	1.12	5590	1285	2970	763	[ZNF341 - zinc finger protein 341, PCGF5 - polycomb group ring finger 5, GFPT1 - glutamine--fructose-6-phosphate transaminase 1, PRRX1 - paired related homeobox 1, TADA1 - transcriptional adaptor 1, MSTN - myostatin, NCOA5 - nuclear receptor coactivator 5, PRR16 - proline rich 16, CBX1 - chromobox homolog 1, CARD11 - caspase recruitment domain family, member 11, NCOR2 - nuclear receptor corepress…
GO:0045893	positive regulation of transcription, DNA-templated	1.85e-07	3.14e-05	1.21	5590	483	2970	310	[CCNK - cyclin k, PCGF5 - polycomb group ring finger 5, YAF2 - yy1 associated factor 2, MAPRE3 - microtubule-associated protein, rp/eb family, member 3, HSF2 - heat shock transcription factor 2, PRRX1 - paired related homeobox 1, DHX33 - deah (asp-glu-ala-his) box polypeptide 33, MSTN - myostatin, RFX2 - regulatory factor x, 2 (influences hla class ii expression), RFX3 - regulatory factor x, 3 (i…
GO:0006082	organic acid metabolic process	1.78e-07	3.16e-05	1.23	5590	394	2970	258	[ELOVL2 - elovl fatty acid elongase 2, GFPT1 - glutamine--fructose-6-phosphate transaminase 1, MCCC1 - methylcrotonoyl-coa carboxylase 1 (alpha), HSD17B4 - hydroxysteroid (17-beta) dehydrogenase 4, SCD5 - stearoyl-coa desaturase 5, SUCLG2 - succinate-coa ligase, gdp-forming, beta subunit, LRRC16A - leucine rich repeat containing 16a, BCKDK - branched chain ketoacid dehydrogenase kinase, SUCLG1 - …
GO:1902680	positive regulation of RNA biosynthetic process	1.85e-07	3.19e-05	1.21	5590	483	2970	310	[CCNK - cyclin k, PCGF5 - polycomb group ring finger 5, YAF2 - yy1 associated factor 2, MAPRE3 - microtubule-associated protein, rp/eb family, member 3, HSF2 - heat shock transcription factor 2, PRRX1 - paired related homeobox 1, DHX33 - deah (asp-glu-ala-his) box polypeptide 33, MSTN - myostatin, RFX2 - regulatory factor x, 2 (influences hla class ii expression), RFX3 - regulatory factor x, 3 (i…
GO:0048856	anatomical structure development	2.2e-07	3.57e-05	1.13	5590	1151	2970	688	[AFG3L2 - afg3 atpase family member 3-like 2 (s. cerevisiae), PRRX1 - paired related homeobox 1, MSTN - myostatin, LIG4 - ligase iv, dna, atp-dependent, LIMK1 - lim domain kinase 1, ABAT - 4-aminobutyrate aminotransferase, SPOCK1 - sparc/osteonectin, cwcv and kazal-like domains proteoglycan (testican) 1, PLXNA3 - plexin a3, SPG7 - spastic paraplegia 7 (pure and complicated autosomal recessive), A…
GO:0009893	positive regulation of metabolic process	2.26e-07	3.62e-05	1.13	5590	1117	2970	669	[PCGF5 - polycomb group ring finger 5, PRRX1 - paired related homeobox 1, SYMPK - symplekin, MSTN - myostatin, MAP3K8 - mitogen-activated protein kinase kinase kinase 8, PRR16 - proline rich 16, ABAT - 4-aminobutyrate aminotransferase, ABCA1 - atp-binding cassette, sub-family a (abc1), member 1, CARD11 - caspase recruitment domain family, member 11, NCOR2 - nuclear receptor corepressor 2, ABL2 - …
GO:0051173	positive regulation of nitrogen compound metabolic process	2.34e-07	3.7e-05	1.14	5590	990	2970	598	[PCGF5 - polycomb group ring finger 5, SYMPK - symplekin, PRRX1 - paired related homeobox 1, MSTN - myostatin, MAP3K8 - mitogen-activated protein kinase kinase kinase 8, PRR16 - proline rich 16, ABAT - 4-aminobutyrate aminotransferase, ABCA1 - atp-binding cassette, sub-family a (abc1), member 1, CARD11 - caspase recruitment domain family, member 11, NCOR2 - nuclear receptor corepressor 2, RNF14 -…
GO:0009889	regulation of biosynthetic process	2.59e-07	4.04e-05	1.12	5590	1298	2970	769	[PRRX1 - paired related homeobox 1, TADA1 - transcriptional adaptor 1, MSTN - myostatin, CBX1 - chromobox homolog 1, ABCA1 - atp-binding cassette, sub-family a (abc1), member 1, LZTR1 - leucine-zipper-like transcription regulator 1, GCHFR - gtp cyclohydrolase i feedback regulator, ACADL - acyl-coa dehydrogenase, long chain, GCK - glucokinase (hexokinase 4), KAT2A - k(lysine) acetyltransferase 2a,…
GO:0019219	regulation of nucleobase-containing compound metabolic process	3.08e-07	4.74e-05	1.12	5590	1205	2970	717	[ZNF341 - zinc finger protein 341, PCGF5 - polycomb group ring finger 5, PRRX1 - paired related homeobox 1, TADA1 - transcriptional adaptor 1, MSTN - myostatin, NCOA5 - nuclear receptor coactivator 5, CBX1 - chromobox homolog 1, ABCA1 - atp-binding cassette, sub-family a (abc1), member 1, CARD11 - caspase recruitment domain family, member 11, NCOR2 - nuclear receptor corepressor 2, RNF14 - ring f…
GO:0048518	positive regulation of biological process	3.58e-07	5.45e-05	1.09	5590	1901	2970	1098	[BMP2K - bmp2 inducible kinase, PRRX1 - paired related homeobox 1, SYMPK - symplekin, MSTN - myostatin, LRRC16A - leucine rich repeat containing 16a, GDI1 - gdp dissociation inhibitor 1, ABAT - 4-aminobutyrate aminotransferase, ABCA1 - atp-binding cassette, sub-family a (abc1), member 1, DOCK5 - dedicator of cytokinesis 5, SERINC3 - serine incorporator 3, PLXNB1 - plexin b1, PLXNA3 - plexin a3, A…
GO:1903506	regulation of nucleic acid-templated transcription	4.01e-07	6.01e-05	1.13	5590	1032	2970	620	[ZNF341 - zinc finger protein 341, PCGF5 - polycomb group ring finger 5, PRRX1 - paired related homeobox 1, TADA1 - transcriptional adaptor 1, MSTN - myostatin, NCOA5 - nuclear receptor coactivator 5, CBX1 - chromobox homolog 1, CARD11 - caspase recruitment domain family, member 11, NCOR2 - nuclear receptor corepressor 2, RNF14 - ring finger protein 14, LZTR1 - leucine-zipper-like transcription r…
GO:0045664	regulation of neuron differentiation	4.21e-07	6.23e-05	1.29	5590	247	2970	169	[LRIG2 - leucine-rich repeats and immunoglobulin-like domains 2, RELN - reelin, PDLIM5 - pdz and lim domain 5, ITM2C - integral membrane protein 2c, PRRX1 - paired related homeobox 1, PAX6 - paired box 6, TRAK1 - trafficking protein, kinesin binding 1, LIMK1 - lim domain kinase 1, GDI1 - gdp dissociation inhibitor 1, SPOCK1 - sparc/osteonectin, cwcv and kazal-like domains proteoglycan (testican) …
GO:0007165	signal transduction	4.29e-07	6.28e-05	1.11	5590	1446	2970	849	[GFPT1 - glutamine--fructose-6-phosphate transaminase 1, GFRA1 - gdnf family receptor alpha 1, AGAP3 - arfgap with gtpase domain, ankyrin repeat and ph domain 3, MSTN - myostatin, GDI1 - gdp dissociation inhibitor 1, ABCA1 - atp-binding cassette, sub-family a (abc1), member 1, GEM - gtp binding protein overexpressed in skeletal muscle, DOCK5 - dedicator of cytokinesis 5, PLXNA3 - plexin a3, PLXNB…
GO:0045944	positive regulation of transcription from RNA polymerase II promoter	4.34e-07	6.28e-05	1.23	5590	378	2970	247	[CCNK - cyclin k, PCGF5 - polycomb group ring finger 5, HSF2 - heat shock transcription factor 2, PRRX1 - paired related homeobox 1, RFX2 - regulatory factor x, 2 (influences hla class ii expression), RFX3 - regulatory factor x, 3 (influences hla class ii expression), ELK4 - elk4, ets-domain protein (srf accessory protein 1), HES1 - hairy and enhancer of split 1, (drosophila), SCAP - srebf chaper…
GO:0044271	cellular nitrogen compound biosynthetic process	4.41e-07	6.3e-05	1.14	5590	911	2970	552	[ZNF341 - zinc finger protein 341, PCGF5 - polycomb group ring finger 5, GFPT1 - glutamine--fructose-6-phosphate transaminase 1, SYMPK - symplekin, TADA1 - transcriptional adaptor 1, LIG4 - ligase iv, dna, atp-dependent, NCOA5 - nuclear receptor coactivator 5, GFM2 - g elongation factor, mitochondrial 2, ABCF1 - atp-binding cassette, sub-family f (gcn20), member 1, NCOR2 - nuclear receptor corepr…
GO:0010557	positive regulation of macromolecule biosynthetic process	4.79e-07	6.75e-05	1.19	5590	559	2970	352	[CCNK - cyclin k, PCGF5 - polycomb group ring finger 5, RFC4 - replication factor c (activator 1) 4, 37kda, YAF2 - yy1 associated factor 2, MAPRE3 - microtubule-associated protein, rp/eb family, member 3, HSF2 - heat shock transcription factor 2, RFC3 - replication factor c (activator 1) 3, 38kda, PRRX1 - paired related homeobox 1, DHX33 - deah (asp-glu-ala-his) box polypeptide 33, MSTN - myostat…
GO:0051130	positive regulation of cellular component organization	5.32e-07	7.42e-05	1.21	5590	435	2970	280	[LIG4 - ligase iv, dna, atp-dependent, SPIRE1 - spire actin nucleation factor 1, TRAK1 - trafficking protein, kinesin binding 1, LIMK1 - lim domain kinase 1, GDI1 - gdp dissociation inhibitor 1, LRRC16A - leucine rich repeat containing 16a, STARD7 - star-related lipid transfer (start) domain containing 7, DOCK5 - dedicator of cytokinesis 5, HES1 - hairy and enhancer of split 1, (drosophila), PLXN…
GO:0003002	regionalization	6.84e-07	9.42e-05	1.49	5590	82	2970	65	[RELN - reelin, TTC21B - tetratricopeptide repeat domain 21b, PAX2 - paired box 2, PAX6 - paired box 6, TCF15 - transcription factor 15 (basic helix-loop-helix), PBX2 - pre-b-cell leukemia homeobox 2, PBX3 - pre-b-cell leukemia homeobox 3, PBX1 - pre-b-cell leukemia homeobox 1, WNT7B - wingless-type mmtv integration site family, member 7b, EP300 - e1a binding protein p300, DYNC2H1 - dynein, cytop…
GO:2001141	regulation of RNA biosynthetic process	7.23e-07	9.84e-05	1.13	5590	1035	2970	620	[PCGF5 - polycomb group ring finger 5, ZNF341 - zinc finger protein 341, PRRX1 - paired related homeobox 1, TADA1 - transcriptional adaptor 1, MSTN - myostatin, NCOA5 - nuclear receptor coactivator 5, CBX1 - chromobox homolog 1, CARD11 - caspase recruitment domain family, member 11, NCOR2 - nuclear receptor corepressor 2, RNF14 - ring finger protein 14, LZTR1 - leucine-zipper-like transcription r…
GO:0006367	transcription initiation from RNA polymerase II promoter	8.08e-07	0.000109	1.57	5590	60	2970	50	[MED27 - mediator complex subunit 27, MED6 - mediator complex subunit 6, MED7 - mediator complex subunit 7, MED23 - mediator complex subunit 23, WWTR1 - ww domain containing transcription regulator 1, CTGF - connective tissue growth factor, GTF2E2 - general transcription factor iie, polypeptide 2, beta 34kda, NOTCH1 - notch 1, GTF2B - general transcription factor iib, GTF2A1 - general transcripti…
GO:0016043	cellular component organization	8.3e-07	0.00011	1.09	5590	1682	2970	976	[AFG3L2 - afg3 atpase family member 3-like 2 (s. cerevisiae), TADA1 - transcriptional adaptor 1, STARD3 - star-related lipid transfer (start) domain containing 3, LRRC16A - leucine rich repeat containing 16a, GDI1 - gdp dissociation inhibitor 1, ABCA1 - atp-binding cassette, sub-family a (abc1), member 1, GEM - gtp binding protein overexpressed in skeletal muscle, RAB3IP - rab3a interacting prote…
GO:0006355	regulation of transcription, DNA-templated	8.38e-07	0.00011	1.13	5590	1025	2970	614	[ZNF341 - zinc finger protein 341, PCGF5 - polycomb group ring finger 5, PRRX1 - paired related homeobox 1, TADA1 - transcriptional adaptor 1, MSTN - myostatin, NCOA5 - nuclear receptor coactivator 5, CBX1 - chromobox homolog 1, CARD11 - caspase recruitment domain family, member 11, NCOR2 - nuclear receptor corepressor 2, RNF14 - ring finger protein 14, LZTR1 - leucine-zipper-like transcription r…
GO:0019752	carboxylic acid metabolic process	8.53e-07	0.000111	1.24	5590	341	2970	224	[ELOVL2 - elovl fatty acid elongase 2, GFPT1 - glutamine--fructose-6-phosphate transaminase 1, MCCC1 - methylcrotonoyl-coa carboxylase 1 (alpha), HSD17B4 - hydroxysteroid (17-beta) dehydrogenase 4, SCD5 - stearoyl-coa desaturase 5, SUCLG2 - succinate-coa ligase, gdp-forming, beta subunit, BCKDK - branched chain ketoacid dehydrogenase kinase, SUCLG1 - succinate-coa ligase, alpha subunit, ABAT - 4-…
GO:0060341	regulation of cellular localization	8.99e-07	0.000116	1.24	5590	331	2970	218	[TBC1D20 - tbc1 domain family, member 20, GDI1 - gdp dissociation inhibitor 1, STARD7 - star-related lipid transfer (start) domain containing 7, HES1 - hairy and enhancer of split 1, (drosophila), DHRS7C - dehydrogenase/reductase (sdr family) member 7c, IQGAP1 - iq motif containing gtpase activating protein 1, RDX - radixin, REEP2 - receptor accessory protein 2, KAT2A - k(lysine) acetyltransferas…
GO:0044248	cellular catabolic process	9.12e-07	0.000116	1.19	5590	492	2970	312	[CHMP4C - charged multivesicular body protein 4c, NCBP1 - nuclear cap binding protein subunit 1, 80kda, MCCC1 - methylcrotonoyl-coa carboxylase 1 (alpha), HSD17B4 - hydroxysteroid (17-beta) dehydrogenase 4, MAEA - macrophage erythroblast attacher, BCKDK - branched chain ketoacid dehydrogenase kinase, ABAT - 4-aminobutyrate aminotransferase, VPS37A - vacuolar protein sorting 37 homolog a (s. cerev…
GO:0031326	regulation of cellular biosynthetic process	1.01e-06	0.000127	1.11	5590	1273	2970	751	[PCGF5 - polycomb group ring finger 5, ZNF341 - zinc finger protein 341, PRRX1 - paired related homeobox 1, TADA1 - transcriptional adaptor 1, MSTN - myostatin, NCOA5 - nuclear receptor coactivator 5, PRR16 - proline rich 16, CBX1 - chromobox homolog 1, ABCA1 - atp-binding cassette, sub-family a (abc1), member 1, CARD11 - caspase recruitment domain family, member 11, NCOR2 - nuclear receptor core…
GO:0050767	regulation of neurogenesis	1.04e-06	0.000129	1.25	5590	296	2970	197	[ITM2C - integral membrane protein 2c, PRRX1 - paired related homeobox 1, LIG4 - ligase iv, dna, atp-dependent, TRAK1 - trafficking protein, kinesin binding 1, GDI1 - gdp dissociation inhibitor 1, LIMK1 - lim domain kinase 1, SPOCK1 - sparc/osteonectin, cwcv and kazal-like domains proteoglycan (testican) 1, HES1 - hairy and enhancer of split 1, (drosophila), PLXNB1 - plexin b1, PLXNA3 - plexin a3…
GO:0000209	protein polyubiquitination	1.09e-06	0.000135	1.43	5590	104	2970	79	[PSMD6 - proteasome (prosome, macropain) 26s subunit, non-atpase, 6, KLHL42 - kelch-like family member 42, ANKIB1 - ankyrin repeat and ibr domain containing 1, SPSB1 - spla/ryanodine receptor domain and socs box containing 1, FBXW5 - f-box and wd repeat domain containing 5, RNF14 - ring finger protein 14, MARCH8 - membrane-associated ring finger (c3hc4) 8, e3 ubiquitin protein ligase, WSB1 - wd r…
GO:0007610	behavior	1.2e-06	0.000146	1.33	5590	174	2970	123	[OPRK1 - opioid receptor, kappa 1, RELN - reelin, ITGA8 - integrin, alpha 8, TCF15 - transcription factor 15 (basic helix-loop-helix), ABAT - 4-aminobutyrate aminotransferase, PBX3 - pre-b-cell leukemia homeobox 3, PSEN1 - presenilin 1, CARTPT - cart prepropeptide, PLCB1 - phospholipase c, beta 1 (phosphoinositide-specific), APBA1 - amyloid beta (a4) precursor protein-binding, family a, member 1,…
GO:0043632	modification-dependent macromolecule catabolic process	1.25e-06	0.000151	1.38	5590	134	2970	98	[PSMD6 - proteasome (prosome, macropain) 26s subunit, non-atpase, 6, RMND5A - required for meiotic nuclear division 5 homolog a (s. cerevisiae), KCTD10 - potassium channel tetramerization domain containing 10, MAEA - macrophage erythroblast attacher, KCTD5 - potassium channel tetramerization domain containing 5, ERLIN1 - er lipid raft associated 1, VPS37A - vacuolar protein sorting 37 homolog a (…
GO:0032502	developmental process	1.34e-06	0.000158	1.09	5590	1663	2970	964	[AFG3L2 - afg3 atpase family member 3-like 2 (s. cerevisiae), PRRX1 - paired related homeobox 1, KDELR1 - kdel (lys-asp-glu-leu) endoplasmic reticulum protein retention receptor 1, MSTN - myostatin, ABAT - 4-aminobutyrate aminotransferase, PLXNA3 - plexin a3, PLXNB1 - plexin b1, ABR - active bcr-related, LZTR1 - leucine-zipper-like transcription regulator 1, PHC3 - polyhomeotic homolog 3 (drosoph…
GO:0010646	regulation of cell communication	1.33e-06	0.000159	1.12	5590	1148	2970	681	[BMP2K - bmp2 inducible kinase, PRRX1 - paired related homeobox 1, MSTN - myostatin, DAPK2 - death-associated protein kinase 2, NCOA5 - nuclear receptor coactivator 5, MAP3K8 - mitogen-activated protein kinase kinase kinase 8, GDI1 - gdp dissociation inhibitor 1, ABAT - 4-aminobutyrate aminotransferase, TMEM101 - transmembrane protein 101, ABCA1 - atp-binding cassette, sub-family a (abc1), member…
GO:0051338	regulation of transferase activity	1.42e-06	0.000166	1.22	5590	380	2970	246	[CCNK - cyclin k, RFC4 - replication factor c (activator 1) 4, 37kda, MAPRE3 - microtubule-associated protein, rp/eb family, member 3, RFC3 - replication factor c (activator 1) 3, 38kda, MAP3K8 - mitogen-activated protein kinase kinase kinase 8, MSTN - myostatin, LIMK1 - lim domain kinase 1, IQGAP1 - iq motif containing gtpase activating protein 1, PAK4 - p21 protein (cdc42/rac)-activated kinase …
GO:0032879	regulation of localization	1.53e-06	0.000177	1.13	5590	960	2970	576	[BMP2K - bmp2 inducible kinase, DAPK2 - death-associated protein kinase 2, LRRC16A - leucine rich repeat containing 16a, GDI1 - gdp dissociation inhibitor 1, ABAT - 4-aminobutyrate aminotransferase, ABCA1 - atp-binding cassette, sub-family a (abc1), member 1, GEM - gtp binding protein overexpressed in skeletal muscle, DOCK5 - dedicator of cytokinesis 5, PLXNA3 - plexin a3, ABL2 - c-abl oncogene 2…
GO:0023051	regulation of signaling	1.58e-06	0.000182	1.11	5590	1167	2970	691	[BMP2K - bmp2 inducible kinase, PRRX1 - paired related homeobox 1, MSTN - myostatin, DAPK2 - death-associated protein kinase 2, MAP3K8 - mitogen-activated protein kinase kinase kinase 8, NCOA5 - nuclear receptor coactivator 5, GDI1 - gdp dissociation inhibitor 1, ABAT - 4-aminobutyrate aminotransferase, TMEM101 - transmembrane protein 101, ABCA1 - atp-binding cassette, sub-family a (abc1), member…
GO:0044265	cellular macromolecule catabolic process	1.82e-06	0.000207	1.3	5590	201	2970	139	[PSMD6 - proteasome (prosome, macropain) 26s subunit, non-atpase, 6, NCBP1 - nuclear cap binding protein subunit 1, 80kda, RMND5A - required for meiotic nuclear division 5 homolog a (s. cerevisiae), KCTD10 - potassium channel tetramerization domain containing 10, MAEA - macrophage erythroblast attacher, ERLIN1 - er lipid raft associated 1, KCTD5 - potassium channel tetramerization domain containi…
GO:0006511	ubiquitin-dependent protein catabolic process	1.94e-06	0.000218	1.38	5590	130	2970	95	[PSMD6 - proteasome (prosome, macropain) 26s subunit, non-atpase, 6, KLHL42 - kelch-like family member 42, RMND5A - required for meiotic nuclear division 5 homolog a (s. cerevisiae), KCTD10 - potassium channel tetramerization domain containing 10, BTBD3 - btb (poz) domain containing 3, MAEA - macrophage erythroblast attacher, RFWD2 - ring finger and wd repeat domain 2, e3 ubiquitin protein ligase…
GO:0032268	regulation of cellular protein metabolic process	2.07e-06	0.00023	1.14	5590	849	2970	513	[SYMPK - symplekin, MSTN - myostatin, MAP3K8 - mitogen-activated protein kinase kinase kinase 8, PRR16 - proline rich 16, LIMK1 - lim domain kinase 1, SPOCK1 - sparc/osteonectin, cwcv and kazal-like domains proteoglycan (testican) 1, NCOR2 - nuclear receptor corepressor 2, PPP4R4 - protein phosphatase 4, regulatory subunit 4, RNF14 - ring finger protein 14, SPI1 - spleen focus forming virus (sffv…
GO:0008380	RNA splicing	2.34e-06	0.000258	1.48	5590	79	2970	62	[HNRNPUL1 - heterogeneous nuclear ribonucleoprotein u-like 1, CSTF1 - cleavage stimulation factor, 3' pre-rna, subunit 1, 50kda, NCBP1 - nuclear cap binding protein subunit 1, 80kda, LUC7L3 - luc7-like 3 (s. cerevisiae), DBR1 - debranching rna lariats 1, DDX1 - dead (asp-glu-ala-asp) box helicase 1, SYMPK - symplekin, DDX25 - dead (asp-glu-ala-asp) box helicase 25, PTBP3 - polypyrimidine tract bi…
GO:0019941	modification-dependent protein catabolic process	2.45e-06	0.000265	1.37	5590	132	2970	96	[PSMD6 - proteasome (prosome, macropain) 26s subunit, non-atpase, 6, KLHL42 - kelch-like family member 42, RMND5A - required for meiotic nuclear division 5 homolog a (s. cerevisiae), KCTD10 - potassium channel tetramerization domain containing 10, BTBD3 - btb (poz) domain containing 3, MAEA - macrophage erythroblast attacher, RFWD2 - ring finger and wd repeat domain 2, e3 ubiquitin protein ligase…
GO:0030163	protein catabolic process	2.45e-06	0.000268	1.37	5590	132	2970	96	[PSMD6 - proteasome (prosome, macropain) 26s subunit, non-atpase, 6, AP2A1 - adaptor-related protein complex 2, alpha 1 subunit, RMND5A - required for meiotic nuclear division 5 homolog a (s. cerevisiae), KLHL42 - kelch-like family member 42, KCTD10 - potassium channel tetramerization domain containing 10, BTBD3 - btb (poz) domain containing 3, MAEA - macrophage erythroblast attacher, RFWD2 - rin…
GO:0010628	positive regulation of gene expression	2.51e-06	0.00027	1.17	5590	597	2970	370	[CCNK - cyclin k, PCGF5 - polycomb group ring finger 5, YAF2 - yy1 associated factor 2, NCBP1 - nuclear cap binding protein subunit 1, 80kda, MAPRE3 - microtubule-associated protein, rp/eb family, member 3, HSF2 - heat shock transcription factor 2, PRRX1 - paired related homeobox 1, DHX33 - deah (asp-glu-ala-his) box polypeptide 33, MSTN - myostatin, PRR16 - proline rich 16, RFX2 - regulatory fac…
GO:0071840	cellular component organization or biogenesis	2.53e-06	0.00027	1.09	5590	1691	2970	977	[AFG3L2 - afg3 atpase family member 3-like 2 (s. cerevisiae), TADA1 - transcriptional adaptor 1, STARD3 - star-related lipid transfer (start) domain containing 3, LRRC16A - leucine rich repeat containing 16a, GDI1 - gdp dissociation inhibitor 1, ABCA1 - atp-binding cassette, sub-family a (abc1), member 1, GEM - gtp binding protein overexpressed in skeletal muscle, PLXNB1 - plexin b1, RAB3IP - rab…
GO:0048731	system development	2.69e-06	0.000284	1.26	5590	255	2970	171	[RELN - reelin, TRIM3 - tripartite motif containing 3, PAX2 - paired box 2, LIG4 - ligase iv, dna, atp-dependent, PAX6 - paired box 6, FLT4 - fms-related tyrosine kinase 4, LIMK1 - lim domain kinase 1, SPOCK1 - sparc/osteonectin, cwcv and kazal-like domains proteoglycan (testican) 1, TCF21 - transcription factor 21, GSS - glutathione synthetase, HES1 - hairy and enhancer of split 1, (drosophila),…
GO:0009887	animal organ morphogenesis	2.75e-06	0.000288	1.31	5590	179	2970	125	[PAX2 - paired box 2, PRRX1 - paired related homeobox 1, PAX6 - paired box 6, HTRA1 - htra serine peptidase 1, TCF15 - transcription factor 15 (basic helix-loop-helix), STK40 - serine/threonine kinase 40, ABLIM1 - actin binding lim protein 1, CDH2 - cadherin 2, type 1, n-cadherin (neuronal), TCF21 - transcription factor 21, WWTR1 - ww domain containing transcription regulator 1, NRP1 - neuropilin…
GO:0000375	RNA splicing, via transesterification reactions	2.94e-06	0.000304	1.57	5590	54	2970	45	[HNRNPUL1 - heterogeneous nuclear ribonucleoprotein u-like 1, CSTF1 - cleavage stimulation factor, 3' pre-rna, subunit 1, 50kda, SNRPD1 - small nuclear ribonucleoprotein d1 polypeptide 16kda, SF3B14 - splicing factor 3b, 14 kda subunit, NCBP1 - nuclear cap binding protein subunit 1, 80kda, DDX39A - dead (asp-glu-ala-asp) box polypeptide 39a, PUF60 - poly-u binding splicing factor 60kda, DDX41 - d…
GO:0042472	inner ear morphogenesis	3.12e-06	0.00032	1.88	5590	20	2970	20	[FGFR2 - fibroblast growth factor receptor 2, ZIC1 - zic family member 1, PAX2 - paired box 2, GATA3 - gata binding protein 3, PRRX1 - paired related homeobox 1, KCNQ4 - potassium voltage-gated channel, kqt-like subfamily, member 4, FGFR1 - fibroblast growth factor receptor 1, ITGA8 - integrin, alpha 8, SOBP - sine oculis binding protein homolog (drosophila), FGF9 - fibroblast growth factor 9, CH…
GO:0071310	cellular response to organic substance	3.2e-06	0.000326	1.18	5590	488	2970	307	[MSTN - myostatin, RFX2 - regulatory factor x, 2 (influences hla class ii expression), GATSL3 - gats protein-like 3, ABCA1 - atp-binding cassette, sub-family a (abc1), member 1, NRP1 - neuropilin 1, IQGAP1 - iq motif containing gtpase activating protein 1, ABL2 - c-abl oncogene 2, non-receptor tyrosine kinase, SPI1 - spleen focus forming virus (sffv) proviral integration oncogene, PAK4 - p21 prot…
GO:0019693	ribose phosphate metabolic process	3.3e-06	0.000333	1.38	5590	123	2970	90	[UCK1 - uridine-cytidine kinase 1, CROT - carnitine o-octanoyltransferase, PGM1 - phosphoglucomutase 1, PDE7B - phosphodiesterase 7b, ATP1A2 - atpase, na+/k+ transporting, alpha 2 polypeptide, PGD - phosphogluconate dehydrogenase, ADSS - adenylosuccinate synthase, RHOQ - ras homolog family member q, PGAM2 - phosphoglycerate mutase 2 (muscle), ATP1B1 - atpase, na+/k+ transporting, beta 1 polypepti…
GO:0035556	intracellular signal transduction	3.42e-06	0.000342	1.17	5590	565	2970	351	[GFRA1 - gdnf family receptor alpha 1, DAPK2 - death-associated protein kinase 2, MAP3K8 - mitogen-activated protein kinase kinase kinase 8, GDI1 - gdp dissociation inhibitor 1, LIMK1 - lim domain kinase 1, DOCK5 - dedicator of cytokinesis 5, PLXNB1 - plexin b1, EP300 - e1a binding protein p300, ABR - active bcr-related, PAK4 - p21 protein (cdc42/rac)-activated kinase 4, RDX - radixin, HRAS - har…
GO:0019438	aromatic compound biosynthetic process	3.65e-06	0.000362	1.14	5590	834	2970	503	[ZNF341 - zinc finger protein 341, PCGF5 - polycomb group ring finger 5, GFPT1 - glutamine--fructose-6-phosphate transaminase 1, SYMPK - symplekin, TADA1 - transcriptional adaptor 1, LIG4 - ligase iv, dna, atp-dependent, NCOA5 - nuclear receptor coactivator 5, NCOR2 - nuclear receptor corepressor 2, RNF14 - ring finger protein 14, SPI1 - spleen focus forming virus (sffv) proviral integration onco…
GO:0034613	cellular protein localization	3.86e-06	0.00038	1.24	5590	293	2970	193	[HES1 - hairy and enhancer of split 1, (drosophila), RAB3IP - rab3a interacting protein, NRP1 - neuropilin 1, LIN7A - lin-7 homolog a (c. elegans), RDX - radixin, PMM1 - phosphomannomutase 1, SPO11 - spo11 meiotic protein covalently bound to dsb, REEP2 - receptor accessory protein 2, TUB - tubby bipartite transcription factor, PLK1 - polo-like kinase 1, MTX3 - metaxin 3, PIKFYVE - phosphoinositid…
GO:0009259	ribonucleotide metabolic process	4.01e-06	0.000391	1.38	5590	117	2970	86	[UCK1 - uridine-cytidine kinase 1, CROT - carnitine o-octanoyltransferase, PGM1 - phosphoglucomutase 1, PDE7B - phosphodiesterase 7b, ATP1A2 - atpase, na+/k+ transporting, alpha 2 polypeptide, ADSS - adenylosuccinate synthase, RHOQ - ras homolog family member q, PGAM2 - phosphoglycerate mutase 2 (muscle), ATP1B1 - atpase, na+/k+ transporting, beta 1 polypeptide, CARD11 - caspase recruitment domai…
GO:0010975	regulation of neuron projection development	4.21e-06	0.000401	1.29	5590	198	2970	136	[LRIG2 - leucine-rich repeats and immunoglobulin-like domains 2, RELN - reelin, PDLIM5 - pdz and lim domain 5, ITM2C - integral membrane protein 2c, PRRX1 - paired related homeobox 1, TRAK1 - trafficking protein, kinesin binding 1, LIMK1 - lim domain kinase 1, GDI1 - gdp dissociation inhibitor 1, SPOCK1 - sparc/osteonectin, cwcv and kazal-like domains proteoglycan (testican) 1, PLXNB1 - plexin b1…
GO:0018130	heterocycle biosynthetic process	4.15e-06	0.000402	1.13	5590	840	2970	506	[ZNF341 - zinc finger protein 341, PCGF5 - polycomb group ring finger 5, GFPT1 - glutamine--fructose-6-phosphate transaminase 1, SYMPK - symplekin, TADA1 - transcriptional adaptor 1, LIG4 - ligase iv, dna, atp-dependent, NCOA5 - nuclear receptor coactivator 5, NCOR2 - nuclear receptor corepressor 2, RNF14 - ring finger protein 14, SPI1 - spleen focus forming virus (sffv) proviral integration onco…
GO:0009952	anterior/posterior pattern specification	4.2e-06	0.000403	1.58	5590	50	2970	42	[NEUROD1 - neuronal differentiation 1, CRKL - v-crk avian sarcoma virus ct10 oncogene homolog-like, OSR1 - odd-skipped related 1 (drosophila), HOXB4 - homeobox b4, MYF6 - myogenic factor 6 (herculin), HIPK2 - homeodomain interacting protein kinase 2, POFUT1 - protein o-fucosyltransferase 1, ACVR2A - activin a receptor, type iia, ACVR2B - activin a receptor, type iib, HOXB6 - homeobox b6, TCF15 - …
GO:0070727	cellular macromolecule localization	4.29e-06	0.000405	1.24	5590	295	2970	194	[HES1 - hairy and enhancer of split 1, (drosophila), RAB3IP - rab3a interacting protein, NRP1 - neuropilin 1, LIN7A - lin-7 homolog a (c. elegans), RDX - radixin, PMM1 - phosphomannomutase 1, SPO11 - spo11 meiotic protein covalently bound to dsb, REEP2 - receptor accessory protein 2, TUB - tubby bipartite transcription factor, PLK1 - polo-like kinase 1, MTX3 - metaxin 3, PIKFYVE - phosphoinositid…
GO:0018209	peptidyl-serine modification	4.33e-06	0.000405	1.44	5590	89	2970	68	[PRKAA2 - protein kinase, amp-activated, alpha 2 catalytic subunit, PRKAA1 - protein kinase, amp-activated, alpha 1 catalytic subunit, AKT3 - v-akt murine thymoma viral oncogene homolog 3, NEK6 - nima-related kinase 6, DAPK2 - death-associated protein kinase 2, MTOR - mechanistic target of rapamycin (serine/threonine kinase), CAMK2G - calcium/calmodulin-dependent protein kinase ii gamma, CAMK2B -…
GO:0034641	cellular nitrogen compound metabolic process	5.15e-06	0.000475	1.1	5590	1390	2970	810	[GFPT1 - glutamine--fructose-6-phosphate transaminase 1, SYMPK - symplekin, TADA1 - transcriptional adaptor 1, LRRC16A - leucine rich repeat containing 16a, ABCF1 - atp-binding cassette, sub-family f (gcn20), member 1, PMM1 - phosphomannomutase 1, ACADL - acyl-coa dehydrogenase, long chain, GCHFR - gtp cyclohydrolase i feedback regulator, GCH1 - gtp cyclohydrolase 1, GCK - glucokinase (hexokinase…
GO:0032501	multicellular organismal process	5.12e-06	0.000476	1.11	5590	1087	2970	643	[GFPT1 - glutamine--fructose-6-phosphate transaminase 1, KDELR1 - kdel (lys-asp-glu-leu) endoplasmic reticulum protein retention receptor 1, PRRX1 - paired related homeobox 1, GGCX - gamma-glutamyl carboxylase, MSTN - myostatin, LIG4 - ligase iv, dna, atp-dependent, ABLIM1 - actin binding lim protein 1, LRRC16A - leucine rich repeat containing 16a, ABAT - 4-aminobutyrate aminotransferase, ABCA1 -…
GO:0042221	response to chemical	5.65e-06	0.000513	1.12	5590	940	2970	561	[MSTN - myostatin, LIG4 - ligase iv, dna, atp-dependent, GDI1 - gdp dissociation inhibitor 1, ABAT - 4-aminobutyrate aminotransferase, ABCA1 - atp-binding cassette, sub-family a (abc1), member 1, GATSL3 - gats protein-like 3, ABL2 - c-abl oncogene 2, non-receptor tyrosine kinase, ABR - active bcr-related, SPI1 - spleen focus forming virus (sffv) proviral integration oncogene, SPARC - secreted pro…
GO:0034654	nucleobase-containing compound biosynthetic process	5.63e-06	0.000515	1.13	5590	813	2970	490	[ZNF341 - zinc finger protein 341, PCGF5 - polycomb group ring finger 5, GFPT1 - glutamine--fructose-6-phosphate transaminase 1, SYMPK - symplekin, TADA1 - transcriptional adaptor 1, LIG4 - ligase iv, dna, atp-dependent, NCOA5 - nuclear receptor coactivator 5, NCOR2 - nuclear receptor corepressor 2, RNF14 - ring finger protein 14, SPI1 - spleen focus forming virus (sffv) proviral integration onco…
GO:0071417	cellular response to organonitrogen compound	6.4e-06	0.000572	1.32	5590	158	2970	111	[APEX1 - apex nuclease (multifunctional dna repair enzyme) 1, GATSL3 - gats protein-like 3, PSEN1 - presenilin 1, FOXO3 - forkhead box o3, GCK - glucokinase (hexokinase 4), KLF5 - kruppel-like factor 5 (intestinal), MMP2 - matrix metallopeptidase 2 (gelatinase a, 72kda gelatinase, 72kda type iv collagenase), CPS1 - carbamoyl-phosphate synthase 1, mitochondrial, GJB2 - gap junction protein, beta 2…
GO:0045935	positive regulation of nucleobase-containing compound metabolic process	6.39e-06	0.000575	1.16	5590	601	2970	370	[CCNK - cyclin k, PCGF5 - polycomb group ring finger 5, RFC4 - replication factor c (activator 1) 4, 37kda, YAF2 - yy1 associated factor 2, NCBP1 - nuclear cap binding protein subunit 1, 80kda, MAPRE3 - microtubule-associated protein, rp/eb family, member 3, HSF2 - heat shock transcription factor 2, RFC3 - replication factor c (activator 1) 3, 38kda, PRRX1 - paired related homeobox 1, DHX33 - dea…
GO:0042787	protein ubiquitination involved in ubiquitin-dependent protein catabolic process	7.36e-06	0.000638	1.56	5590	52	2970	43	[CDC16 - cell division cycle 16, UBR4 - ubiquitin protein ligase e3 component n-recognin 4, CUL5 - cullin 5, RNF19B - ring finger protein 19b, RMND5A - required for meiotic nuclear division 5 homolog a (s. cerevisiae), KLHL2 - kelch-like family member 2, KLHL3 - kelch-like family member 3, BTBD3 - btb (poz) domain containing 3, ANAPC7 - anaphase promoting complex subunit 7, MAEA - macrophage eryt…
GO:0000398	mRNA splicing, via spliceosome	7.36e-06	0.000643	1.56	5590	52	2970	43	[HNRNPUL1 - heterogeneous nuclear ribonucleoprotein u-like 1, CSTF1 - cleavage stimulation factor, 3' pre-rna, subunit 1, 50kda, SNRPD1 - small nuclear ribonucleoprotein d1 polypeptide 16kda, SF3B14 - splicing factor 3b, 14 kda subunit, NCBP1 - nuclear cap binding protein subunit 1, 80kda, DDX39A - dead (asp-glu-ala-asp) box polypeptide 39a, PUF60 - poly-u binding splicing factor 60kda, DDX41 - d…
GO:1901362	organic cyclic compound biosynthetic process	7.26e-06	0.000644	1.13	5590	884	2970	529	[ZNF341 - zinc finger protein 341, PCGF5 - polycomb group ring finger 5, GFPT1 - glutamine--fructose-6-phosphate transaminase 1, SYMPK - symplekin, TADA1 - transcriptional adaptor 1, LIG4 - ligase iv, dna, atp-dependent, NCOA5 - nuclear receptor coactivator 5, STARD3 - star-related lipid transfer (start) domain containing 3, NCOR2 - nuclear receptor corepressor 2, RNF14 - ring finger protein 14, …
GO:0000377	RNA splicing, via transesterification reactions with bulged adenosine as nucleophile	7.36e-06	0.000648	1.56	5590	52	2970	43	[HNRNPUL1 - heterogeneous nuclear ribonucleoprotein u-like 1, CSTF1 - cleavage stimulation factor, 3' pre-rna, subunit 1, 50kda, SF3B14 - splicing factor 3b, 14 kda subunit, SNRPD1 - small nuclear ribonucleoprotein d1 polypeptide 16kda, NCBP1 - nuclear cap binding protein subunit 1, 80kda, DDX39A - dead (asp-glu-ala-asp) box polypeptide 39a, PUF60 - poly-u binding splicing factor 60kda, DDX41 - d…
GO:0060284	regulation of cell development	7.56e-06	0.000651	1.21	5590	341	2970	220	[ITM2C - integral membrane protein 2c, PRRX1 - paired related homeobox 1, LIG4 - ligase iv, dna, atp-dependent, TRAK1 - trafficking protein, kinesin binding 1, LRRC16A - leucine rich repeat containing 16a, LIMK1 - lim domain kinase 1, GDI1 - gdp dissociation inhibitor 1, SPOCK1 - sparc/osteonectin, cwcv and kazal-like domains proteoglycan (testican) 1, RFX3 - regulatory factor x, 3 (influences hl…
GO:0045666	positive regulation of neuron differentiation	7.89e-06	0.000674	1.34	5590	139	2970	99	[RELN - reelin, TRAK1 - trafficking protein, kinesin binding 1, LIMK1 - lim domain kinase 1, GDI1 - gdp dissociation inhibitor 1, NRP1 - neuropilin 1, PLXNB1 - plexin b1, CPNE9 - copine family member ix, IQGAP1 - iq motif containing gtpase activating protein 1, ABL2 - c-abl oncogene 2, non-receptor tyrosine kinase, KATNB1 - katanin p80 (wd repeat containing) subunit b 1, PSEN1 - presenilin 1, C21…
GO:0051049	regulation of transport	8.56e-06	0.000726	1.15	5590	657	2970	401	[BMP2K - bmp2 inducible kinase, GDI1 - gdp dissociation inhibitor 1, ABAT - 4-aminobutyrate aminotransferase, ABCA1 - atp-binding cassette, sub-family a (abc1), member 1, GEM - gtp binding protein overexpressed in skeletal muscle, ABL2 - c-abl oncogene 2, non-receptor tyrosine kinase, ABR - active bcr-related, CARTPT - cart prepropeptide, REEP2 - receptor accessory protein 2, GCK - glucokinase (h…
GO:1905114	cell surface receptor signaling pathway involved in cell-cell signaling	8.7e-06	0.000732	1.38	5590	112	2970	82	[PSMD6 - proteasome (prosome, macropain) 26s subunit, non-atpase, 6, PRKAA2 - protein kinase, amp-activated, alpha 2 catalytic subunit, AP2A1 - adaptor-related protein complex 2, alpha 1 subunit, PRKAA1 - protein kinase, amp-activated, alpha 1 catalytic subunit, NKD1 - naked cuticle homolog 1 (drosophila), TLE1 - transducin-like enhancer of split 1 (e(sp1) homolog, drosophila), TLE3 - transducin-…
GO:0010243	response to organonitrogen compound	8.84e-06	0.00074	1.23	5590	287	2970	188	[APEX1 - apex nuclease (multifunctional dna repair enzyme) 1, OPRK1 - opioid receptor, kappa 1, ERLIN1 - er lipid raft associated 1, GATSL3 - gats protein-like 3, ABCA1 - atp-binding cassette, sub-family a (abc1), member 1, GSS - glutathione synthetase, SCAP - srebf chaperone, OTC - ornithine carbamoyltransferase, IQGAP1 - iq motif containing gtpase activating protein 1, POMT1 - protein-o-mannosy…
GO:0044281	small molecule metabolic process	9.13e-06	0.000758	1.15	5590	675	2970	411	[GFPT1 - glutamine--fructose-6-phosphate transaminase 1, SCD5 - stearoyl-coa desaturase 5, STARD3 - star-related lipid transfer (start) domain containing 3, LRRC16A - leucine rich repeat containing 16a, ABAT - 4-aminobutyrate aminotransferase, ABCA1 - atp-binding cassette, sub-family a (abc1), member 1, CARD11 - caspase recruitment domain family, member 11, SERINC3 - serine incorporator 3, PMM1 -…
GO:0016071	mRNA metabolic process	9.58e-06	0.00079	1.33	5590	141	2970	100	[NCBP1 - nuclear cap binding protein subunit 1, 80kda, SYMPK - symplekin, MBNL2 - muscleblind-like splicing regulator 2, DHX40 - deah (asp-glu-ala-his) box polypeptide 40, SF3A1 - splicing factor 3a, subunit 1, 120kda, UPF1 - upf1 regulator of nonsense transcripts homolog (yeast), PRPF19 - pre-mrna processing factor 19, NAA38 - n(alpha)-acetyltransferase 38, natc auxiliary subunit, TXNL4A - thior…
GO:0007389	pattern specification process	9.89e-06	0.000809	1.34	5590	133	2970	95	[RELN - reelin, TTC21B - tetratricopeptide repeat domain 21b, PAX2 - paired box 2, PAX6 - paired box 6, TCF15 - transcription factor 15 (basic helix-loop-helix), MID1 - midline 1 (opitz/bbb syndrome), PBX2 - pre-b-cell leukemia homeobox 2, PBX3 - pre-b-cell leukemia homeobox 3, PBX1 - pre-b-cell leukemia homeobox 1, WNT7B - wingless-type mmtv integration site family, member 7b, BCOR - bcl6 corepr…
GO:0070887	cellular response to chemical stimulus	1.02e-05	0.000831	1.16	5590	589	2970	362	[LIG4 - ligase iv, dna, atp-dependent, MSTN - myostatin, RFX2 - regulatory factor x, 2 (influences hla class ii expression), GATSL3 - gats protein-like 3, ABCA1 - atp-binding cassette, sub-family a (abc1), member 1, NRP1 - neuropilin 1, IQGAP1 - iq motif containing gtpase activating protein 1, EPAS1 - endothelial pas domain protein 1, ABL2 - c-abl oncogene 2, non-receptor tyrosine kinase, PAK4 - …
GO:1901698	response to nitrogen compound	1.11e-05	0.000899	1.22	5590	303	2970	197	[ABCA1 - atp-binding cassette, sub-family a (abc1), member 1, GATSL3 - gats protein-like 3, SCAP - srebf chaperone, IQGAP1 - iq motif containing gtpase activating protein 1, SPARC - secreted protein, acidic, cysteine-rich (osteonectin), DERL1 - derlin 1, GCK - glucokinase (hexokinase 4), KLF5 - kruppel-like factor 5 (intestinal), ABCG1 - atp-binding cassette, sub-family g (white), member 1, CPS1 …
GO:0071495	cellular response to endogenous stimulus	1.21e-05	0.000968	1.24	5590	271	2970	178	[APEX1 - apex nuclease (multifunctional dna repair enzyme) 1, PAX2 - paired box 2, MSTN - myostatin, GATSL3 - gats protein-like 3, IQGAP1 - iq motif containing gtpase activating protein 1, PSEN1 - presenilin 1, RDX - radixin, SIK2 - salt-inducible kinase 2, APAF1 - apoptotic peptidase activating factor 1, FOXO3 - forkhead box o3, GCK - glucokinase (hexokinase 4), KAT2A - k(lysine) acetyltransfera…
GO:1905330	regulation of morphogenesis of an epithelium	1.28e-05	0.00102	1.49	5590	63	2970	50	[PSMD6 - proteasome (prosome, macropain) 26s subunit, non-atpase, 6, AP2A1 - adaptor-related protein complex 2, alpha 1 subunit, PAX2 - paired box 2, NKD1 - naked cuticle homolog 1 (drosophila), MTOR - mechanistic target of rapamycin (serine/threonine kinase), NTN4 - netrin 4, ANKRD6 - ankyrin repeat domain 6, WNT11 - wingless-type mmtv integration site family, member 11, MLLT3 - myeloid/lymphoid…
GO:0016070	RNA metabolic process	1.32e-05	0.00104	1.12	5590	889	2970	530	[ZNF341 - zinc finger protein 341, PCGF5 - polycomb group ring finger 5, SYMPK - symplekin, TADA1 - transcriptional adaptor 1, NCOA5 - nuclear receptor coactivator 5, NCOR2 - nuclear receptor corepressor 2, RNF14 - ring finger protein 14, SPI1 - spleen focus forming virus (sffv) proviral integration oncogene, KAT2A - k(lysine) acetyltransferase 2a, L3MBTL3 - l(3)mbt-like 3 (drosophila), ZNF512 - …
GO:0009891	positive regulation of biosynthetic process	1.35e-05	0.00106	1.15	5590	622	2970	380	[CCNK - cyclin k, PCGF5 - polycomb group ring finger 5, RFC4 - replication factor c (activator 1) 4, 37kda, YAF2 - yy1 associated factor 2, MAPRE3 - microtubule-associated protein, rp/eb family, member 3, HSF2 - heat shock transcription factor 2, RFC3 - replication factor c (activator 1) 3, 38kda, PRRX1 - paired related homeobox 1, DHX33 - deah (asp-glu-ala-his) box polypeptide 33, MSTN - myostat…
GO:0051716	cellular response to stimulus	1.44e-05	0.00113	1.12	5590	938	2970	557	[GFPT1 - glutamine--fructose-6-phosphate transaminase 1, MSTN - myostatin, MAP3K8 - mitogen-activated protein kinase kinase kinase 8, LIG4 - ligase iv, dna, atp-dependent, PDIA4 - protein disulfide isomerase family a, member 4, ABCA1 - atp-binding cassette, sub-family a (abc1), member 1, GATSL3 - gats protein-like 3, ABL2 - c-abl oncogene 2, non-receptor tyrosine kinase, CARTPT - cart prepropepti…
GO:1901699	cellular response to nitrogen compound	1.47e-05	0.00114	1.3	5590	168	2970	116	[APEX1 - apex nuclease (multifunctional dna repair enzyme) 1, GATSL3 - gats protein-like 3, PSEN1 - presenilin 1, GCK - glucokinase (hexokinase 4), FOXO3 - forkhead box o3, KLF5 - kruppel-like factor 5 (intestinal), MMP2 - matrix metallopeptidase 2 (gelatinase a, 72kda gelatinase, 72kda type iv collagenase), CPS1 - carbamoyl-phosphate synthase 1, mitochondrial, GUCY1B3 - guanylate cyclase 1, solu…
GO:0120035	regulation of plasma membrane bounded cell projection organization	1.47e-05	0.00114	1.24	5590	253	2970	167	[LRIG2 - leucine-rich repeats and immunoglobulin-like domains 2, RELN - reelin, PDLIM5 - pdz and lim domain 5, ITM2C - integral membrane protein 2c, PRRX1 - paired related homeobox 1, TRAK1 - trafficking protein, kinesin binding 1, LIMK1 - lim domain kinase 1, GDI1 - gdp dissociation inhibitor 1, LRRC16A - leucine rich repeat containing 16a, SPOCK1 - sparc/osteonectin, cwcv and kazal-like domains…
GO:0006725	cellular aromatic compound metabolic process	1.53e-05	0.00117	1.1	5590	1284	2970	748	[PCGF5 - polycomb group ring finger 5, ZNF341 - zinc finger protein 341, GFPT1 - glutamine--fructose-6-phosphate transaminase 1, SYMPK - symplekin, TADA1 - transcriptional adaptor 1, LIG4 - ligase iv, dna, atp-dependent, NCOA5 - nuclear receptor coactivator 5, LRRC16A - leucine rich repeat containing 16a, CARD11 - caspase recruitment domain family, member 11, NCOR2 - nuclear receptor corepressor …
GO:0048666	neuron development	1.53e-05	0.00117	1.58	5590	44	2970	37	[FGFR2 - fibroblast growth factor receptor 2, ARL3 - adp-ribosylation factor-like 3, NEUROD1 - neuronal differentiation 1, FGFR1 - fibroblast growth factor receptor 1, PAX6 - paired box 6, PLXNA3 - plexin a3, PBX3 - pre-b-cell leukemia homeobox 3, MTMR2 - myotubularin related protein 2, HAND2 - heart and neural crest derivatives expressed 2, GABRB1 - gamma-aminobutyric acid (gaba) a receptor, bet…
GO:0045595	regulation of cell differentiation	1.59e-05	0.0012	1.15	5590	644	2970	392	[PRRX1 - paired related homeobox 1, LIG4 - ligase iv, dna, atp-dependent, MSTN - myostatin, LIMK1 - lim domain kinase 1, GDI1 - gdp dissociation inhibitor 1, LRRC16A - leucine rich repeat containing 16a, SPOCK1 - sparc/osteonectin, cwcv and kazal-like domains proteoglycan (testican) 1, ABCA1 - atp-binding cassette, sub-family a (abc1), member 1, DOCK5 - dedicator of cytokinesis 5, CARD11 - caspas…
GO:0009150	purine ribonucleotide metabolic process	1.7e-05	0.00127	1.37	5590	110	2970	80	[CROT - carnitine o-octanoyltransferase, PGM1 - phosphoglucomutase 1, PDE7B - phosphodiesterase 7b, ATP1A2 - atpase, na+/k+ transporting, alpha 2 polypeptide, ADSS - adenylosuccinate synthase, RHOQ - ras homolog family member q, PGAM2 - phosphoglycerate mutase 2 (muscle), ATP1B1 - atpase, na+/k+ transporting, beta 1 polypeptide, CARD11 - caspase recruitment domain family, member 11, ATIC - 5-amin…
GO:0010976	positive regulation of neuron projection development	1.72e-05	0.00128	1.36	5590	118	2970	85	[TMEM30A - transmembrane protein 30a, CBFA2T2 - core-binding factor, runt domain, alpha subunit 2; translocated to, 2, RRN3 - rrn3 rna polymerase i transcription factor homolog (s. cerevisiae), RELN - reelin, RUFY3 - run and fyve domain containing 3, TRAK1 - trafficking protein, kinesin binding 1, LIMK1 - lim domain kinase 1, GDI1 - gdp dissociation inhibitor 1, MTOR - mechanistic target of rapam…
GO:0035113	embryonic appendage morphogenesis	1.74e-05	0.00128	1.69	5590	30	2970	27	[PITX2 - paired-like homeodomain 2, OSR1 - odd-skipped related 1 (drosophila), RECK - reversion-inducing-cysteine-rich protein with kazal motifs, PRRX1 - paired related homeobox 1, FGFR1 - fibroblast growth factor receptor 1, FGF9 - fibroblast growth factor 9, FBXW4 - f-box and wd repeat domain containing 4, DLX6 - distal-less homeobox 6, PBX2 - pre-b-cell leukemia homeobox 2, PBX1 - pre-b-cell l…
GO:0030326	embryonic limb morphogenesis	1.74e-05	0.00129	1.69	5590	30	2970	27	[PITX2 - paired-like homeodomain 2, OSR1 - odd-skipped related 1 (drosophila), RECK - reversion-inducing-cysteine-rich protein with kazal motifs, PRRX1 - paired related homeobox 1, FGFR1 - fibroblast growth factor receptor 1, FGF9 - fibroblast growth factor 9, FBXW4 - f-box and wd repeat domain containing 4, DLX6 - distal-less homeobox 6, PBX2 - pre-b-cell leukemia homeobox 2, PBX1 - pre-b-cell l…
GO:0007399	nervous system development	1.79e-05	0.0013	1.39	5590	99	2970	73	[PURA - purine-rich element binding protein a, TRIM3 - tripartite motif containing 3, MTR - 5-methyltetrahydrofolate-homocysteine methyltransferase, ZNF423 - zinc finger protein 423, ARHGAP26 - rho gtpase activating protein 26, LIMK1 - lim domain kinase 1, CAMK2G - calcium/calmodulin-dependent protein kinase ii gamma, OLFM1 - olfactomedin 1, SPOCK1 - sparc/osteonectin, cwcv and kazal-like domains…
GO:0032774	RNA biosynthetic process	1.79e-05	0.00131	1.14	5590	696	2970	421	[ZNF341 - zinc finger protein 341, PCGF5 - polycomb group ring finger 5, SYMPK - symplekin, TADA1 - transcriptional adaptor 1, NCOA5 - nuclear receptor coactivator 5, NCOR2 - nuclear receptor corepressor 2, RNF14 - ring finger protein 14, SPI1 - spleen focus forming virus (sffv) proviral integration oncogene, KAT2A - k(lysine) acetyltransferase 2a, L3MBTL3 - l(3)mbt-like 3 (drosophila), ZNF512 - …
GO:0051603	proteolysis involved in cellular protein catabolic process	1.82e-05	0.00132	1.31	5590	157	2970	109	[PSMD6 - proteasome (prosome, macropain) 26s subunit, non-atpase, 6, RMND5A - required for meiotic nuclear division 5 homolog a (s. cerevisiae), CHMP4C - charged multivesicular body protein 4c, KCTD10 - potassium channel tetramerization domain containing 10, MAEA - macrophage erythroblast attacher, ERLIN1 - er lipid raft associated 1, KCTD5 - potassium channel tetramerization domain containing 5,…
GO:0048193	Golgi vesicle transport	1.88e-05	0.00135	1.37	5590	107	2970	78	[TBC1D20 - tbc1 domain family, member 20, AP2A1 - adaptor-related protein complex 2, alpha 1 subunit, KDELR1 - kdel (lys-asp-glu-leu) endoplasmic reticulum protein retention receptor 1, KIFAP3 - kinesin-associated protein 3, KIF2A - kinesin heavy chain member 2a, RAB6B - rab6b, member ras oncogene family, ARFGAP1 - adp-ribosylation factor gtpase activating protein 1, DCTN1 - dynactin 1, COG5 - co…
GO:0031328	positive regulation of cellular biosynthetic process	2.24e-05	0.0016	1.15	5590	612	2970	373	[CCNK - cyclin k, PCGF5 - polycomb group ring finger 5, RFC4 - replication factor c (activator 1) 4, 37kda, YAF2 - yy1 associated factor 2, MAPRE3 - microtubule-associated protein, rp/eb family, member 3, HSF2 - heat shock transcription factor 2, RFC3 - replication factor c (activator 1) 3, 38kda, PRRX1 - paired related homeobox 1, DHX33 - deah (asp-glu-ala-his) box polypeptide 33, MSTN - myostat…
GO:0031344	regulation of cell projection organization	2.3e-05	0.00163	1.24	5590	256	2970	168	[LRIG2 - leucine-rich repeats and immunoglobulin-like domains 2, RELN - reelin, PDLIM5 - pdz and lim domain 5, ITM2C - integral membrane protein 2c, PRRX1 - paired related homeobox 1, TRAK1 - trafficking protein, kinesin binding 1, LIMK1 - lim domain kinase 1, LRRC16A - leucine rich repeat containing 16a, GDI1 - gdp dissociation inhibitor 1, SPOCK1 - sparc/osteonectin, cwcv and kazal-like domains…
GO:0016055	Wnt signaling pathway	2.36e-05	0.00166	1.36	5590	109	2970	79	[PSMD6 - proteasome (prosome, macropain) 26s subunit, non-atpase, 6, PRKAA2 - protein kinase, amp-activated, alpha 2 catalytic subunit, AP2A1 - adaptor-related protein complex 2, alpha 1 subunit, PRKAA1 - protein kinase, amp-activated, alpha 1 catalytic subunit, NKD1 - naked cuticle homolog 1 (drosophila), TLE1 - transducin-like enhancer of split 1 (e(sp1) homolog, drosophila), TLE3 - transducin-…
GO:0006397	mRNA processing	2.52e-05	0.00177	1.38	5590	98	2970	72	[HNRNPUL1 - heterogeneous nuclear ribonucleoprotein u-like 1, CSTF1 - cleavage stimulation factor, 3' pre-rna, subunit 1, 50kda, NCBP1 - nuclear cap binding protein subunit 1, 80kda, DBR1 - debranching rna lariats 1, SYMPK - symplekin, PTBP3 - polypyrimidine tract binding protein 3, MBNL2 - muscleblind-like splicing regulator 2, DHX40 - deah (asp-glu-ala-his) box polypeptide 40, SF3A1 - splicing …
GO:2000027	regulation of organ morphogenesis	2.54e-05	0.00177	1.41	5590	87	2970	65	[PSMD6 - proteasome (prosome, macropain) 26s subunit, non-atpase, 6, AP2A1 - adaptor-related protein complex 2, alpha 1 subunit, PAX2 - paired box 2, NKD1 - naked cuticle homolog 1 (drosophila), HES1 - hairy and enhancer of split 1, (drosophila), ANKRD6 - ankyrin repeat domain 6, NTN4 - netrin 4, HAND2 - heart and neural crest derivatives expressed 2, BCOR - bcl6 corepressor, WNT11 - wingless-typ…
GO:0043549	regulation of kinase activity	2.67e-05	0.00185	1.2	5590	335	2970	214	[CCNK - cyclin k, MAPRE3 - microtubule-associated protein, rp/eb family, member 3, MSTN - myostatin, MAP3K8 - mitogen-activated protein kinase kinase kinase 8, IQGAP1 - iq motif containing gtpase activating protein 1, CARTPT - cart prepropeptide, PAK4 - p21 protein (cdc42/rac)-activated kinase 4, HRAS - harvey rat sarcoma viral oncogene homolog, TRAF4 - tnf receptor-associated factor 4, PLK1 - po…
GO:0010608	posttranscriptional regulation of gene expression	2.74e-05	0.00188	1.3	5590	153	2970	106	[APEX1 - apex nuclease (multifunctional dna repair enzyme) 1, PSMD6 - proteasome (prosome, macropain) 26s subunit, non-atpase, 6, ZC3H7B - zinc finger ccch-type containing 7b, DHX36 - deah (asp-glu-ala-his) box polypeptide 36, NCBP1 - nuclear cap binding protein subunit 1, 80kda, DDX1 - dead (asp-glu-ala-asp) box helicase 1, DDX25 - dead (asp-glu-ala-asp) box helicase 25, PRR16 - proline rich 16,…
GO:0009161	ribonucleoside monophosphate metabolic process	2.85e-05	0.00195	1.47	5590	64	2970	50	[UCK1 - uridine-cytidine kinase 1, PGM1 - phosphoglucomutase 1, ATP1A2 - atpase, na+/k+ transporting, alpha 2 polypeptide, ADSS - adenylosuccinate synthase, PGAM2 - phosphoglycerate mutase 2 (muscle), ATP1B1 - atpase, na+/k+ transporting, beta 1 polypeptide, CARD11 - caspase recruitment domain family, member 11, ATIC - 5-aminoimidazole-4-carboxamide ribonucleotide formyltransferase/imp cyclohydro…
GO:0016050	vesicle organization	2.9e-05	0.00196	1.37	5590	103	2970	75	[TBC1D20 - tbc1 domain family, member 20, VTA1 - vesicle (multivesicular body) trafficking 1, SNF8 - snf8, escrt-ii complex subunit, SYP - synaptophysin, CHMP4C - charged multivesicular body protein 4c, VAV3 - vav 3 guanine nucleotide exchange factor, RFX2 - regulatory factor x, 2 (influences hla class ii expression), ABCA1 - atp-binding cassette, sub-family a (abc1), member 1, VPS37A - vacuolar …
GO:0051347	positive regulation of transferase activity	2.89e-05	0.00197	1.23	5590	255	2970	167	[CCNK - cyclin k, PSMD6 - proteasome (prosome, macropain) 26s subunit, non-atpase, 6, RFC4 - replication factor c (activator 1) 4, 37kda, RELN - reelin, MAPRE3 - microtubule-associated protein, rp/eb family, member 3, RFC3 - replication factor c (activator 1) 3, 38kda, TCP1 - t-complex 1, MAP3K8 - mitogen-activated protein kinase kinase kinase 8, MST4 - serine/threonine protein kinase mst4, GADD4…
GO:1901360	organic cyclic compound metabolic process	2.95e-05	0.00198	1.09	5590	1365	2970	790	[GFPT1 - glutamine--fructose-6-phosphate transaminase 1, SYMPK - symplekin, TADA1 - transcriptional adaptor 1, STARD3 - star-related lipid transfer (start) domain containing 3, LRRC16A - leucine rich repeat containing 16a, ABCA1 - atp-binding cassette, sub-family a (abc1), member 1, PMM1 - phosphomannomutase 1, GCH1 - gtp cyclohydrolase 1, GCK - glucokinase (hexokinase 4), KAT2A - k(lysine) acety…
GO:0010033	response to organic substance	2.99e-05	0.002	1.13	5590	761	2970	456	[MSTN - myostatin, ABAT - 4-aminobutyrate aminotransferase, ABCA1 - atp-binding cassette, sub-family a (abc1), member 1, GATSL3 - gats protein-like 3, ABL2 - c-abl oncogene 2, non-receptor tyrosine kinase, ABR - active bcr-related, SPI1 - spleen focus forming virus (sffv) proviral integration oncogene, SPARC - secreted protein, acidic, cysteine-rich (osteonectin), PMM1 - phosphomannomutase 1, GCH…
GO:0006139	nucleobase-containing compound metabolic process	3.18e-05	0.00211	1.1	5590	1216	2970	708	[PCGF5 - polycomb group ring finger 5, ZNF341 - zinc finger protein 341, GFPT1 - glutamine--fructose-6-phosphate transaminase 1, SYMPK - symplekin, TADA1 - transcriptional adaptor 1, LIG4 - ligase iv, dna, atp-dependent, NCOA5 - nuclear receptor coactivator 5, CARD11 - caspase recruitment domain family, member 11, NCOR2 - nuclear receptor corepressor 2, RNF14 - ring finger protein 14, SPI1 - sple…
GO:0006470	protein dephosphorylation	3.2e-05	0.00211	1.42	5590	78	2970	59	[TAB1 - tgf-beta activated kinase 1/map3k7 binding protein 1, PTPRR - protein tyrosine phosphatase, receptor type, r, PPP2R2D - protein phosphatase 2, regulatory subunit b, delta, CAMK2G - calcium/calmodulin-dependent protein kinase ii gamma, PTPRM - protein tyrosine phosphatase, receptor type, m, PTPRT - protein tyrosine phosphatase, receptor type, t, DUSP19 - dual specificity phosphatase 19, MT…
GO:0018105	peptidyl-serine phosphorylation	3.2e-05	0.00212	1.42	5590	78	2970	59	[PRKAA2 - protein kinase, amp-activated, alpha 2 catalytic subunit, PRKAA1 - protein kinase, amp-activated, alpha 1 catalytic subunit, AKT3 - v-akt murine thymoma viral oncogene homolog 3, NEK6 - nima-related kinase 6, DAPK2 - death-associated protein kinase 2, MTOR - mechanistic target of rapamycin (serine/threonine kinase), CAMK2G - calcium/calmodulin-dependent protein kinase ii gamma, CAMK2B -…
GO:0007169	transmembrane receptor protein tyrosine kinase signaling pathway	3.42e-05	0.00224	1.25	5590	215	2970	143	[NCBP1 - nuclear cap binding protein subunit 1, 80kda, GFRA1 - gdnf family receptor alpha 1, FLT4 - fms-related tyrosine kinase 4, NRP1 - neuropilin 1, NRP2 - neuropilin 2, ELMO1 - engulfment and cell motility 1, IQGAP1 - iq motif containing gtpase activating protein 1, ABL2 - c-abl oncogene 2, non-receptor tyrosine kinase, PSEN2 - presenilin 2 (alzheimer disease 4), PLCB1 - phospholipase c, beta…
GO:0009056	catabolic process	3.51e-05	0.00227	1.14	5590	600	2970	365	[NCBP1 - nuclear cap binding protein subunit 1, 80kda, CHMP4C - charged multivesicular body protein 4c, MCCC1 - methylcrotonoyl-coa carboxylase 1 (alpha), HSD17B4 - hydroxysteroid (17-beta) dehydrogenase 4, MAEA - macrophage erythroblast attacher, BCKDK - branched chain ketoacid dehydrogenase kinase, ABAT - 4-aminobutyrate aminotransferase, VPS37A - vacuolar protein sorting 37 homolog a (s. cerev…
GO:0030029	actin filament-based process	3.5e-05	0.00228	1.31	5590	147	2970	102	[SDAD1 - sda1 domain containing 1, SPIRE1 - spire actin nucleation factor 1, LIMK1 - lim domain kinase 1, DIAPH3 - diaphanous-related formin 3, NRP1 - neuropilin 1, FLII - flightless i homolog (drosophila), ELMO1 - engulfment and cell motility 1, MKLN1 - muskelin 1, intracellular mediator containing kelch motifs, MYOZ2 - myozenin 2, ABR - active bcr-related, PAK4 - p21 protein (cdc42/rac)-activat…
GO:0071375	cellular response to peptide hormone stimulus	3.65e-05	0.00235	1.44	5590	72	2970	55	[APEX1 - apex nuclease (multifunctional dna repair enzyme) 1, PRKACB - protein kinase, camp-dependent, catalytic, beta, SLC9A1 - solute carrier family 9, subfamily a (nhe1, cation proton antiporter 1), member 1, GOT1 - glutamic-oxaloacetic transaminase 1, soluble, RHOQ - ras homolog family member q, VAMP2 - vesicle-associated membrane protein 2 (synaptobrevin 2), GCK - glucokinase (hexokinase 4),…
GO:0033043	regulation of organelle organization	3.92e-05	0.00251	1.17	5590	430	2970	268	[CHMP4C - charged multivesicular body protein 4c, LIG4 - ligase iv, dna, atp-dependent, SPIRE1 - spire actin nucleation factor 1, LRRC16A - leucine rich repeat containing 16a, LIMK1 - lim domain kinase 1, STARD7 - star-related lipid transfer (start) domain containing 7, HES1 - hairy and enhancer of split 1, (drosophila), PLXNB1 - plexin b1, PLXNA3 - plexin a3, NRP1 - neuropilin 1, BCOR - bcl6 cor…
GO:0065009	regulation of molecular function	4.32e-05	0.00275	1.1	5590	1109	2970	648	[BMP2K - bmp2 inducible kinase, GFRA1 - gdnf family receptor alpha 1, AGAP3 - arfgap with gtpase domain, ankyrin repeat and ph domain 3, MSTN - myostatin, MAP3K8 - mitogen-activated protein kinase kinase kinase 8, GDI1 - gdp dissociation inhibitor 1, LIMK1 - lim domain kinase 1, SPOCK1 - sparc/osteonectin, cwcv and kazal-like domains proteoglycan (testican) 1, GEM - gtp binding protein overexpres…
GO:0009126	purine nucleoside monophosphate metabolic process	4.39e-05	0.00276	1.47	5590	60	2970	47	[PRKAG2 - protein kinase, amp-activated, gamma 2 non-catalytic subunit, MYH4 - myosin, heavy chain 4, skeletal muscle, PGM2L1 - phosphoglucomutase 2-like 1, DLG2 - discs, large homolog 2 (drosophila), PGM1 - phosphoglucomutase 1, ATP1A2 - atpase, na+/k+ transporting, alpha 2 polypeptide, GAPDHS - glyceraldehyde-3-phosphate dehydrogenase, spermatogenic, PGAM2 - phosphoglycerate mutase 2 (muscle), …
GO:0001505	regulation of neurotransmitter levels	4.41e-05	0.00276	1.53	5590	48	2970	39	[NOS1 - nitric oxide synthase 1 (neuronal), ATP2A2 - atpase, ca++ transporting, cardiac muscle, slow twitch 2, DNAJC5 - dnaj (hsp40) homolog, subfamily c, member 5, NAALAD2 - n-acetylated alpha-linked acidic dipeptidase 2, SLC6A4 - solute carrier family 6 (neurotransmitter transporter), member 4, ATP1A2 - atpase, na+/k+ transporting, alpha 2 polypeptide, ABAT - 4-aminobutyrate aminotransferase, L…
GO:0048523	negative regulation of cellular process	4.38e-05	0.00277	1.08	5590	1540	2970	884	[PRRX1 - paired related homeobox 1, MSTN - myostatin, LRRC16A - leucine rich repeat containing 16a, GDI1 - gdp dissociation inhibitor 1, ABAT - 4-aminobutyrate aminotransferase, CBX1 - chromobox homolog 1, ABCA1 - atp-binding cassette, sub-family a (abc1), member 1, GATSL3 - gats protein-like 3, PLXNB1 - plexin b1, PLXNA3 - plexin a3, ABR - active bcr-related, PMP22 - peripheral myelin protein 22…
GO:0007626	locomotory behavior	4.49e-05	0.0028	1.49	5590	57	2970	45	[OXR1 - oxidation resistance 1, OPRK1 - opioid receptor, kappa 1, HIPK2 - homeodomain interacting protein kinase 2, SOBP - sine oculis binding protein homolog (drosophila), PTEN - phosphatase and tensin homolog, FGF12 - fibroblast growth factor 12, C1QL1 - complement component 1, q subcomponent-like 1, ATP1A2 - atpase, na+/k+ transporting, alpha 2 polypeptide, ABAT - 4-aminobutyrate aminotransfer…
GO:0051648	vesicle localization	4.52e-05	0.0028	1.51	5590	51	2970	41	[NDE1 - nude neurodevelopment protein 1, KIFAP3 - kinesin-associated protein 3, DNAJC5 - dnaj (hsp40) homolog, subfamily c, member 5, AP3M2 - adaptor-related protein complex 3, mu 2 subunit, KIF5B - kinesin family member 5b, DCTN1 - dynactin 1, OTOF - otoferlin, KIF3A - kinesin family member 3a, LIN7A - lin-7 homolog a (c. elegans), SYT2 - synaptotagmin ii, VPS33B - vacuolar protein sorting 33 ho…
GO:0006366	transcription from RNA polymerase II promoter	4.56e-05	0.00281	1.26	5590	194	2970	130	[CCNK - cyclin k, NCBP1 - nuclear cap binding protein subunit 1, 80kda, HSF2 - heat shock transcription factor 2, PAX2 - paired box 2, MITF - microphthalmia-associated transcription factor, PAX6 - paired box 6, TCF15 - transcription factor 15 (basic helix-loop-helix), INTS5 - integrator complex subunit 5, TCF21 - transcription factor 21, ELK4 - elk4, ets-domain protein (srf accessory protein 1), …
GO:0048468	cell development	4.59e-05	0.00281	1.24	5590	231	2970	152	[AFG3L2 - afg3 atpase family member 3-like 2 (s. cerevisiae), HSD17B4 - hydroxysteroid (17-beta) dehydrogenase 4, DDX25 - dead (asp-glu-ala-asp) box helicase 25, MAEA - macrophage erythroblast attacher, MSTN - myostatin, PAX6 - paired box 6, RFX2 - regulatory factor x, 2 (influences hla class ii expression), HES1 - hairy and enhancer of split 1, (drosophila), PLXNA3 - plexin a3, PBX3 - pre-b-cell…
GO:0046483	heterocycle metabolic process	4.87e-05	0.00297	1.09	5590	1279	2970	741	[PCGF5 - polycomb group ring finger 5, ZNF341 - zinc finger protein 341, GFPT1 - glutamine--fructose-6-phosphate transaminase 1, SYMPK - symplekin, TADA1 - transcriptional adaptor 1, LIG4 - ligase iv, dna, atp-dependent, NCOA5 - nuclear receptor coactivator 5, LRRC16A - leucine rich repeat containing 16a, CARD11 - caspase recruitment domain family, member 11, NCOR2 - nuclear receptor corepressor …
GO:0061024	membrane organization	5.02e-05	0.00304	1.23	5590	255	2970	166	[AFG3L2 - afg3 atpase family member 3-like 2 (s. cerevisiae), TBC1D20 - tbc1 domain family, member 20, SPIRE1 - spire actin nucleation factor 1, GDI1 - gdp dissociation inhibitor 1, ABCA1 - atp-binding cassette, sub-family a (abc1), member 1, RIN2 - ras and rab interactor 2, RAB3IP - rab3a interacting protein, FA2H - fatty acid 2-hydroxylase, ELMO1 - engulfment and cell motility 1, DCTN1 - dynact…
GO:0007167	enzyme linked receptor protein signaling pathway	5.03e-05	0.00304	1.21	5590	284	2970	183	[NCBP1 - nuclear cap binding protein subunit 1, 80kda, GFRA1 - gdnf family receptor alpha 1, MSTN - myostatin, FLT4 - fms-related tyrosine kinase 4, NRP1 - neuropilin 1, NRP2 - neuropilin 2, ELMO1 - engulfment and cell motility 1, IQGAP1 - iq motif containing gtpase activating protein 1, ABL2 - c-abl oncogene 2, non-receptor tyrosine kinase, SOSTDC1 - sclerostin domain containing 1, PSEN2 - prese…
GO:0043434	response to peptide hormone	5.14e-05	0.00309	1.33	5590	125	2970	88	[APEX1 - apex nuclease (multifunctional dna repair enzyme) 1, OPRK1 - opioid receptor, kappa 1, PRKACB - protein kinase, camp-dependent, catalytic, beta, SLC9A1 - solute carrier family 9, subfamily a (nhe1, cation proton antiporter 1), member 1, MTOR - mechanistic target of rapamycin (serine/threonine kinase), GOT1 - glutamic-oxaloacetic transaminase 1, soluble, RHOQ - ras homolog family member q…
GO:0006352	DNA-templated transcription, initiation	5.32e-05	0.00318	1.43	5590	71	2970	54	[MED27 - mediator complex subunit 27, RRN3 - rrn3 rna polymerase i transcription factor homolog (s. cerevisiae), MED6 - mediator complex subunit 6, MED7 - mediator complex subunit 7, POLR1B - polymerase (rna) i polypeptide b, 128kda, MED23 - mediator complex subunit 23, WWTR1 - ww domain containing transcription regulator 1, CTGF - connective tissue growth factor, GTF2E2 - general transcription f…
GO:0006816	calcium ion transport	5.67e-05	0.00337	1.44	5590	68	2970	52	[AFG3L2 - afg3 atpase family member 3-like 2 (s. cerevisiae), ATP2A1 - atpase, ca++ transporting, cardiac muscle, fast twitch 1, ATP2A2 - atpase, ca++ transporting, cardiac muscle, slow twitch 2, ATP2A3 - atpase, ca++ transporting, ubiquitous, CAMK2G - calcium/calmodulin-dependent protein kinase ii gamma, CTGF - connective tissue growth factor, TRPC4 - transient receptor potential cation channel,…
GO:0030111	regulation of Wnt signaling pathway	6.05e-05	0.00358	1.34	5590	114	2970	81	[PSMD6 - proteasome (prosome, macropain) 26s subunit, non-atpase, 6, ATP6V1C2 - atpase, h+ transporting, lysosomal 42kda, v1 subunit c2, NKD1 - naked cuticle homolog 1 (drosophila), CDH2 - cadherin 2, type 1, n-cadherin (neuronal), TLE1 - transducin-like enhancer of split 1 (e(sp1) homolog, drosophila), WWTR1 - ww domain containing transcription regulator 1, ANKRD6 - ankyrin repeat domain 6, FRZB…
GO:0009167	purine ribonucleoside monophosphate metabolic process	6.56e-05	0.00386	1.47	5590	59	2970	46	[PRKAG2 - protein kinase, amp-activated, gamma 2 non-catalytic subunit, MYH4 - myosin, heavy chain 4, skeletal muscle, PGM2L1 - phosphoglucomutase 2-like 1, DLG2 - discs, large homolog 2 (drosophila), PGM1 - phosphoglucomutase 1, ATP1A2 - atpase, na+/k+ transporting, alpha 2 polypeptide, GAPDHS - glyceraldehyde-3-phosphate dehydrogenase, spermatogenic, PGAM2 - phosphoglycerate mutase 2 (muscle), …
GO:0032006	regulation of TOR signaling	6.6e-05	0.00386	1.54	5590	44	2970	36	[PRKAA2 - protein kinase, amp-activated, alpha 2 catalytic subunit, WDR59 - wd repeat domain 59, PRKAA1 - protein kinase, amp-activated, alpha 1 catalytic subunit, AKT3 - v-akt murine thymoma viral oncogene homolog 3, RELN - reelin, SESN3 - sestrin 3, DEPTOR - dep domain containing mtor-interacting protein, TBC1D7 - tbc1 domain family, member 7, LAMTOR3 - late endosomal/lysosomal adaptor, mapk an…
GO:0051246	regulation of protein metabolic process	6.71e-05	0.00391	1.11	5590	911	2970	537	[SYMPK - symplekin, MSTN - myostatin, MAP3K8 - mitogen-activated protein kinase kinase kinase 8, LIMK1 - lim domain kinase 1, PRR16 - proline rich 16, SPOCK1 - sparc/osteonectin, cwcv and kazal-like domains proteoglycan (testican) 1, CARD11 - caspase recruitment domain family, member 11, PPP4R4 - protein phosphatase 4, regulatory subunit 4, NCOR2 - nuclear receptor corepressor 2, RNF14 - ring fin…
GO:0034220	ion transmembrane transport	6.76e-05	0.00392	1.2	5590	297	2970	190	[AFG3L2 - afg3 atpase family member 3-like 2 (s. cerevisiae), NIPA2 - non imprinted in prader-willi/angelman syndrome 2, KCNAB2 - potassium voltage-gated channel, shaker-related subfamily, beta member 2, ABCA1 - atp-binding cassette, sub-family a (abc1), member 1, TRPC4 - transient receptor potential cation channel, subfamily c, member 4, NIPA1 - non imprinted in prader-willi/angelman syndrome 1,…
GO:0023057	negative regulation of signaling	7.33e-05	0.00417	1.16	5590	487	2970	299	[NCOA5 - nuclear receptor coactivator 5, MSTN - myostatin, GATSL3 - gats protein-like 3, NRP1 - neuropilin 1, CARTPT - cart prepropeptide, KCTD6 - potassium channel tetramerization domain containing 6, APCDD1 - adenomatosis polyposis coli down-regulated 1, SHISA2 - shisa family member 2, SPRED2 - sprouty-related, evh1 domain containing 2, SYVN1 - synovial apoptosis inhibitor 1, synoviolin, RFFL -…
GO:0045859	regulation of protein kinase activity	7.24e-05	0.00418	1.2	5590	311	2970	198	[CCNK - cyclin k, MAPRE3 - microtubule-associated protein, rp/eb family, member 3, MAP3K8 - mitogen-activated protein kinase kinase kinase 8, IQGAP1 - iq motif containing gtpase activating protein 1, CARTPT - cart prepropeptide, PAK4 - p21 protein (cdc42/rac)-activated kinase 4, HRAS - harvey rat sarcoma viral oncogene homolog, TRAF4 - tnf receptor-associated factor 4, PLK1 - polo-like kinase 1, …
GO:0010648	negative regulation of cell communication	7.33e-05	0.00419	1.16	5590	487	2970	299	[NCOA5 - nuclear receptor coactivator 5, MSTN - myostatin, GATSL3 - gats protein-like 3, NRP1 - neuropilin 1, CARTPT - cart prepropeptide, KCTD6 - potassium channel tetramerization domain containing 6, APCDD1 - adenomatosis polyposis coli down-regulated 1, SHISA2 - shisa family member 2, SPRED2 - sprouty-related, evh1 domain containing 2, SYVN1 - synovial apoptosis inhibitor 1, synoviolin, RFFL -…
GO:0071363	cellular response to growth factor stimulus	7.32e-05	0.0042	1.33	5590	116	2970	82	[PAX2 - paired box 2, NOS1 - nitric oxide synthase 1 (neuronal), FLT4 - fms-related tyrosine kinase 4, KIF1B - kinesin family member 1b, KDR - kinase insert domain receptor (a type iii receptor tyrosine kinase), NRP1 - neuropilin 1, IQGAP1 - iq motif containing gtpase activating protein 1, RDX - radixin, SPARC - secreted protein, acidic, cysteine-rich (osteonectin), APAF1 - apoptotic peptidase ac…
GO:0006520	cellular amino acid metabolic process	7.62e-05	0.00431	1.31	5590	134	2970	93	[MTR - 5-methyltetrahydrofolate-homocysteine methyltransferase, GFPT1 - glutamine--fructose-6-phosphate transaminase 1, MCCC1 - methylcrotonoyl-coa carboxylase 1 (alpha), GADL1 - glutamate decarboxylase-like 1, AGMAT - agmatine ureohydrolase (agmatinase), NOS1 - nitric oxide synthase 1 (neuronal), NAALAD2 - n-acetylated alpha-linked acidic dipeptidase 2, DARS2 - aspartyl-trna synthetase 2, mitoch…
GO:0031399	regulation of protein modification process	7.91e-05	0.00445	1.14	5590	620	2970	374	[CCNK - cyclin k, MAPRE3 - microtubule-associated protein, rp/eb family, member 3, SYMPK - symplekin, MSTN - myostatin, MAP3K8 - mitogen-activated protein kinase kinase kinase 8, LIMK1 - lim domain kinase 1, HES1 - hairy and enhancer of split 1, (drosophila), NRP1 - neuropilin 1, PPP4R4 - protein phosphatase 4, regulatory subunit 4, BCOR - bcl6 corepressor, IQGAP1 - iq motif containing gtpase act…
GO:0071695	anatomical structure maturation	7.98e-05	0.00447	1.61	5590	34	2970	29	[PAX2 - paired box 2, RECK - reversion-inducing-cysteine-rich protein with kazal motifs, FGFR3 - fibroblast growth factor receptor 3, MAEA - macrophage erythroblast attacher, PTBP3 - polypyrimidine tract binding protein 3, C1QL1 - complement component 1, q subcomponent-like 1, RFX3 - regulatory factor x, 3 (influences hla class ii expression), NTN4 - netrin 4, NR4A2 - nuclear receptor subfamily 4…
GO:0051726	regulation of cell cycle	8.22e-05	0.00458	1.18	5590	379	2970	237	[CCNK - cyclin k, CHMP4C - charged multivesicular body protein 4c, MAPRE3 - microtubule-associated protein, rp/eb family, member 3, CAB39L - calcium binding protein 39-like, MAP3K8 - mitogen-activated protein kinase kinase kinase 8, MAEA - macrophage erythroblast attacher, CDKL4 - cyclin-dependent kinase-like 4, HES1 - hairy and enhancer of split 1, (drosophila), EP300 - e1a binding protein p300,…
GO:0006886	intracellular protein transport	8.89e-05	0.00493	1.23	5590	233	2970	152	[SNF8 - snf8, escrt-ii complex subunit, SDAD1 - sda1 domain containing 1, KDELR1 - kdel (lys-asp-glu-leu) endoplasmic reticulum protein retention receptor 1, KIFAP3 - kinesin-associated protein 3, AP3M2 - adaptor-related protein complex 3, mu 2 subunit, TRAK1 - trafficking protein, kinesin binding 1, TBC1D15 - tbc1 domain family, member 15, HES1 - hairy and enhancer of split 1, (drosophila), RAB3…
GO:0071229	cellular response to acid chemical	9.35e-05	0.00516	1.38	5590	86	2970	63	[PRKAA2 - protein kinase, amp-activated, alpha 2 catalytic subunit, PRKAA1 - protein kinase, amp-activated, alpha 1 catalytic subunit, PAX2 - paired box 2, CAPN2 - calpain 2, (m/ii) large subunit, SLC6A4 - solute carrier family 6 (neurotransmitter transporter), member 4, MTOR - mechanistic target of rapamycin (serine/threonine kinase), LAMTOR3 - late endosomal/lysosomal adaptor, mapk and mtor act…
GO:0051962	positive regulation of nervous system development	9.57e-05	0.00526	1.25	5590	191	2970	127	[RELN - reelin, PAX2 - paired box 2, LIG4 - ligase iv, dna, atp-dependent, PAX6 - paired box 6, TRAK1 - trafficking protein, kinesin binding 1, LIMK1 - lim domain kinase 1, GDI1 - gdp dissociation inhibitor 1, HES1 - hairy and enhancer of split 1, (drosophila), PLXNB1 - plexin b1, NRP1 - neuropilin 1, CPNE9 - copine family member ix, IQGAP1 - iq motif containing gtpase activating protein 1, ABL2 …
GO:0006417	regulation of translation	9.9e-05	0.00542	1.33	5590	115	2970	81	[PURA - purine-rich element binding protein a, NCBP1 - nuclear cap binding protein subunit 1, 80kda, SECISBP2L - secis binding protein 2-like, DDX1 - dead (asp-glu-ala-asp) box helicase 1, DDX25 - dead (asp-glu-ala-asp) box helicase 25, NUP133 - nucleoporin 133kda, PRR16 - proline rich 16, MTOR - mechanistic target of rapamycin (serine/threonine kinase), EIF1B - eukaryotic translation initiation …

## Sheet: low conservation, high variance
GO Term	Description	P-value	FDR q-value	Enrichment	N	B	n	b	Genes
GO:0006955	immune response	1.9e-11	2.22e-07	1.46	5590	230	2620	157	[NCF2 - neutrophil cytosolic factor 2, EMP2 - epithelial membrane protein 2, ERAP1 - endoplasmic reticulum aminopeptidase 1, MASP1 - mannan-binding lectin serine peptidase 1 (c4/c2 activating component of ra-reactive factor), CD244 - cd244 molecule, natural killer cell receptor 2b4, CD83 - cd83 molecule, NLRX1 - nlr family member x1, CXCL12 - chemokine (c-x-c motif) ligand 12, CD274 - cd274 molec…
GO:0006952	defense response	5.2e-11	3.05e-07	1.4	5590	278	2620	183	[NCF2 - neutrophil cytosolic factor 2, BNIP3 - bcl2/adenovirus e1b 19kda interacting protein 3, MASP1 - mannan-binding lectin serine peptidase 1 (c4/c2 activating component of ra-reactive factor), PLAC8 - placenta-specific 8, CD244 - cd244 molecule, natural killer cell receptor 2b4, F11R - f11 receptor, CD83 - cd83 molecule, HNRNPA0 - heterogeneous nuclear ribonucleoprotein a0, NLRX1 - nlr family…
GO:0045087	innate immune response	3.01e-09	1.17e-05	1.58	5590	112	2620	83	[NCF2 - neutrophil cytosolic factor 2, MR1 - major histocompatibility complex, class i-related, MASP1 - mannan-binding lectin serine peptidase 1 (c4/c2 activating component of ra-reactive factor), CFI - complement factor i, CD244 - cd244 molecule, natural killer cell receptor 2b4, F12 - coagulation factor xii (hageman factor), NLRX1 - nlr family member x1, TICAM1 - toll-like receptor adaptor mole…
GO:0006959	humoral immune response	7.78e-09	2.28e-05	1.86	5590	47	2620	41	[C9 - complement component 9, IGJ - immunoglobulin j polypeptide, linker protein for immunoglobulin alpha and mu polypeptides, MASP1 - mannan-binding lectin serine peptidase 1 (c4/c2 activating component of ra-reactive factor), CFI - complement factor i, CD83 - cd83 molecule, ST6GAL1 - st6 beta-galactosamide alpha-2,6-sialyltranferase 1, TFE3 - transcription factor binding to ighm enhancer 3, BST…
GO:0072376	protein activation cascade	7.43e-08	0.000174	1.99	5590	30	2620	28	[F11 - coagulation factor xi, F9 - coagulation factor ix, C9 - complement component 9, FGG - fibrinogen gamma chain, F8 - coagulation factor viii, procoagulant component, MASP1 - mannan-binding lectin serine peptidase 1 (c4/c2 activating component of ra-reactive factor), CFI - complement factor i, F12 - coagulation factor xii (hageman factor), FGB - fibrinogen beta chain, TFPI - tissue factor pat…
GO:0098542	defense response to other organism	1.26e-07	0.000245	1.57	5590	94	2620	69	[MR1 - major histocompatibility complex, class i-related, BNIP3 - bcl2/adenovirus e1b 19kda interacting protein 3, PLAC8 - placenta-specific 8, OASL - 2'-5'-oligoadenylate synthetase-like, TICAM1 - toll-like receptor adaptor molecule 1, SAMHD1 - sam domain and hd domain 1, SERINC5 - serine incorporator 5, RELA - v-rel avian reticuloendotheliosis viral oncogene homolog a, TMEM173 - transmembrane p…
GO:0002673	regulation of acute inflammatory response	8.22e-07	0.00137	1.92	5590	30	2620	27	[C9 - complement component 9, CFI - complement factor i, F12 - coagulation factor xii (hageman factor), TAC1 - tachykinin, precursor 1, ADAM8 - adam metallopeptidase domain 8, CREB3L3 - camp responsive element binding protein 3-like 3, SERPING1 - serpin peptidase inhibitor, clade g (c1 inhibitor), member 1, C1QA - complement component 1, q subcomponent, a chain, C1QB - complement component 1, q s…
GO:0030449	regulation of complement activation	2.47e-06	0.00362	2.13	5590	17	2620	17	[C9 - complement component 9, CFI - complement factor i, SERPING1 - serpin peptidase inhibitor, clade g (c1 inhibitor), member 1, C1QA - complement component 1, q subcomponent, a chain, C1QB - complement component 1, q subcomponent, b chain, C1QC - complement component 1, q subcomponent, c chain, C4BPA - complement component 4 binding protein, alpha, C4BPB - complement component 4 binding protein…
GO:0032757	positive regulation of interleukin-8 production	2.47e-06	0.00322	2.13	5590	17	2620	17	[IL17D - interleukin 17d, CD244 - cd244 molecule, natural killer cell receptor 2b4, ZNF580 - zinc finger protein 580, LBP - lipopolysaccharide binding protein, AFAP1L2 - actin filament associated protein 1-like 2, HYAL2 - hyaluronoglucosaminidase 2, FADD - fas (tnfrsf6)-associated via death domain, IL1B - interleukin 1, beta, TIRAP - toll-interleukin 1 receptor (tir) domain containing adaptor pro…
GO:0006954	inflammatory response	3.19e-06	0.00374	1.43	5590	127	2620	85	[F8 - coagulation factor viii, procoagulant component, F12 - coagulation factor xii (hageman factor), F11R - f11 receptor, TAC1 - tachykinin, precursor 1, ZNF580 - zinc finger protein 580, HNRNPA0 - heterogeneous nuclear ribonucleoprotein a0, CHST2 - carbohydrate (n-acetylglucosamine-6-o) sulfotransferase 2, TICAM1 - toll-like receptor adaptor molecule 1, SPP1 - secreted phosphoprotein 1, RELA - …
GO:0051707	response to other organism	5.76e-06	0.00613	1.41	5590	130	2620	86	[MR1 - major histocompatibility complex, class i-related, ERAP1 - endoplasmic reticulum aminopeptidase 1, BNIP3 - bcl2/adenovirus e1b 19kda interacting protein 3, PLAC8 - placenta-specific 8, OASL - 2'-5'-oligoadenylate synthetase-like, LGALS8 - lectin, galactoside-binding, soluble, 8, CXCL12 - chemokine (c-x-c motif) ligand 12, TICAM1 - toll-like receptor adaptor molecule 1, SAMHD1 - sam domain …
GO:0006958	complement activation, classical pathway	1.13e-05	0.0111	2.13	5590	15	2620	15	[C9 - complement component 9, CFI - complement factor i, MASP2 - mannan-binding lectin serine peptidase 2, SERPING1 - serpin peptidase inhibitor, clade g (c1 inhibitor), member 1, C1QA - complement component 1, q subcomponent, a chain, C1QB - complement component 1, q subcomponent, b chain, C1QC - complement component 1, q subcomponent, c chain, C4BPA - complement component 4 binding protein, alp…
GO:0006956	complement activation	1.22e-05	0.011	2.02	5590	19	2620	18	[C9 - complement component 9, MASP1 - mannan-binding lectin serine peptidase 1 (c4/c2 activating component of ra-reactive factor), CFI - complement factor i, MASP2 - mannan-binding lectin serine peptidase 2, SERPING1 - serpin peptidase inhibitor, clade g (c1 inhibitor), member 1, C1QA - complement component 1, q subcomponent, a chain, C1QB - complement component 1, q subcomponent, b chain, C1QC -…
GO:0002920	regulation of humoral immune response	1.22e-05	0.0102	2.02	5590	19	2620	18	[C9 - complement component 9, CFI - complement factor i, FOXJ1 - forkhead box j1, SERPING1 - serpin peptidase inhibitor, clade g (c1 inhibitor), member 1, C1QA - complement component 1, q subcomponent, a chain, C1QB - complement component 1, q subcomponent, b chain, C1QC - complement component 1, q subcomponent, c chain, C4BPA - complement component 4 binding protein, alpha, C4BPB - complement co…
GO:0043207	response to external biotic stimulus	1.77e-05	0.0138	1.3	5590	217	2620	132	[BNIP3 - bcl2/adenovirus e1b 19kda interacting protein 3, ERAP1 - endoplasmic reticulum aminopeptidase 1, PLAC8 - placenta-specific 8, LGALS8 - lectin, galactoside-binding, soluble, 8, HNRNPA0 - heterogeneous nuclear ribonucleoprotein a0, CXCL12 - chemokine (c-x-c motif) ligand 12, FMO1 - flavin containing monooxygenase 1, TICAM1 - toll-like receptor adaptor molecule 1, SAMHD1 - sam domain and hd…
GO:0050727	regulation of inflammatory response	1.91e-05	0.014	1.42	5590	113	2620	75	[CFI - complement factor i, SBNO2 - strawberry notch homolog 2 (drosophila), F12 - coagulation factor xii (hageman factor), TAC1 - tachykinin, precursor 1, APOA1 - apolipoprotein a-i, FANCA - fanconi anemia, complementation group a, NLRX1 - nlr family member x1, PLA2G7 - phospholipase a2, group vii (platelet-activating factor acetylhydrolase, plasma), TICAM1 - toll-like receptor adaptor molecule …
GO:0031347	regulation of defense response	2.24e-05	0.0155	1.3	5590	214	2620	130	[ERAP1 - endoplasmic reticulum aminopeptidase 1, LGMN - legumain, APOA1 - apolipoprotein a-i, NLRX1 - nlr family member x1, HEXIM1 - hexamethylene bis-acetamide inducible 1, TICAM1 - toll-like receptor adaptor molecule 1, SAMHD1 - sam domain and hd domain 1, RELA - v-rel avian reticuloendotheliosis viral oncogene homolog a, LDLR - low density lipoprotein receptor, TMEM173 - transmembrane protein …
GO:2000257	regulation of protein activation cascade	2.49e-05	0.0162	2.02	5590	18	2620	17	[C9 - complement component 9, CFI - complement factor i, SERPING1 - serpin peptidase inhibitor, clade g (c1 inhibitor), member 1, C1QA - complement component 1, q subcomponent, a chain, C1QB - complement component 1, q subcomponent, b chain, C1QC - complement component 1, q subcomponent, c chain, C4BPA - complement component 4 binding protein, alpha, C4BPB - complement component 4 binding protein…
GO:0050830	defense response to Gram-positive bacterium	5.18e-05	0.0319	2.13	5590	13	2620	13	[EPHA2 - eph receptor a2, LBP - lipopolysaccharide binding protein, ACP5 - acid phosphatase 5, tartrate resistant, CARD9 - caspase recruitment domain family, member 9, NOD1 - nucleotide-binding oligomerization domain containing 1, TIRAP - toll-interleukin 1 receptor (tir) domain containing adaptor protein, DMBT1 - deleted in malignant brain tumors 1, GSDMD - gasdermin d, RARRES2 - retinoic acid r…
GO:0009607	response to biotic stimulus	5.21e-05	0.0305	1.27	5590	228	2620	136	[BNIP3 - bcl2/adenovirus e1b 19kda interacting protein 3, ERAP1 - endoplasmic reticulum aminopeptidase 1, PLAC8 - placenta-specific 8, LGALS8 - lectin, galactoside-binding, soluble, 8, HNRNPA0 - heterogeneous nuclear ribonucleoprotein a0, CXCL12 - chemokine (c-x-c motif) ligand 12, FMO1 - flavin containing monooxygenase 1, TICAM1 - toll-like receptor adaptor molecule 1, SAMHD1 - sam domain and hd…
GO:0042742	defense response to bacterium	7.2e-05	0.0402	1.65	5590	40	2620	31	[MR1 - major histocompatibility complex, class i-related, IGJ - immunoglobulin j polypeptide, linker protein for immunoglobulin alpha and mu polypeptides, CLEC4E - c-type lectin domain family 4, member e, PLAC8 - placenta-specific 8, NOD1 - nucleotide-binding oligomerization domain containing 1, TIRAP - toll-interleukin 1 receptor (tir) domain containing adaptor protein, RARRES2 - retinoic acid r…

## Sheet: low conservation, low variance
No enrichments found
