# Supplementary material for: A quantitative framework for characterizing the evolutionary history of mammalian gene expression
Source: HighWire-hosted journal article supplement (doi:10.1101/gr.237636.118), 2018-12-14
Supplement: Supplemental_Table_S4.xlsx [file Supplemental_Table_S4.xlsx]

## Sheet: README
Table S4. Alignment statistics for RNA-seq libraries derived from muscle samples from patients with neuromuscular disease
Columns	Explanation
Patient #	Arbitrary patient ID number
Published in Cummings et al. Sci. Transl. Med. 2017	Was this data published previously in Cummings et al. Sci. Transl. Med. 2017? Y = Yes; N = No
Muscular Dystrophy Status	BMD = Becker muscular dystrophy; DMD = Duchenne muscular dystrophy
Read Length	Read length
# Mapped Pairs	Number of mapped pairs
Intragenic Rate	Rate of reads falling in genic regions

## Sheet: Sheet1
Patient #	Published in Cummings et al. Sci. Transl. Med. 2017	Muscular Dystrophy Status	Read Length	# Mapped Pairs	Intragenic Rate
1	Y	BMD	101	308293799	0.9003
2	Y	BMD	76	24872769	0.8898
3	N	DMD	76	80805427	0.9417
4	Y	DMD	76	31065410	0.8813
5	Y	DMD	76	33107379	0.8737
6	Y	DMD	76	31321491	0.8842
7	Y	DMD	101	30475145	0.8799
8	Y	DMD	76	55840278	0.8871
9	N		76	419808	0.8825
10	N		76	8030101	0.8503
11	N		76	54673501	0.8837
12	N		76	67342109	0.83
13	N		76	144036567	0.9035
14	N		125	183218371	0.8901
15	N		101	80538880	0.9379
16	N		76	37246723	0.9516
17	N		76	32312186	0.9671
18	N		125	30072062	0.964
19	N		76	26983053	0.9682
20	N		76	27190077	0.9757
21	N		76	27431840	0.9716
22	N		76	22147674	0.9735
23	N		76	26196234	0.96
24	N		76	25449140	0.9556
25	N		76	25577997	0.9589
26	N		76	24496382	0.9711
27	N		76	38471545	0.9623
28	N		101	31007000	0.964
29	N		76	43711196	0.9629
30	N		76	40912244	0.9701
31	N		76	42660173	0.9635
32	N		76	41742717	0.9707
33	N		76	26471444	0.9528
34	N		76	67038545	0.951
35	N		76	24341157	0.9511
36	N		101	24234120	0.965
37	N		101	26352869	0.9632
38	N		76	34592970	0.9694
39	Y		101	17150042	0.8896
40	Y		101	24256735	0.8883
41	Y		101	25815147	0.8751
42	Y		101	26143360	0.8909
43	Y		76	27797848	0.8727
44	Y		76	28159647	0.912
45	Y		101	28722254	0.8913
46	Y		76	30201143	0.8895
47	Y		101	31096185	0.895
48	Y		101	31506999	0.8887
49	Y		76	32443488	0.8695
50	Y		76	33289450	0.8847
51	Y		76	33399994	0.8706
52	Y		76	33866992	0.8723
53	Y		76	34810277	0.8872
54	Y		76	38610563	0.879
55	Y		101	39319500	0.8901
56	Y		76	41659987	0.8934
57	Y		101	44621845	0.8851
58	Y		101	48015066	0.859
59	Y		76	48624007	0.8999
60	Y		76	48716866	0.8867
61	Y		76	49589271	0.8744
62	Y		76	50845804	0.8954
63	Y		101	51648117	0.8718
64	Y		101	51851284	0.8625
65	Y		76	51912939	0.8672
66	Y		76	53540437	0.8381
67	Y		76	56072501	0.9116
68	Y		101	56160566	0.8798
69	Y		76	56822287	0.8582
70	Y		76	56951938	0.8572
71	Y		76	57276356	0.8751
72	Y		76	57915688	0.8503
73	Y		76	58902944	0.883
74	Y		76	59085235	0.888
75	Y		76	59181080	0.8755
76	Y		76	59354121	0.8878
77	Y		76	59637279	0.8801
78	Y		76	61252147	0.8634
79	Y		101	61496243	0.8659
80	Y		101	62254066	0.8689
81	Y		76	65235605	0.8792
82	Y		76	66438882	0.8693
83	Y		101	66939035	0.8926
84	Y		101	70459825	0.873
85	Y		76	75098265	0.9026
86	Y		76	75694975	0.8685
87	Y		76	78175368	0.9002
88	Y		76	90086779	0.8981
89	Y		76	96747156	0.8359
90	Y		101	116903487	0.8908
91	Y		76	120165921	0.8698
92	Y		101	147801177	0.8893
93	Y		76	165058410	0.8432
