# Supplementary material for: A quantitative framework for characterizing the evolutionary history of mammalian gene expression
Source: HighWire-hosted journal article supplement (doi:10.1101/gr.237636.118), 2018-12-14
Supplement: Supplemental_Table_S5.xlsx [file Supplemental_Table_S5.xlsx]

## Sheet: README
Table S5. GO enrichment results of genes with lineage-specific gene expression. Background set is all genes expressed > 1 TPM in the corresponding tissue.
Columns	Explanation
GO Term	Enriched GO term
Description	Description of GO term
P-value	P-value
FDR q-value	FDR q-value
Enrichment	Enrichment ratio
N	Total number of background genes
B	Number of background genes belonging to corresponding GO term
n	Total number of test genes
b	Number of test genes belonging to corresponding GO term
Genes	Names of test genes belonging to corresponding GO term

## Sheet: Primate downregulated, liver
GO Term	Description	P-value	FDR q-value	Enrichment	N	B	n	b	Genes
GO:0006082	organic acid metabolic process	9.56e-17	1.21e-12	2.72	7556	498	429	77	[PRKAB1 - protein kinase, amp-activated, beta 1 non-catalytic subunit, ANGPTL3 - angiopoietin-like 3, AGMAT - agmatine ureohydrolase (agmatinase), HSD17B4 - hydroxysteroid (17-beta) dehydrogenase 4, PYCRL - pyrroline-5-carboxylate reductase-like, SUCLG1 - succinate-coa ligase, alpha subunit, SLC7A2 - solute carrier family 7 (cationic amino acid transporter, y+ system), member 2, FMO1 - flavin con…
GO:0019752	carboxylic acid metabolic process	4.05e-16	2.55e-12	2.83	7556	436	429	70	[PRKAB1 - protein kinase, amp-activated, beta 1 non-catalytic subunit, ANGPTL3 - angiopoietin-like 3, AGMAT - agmatine ureohydrolase (agmatinase), HSD17B4 - hydroxysteroid (17-beta) dehydrogenase 4, SUCLG1 - succinate-coa ligase, alpha subunit, PYCRL - pyrroline-5-carboxylate reductase-like, SLC7A2 - solute carrier family 7 (cationic amino acid transporter, y+ system), member 2, AMACR - alpha-met…
GO:0043436	oxoacid metabolic process	1.98e-15	8.3e-12	2.65	7556	492	429	74	[PRKAB1 - protein kinase, amp-activated, beta 1 non-catalytic subunit, ANGPTL3 - angiopoietin-like 3, AGMAT - agmatine ureohydrolase (agmatinase), HSD17B4 - hydroxysteroid (17-beta) dehydrogenase 4, PYCRL - pyrroline-5-carboxylate reductase-like, SUCLG1 - succinate-coa ligase, alpha subunit, SLC7A2 - solute carrier family 7 (cationic amino acid transporter, y+ system), member 2, AMACR - alpha-met…
GO:0016054	organic acid catabolic process	6.5e-15	2.05e-11	4.5	7556	141	429	36	[ACOX2 - acyl-coa oxidase 2, branched chain, ACOX3 - acyl-coa oxidase 3, pristanoyl, HSD17B4 - hydroxysteroid (17-beta) dehydrogenase 4, LPIN1 - lipin 1, AMACR - alpha-methylacyl-coa racemase, UROC1 - urocanate hydratase 1, CDO1 - cysteine dioxygenase type 1, AASS - aminoadipate-semialdehyde synthase, OTC - ornithine carbamoyltransferase, NUDT19 - nudix (nucleoside diphosphate linked moiety x)-ty…
GO:0046395	carboxylic acid catabolic process	6.5e-15	1.64e-11	4.5	7556	141	429	36	[ACOX2 - acyl-coa oxidase 2, branched chain, ACOX3 - acyl-coa oxidase 3, pristanoyl, HSD17B4 - hydroxysteroid (17-beta) dehydrogenase 4, LPIN1 - lipin 1, AMACR - alpha-methylacyl-coa racemase, UROC1 - urocanate hydratase 1, CDO1 - cysteine dioxygenase type 1, AASS - aminoadipate-semialdehyde synthase, OTC - ornithine carbamoyltransferase, NUDT19 - nudix (nucleoside diphosphate linked moiety x)-ty…
GO:0006629	lipid metabolic process	8.93e-15	1.88e-11	2.39	7556	619	429	84	[TEX2 - testis expressed 2, PRKAB1 - protein kinase, amp-activated, beta 1 non-catalytic subunit, ANGPTL3 - angiopoietin-like 3, HSD17B4 - hydroxysteroid (17-beta) dehydrogenase 4, AMACR - alpha-methylacyl-coa racemase, ABCB11 - atp-binding cassette, sub-family b (mdr/tap), member 11, LDLR - low density lipoprotein receptor, NUDT19 - nudix (nucleoside diphosphate linked moiety x)-type motif 19, R…
GO:0044255	cellular lipid metabolic process	3.34e-14	6.02e-11	2.56	7556	496	429	72	[TEX2 - testis expressed 2, PRKAB1 - protein kinase, amp-activated, beta 1 non-catalytic subunit, ANGPTL3 - angiopoietin-like 3, HSD17B4 - hydroxysteroid (17-beta) dehydrogenase 4, AMACR - alpha-methylacyl-coa racemase, NUDT19 - nudix (nucleoside diphosphate linked moiety x)-type motif 19, RAB14 - rab14, member ras oncogene family, GPLD1 - glycosylphosphatidylinositol specific phospholipase d1, A…
GO:0009062	fatty acid catabolic process	4.81e-13	7.58e-10	7.19	7556	49	429	20	[ACAD11 - acyl-coa dehydrogenase family, member 11, CPT2 - carnitine palmitoyltransferase 2, PEX7 - peroxisomal biogenesis factor 7, ACOX2 - acyl-coa oxidase 2, branched chain, ACOX3 - acyl-coa oxidase 3, pristanoyl, HSD17B4 - hydroxysteroid (17-beta) dehydrogenase 4, LPIN1 - lipin 1, EHHADH - enoyl-coa, hydratase/3-hydroxyacyl coa dehydrogenase, AMACR - alpha-methylacyl-coa racemase, HACL1 - 2-h…
GO:0044242	cellular lipid catabolic process	1.44e-12	2.02e-09	4.95	7556	96	429	27	[ACOX2 - acyl-coa oxidase 2, branched chain, SGPL1 - sphingosine-1-phosphate lyase 1, ACOX3 - acyl-coa oxidase 3, pristanoyl, ANGPTL3 - angiopoietin-like 3, HSD17B4 - hydroxysteroid (17-beta) dehydrogenase 4, LPIN1 - lipin 1, AMACR - alpha-methylacyl-coa racemase, NUDT19 - nudix (nucleoside diphosphate linked moiety x)-type motif 19, HADH - hydroxyacyl-coa dehydrogenase, ACADL - acyl-coa dehydrog…
GO:0019395	fatty acid oxidation	4.32e-12	5.44e-09	7.37	7556	43	429	18	[ADIPOR2 - adiponectin receptor 2, CPT2 - carnitine palmitoyltransferase 2, ACAD11 - acyl-coa dehydrogenase family, member 11, PEX7 - peroxisomal biogenesis factor 7, ACOX2 - acyl-coa oxidase 2, branched chain, ACOX3 - acyl-coa oxidase 3, pristanoyl, HSD17B4 - hydroxysteroid (17-beta) dehydrogenase 4, EHHADH - enoyl-coa, hydratase/3-hydroxyacyl coa dehydrogenase, AMACR - alpha-methylacyl-coa race…
GO:0044281	small molecule metabolic process	5.31e-12	6.09e-09	1.99	7556	857	429	97	[ANGPTL3 - angiopoietin-like 3, HSD17B4 - hydroxysteroid (17-beta) dehydrogenase 4, SUCLG1 - succinate-coa ligase, alpha subunit, AMACR - alpha-methylacyl-coa racemase, FMO1 - flavin containing monooxygenase 1, PNPO - pyridoxamine 5'-phosphate oxidase, GSS - glutathione synthetase, AASS - aminoadipate-semialdehyde synthase, GDA - guanine deaminase, LDLR - low density lipoprotein receptor, OTC - o…
GO:0034440	lipid oxidation	6.93e-12	7.28e-09	7.21	7556	44	429	18	[ADIPOR2 - adiponectin receptor 2, ACAD11 - acyl-coa dehydrogenase family, member 11, CPT2 - carnitine palmitoyltransferase 2, PEX7 - peroxisomal biogenesis factor 7, ACOX2 - acyl-coa oxidase 2, branched chain, ACOX3 - acyl-coa oxidase 3, pristanoyl, HSD17B4 - hydroxysteroid (17-beta) dehydrogenase 4, EHHADH - enoyl-coa, hydratase/3-hydroxyacyl coa dehydrogenase, AMACR - alpha-methylacyl-coa race…
GO:0006631	fatty acid metabolic process	1.57e-11	1.52e-08	3.89	7556	145	429	32	[ADIPOR2 - adiponectin receptor 2, ACOX2 - acyl-coa oxidase 2, branched chain, SGPL1 - sphingosine-1-phosphate lyase 1, ACOX3 - acyl-coa oxidase 3, pristanoyl, PRKAB1 - protein kinase, amp-activated, beta 1 non-catalytic subunit, ANGPTL3 - angiopoietin-like 3, HSD17B4 - hydroxysteroid (17-beta) dehydrogenase 4, LPIN1 - lipin 1, AMACR - alpha-methylacyl-coa racemase, ZADH2 - zinc binding alcohol d…
GO:0032787	monocarboxylic acid metabolic process	1.98e-11	1.78e-08	3.18	7556	227	429	41	[ADIPOR2 - adiponectin receptor 2, ACOX2 - acyl-coa oxidase 2, branched chain, ACOX3 - acyl-coa oxidase 3, pristanoyl, SGPL1 - sphingosine-1-phosphate lyase 1, PRKAB1 - protein kinase, amp-activated, beta 1 non-catalytic subunit, ANGPTL3 - angiopoietin-like 3, HSD17B4 - hydroxysteroid (17-beta) dehydrogenase 4, ALDH8A1 - aldehyde dehydrogenase 8 family, member a1, LPIN1 - lipin 1, AMACR - alpha-m…
GO:0044282	small molecule catabolic process	2.03e-11	1.71e-08	3.43	7556	190	429	37	[ACOX2 - acyl-coa oxidase 2, branched chain, ACOX3 - acyl-coa oxidase 3, pristanoyl, HSD17B4 - hydroxysteroid (17-beta) dehydrogenase 4, LPIN1 - lipin 1, AMACR - alpha-methylacyl-coa racemase, UROC1 - urocanate hydratase 1, CDO1 - cysteine dioxygenase type 1, AASS - aminoadipate-semialdehyde synthase, OTC - ornithine carbamoyltransferase, NUDT19 - nudix (nucleoside diphosphate linked moiety x)-ty…
GO:0072329	monocarboxylic acid catabolic process	2.8e-11	2.2e-08	5.97	7556	59	429	20	[ACAD11 - acyl-coa dehydrogenase family, member 11, CPT2 - carnitine palmitoyltransferase 2, PEX7 - peroxisomal biogenesis factor 7, ACOX2 - acyl-coa oxidase 2, branched chain, ACOX3 - acyl-coa oxidase 3, pristanoyl, HSD17B4 - hydroxysteroid (17-beta) dehydrogenase 4, LPIN1 - lipin 1, EHHADH - enoyl-coa, hydratase/3-hydroxyacyl coa dehydrogenase, AMACR - alpha-methylacyl-coa racemase, HACL1 - 2-h…
GO:0006635	fatty acid beta-oxidation	6.52e-11	4.83e-08	8.01	7556	33	429	15	[ACAD11 - acyl-coa dehydrogenase family, member 11, CPT2 - carnitine palmitoyltransferase 2, ACOX2 - acyl-coa oxidase 2, branched chain, PEX7 - peroxisomal biogenesis factor 7, ACOX3 - acyl-coa oxidase 3, pristanoyl, HSD17B4 - hydroxysteroid (17-beta) dehydrogenase 4, EHHADH - enoyl-coa, hydratase/3-hydroxyacyl coa dehydrogenase, AMACR - alpha-methylacyl-coa racemase, HADH - hydroxyacyl-coa dehyd…
GO:0044248	cellular catabolic process	2.56e-10	1.79e-07	1.96	7556	771	429	86	[NRBF2 - nuclear receptor binding factor 2, ERAP1 - endoplasmic reticulum aminopeptidase 1, TOMM40 - translocase of outer mitochondrial membrane 40 homolog (yeast), NCBP1 - nuclear cap binding protein subunit 1, 80kda, MARK2 - map/microtubule affinity-regulating kinase 2, DDX6 - dead (asp-glu-ala-asp) box helicase 6, EXOSC9 - exosome component 9, PRKAB1 - protein kinase, amp-activated, beta 1 non…
GO:0055114	oxidation-reduction process	2.97e-10	1.97e-07	2.38	7556	430	429	58	[HSD17B4 - hydroxysteroid (17-beta) dehydrogenase 4, PYCRL - pyrroline-5-carboxylate reductase-like, NDUFA6 - nadh dehydrogenase (ubiquinone) 1 alpha subcomplex, 6, 14kda, AMACR - alpha-methylacyl-coa racemase, FMO1 - flavin containing monooxygenase 1, PNPO - pyridoxamine 5'-phosphate oxidase, AASS - aminoadipate-semialdehyde synthase, COX10 - cytochrome c oxidase assembly homolog 10 (yeast), ALD…
GO:0016042	lipid catabolic process	3.49e-10	2.2e-07	3.76	7556	136	429	29	[ACOX2 - acyl-coa oxidase 2, branched chain, SGPL1 - sphingosine-1-phosphate lyase 1, ACOX3 - acyl-coa oxidase 3, pristanoyl, ANGPTL3 - angiopoietin-like 3, HSD17B4 - hydroxysteroid (17-beta) dehydrogenase 4, LPIN1 - lipin 1, AMACR - alpha-methylacyl-coa racemase, NUDT19 - nudix (nucleoside diphosphate linked moiety x)-type motif 19, HADH - hydroxyacyl-coa dehydrogenase, ACADL - acyl-coa dehydrog…
GO:0030258	lipid modification	2.67e-09	1.61e-06	3.66	7556	130	429	27	[ADIPOR2 - adiponectin receptor 2, ACOX2 - acyl-coa oxidase 2, branched chain, ACOX3 - acyl-coa oxidase 3, pristanoyl, HSD17B4 - hydroxysteroid (17-beta) dehydrogenase 4, KLB - klotho beta, AMACR - alpha-methylacyl-coa racemase, EGFR - epidermal growth factor receptor, HADH - hydroxyacyl-coa dehydrogenase, ACADL - acyl-coa dehydrogenase, long chain, HADHA - hydroxyacyl-coa dehydrogenase/3-ketoacy…
GO:0009056	catabolic process	6.98e-09	4e-06	1.78	7556	918	429	93	[NRBF2 - nuclear receptor binding factor 2, ERAP1 - endoplasmic reticulum aminopeptidase 1, TOMM40 - translocase of outer mitochondrial membrane 40 homolog (yeast), NCBP1 - nuclear cap binding protein subunit 1, 80kda, MARK2 - map/microtubule affinity-regulating kinase 2, DDX6 - dead (asp-glu-ala-asp) box helicase 6, EXOSC9 - exosome component 9, PRKAB1 - protein kinase, amp-activated, beta 1 non…
GO:0006520	cellular amino acid metabolic process	1.61e-07	8.8e-05	2.9	7556	176	429	29	[CTPS2 - ctp synthase 2, AGMAT - agmatine ureohydrolase (agmatinase), PYCRL - pyrroline-5-carboxylate reductase-like, SLC7A2 - solute carrier family 7 (cationic amino acid transporter, y+ system), member 2, UROC1 - urocanate hydratase 1, GSS - glutathione synthetase, CDO1 - cysteine dioxygenase type 1, AASS - aminoadipate-semialdehyde synthase, OTC - ornithine carbamoyltransferase, ALDH4A1 - alde…
GO:1901575	organic substance catabolic process	3.15e-07	0.000165	1.75	7556	783	429	78	[ERAP1 - endoplasmic reticulum aminopeptidase 1, NCBP1 - nuclear cap binding protein subunit 1, 80kda, DDX6 - dead (asp-glu-ala-asp) box helicase 6, EXOSC9 - exosome component 9, RMND5A - required for meiotic nuclear division 5 homolog a (s. cerevisiae), ANGPTL3 - angiopoietin-like 3, HSD17B4 - hydroxysteroid (17-beta) dehydrogenase 4, RNF43 - ring finger protein 43, PAPD5 - pap associated domain…
GO:1901605	alpha-amino acid metabolic process	1.45e-06	0.00073	3.12	7556	124	429	22	[HNF4A - hepatocyte nuclear factor 4, alpha, IYD - iodotyrosine deiodinase, ACAD8 - acyl-coa dehydrogenase family, member 8, CTPS2 - ctp synthase 2, CPS1 - carbamoyl-phosphate synthase 1, mitochondrial, AGMAT - agmatine ureohydrolase (agmatinase), GLS2 - glutaminase 2 (liver, mitochondrial), PYCRL - pyrroline-5-carboxylate reductase-like, UROC1 - urocanate hydratase 1, HPD - 4-hydroxyphenylpyruva…
GO:0009063	cellular amino acid catabolic process	1.91e-06	0.000926	3.91	7556	72	429	16	[ACAD8 - acyl-coa dehydrogenase family, member 8, GLS2 - glutaminase 2 (liver, mitochondrial), PCYOX1 - prenylcysteine oxidase 1, UROC1 - urocanate hydratase 1, HPD - 4-hydroxyphenylpyruvate dioxygenase, CDO1 - cysteine dioxygenase type 1, AASS - aminoadipate-semialdehyde synthase, OTC - ornithine carbamoyltransferase, ALDH4A1 - aldehyde dehydrogenase 4 family, member a1, HYKK - hydroxylysine kin…
GO:0033539	fatty acid beta-oxidation using acyl-CoA dehydrogenase	2.35e-06	0.0011	11.74	7556	9	429	6	[ACAD11 - acyl-coa dehydrogenase family, member 11, ACOX2 - acyl-coa oxidase 2, branched chain, ACOX3 - acyl-coa oxidase 3, pristanoyl, ACADL - acyl-coa dehydrogenase, long chain, ACADM - acyl-coa dehydrogenase, c-4 to c-12 straight chain, ETFDH - electron-transferring-flavoprotein dehydrogenase]
GO:0009064	glutamine family amino acid metabolic process	5.18e-06	0.00233	5.1	7556	38	429	11	[OTC - ornithine carbamoyltransferase, ALDH4A1 - aldehyde dehydrogenase 4 family, member a1, CPS1 - carbamoyl-phosphate synthase 1, mitochondrial, CTPS2 - ctp synthase 2, AGMAT - agmatine ureohydrolase (agmatinase), HAL - histidine ammonia-lyase, GLS2 - glutaminase 2 (liver, mitochondrial), GCLC - glutamate-cysteine ligase, catalytic subunit, PPAT - phosphoribosyl pyrophosphate amidotransferase, …
GO:0007031	peroxisome organization	7.83e-06	0.0034	8.22	7556	15	429	7	[TMEM135 - transmembrane protein 135, PEX7 - peroxisomal biogenesis factor 7, PEX3 - peroxisomal biogenesis factor 3, LONP2 - lon peptidase 2, peroxisomal, ABCD3 - atp-binding cassette, sub-family d (ald), member 3, ABCD1 - atp-binding cassette, sub-family d (ald), member 1, PEX1 - peroxisomal biogenesis factor 1]
GO:0006869	lipid transport	8e-06	0.00336	2.91	7556	127	429	21	[CPT2 - carnitine palmitoyltransferase 2, TMEM30A - transmembrane protein 30a, ATP11B - atpase, class vi, type 11b, NPC1 - niemann-pick disease, type c1, TMEM30B - transmembrane protein 30b, ABCB11 - atp-binding cassette, sub-family b (mdr/tap), member 11, MSR1 - macrophage scavenger receptor 1, OSBPL1A - oxysterol binding protein-like 1a, LDLR - low density lipoprotein receptor, LIPC - lipase, h…
GO:1901606	alpha-amino acid catabolic process	1.02e-05	0.00416	3.85	7556	64	429	14	[ACAD8 - acyl-coa dehydrogenase family, member 8, GLS2 - glutaminase 2 (liver, mitochondrial), UROC1 - urocanate hydratase 1, HPD - 4-hydroxyphenylpyruvate dioxygenase, CDO1 - cysteine dioxygenase type 1, AASS - aminoadipate-semialdehyde synthase, OTC - ornithine carbamoyltransferase, ALDH4A1 - aldehyde dehydrogenase 4 family, member a1, HYKK - hydroxylysine kinase, PAH - phenylalanine hydroxylas…
GO:0033540	fatty acid beta-oxidation using acyl-CoA oxidase	1.17e-05	0.00461	9.61	7556	11	429	6	[ACOX2 - acyl-coa oxidase 2, branched chain, ACOX3 - acyl-coa oxidase 3, pristanoyl, HSD17B4 - hydroxysteroid (17-beta) dehydrogenase 4, EHHADH - enoyl-coa, hydratase/3-hydroxyacyl coa dehydrogenase, AMACR - alpha-methylacyl-coa racemase, ABCD1 - atp-binding cassette, sub-family d (ald), member 1]
GO:0006644	phospholipid metabolic process	1.75e-05	0.00667	2.28	7556	232	429	30	[ANGPTL3 - angiopoietin-like 3, KLB - klotho beta, SPTLC2 - serine palmitoyltransferase, long chain base subunit 2, ETNK2 - ethanolamine kinase 2, LPIN1 - lipin 1, CEPT1 - choline/ethanolamine phosphotransferase 1, EGFR - epidermal growth factor receptor, RAB14 - rab14, member ras oncogene family, GPLD1 - glycosylphosphatidylinositol specific phospholipase d1, HADHA - hydroxyacyl-coa dehydrogenas…
GO:0016053	organic acid biosynthetic process	2.11e-05	0.00781	2.74	7556	135	429	21	[ACOX2 - acyl-coa oxidase 2, branched chain, PRKAB1 - protein kinase, amp-activated, beta 1 non-catalytic subunit, CPS1 - carbamoyl-phosphate synthase 1, mitochondrial, HSD17B4 - hydroxysteroid (17-beta) dehydrogenase 4, ALDH8A1 - aldehyde dehydrogenase 8 family, member a1, GLS2 - glutaminase 2 (liver, mitochondrial), PYCRL - pyrroline-5-carboxylate reductase-like, AMACR - alpha-methylacyl-coa ra…
GO:0046394	carboxylic acid biosynthetic process	2.11e-05	0.00759	2.74	7556	135	429	21	[ACOX2 - acyl-coa oxidase 2, branched chain, PRKAB1 - protein kinase, amp-activated, beta 1 non-catalytic subunit, CPS1 - carbamoyl-phosphate synthase 1, mitochondrial, HSD17B4 - hydroxysteroid (17-beta) dehydrogenase 4, ALDH8A1 - aldehyde dehydrogenase 8 family, member a1, GLS2 - glutaminase 2 (liver, mitochondrial), PYCRL - pyrroline-5-carboxylate reductase-like, AMACR - alpha-methylacyl-coa ra…
GO:0008610	lipid biosynthetic process	2.47e-05	0.00865	2.06	7556	308	429	36	[ACOX2 - acyl-coa oxidase 2, branched chain, SGPL1 - sphingosine-1-phosphate lyase 1, PRKAB1 - protein kinase, amp-activated, beta 1 non-catalytic subunit, HSD17B4 - hydroxysteroid (17-beta) dehydrogenase 4, ALDH8A1 - aldehyde dehydrogenase 8 family, member a1, KLB - klotho beta, SPTLC2 - serine palmitoyltransferase, long chain base subunit 2, ETNK2 - ethanolamine kinase 2, LPIN1 - lipin 1, AMACR…
GO:0008152	metabolic process	5.44e-05	0.0185	1.15	7556	4395	429	288	[MARK2 - map/microtubule affinity-regulating kinase 2, NCBP1 - nuclear cap binding protein subunit 1, 80kda, EXOSC9 - exosome component 9, HSD17B4 - hydroxysteroid (17-beta) dehydrogenase 4, RNF43 - ring finger protein 43, NDUFAF6 - nadh dehydrogenase (ubiquinone) complex i, assembly factor 6, SUCLG1 - succinate-coa ligase, alpha subunit, NDUFA6 - nadh dehydrogenase (ubiquinone) 1 alpha subcomple…
GO:0015711	organic anion transport	5.56e-05	0.0184	2.25	7556	211	429	27	[TMEM30A - transmembrane protein 30a, SLC2A9 - solute carrier family 2 (facilitated glucose transporter), member 9, SLC7A2 - solute carrier family 7 (cationic amino acid transporter, y+ system), member 2, ABCB11 - atp-binding cassette, sub-family b (mdr/tap), member 11, CA3 - carbonic anhydrase iii, muscle specific, LDLR - low density lipoprotein receptor, SLC10A1 - solute carrier family 10 (sodi…
GO:0044237	cellular metabolic process	7.74e-05	0.025	1.17	7556	4047	429	268	[MARK2 - map/microtubule affinity-regulating kinase 2, NCBP1 - nuclear cap binding protein subunit 1, 80kda, EXOSC9 - exosome component 9, HSD17B4 - hydroxysteroid (17-beta) dehydrogenase 4, RNF43 - ring finger protein 43, SUCLG1 - succinate-coa ligase, alpha subunit, NDUFA6 - nadh dehydrogenase (ubiquinone) 1 alpha subcomplex, 6, 14kda, WHSC1L1 - wolf-hirschhorn syndrome candidate 1-like 1, SPP2…
GO:0016491	oxidoreductase activity	1.57e-09	5.69e-06	2.52	7556	335	429	48	[OXR1 - oxidation resistance 1, ACOX2 - acyl-coa oxidase 2, branched chain, ACOX3 - acyl-coa oxidase 3, pristanoyl, HSD17B4 - hydroxysteroid (17-beta) dehydrogenase 4, ALDH8A1 - aldehyde dehydrogenase 8 family, member a1, PYCRL - pyrroline-5-carboxylate reductase-like, NDUFA6 - nadh dehydrogenase (ubiquinone) 1 alpha subcomplex, 6, 14kda, FMO1 - flavin containing monooxygenase 1, PNPO - pyridoxam…
GO:0048037	cofactor binding	3.92e-09	7.09e-06	3.5	7556	141	429	28	[ACOX2 - acyl-coa oxidase 2, branched chain, ACOX3 - acyl-coa oxidase 3, pristanoyl, SGPL1 - sphingosine-1-phosphate lyase 1, SPTLC2 - serine palmitoyltransferase, long chain base subunit 2, SUCLG1 - succinate-coa ligase, alpha subunit, FMO1 - flavin containing monooxygenase 1, PNPO - pyridoxamine 5'-phosphate oxidase, HADH - hydroxyacyl-coa dehydrogenase, SIRT5 - sirtuin 5, GCLC - glutamate-cyst…
GO:0050662	coenzyme binding	9.64e-09	1.16e-05	3.93	7556	103	429	23	[ACAD11 - acyl-coa dehydrogenase family, member 11, ACAD8 - acyl-coa dehydrogenase family, member 8, ACOX2 - acyl-coa oxidase 2, branched chain, ACOX3 - acyl-coa oxidase 3, pristanoyl, DBI - diazepam binding inhibitor (gaba receptor modulator, acyl-coa binding protein), FMO1 - flavin containing monooxygenase 1, NDOR1 - nadph dependent diflavin oxidoreductase 1, HACL1 - 2-hydroxyacyl-coa lyase 1, …
GO:0003824	catalytic activity	5.9e-08	5.33e-05	1.32	7556	2906	429	218	[MARK2 - map/microtubule affinity-regulating kinase 2, EXOSC9 - exosome component 9, HSD17B4 - hydroxysteroid (17-beta) dehydrogenase 4, RNF43 - ring finger protein 43, NDUFAF6 - nadh dehydrogenase (ubiquinone) complex i, assembly factor 6, SUCLG1 - succinate-coa ligase, alpha subunit, NDUFA6 - nadh dehydrogenase (ubiquinone) 1 alpha subcomplex, 6, 14kda, WHSC1L1 - wolf-hirschhorn syndrome candid…
GO:0050660	flavin adenine dinucleotide binding	2.74e-06	0.00198	4.58	7556	50	429	13	[ACAD11 - acyl-coa dehydrogenase family, member 11, ACOX2 - acyl-coa oxidase 2, branched chain, ACAD8 - acyl-coa dehydrogenase family, member 8, ACOX3 - acyl-coa oxidase 3, pristanoyl, FMO1 - flavin containing monooxygenase 1, NDOR1 - nadph dependent diflavin oxidoreductase 1, ACADL - acyl-coa dehydrogenase, long chain, DDO - d-aspartate oxidase, KDM1B - lysine (k)-specific demethylase 1b, PPOX -…
GO:0005319	lipid transporter activity	1.11e-05	0.00672	3.62	7556	73	429	15	[TMEM30A - transmembrane protein 30a, NPC1 - niemann-pick disease, type c1, ATP11B - atpase, class vi, type 11b, TMEM30B - transmembrane protein 30b, ABCB11 - atp-binding cassette, sub-family b (mdr/tap), member 11, OSBPL1A - oxysterol binding protein-like 1a, SLC10A1 - solute carrier family 10 (sodium/bile acid cotransporter), member 1, COL4A3BP - collagen, type iv, alpha 3 (goodpasture antigen)…
GO:0003995	acyl-CoA dehydrogenase activity	1.17e-05	0.00605	9.61	7556	11	429	6	[ACAD11 - acyl-coa dehydrogenase family, member 11, ACAD8 - acyl-coa dehydrogenase family, member 8, ACOX2 - acyl-coa oxidase 2, branched chain, ACOX3 - acyl-coa oxidase 3, pristanoyl, ACADL - acyl-coa dehydrogenase, long chain, ACADM - acyl-coa dehydrogenase, c-4 to c-12 straight chain]
GO:0016627	oxidoreductase activity, acting on the CH-CH group of donors	6.4e-05	0.0289	4.8	7556	33	429	9	[ACAD11 - acyl-coa dehydrogenase family, member 11, ACAD8 - acyl-coa dehydrogenase family, member 8, ACOX2 - acyl-coa oxidase 2, branched chain, ACOX3 - acyl-coa oxidase 3, pristanoyl, ZADH2 - zinc binding alcohol dehydrogenase domain containing 2, ACADL - acyl-coa dehydrogenase, long chain, PPOX - protoporphyrinogen oxidase, ACADM - acyl-coa dehydrogenase, c-4 to c-12 straight chain, C6orf57 - c…
GO:0044438	microbody part	2.86e-11	4.61e-08	6.31	7556	53	429	19	[ACOX2 - acyl-coa oxidase 2, branched chain, PEX7 - peroxisomal biogenesis factor 7, ACOX3 - acyl-coa oxidase 3, pristanoyl, HSD17B4 - hydroxysteroid (17-beta) dehydrogenase 4, EHHADH - enoyl-coa, hydratase/3-hydroxyacyl coa dehydrogenase, AMACR - alpha-methylacyl-coa racemase, PEX1 - peroxisomal biogenesis factor 1, IDE - insulin-degrading enzyme, TMEM135 - transmembrane protein 135, PEX3 - pero…
GO:0044439	peroxisomal part	2.86e-11	2.31e-08	6.31	7556	53	429	19	[ACOX2 - acyl-coa oxidase 2, branched chain, PEX7 - peroxisomal biogenesis factor 7, ACOX3 - acyl-coa oxidase 3, pristanoyl, HSD17B4 - hydroxysteroid (17-beta) dehydrogenase 4, EHHADH - enoyl-coa, hydratase/3-hydroxyacyl coa dehydrogenase, AMACR - alpha-methylacyl-coa racemase, PEX1 - peroxisomal biogenesis factor 1, IDE - insulin-degrading enzyme, TMEM135 - transmembrane protein 135, PEX3 - pero…
GO:0042579	microbody	4.86e-11	2.62e-08	5.52	7556	67	429	21	[ACAD11 - acyl-coa dehydrogenase family, member 11, ACOX2 - acyl-coa oxidase 2, branched chain, PEX7 - peroxisomal biogenesis factor 7, ACOX3 - acyl-coa oxidase 3, pristanoyl, HSD17B4 - hydroxysteroid (17-beta) dehydrogenase 4, EHHADH - enoyl-coa, hydratase/3-hydroxyacyl coa dehydrogenase, AMACR - alpha-methylacyl-coa racemase, GBF1 - golgi brefeldin a resistant guanine nucleotide exchange factor…
GO:0005777	peroxisome	6.05e-11	2.45e-08	6.08	7556	55	429	19	[ACAD11 - acyl-coa dehydrogenase family, member 11, PEX7 - peroxisomal biogenesis factor 7, ACOX2 - acyl-coa oxidase 2, branched chain, ACOX3 - acyl-coa oxidase 3, pristanoyl, HSD17B4 - hydroxysteroid (17-beta) dehydrogenase 4, EHHADH - enoyl-coa, hydratase/3-hydroxyacyl coa dehydrogenase, AMACR - alpha-methylacyl-coa racemase, GBF1 - golgi brefeldin a resistant guanine nucleotide exchange factor…
GO:0005782	peroxisomal matrix	9.12e-10	2.95e-07	8.18	7556	28	429	13	[ACOX2 - acyl-coa oxidase 2, branched chain, PEX7 - peroxisomal biogenesis factor 7, ACOX3 - acyl-coa oxidase 3, pristanoyl, HSD17B4 - hydroxysteroid (17-beta) dehydrogenase 4, EHHADH - enoyl-coa, hydratase/3-hydroxyacyl coa dehydrogenase, AMACR - alpha-methylacyl-coa racemase, IDE - insulin-degrading enzyme, HACL1 - 2-hydroxyacyl-coa lyase 1, NUDT19 - nudix (nucleoside diphosphate linked moiety …
GO:0031907	microbody lumen	9.12e-10	2.46e-07	8.18	7556	28	429	13	[ACOX2 - acyl-coa oxidase 2, branched chain, PEX7 - peroxisomal biogenesis factor 7, ACOX3 - acyl-coa oxidase 3, pristanoyl, HSD17B4 - hydroxysteroid (17-beta) dehydrogenase 4, EHHADH - enoyl-coa, hydratase/3-hydroxyacyl coa dehydrogenase, AMACR - alpha-methylacyl-coa racemase, IDE - insulin-degrading enzyme, HACL1 - 2-hydroxyacyl-coa lyase 1, NUDT19 - nudix (nucleoside diphosphate linked moiety …
GO:0044432	endoplasmic reticulum part	1.9e-05	0.0044	1.68	7556	672	429	64	[ERAP1 - endoplasmic reticulum aminopeptidase 1, TMEM38B - transmembrane protein 38b, RNF43 - ring finger protein 43, CDH2 - cadherin 2, type 1, n-cadherin (neuronal), SPP2 - secreted phosphoprotein 2, 24kda, FMO1 - flavin containing monooxygenase 1, TMEM33 - transmembrane protein 33, TMEM97 - transmembrane protein 97, ATL2 - atlastin gtpase 2, CREB3L2 - camp responsive element binding protein 3-…
GO:0005789	endoplasmic reticulum membrane	3.11e-05	0.00629	1.81	7556	478	429	49	[ERAP1 - endoplasmic reticulum aminopeptidase 1, RNF43 - ring finger protein 43, TMEM38B - transmembrane protein 38b, FMO1 - flavin containing monooxygenase 1, TMEM33 - transmembrane protein 33, TMEM97 - transmembrane protein 97, CREB3L2 - camp responsive element binding protein 3-like 2, ATL2 - atlastin gtpase 2, AGPAT3 - 1-acylglycerol-3-phosphate o-acyltransferase 3, CREB3L3 - camp responsive …
GO:0043233	organelle lumen	3.53e-05	0.00633	1.7	7556	602	429	58	[ERAP1 - endoplasmic reticulum aminopeptidase 1, HSD17B4 - hydroxysteroid (17-beta) dehydrogenase 4, TDRD7 - tudor domain containing 7, SUCLG1 - succinate-coa ligase, alpha subunit, CDH2 - cadherin 2, type 1, n-cadherin (neuronal), SPP2 - secreted phosphoprotein 2, 24kda, AMACR - alpha-methylacyl-coa racemase, FMO1 - flavin containing monooxygenase 1, AASS - aminoadipate-semialdehyde synthase, OT…
GO:0070013	intracellular organelle lumen	3.53e-05	0.0057	1.7	7556	602	429	58	[ERAP1 - endoplasmic reticulum aminopeptidase 1, HSD17B4 - hydroxysteroid (17-beta) dehydrogenase 4, TDRD7 - tudor domain containing 7, SUCLG1 - succinate-coa ligase, alpha subunit, CDH2 - cadherin 2, type 1, n-cadherin (neuronal), SPP2 - secreted phosphoprotein 2, 24kda, AMACR - alpha-methylacyl-coa racemase, FMO1 - flavin containing monooxygenase 1, AASS - aminoadipate-semialdehyde synthase, OT…
GO:0031974	membrane-enclosed lumen	3.53e-05	0.00518	1.7	7556	602	429	58	[ERAP1 - endoplasmic reticulum aminopeptidase 1, HSD17B4 - hydroxysteroid (17-beta) dehydrogenase 4, TDRD7 - tudor domain containing 7, SUCLG1 - succinate-coa ligase, alpha subunit, CDH2 - cadherin 2, type 1, n-cadherin (neuronal), SPP2 - secreted phosphoprotein 2, 24kda, AMACR - alpha-methylacyl-coa racemase, FMO1 - flavin containing monooxygenase 1, AASS - aminoadipate-semialdehyde synthase, OT…

## Sheet: Rodent downregulated, liver
GO Term	Description	P-value	FDR q-value	Enrichment	N	B	n	b	Genes
GO:0002376	immune system process	5.29e-09	6.67e-05	1.95	7556	907	316	74	[EMP2 - epithelial membrane protein 2, DHX58 - dexh (asp-glu-x-his) box polypeptide 58, LGMN - legumain, ATP1B1 - atpase, na+/k+ transporting, beta 1 polypeptide, ELMO1 - engulfment and cell motility 1, IQGAP1 - iq motif containing gtpase activating protein 1, CASP8 - caspase 8, apoptosis-related cysteine peptidase, EP300 - e1a binding protein p300, LCP2 - lymphocyte cytosolic protein 2 (sh2 doma…
GO:0010033	response to organic substance	7.34e-08	0.000462	1.84	7556	964	316	74	[PRKAA1 - protein kinase, amp-activated, alpha 1 catalytic subunit, TIMP3 - timp metallopeptidase inhibitor 3, ELK1 - elk1, member of ets oncogene family, ADAMTS13 - adam metallopeptidase with thrombospondin type 1 motif, 13, PPP1R9B - protein phosphatase 1, regulatory subunit 9b, IQGAP1 - iq motif containing gtpase activating protein 1, CASP8 - caspase 8, apoptosis-related cysteine peptidase, CD…
GO:0002684	positive regulation of immune system process	1.66e-07	0.000697	2.37	7556	414	316	41	[FGG - fibrinogen gamma chain, DHX58 - dexh (asp-glu-x-his) box polypeptide 58, LGMN - legumain, FZD5 - frizzled family receptor 5, JUN - jun proto-oncogene, NCK2 - nck adaptor protein 2, ELMO1 - engulfment and cell motility 1, FES - feline sarcoma oncogene, CASP8 - caspase 8, apoptosis-related cysteine peptidase, CD14 - cd14 molecule, LCP2 - lymphocyte cytosolic protein 2 (sh2 domain containing …
GO:0033993	response to lipid	3.74e-07	0.00118	2.47	7556	349	316	36	[PRKAA1 - protein kinase, amp-activated, alpha 1 catalytic subunit, DDIT4 - dna-damage-inducible transcript 4, ELK1 - elk1, member of ets oncogene family, JUN - jun proto-oncogene, ADAMTS13 - adam metallopeptidase with thrombospondin type 1 motif, 13, COL1A1 - collagen, type i, alpha 1, PPARGC1A - peroxisome proliferator-activated receptor gamma, coactivator 1 alpha, CASP8 - caspase 8, apoptosis-…
GO:0007165	signal transduction	5.75e-07	0.00145	1.48	7556	1939	316	120	[FAM13A - family with sequence similarity 13, member a, LGMN - legumain, GADD45A - growth arrest and dna-damage-inducible, alpha, WLS - wntless homolog (drosophila), ELMO1 - engulfment and cell motility 1, IQGAP1 - iq motif containing gtpase activating protein 1, LCP2 - lymphocyte cytosolic protein 2 (sh2 domain containing leukocyte protein of 76kda), EP300 - e1a binding protein p300, PLEKHH3 - p…
GO:0048584	positive regulation of response to stimulus	6.15e-07	0.00129	1.76	7556	978	316	72	[EMP2 - epithelial membrane protein 2, PRKAA1 - protein kinase, amp-activated, alpha 1 catalytic subunit, DHX58 - dexh (asp-glu-x-his) box polypeptide 58, TIMP3 - timp metallopeptidase inhibitor 3, LGMN - legumain, GADD45A - growth arrest and dna-damage-inducible, alpha, WLS - wntless homolog (drosophila), ELMO1 - engulfment and cell motility 1, IQGAP1 - iq motif containing gtpase activating prot…
GO:0048583	regulation of response to stimulus	7.17e-07	0.00129	1.49	7556	1841	316	115	[EMP2 - epithelial membrane protein 2, DHX58 - dexh (asp-glu-x-his) box polypeptide 58, FAM13A - family with sequence similarity 13, member a, LGMN - legumain, GADD45A - growth arrest and dna-damage-inducible, alpha, WLS - wntless homolog (drosophila), ELMO1 - engulfment and cell motility 1, IQGAP1 - iq motif containing gtpase activating protein 1, LCP2 - lymphocyte cytosolic protein 2 (sh2 domai…
GO:1902041	regulation of extrinsic apoptotic signaling pathway via death domain receptors	7.61e-07	0.0012	7.03	7556	34	316	10	[FGG - fibrinogen gamma chain, TMBIM1 - transmembrane bax inhibitor motif containing 1, CASP8 - caspase 8, apoptosis-related cysteine peptidase, TIMP3 - timp metallopeptidase inhibitor 3, TNFAIP3 - tumor necrosis factor, alpha-induced protein 3, THBS1 - thrombospondin 1, SERPINE1 - serpin peptidase inhibitor, clade e (nexin, plasminogen activator inhibitor type 1), member 1, FEM1B - fem-1 homolog…
GO:0002682	regulation of immune system process	8.48e-07	0.00119	1.99	7556	624	316	52	[DHX58 - dexh (asp-glu-x-his) box polypeptide 58, LGMN - legumain, ELMO1 - engulfment and cell motility 1, CASP8 - caspase 8, apoptosis-related cysteine peptidase, EP300 - e1a binding protein p300, LCP2 - lymphocyte cytosolic protein 2 (sh2 domain containing leukocyte protein of 76kda), SPI1 - spleen focus forming virus (sffv) proviral integration oncogene, MSH6 - muts homolog 6 (e. coli), ZBTB16…
GO:0071310	cellular response to organic substance	1.06e-06	0.00134	2.01	7556	594	316	50	[PRKAA1 - protein kinase, amp-activated, alpha 1 catalytic subunit, TIMP3 - timp metallopeptidase inhibitor 3, ELK1 - elk1, member of ets oncogene family, ADAMTS13 - adam metallopeptidase with thrombospondin type 1 motif, 13, PPP1R9B - protein phosphatase 1, regulatory subunit 9b, IQGAP1 - iq motif containing gtpase activating protein 1, CASP8 - caspase 8, apoptosis-related cysteine peptidase, SP…
GO:0048518	positive regulation of biological process	2.04e-06	0.00234	1.36	7556	2598	316	148	[EMP2 - epithelial membrane protein 2, DHX58 - dexh (asp-glu-x-his) box polypeptide 58, LGMN - legumain, ELK1 - elk1, member of ets oncogene family, GADD45A - growth arrest and dna-damage-inducible, alpha, WLS - wntless homolog (drosophila), ELMO1 - engulfment and cell motility 1, IQGAP1 - iq motif containing gtpase activating protein 1, LCP2 - lymphocyte cytosolic protein 2 (sh2 domain containin…
GO:0010941	regulation of cell death	2.2e-06	0.00231	1.83	7556	769	316	59	[PRKAA1 - protein kinase, amp-activated, alpha 1 catalytic subunit, TIMP3 - timp metallopeptidase inhibitor 3, LGMN - legumain, ELK1 - elk1, member of ets oncogene family, GADD45A - growth arrest and dna-damage-inducible, alpha, CASP8 - caspase 8, apoptosis-related cysteine peptidase, NOTCH2 - notch 2, GPNMB - glycoprotein (transmembrane) nmb, ZBTB16 - zinc finger and btb domain containing 16, MA…
GO:0023051	regulation of signaling	2.87e-06	0.00278	1.51	7556	1617	316	102	[EMP2 - epithelial membrane protein 2, DHX58 - dexh (asp-glu-x-his) box polypeptide 58, LGMN - legumain, FAM13A - family with sequence similarity 13, member a, GADD45A - growth arrest and dna-damage-inducible, alpha, WLS - wntless homolog (drosophila), IQGAP1 - iq motif containing gtpase activating protein 1, EP300 - e1a binding protein p300, FARP1 - ferm, rhogef (arhgef) and pleckstrin domain pr…
GO:0043066	negative regulation of apoptotic process	4.68e-06	0.00421	2.22	7556	388	316	36	[TEK - tek tyrosine kinase, endothelial, PRKAA1 - protein kinase, amp-activated, alpha 1 catalytic subunit, FGG - fibrinogen gamma chain, LGMN - legumain, JUN - jun proto-oncogene, ADAR - adenosine deaminase, rna-specific, BTG2 - btg family, member 2, PPARGC1A - peroxisome proliferator-activated receptor gamma, coactivator 1 alpha, CASP8 - caspase 8, apoptosis-related cysteine peptidase, PDK4 - p…
GO:0010646	regulation of cell communication	5.04e-06	0.00424	1.5	7556	1595	316	100	[EMP2 - epithelial membrane protein 2, DHX58 - dexh (asp-glu-x-his) box polypeptide 58, LGMN - legumain, FAM13A - family with sequence similarity 13, member a, GADD45A - growth arrest and dna-damage-inducible, alpha, WLS - wntless homolog (drosophila), IQGAP1 - iq motif containing gtpase activating protein 1, EP300 - e1a binding protein p300, FARP1 - ferm, rhogef (arhgef) and pleckstrin domain pr…
GO:0043069	negative regulation of programmed cell death	7.03e-06	0.00554	2.18	7556	395	316	36	[TEK - tek tyrosine kinase, endothelial, PRKAA1 - protein kinase, amp-activated, alpha 1 catalytic subunit, FGG - fibrinogen gamma chain, LGMN - legumain, JUN - jun proto-oncogene, ADAR - adenosine deaminase, rna-specific, BTG2 - btg family, member 2, PPARGC1A - peroxisome proliferator-activated receptor gamma, coactivator 1 alpha, CASP8 - caspase 8, apoptosis-related cysteine peptidase, PDK4 - p…
GO:0070887	cellular response to chemical stimulus	7.95e-06	0.00589	1.81	7556	727	316	55	[PRKAA1 - protein kinase, amp-activated, alpha 1 catalytic subunit, TIMP3 - timp metallopeptidase inhibitor 3, ELK1 - elk1, member of ets oncogene family, PPP1R9B - protein phosphatase 1, regulatory subunit 9b, ADAMTS13 - adam metallopeptidase with thrombospondin type 1 motif, 13, IQGAP1 - iq motif containing gtpase activating protein 1, CASP8 - caspase 8, apoptosis-related cysteine peptidase, SP…
GO:0042221	response to chemical	8.65e-06	0.00606	1.58	7556	1207	316	80	[SLC6A11 - solute carrier family 6 (neurotransmitter transporter), member 11, PRKAA1 - protein kinase, amp-activated, alpha 1 catalytic subunit, TIMP3 - timp metallopeptidase inhibitor 3, ELK1 - elk1, member of ets oncogene family, PPP1R9B - protein phosphatase 1, regulatory subunit 9b, ADAMTS13 - adam metallopeptidase with thrombospondin type 1 motif, 13, PTPRM - protein tyrosine phosphatase, re…
GO:0042981	regulation of apoptotic process	8.71e-06	0.00578	1.82	7556	711	316	54	[PRKAA1 - protein kinase, amp-activated, alpha 1 catalytic subunit, LGMN - legumain, TIMP3 - timp metallopeptidase inhibitor 3, GADD45A - growth arrest and dna-damage-inducible, alpha, CASP8 - caspase 8, apoptosis-related cysteine peptidase, MAP4K4 - mitogen-activated protein kinase kinase kinase kinase 4, ZBTB16 - zinc finger and btb domain containing 16, NOTCH2 - notch 2, ID1 - inhibitor of dna…
GO:0060548	negative regulation of cell death	9.33e-06	0.00588	2.1	7556	433	316	38	[TEK - tek tyrosine kinase, endothelial, PRKAA1 - protein kinase, amp-activated, alpha 1 catalytic subunit, FGG - fibrinogen gamma chain, LGMN - legumain, JUN - jun proto-oncogene, ADAR - adenosine deaminase, rna-specific, BTG2 - btg family, member 2, PPARGC1A - peroxisome proliferator-activated receptor gamma, coactivator 1 alpha, CASP8 - caspase 8, apoptosis-related cysteine peptidase, PDK4 - p…
GO:1901700	response to oxygen-containing compound	9.96e-06	0.00598	1.86	7556	642	316	50	[PRKAA1 - protein kinase, amp-activated, alpha 1 catalytic subunit, ELK1 - elk1, member of ets oncogene family, ADAMTS13 - adam metallopeptidase with thrombospondin type 1 motif, 13, IQGAP1 - iq motif containing gtpase activating protein 1, CASP8 - caspase 8, apoptosis-related cysteine peptidase, SPI1 - spleen focus forming virus (sffv) proviral integration oncogene, MAPKAPK3 - mitogen-activated …
GO:0043067	regulation of programmed cell death	1.07e-05	0.00612	1.8	7556	716	316	54	[PRKAA1 - protein kinase, amp-activated, alpha 1 catalytic subunit, LGMN - legumain, TIMP3 - timp metallopeptidase inhibitor 3, GADD45A - growth arrest and dna-damage-inducible, alpha, CASP8 - caspase 8, apoptosis-related cysteine peptidase, MAP4K4 - mitogen-activated protein kinase kinase kinase kinase 4, ZBTB16 - zinc finger and btb domain containing 16, NOTCH2 - notch 2, ID1 - inhibitor of dna…
GO:0022603	regulation of anatomical structure morphogenesis	1.82e-05	0.00997	1.97	7556	497	316	41	[TEK - tek tyrosine kinase, endothelial, EMP2 - epithelial membrane protein 2, FGG - fibrinogen gamma chain, FZD5 - frizzled family receptor 5, PTPRM - protein tyrosine phosphatase, receptor type, m, PPARGC1A - peroxisome proliferator-activated receptor gamma, coactivator 1 alpha, FES - feline sarcoma oncogene, ETS1 - v-ets avian erythroblastosis virus e26 oncogene homolog 1, DPYSL2 - dihydropyri…
GO:0050776	regulation of immune response	1.96e-05	0.0103	2.11	7556	397	316	35	[FGG - fibrinogen gamma chain, DHX58 - dexh (asp-glu-x-his) box polypeptide 58, LGMN - legumain, FZD5 - frizzled family receptor 5, JUN - jun proto-oncogene, COL1A1 - collagen, type i, alpha 1, ADAR - adenosine deaminase, rna-specific, ELMO1 - engulfment and cell motility 1, FES - feline sarcoma oncogene, CASP8 - caspase 8, apoptosis-related cysteine peptidase, CD14 - cd14 molecule, LCP2 - lympho…
GO:0050793	regulation of developmental process	2.17e-05	0.0109	1.58	7556	1137	316	75	[EMP2 - epithelial membrane protein 2, PRKAA1 - protein kinase, amp-activated, alpha 1 catalytic subunit, LGMN - legumain, PTPRM - protein tyrosine phosphatase, receptor type, m, FST - follistatin, IQGAP1 - iq motif containing gtpase activating protein 1, CASP8 - caspase 8, apoptosis-related cysteine peptidase, EP300 - e1a binding protein p300, CLSTN1 - calsyntenin 1, SPI1 - spleen focus forming …
GO:0009725	response to hormone	2.28e-05	0.0111	2.33	7556	287	316	28	[PRKAA1 - protein kinase, amp-activated, alpha 1 catalytic subunit, TEK - tek tyrosine kinase, endothelial, DDIT4 - dna-damage-inducible transcript 4, JUN - jun proto-oncogene, IRS1 - insulin receptor substrate 1, COL1A1 - collagen, type i, alpha 1, BTG2 - btg family, member 2, PPARGC1A - peroxisome proliferator-activated receptor gamma, coactivator 1 alpha, IQGAP1 - iq motif containing gtpase ac…
GO:0034097	response to cytokine	2.42e-05	0.0113	2.53	7556	227	316	24	[CSF1R - colony stimulating factor 1 receptor, FGG - fibrinogen gamma chain, MAPKAPK3 - mitogen-activated protein kinase-activated protein kinase 3, PCK2 - phosphoenolpyruvate carboxykinase 2 (mitochondrial), CORO1A - coronin, actin binding protein, 1a, JUN - jun proto-oncogene, ADAMTS13 - adam metallopeptidase with thrombospondin type 1 motif, 13, IL1R1 - interleukin 1 receptor, type i, ARHGEF2 …
GO:0040011	locomotion	2.88e-05	0.0129	2.04	7556	421	316	36	[TEK - tek tyrosine kinase, endothelial, NUP188 - nucleoporin 188kda, EMP2 - epithelial membrane protein 2, DDIT4 - dna-damage-inducible transcript 4, IGJ - immunoglobulin j polypeptide, linker protein for immunoglobulin alpha and mu polypeptides, NCK2 - nck adaptor protein 2, PPP1R9B - protein phosphatase 1, regulatory subunit 9b, ITGA1 - integrin, alpha 1, ATP1B1 - atpase, na+/k+ transporting, …
GO:1902042	negative regulation of extrinsic apoptotic signaling pathway via death domain receptors	2.88e-05	0.0125	7.28	7556	23	316	7	[FGG - fibrinogen gamma chain, CASP8 - caspase 8, apoptosis-related cysteine peptidase, TMBIM1 - transmembrane bax inhibitor motif containing 1, TNFAIP3 - tumor necrosis factor, alpha-induced protein 3, SERPINE1 - serpin peptidase inhibitor, clade e (nexin, plasminogen activator inhibitor type 1), member 1, TNFSF10 - tumor necrosis factor (ligand) superfamily, member 10, ARHGEF2 - rho/rac guanine…
GO:0050896	response to stimulus	3.16e-05	0.0133	1.36	7556	2157	316	123	[EMP2 - epithelial membrane protein 2, DHX58 - dexh (asp-glu-x-his) box polypeptide 58, LGMN - legumain, ELK1 - elk1, member of ets oncogene family, GADD45A - growth arrest and dna-damage-inducible, alpha, IQGAP1 - iq motif containing gtpase activating protein 1, LCP2 - lymphocyte cytosolic protein 2 (sh2 domain containing leukocyte protein of 76kda), EP300 - e1a binding protein p300, SPI1 - sple…
GO:0045765	regulation of angiogenesis	3.22e-05	0.0131	3.08	7556	132	316	17	[TEK - tek tyrosine kinase, endothelial, EMP2 - epithelial membrane protein 2, ID1 - inhibitor of dna binding 1, dominant negative helix-loop-helix protein, NGFR - nerve growth factor receptor, PLXND1 - plexin d1, COL4A2 - collagen, type iv, alpha 2, PTPRM - protein tyrosine phosphatase, receptor type, m, LRG1 - leucine-rich alpha-2-glycoprotein 1, THBS1 - thrombospondin 1, TNFAIP3 - tumor necros…
GO:0006928	movement of cell or subcellular component	3.38e-05	0.0133	1.85	7556	581	316	45	[SUN1 - sad1 and unc84 domain containing 1, NUP188 - nucleoporin 188kda, TEK - tek tyrosine kinase, endothelial, EMP2 - epithelial membrane protein 2, DDIT4 - dna-damage-inducible transcript 4, IGJ - immunoglobulin j polypeptide, linker protein for immunoglobulin alpha and mu polypeptides, IGSF8 - immunoglobulin superfamily, member 8, NCK2 - nck adaptor protein 2, PPP1R9B - protein phosphatase 1,…
GO:0009966	regulation of signal transduction	3.78e-05	0.0144	1.47	7556	1481	316	91	[EMP2 - epithelial membrane protein 2, PRKAA1 - protein kinase, amp-activated, alpha 1 catalytic subunit, PRKAB2 - protein kinase, amp-activated, beta 2 non-catalytic subunit, DHX58 - dexh (asp-glu-x-his) box polypeptide 58, TIMP3 - timp metallopeptidase inhibitor 3, FAM13A - family with sequence similarity 13, member a, LGMN - legumain, GADD45A - growth arrest and dna-damage-inducible, alpha, PP…
GO:0002253	activation of immune response	4.91e-05	0.0182	2.54	7556	207	316	22	[CTSK - cathepsin k, FGG - fibrinogen gamma chain, HCK - hemopoietic cell kinase, MAPKAPK3 - mitogen-activated protein kinase-activated protein kinase 3, LGMN - legumain, TNIP1 - tnfaip3 interacting protein 1, C1QB - complement component 1, q subcomponent, b chain, CTSS - cathepsin s, COLEC10 - collectin sub-family member 10 (c-type lectin), C1QC - complement component 1, q subcomponent, c chain,…
GO:0016477	cell migration	4.94e-05	0.0178	2.13	7556	348	316	31	[NUP188 - nucleoporin 188kda, TEK - tek tyrosine kinase, endothelial, EMP2 - epithelial membrane protein 2, DDIT4 - dna-damage-inducible transcript 4, IGJ - immunoglobulin j polypeptide, linker protein for immunoglobulin alpha and mu polypeptides, NCK2 - nck adaptor protein 2, PPP1R9B - protein phosphatase 1, regulatory subunit 9b, ITGA1 - integrin, alpha 1, ATP1B1 - atpase, na+/k+ transporting, …
GO:0050789	regulation of biological process	5.55e-05	0.0194	1.17	7556	4597	316	225	[EMP2 - epithelial membrane protein 2, DHX58 - dexh (asp-glu-x-his) box polypeptide 58, FAM13A - family with sequence similarity 13, member a, ELK1 - elk1, member of ets oncogene family, SF3A1 - splicing factor 3a, subunit 1, 120kda, WLS - wntless homolog (drosophila), IQGAP1 - iq motif containing gtpase activating protein 1, EP300 - e1a binding protein p300, LCP2 - lymphocyte cytosolic protein 2…
GO:0050794	regulation of cellular process	5.6e-05	0.0191	1.18	7556	4370	316	216	[EMP2 - epithelial membrane protein 2, DHX58 - dexh (asp-glu-x-his) box polypeptide 58, FAM13A - family with sequence similarity 13, member a, ELK1 - elk1, member of ets oncogene family, SF3A1 - splicing factor 3a, subunit 1, 120kda, WLS - wntless homolog (drosophila), IQGAP1 - iq motif containing gtpase activating protein 1, EP300 - e1a binding protein p300, LCP2 - lymphocyte cytosolic protein 2…
GO:0043408	regulation of MAPK cascade	5.81e-05	0.0193	2.11	7556	351	316	31	[TEK - tek tyrosine kinase, endothelial, PRKAA1 - protein kinase, amp-activated, alpha 1 catalytic subunit, FGG - fibrinogen gamma chain, TIMP3 - timp metallopeptidase inhibitor 3, FZD5 - frizzled family receptor 5, GADD45B - growth arrest and dna-damage-inducible, beta, JUN - jun proto-oncogene, GADD45A - growth arrest and dna-damage-inducible, alpha, ITGA1 - integrin, alpha 1, IQGAP1 - iq motif…
GO:1904035	regulation of epithelial cell apoptotic process	6e-05	0.0194	5.63	7556	34	316	8	[TEK - tek tyrosine kinase, endothelial, FGG - fibrinogen gamma chain, PPARGC1A - peroxisome proliferator-activated receptor gamma, coactivator 1 alpha, THBS1 - thrombospondin 1, TNFAIP3 - tumor necrosis factor, alpha-induced protein 3, SORT1 - sortilin 1, SERPINE1 - serpin peptidase inhibitor, clade e (nexin, plasminogen activator inhibitor type 1), member 1, TIA1 - tia1 cytotoxic granule-associ…
GO:0048870	cell motility	7.71e-05	0.0243	2.05	7556	373	316	32	[TEK - tek tyrosine kinase, endothelial, NUP188 - nucleoporin 188kda, EMP2 - epithelial membrane protein 2, DDIT4 - dna-damage-inducible transcript 4, IGJ - immunoglobulin j polypeptide, linker protein for immunoglobulin alpha and mu polypeptides, NCK2 - nck adaptor protein 2, PPP1R9B - protein phosphatase 1, regulatory subunit 9b, ITGA1 - integrin, alpha 1, ATP1B1 - atpase, na+/k+ transporting, …
GO:0001775	cell activation	7.89e-05	0.0243	1.93	7556	459	316	37	[FZD5 - frizzled family receptor 5, JUN - jun proto-oncogene, NCK2 - nck adaptor protein 2, ADAMTS13 - adam metallopeptidase with thrombospondin type 1 motif, 13, COL1A1 - collagen, type i, alpha 1, IQGAP1 - iq motif containing gtpase activating protein 1, CASP8 - caspase 8, apoptosis-related cysteine peptidase, CD14 - cd14 molecule, LCP2 - lymphocyte cytosolic protein 2 (sh2 domain containing le…
GO:0048869	cellular developmental process	8.1e-05	0.0243	1.54	7556	1121	316	72	[PURA - purine-rich element binding protein a, ELK1 - elk1, member of ets oncogene family, PPP1R9B - protein phosphatase 1, regulatory subunit 9b, FST - follistatin, IQGAP1 - iq motif containing gtpase activating protein 1, CASP8 - caspase 8, apoptosis-related cysteine peptidase, EP300 - e1a binding protein p300, FARP1 - ferm, rhogef (arhgef) and pleckstrin domain protein 1 (chondrocyte-derived),…
GO:0001932	regulation of protein phosphorylation	8.94e-05	0.0262	1.74	7556	660	316	48	[TEK - tek tyrosine kinase, endothelial, PRKAA1 - protein kinase, amp-activated, alpha 1 catalytic subunit, EMP2 - epithelial membrane protein 2, DDIT4 - dna-damage-inducible transcript 4, FGG - fibrinogen gamma chain, TIMP3 - timp metallopeptidase inhibitor 3, FZD5 - frizzled family receptor 5, GADD45B - growth arrest and dna-damage-inducible, beta, JUN - jun proto-oncogene, NCK2 - nck adaptor p…
GO:0010942	positive regulation of cell death	9.11e-05	0.0261	2.16	7556	310	316	28	[DDIT4 - dna-damage-inducible transcript 4, TIMP3 - timp metallopeptidase inhibitor 3, GADD45B - growth arrest and dna-damage-inducible, beta, JUN - jun proto-oncogene, ELK1 - elk1, member of ets oncogene family, GADD45A - growth arrest and dna-damage-inducible, alpha, NCK2 - nck adaptor protein 2, ITGA1 - integrin, alpha 1, PPARGC1A - peroxisome proliferator-activated receptor gamma, coactivator…
GO:1901216	positive regulation of neuron death	9.29e-05	0.026	5.31	7556	36	316	8	[FOS - fbj murine osteosarcoma viral oncogene homolog, DDIT4 - dna-damage-inducible transcript 4, CASP8 - caspase 8, apoptosis-related cysteine peptidase, SRPK2 - srsf protein kinase 2, ELK1 - elk1, member of ets oncogene family, JUN - jun proto-oncogene, NQO1 - nad(p)h dehydrogenase, quinone 1, ITGA1 - integrin, alpha 1]
GO:1901654	response to ketone	9.42e-05	0.0258	3.42	7556	91	316	13	[PRKAA1 - protein kinase, amp-activated, alpha 1 catalytic subunit, DDIT4 - dna-damage-inducible transcript 4, PCK2 - phosphoenolpyruvate carboxykinase 2 (mitochondrial), AR - androgen receptor, ELK1 - elk1, member of ets oncogene family, CLDN4 - claudin 4, CDKN1A - cyclin-dependent kinase inhibitor 1a (p21, cip1), GNAI1 - guanine nucleotide binding protein (g protein), alpha inhibiting activity …
GO:0060263	regulation of respiratory burst	9.51e-05	0.0255	13.66	7556	7	316	4	[IGJ - immunoglobulin j polypeptide, linker protein for immunoglobulin alpha and mu polypeptides, RAC2 - ras-related c3 botulinum toxin substrate 2 (rho family, small gtp binding protein rac2), DUSP10 - dual specificity phosphatase 10, NOXA1 - nadph oxidase activator 1]
GO:0050900	leukocyte migration	9.89e-05	0.026	3.07	7556	117	316	15	[TEK - tek tyrosine kinase, endothelial, HCK - hemopoietic cell kinase, IGJ - immunoglobulin j polypeptide, linker protein for immunoglobulin alpha and mu polypeptides, CORO1A - coronin, actin binding protein, 1a, CD44 - cd44 molecule (indian blood group), ITGA1 - integrin, alpha 1, ATP1B1 - atpase, na+/k+ transporting, beta 1 polypeptide, COL1A1 - collagen, type i, alpha 1, GYPC - glycophorin c …
GO:0044459	plasma membrane part	2.77e-07	0.000448	1.75	7556	1052	316	77	[SLC6A11 - solute carrier family 6 (neurotransmitter transporter), member 11, EMP2 - epithelial membrane protein 2, PRKAA1 - protein kinase, amp-activated, alpha 1 catalytic subunit, SLC16A13 - solute carrier family 16, member 13, PPP1R9B - protein phosphatase 1, regulatory subunit 9b, WLS - wntless homolog (drosophila), PTPRM - protein tyrosine phosphatase, receptor type, m, ATP1B1 - atpase, na+…
GO:1903561	extracellular vesicle	3.26e-06	0.00263	1.59	7556	1276	316	85	[TIMP3 - timp metallopeptidase inhibitor 3, AEBP1 - ae binding protein 1, LGMN - legumain, PTRHD1 - peptidyl-trna hydrolase domain containing 1, WLS - wntless homolog (drosophila), ATP1B1 - atpase, na+/k+ transporting, beta 1 polypeptide, IQGAP1 - iq motif containing gtpase activating protein 1, CLSTN1 - calsyntenin 1, DPYSL2 - dihydropyrimidinase-like 2, CKAP4 - cytoskeleton-associated protein 4…
GO:0043230	extracellular organelle	3.36e-06	0.00181	1.59	7556	1277	316	85	[TIMP3 - timp metallopeptidase inhibitor 3, AEBP1 - ae binding protein 1, LGMN - legumain, PTRHD1 - peptidyl-trna hydrolase domain containing 1, WLS - wntless homolog (drosophila), ATP1B1 - atpase, na+/k+ transporting, beta 1 polypeptide, IQGAP1 - iq motif containing gtpase activating protein 1, CLSTN1 - calsyntenin 1, DPYSL2 - dihydropyrimidinase-like 2, CKAP4 - cytoskeleton-associated protein 4…
GO:0070062	extracellular exosome	4.78e-06	0.00193	1.58	7556	1268	316	84	[TIMP3 - timp metallopeptidase inhibitor 3, AEBP1 - ae binding protein 1, LGMN - legumain, PTRHD1 - peptidyl-trna hydrolase domain containing 1, WLS - wntless homolog (drosophila), ATP1B1 - atpase, na+/k+ transporting, beta 1 polypeptide, IQGAP1 - iq motif containing gtpase activating protein 1, CLSTN1 - calsyntenin 1, DPYSL2 - dihydropyrimidinase-like 2, CKAP4 - cytoskeleton-associated protein 4…
GO:0044421	extracellular region part	9.7e-06	0.00314	1.47	7556	1639	316	101	[LGMN - legumain, LGALS4 - lectin, galactoside-binding, soluble, 4, WLS - wntless homolog (drosophila), IQGAP1 - iq motif containing gtpase activating protein 1, PLEKHH3 - pleckstrin homology domain containing, family h (with myth4 domain) member 3, CKAP4 - cytoskeleton-associated protein 4, CD37 - cd37 molecule, CD53 - cd53 molecule, TTYH3 - tweety homolog 3 (drosophila), GGH - gamma-glutamyl hy…
GO:0043227	membrane-bounded organelle	1.49e-05	0.00402	1.19	7556	4431	316	221	[EMP2 - epithelial membrane protein 2, ELK1 - elk1, member of ets oncogene family, SLC16A13 - solute carrier family 16, member 13, WLS - wntless homolog (drosophila), IQGAP1 - iq motif containing gtpase activating protein 1, EP300 - e1a binding protein p300, FOXRED1 - fad-dependent oxidoreductase domain containing 1, CKAP4 - cytoskeleton-associated protein 4, GBA2 - glucosidase, beta (bile acid) …
GO:0009986	cell surface	1.94e-05	0.00448	2.56	7556	224	316	24	[CSF1R - colony stimulating factor 1 receptor, TEK - tek tyrosine kinase, endothelial, EMP2 - epithelial membrane protein 2, FGG - fibrinogen gamma chain, NGFR - nerve growth factor receptor, FZD5 - frizzled family receptor 5, SORT1 - sortilin 1, TSPAN15 - tetraspanin 15, CD53 - cd53 molecule, HHIP - hedgehog interacting protein, ADAMTS13 - adam metallopeptidase with thrombospondin type 1 motif, …
GO:0031982	vesicle	2.53e-05	0.00511	1.43	7556	1717	316	103	[EMP2 - epithelial membrane protein 2, GOLIM4 - golgi integral membrane protein 4, LGMN - legumain, EHBP1L1 - eh domain binding protein 1-like 1, WLS - wntless homolog (drosophila), IQGAP1 - iq motif containing gtpase activating protein 1, CKAP4 - cytoskeleton-associated protein 4, CD37 - cd37 molecule, CD53 - cd53 molecule, SYBU - syntabulin (syntaxin-interacting), EHBP1 - eh domain binding prot…
GO:0045121	membrane raft	4.13e-05	0.00741	2.91	7556	148	316	18	[STOM - stomatin, TEK - tek tyrosine kinase, endothelial, EMP2 - epithelial membrane protein 2, HCK - hemopoietic cell kinase, IRS1 - insulin receptor substrate 1, ITGA1 - integrin, alpha 1, ERLIN2 - er lipid raft associated 2, ATP1B1 - atpase, na+/k+ transporting, beta 1 polypeptide, GNAI1 - guanine nucleotide binding protein (g protein), alpha inhibiting activity polypeptide 1, EDNRB - endothel…
GO:0098857	membrane microdomain	4.94e-05	0.00799	2.87	7556	150	316	18	[STOM - stomatin, TEK - tek tyrosine kinase, endothelial, EMP2 - epithelial membrane protein 2, HCK - hemopoietic cell kinase, IRS1 - insulin receptor substrate 1, ITGA1 - integrin, alpha 1, ERLIN2 - er lipid raft associated 2, ATP1B1 - atpase, na+/k+ transporting, beta 1 polypeptide, GNAI1 - guanine nucleotide binding protein (g protein), alpha inhibiting activity polypeptide 1, EDNRB - endothel…
GO:0098590	plasma membrane region	6.39e-05	0.00938	2.02	7556	403	316	34	[TEK - tek tyrosine kinase, endothelial, PRKAA1 - protein kinase, amp-activated, alpha 1 catalytic subunit, EMP2 - epithelial membrane protein 2, IRS1 - insulin receptor substrate 1, SLC9A3R2 - solute carrier family 9, subfamily a (nhe3, cation proton antiporter 3), member 3 regulator 2, PPP1R9B - protein phosphatase 1, regulatory subunit 9b, WLS - wntless homolog (drosophila), ATP1B1 - atpase, n…

## Sheet: Primate downregulated, lung
GO Term	Description	P-value	FDR q-value	Enrichment	N	B	n	b	Genes
GO:0009062	fatty acid catabolic process	8.31e-06	0.11	3.05	8904	52	1011	18	[CPT2 - carnitine palmitoyltransferase 2, PEX7 - peroxisomal biogenesis factor 7, ACAT1 - acetyl-coa acetyltransferase 1, CPT1B - carnitine palmitoyltransferase 1b (muscle), ACAA2 - acetyl-coa acyltransferase 2, ACOT8 - acyl-coa thioesterase 8, GCDH - glutaryl-coa dehydrogenase, NUDT19 - nudix (nucleoside diphosphate linked moiety x)-type motif 19, HADH - hydroxyacyl-coa dehydrogenase, SLC27A4 - …
GO:0006635	fatty acid beta-oxidation	1.84e-05	0.122	3.42	8904	36	1011	14	[CPT2 - carnitine palmitoyltransferase 2, PEX7 - peroxisomal biogenesis factor 7, ACAT1 - acetyl-coa acetyltransferase 1, CPT1B - carnitine palmitoyltransferase 1b (muscle), ACOT8 - acyl-coa thioesterase 8, ACAA2 - acetyl-coa acyltransferase 2, GCDH - glutaryl-coa dehydrogenase, HADH - hydroxyacyl-coa dehydrogenase, ACADL - acyl-coa dehydrogenase, long chain, CRAT - carnitine o-acetyltransferase,…
GO:0009056	catabolic process	2.04e-05	0.0902	1.37	8904	967	1011	150	[RGS19 - regulator of g-protein signaling 19, SNF8 - snf8, escrt-ii complex subunit, EXOSC5 - exosome component 5, PNKD - paroxysmal nonkinesigenic dyskinesia, RNF43 - ring finger protein 43, BCKDK - branched chain ketoacid dehydrogenase kinase, ERLIN1 - er lipid raft associated 1, NAGA - n-acetylgalactosaminidase, alpha-, ARRDC1 - arrestin domain containing 1, PTPN23 - protein tyrosine phosphata…
GO:0055114	oxidation-reduction process	4.02e-05	0.133	1.55	8904	450	1011	79	[XDH - xanthine dehydrogenase, HSD17B8 - hydroxysteroid (17-beta) dehydrogenase 8, ACOT8 - acyl-coa thioesterase 8, ACAA2 - acetyl-coa acyltransferase 2, NOS2 - nitric oxide synthase 2, inducible, MSRB2 - methionine sulfoxide reductase b2, PDIA4 - protein disulfide isomerase family a, member 4, PYCRL - pyrroline-5-carboxylate reductase-like, PGD - phosphogluconate dehydrogenase, NDUFA6 - nadh deh…
GO:0022900	electron transport chain	7.44e-05	0.197	2.64	8904	60	1011	18	[XDH - xanthine dehydrogenase, NDUFB10 - nadh dehydrogenase (ubiquinone) 1 beta subcomplex, 10, 22kda, PINK1 - pten induced putative kinase 1, GPX2 - glutathione peroxidase 2 (gastrointestinal), NDUFA6 - nadh dehydrogenase (ubiquinone) 1 alpha subcomplex, 6, 14kda, NDUFA12 - nadh dehydrogenase (ubiquinone) 1 alpha subcomplex, 12, NDUFA8 - nadh dehydrogenase (ubiquinone) 1 alpha subcomplex, 8, 19k…
GO:0050662	coenzyme binding	1.84e-05	0.069	2.28	8904	108	1011	28	[XDH - xanthine dehydrogenase, HSD17B8 - hydroxysteroid (17-beta) dehydrogenase 8, NOS2 - nitric oxide synthase 2, inducible, ATAT1 - alpha tubulin acetyltransferase 1, FMO1 - flavin containing monooxygenase 1, HADH - hydroxyacyl-coa dehydrogenase, SIRT6 - sirtuin 6, SIRT7 - sirtuin 7, MAOB - monoamine oxidase b, ACADL - acyl-coa dehydrogenase, long chain, SIRT3 - sirtuin 3, CYB5R3 - cytochrome b…
GO:0003954	NADH dehydrogenase activity	2.1e-05	0.0393	6.16	8904	10	1011	7	[NDUFB10 - nadh dehydrogenase (ubiquinone) 1 beta subcomplex, 10, 22kda, NDUFV1 - nadh dehydrogenase (ubiquinone) flavoprotein 1, 51kda, NDUFA6 - nadh dehydrogenase (ubiquinone) 1 alpha subcomplex, 6, 14kda, NDUFS3 - nadh dehydrogenase (ubiquinone) fe-s protein 3, 30kda (nadh-coenzyme q reductase), NDUFA12 - nadh dehydrogenase (ubiquinone) 1 alpha subcomplex, 12, NARFL - nuclear prelamin a recogn…
GO:0016491	oxidoreductase activity	2.86e-05	0.0357	1.65	8904	348	1011	65	[XDH - xanthine dehydrogenase, HSD17B8 - hydroxysteroid (17-beta) dehydrogenase 8, MSRB2 - methionine sulfoxide reductase b2, NOS2 - nitric oxide synthase 2, inducible, PDIA4 - protein disulfide isomerase family a, member 4, PYCRL - pyrroline-5-carboxylate reductase-like, NDUFA6 - nadh dehydrogenase (ubiquinone) 1 alpha subcomplex, 6, 14kda, PGD - phosphogluconate dehydrogenase, FMO1 - flavin con…
GO:0044429	mitochondrial part	4.95e-08	8.26e-05	1.72	8904	481	1011	94	[HSD17B8 - hydroxysteroid (17-beta) dehydrogenase 8, TOMM40 - translocase of outer mitochondrial membrane 40 homolog (yeast), ACAA2 - acetyl-coa acyltransferase 2, NDUFAF6 - nadh dehydrogenase (ubiquinone) complex i, assembly factor 6, BCKDK - branched chain ketoacid dehydrogenase kinase, NDUFA6 - nadh dehydrogenase (ubiquinone) 1 alpha subcomplex, 6, 14kda, BPHL - biphenyl hydrolase-like (serine…
GO:0005743	mitochondrial inner membrane	1.16e-07	9.71e-05	2.19	8904	189	1011	47	[TOMM40 - translocase of outer mitochondrial membrane 40 homolog (yeast), ERAL1 - era-like 12s mitochondrial rrna chaperone 1, ACAA2 - acetyl-coa acyltransferase 2, MRPL52 - mitochondrial ribosomal protein l52, NDUFAF6 - nadh dehydrogenase (ubiquinone) complex i, assembly factor 6, NDUFA6 - nadh dehydrogenase (ubiquinone) 1 alpha subcomplex, 6, 14kda, NDUFA12 - nadh dehydrogenase (ubiquinone) 1 a…
GO:0019866	organelle inner membrane	8.05e-07	0.000448	2.04	8904	207	1011	48	[TOMM40 - translocase of outer mitochondrial membrane 40 homolog (yeast), EMD - emerin, ERAL1 - era-like 12s mitochondrial rrna chaperone 1, ACAA2 - acetyl-coa acyltransferase 2, MRPL52 - mitochondrial ribosomal protein l52, NDUFAF6 - nadh dehydrogenase (ubiquinone) complex i, assembly factor 6, NDUFA12 - nadh dehydrogenase (ubiquinone) 1 alpha subcomplex, 12, ABCB8 - atp-binding cassette, sub-fa…
GO:0098798	mitochondrial protein complex	1.21e-06	0.000506	3.56	8904	42	1011	17	[BAX - bcl2-associated x protein, NDUFB10 - nadh dehydrogenase (ubiquinone) 1 beta subcomplex, 10, 22kda, TOMM40 - translocase of outer mitochondrial membrane 40 homolog (yeast), PINK1 - pten induced putative kinase 1, TOMM40L - translocase of outer mitochondrial membrane 40 homolog (yeast)-like, ATP5J - atp synthase, h+ transporting, mitochondrial fo complex, subunit f6, BCKDK - branched chain k…
GO:0044455	mitochondrial membrane part	1.3e-06	0.000433	2.98	8904	65	1011	22	[NDUFB10 - nadh dehydrogenase (ubiquinone) 1 beta subcomplex, 10, 22kda, TOMM40 - translocase of outer mitochondrial membrane 40 homolog (yeast), FIS1 - fission 1 (mitochondrial outer membrane) homolog (s. cerevisiae), PINK1 - pten induced putative kinase 1, TOMM40L - translocase of outer mitochondrial membrane 40 homolog (yeast)-like, MUL1 - mitochondrial e3 ubiquitin protein ligase 1, ATP5J - a…
GO:0043233	organelle lumen	1.92e-06	0.000532	1.52	8904	662	1011	114	[PDIA4 - protein disulfide isomerase family a, member 4, BCKDK - branched chain ketoacid dehydrogenase kinase, FMO1 - flavin containing monooxygenase 1, PDIA5 - protein disulfide isomerase family a, member 5, COQ3 - coenzyme q3 methyltransferase, ANO8 - anoctamin 8, NUDT19 - nudix (nucleoside diphosphate linked moiety x)-type motif 19, RCN3 - reticulocalbin 3, ef-hand calcium binding domain, CHCH…
GO:0070013	intracellular organelle lumen	1.92e-06	0.000456	1.52	8904	662	1011	114	[PDIA4 - protein disulfide isomerase family a, member 4, BCKDK - branched chain ketoacid dehydrogenase kinase, FMO1 - flavin containing monooxygenase 1, PDIA5 - protein disulfide isomerase family a, member 5, COQ3 - coenzyme q3 methyltransferase, ANO8 - anoctamin 8, NUDT19 - nudix (nucleoside diphosphate linked moiety x)-type motif 19, RCN3 - reticulocalbin 3, ef-hand calcium binding domain, CHCH…
GO:0031974	membrane-enclosed lumen	1.92e-06	0.000399	1.52	8904	662	1011	114	[PDIA4 - protein disulfide isomerase family a, member 4, BCKDK - branched chain ketoacid dehydrogenase kinase, FMO1 - flavin containing monooxygenase 1, PDIA5 - protein disulfide isomerase family a, member 5, COQ3 - coenzyme q3 methyltransferase, ANO8 - anoctamin 8, NUDT19 - nudix (nucleoside diphosphate linked moiety x)-type motif 19, RCN3 - reticulocalbin 3, ef-hand calcium binding domain, CHCH…
GO:0031966	mitochondrial membrane	3.45e-06	0.00064	1.8	8904	294	1011	60	[TOMM40 - translocase of outer mitochondrial membrane 40 homolog (yeast), ACAA2 - acetyl-coa acyltransferase 2, NDUFAF6 - nadh dehydrogenase (ubiquinone) complex i, assembly factor 6, BPHL - biphenyl hydrolase-like (serine hydrolase), NDUFA6 - nadh dehydrogenase (ubiquinone) 1 alpha subcomplex, 6, 14kda, ATP5S - atp synthase, h+ transporting, mitochondrial fo complex, subunit s (factor b), NIPSNA…
GO:0044437	vacuolar part	1.67e-05	0.00278	1.7	8904	322	1011	62	[AP2A1 - adaptor-related protein complex 2, alpha 1 subunit, ITM2C - integral membrane protein 2c, SLC2A8 - solute carrier family 2 (facilitated glucose transporter), member 8, STARD3 - star-related lipid transfer (start) domain containing 3, RAB14 - rab14, member ras oncogene family, ATP6V0D1 - atpase, h+ transporting, lysosomal 38kda, v0 subunit d1, PSEN2 - presenilin 2 (alzheimer disease 4), T…
GO:0098805	whole membrane	4.9e-05	0.00743	1.41	8904	724	1011	116	[TMEM163 - transmembrane protein 163, SNF8 - snf8, escrt-ii complex subunit, EMD - emerin, ITM2C - integral membrane protein 2c, KDELR1 - kdel (lys-asp-glu-leu) endoplasmic reticulum protein retention receptor 1, SEMA4C - sema domain, immunoglobulin domain (ig), transmembrane domain (tm) and short cytoplasmic domain, (semaphorin) 4c, STARD3 - star-related lipid transfer (start) domain containing …
GO:0005774	vacuolar membrane	7.45e-05	0.0104	1.75	8904	236	1011	47	[AP2A1 - adaptor-related protein complex 2, alpha 1 subunit, SLC35F6 - solute carrier family 35, member f6, MCOLN1 - mucolipin 1, MARCH2 - membrane-associated ring finger (c3hc4) 2, e3 ubiquitin protein ligase, ITM2C - integral membrane protein 2c, SLC2A8 - solute carrier family 2 (facilitated glucose transporter), member 8, STARD3 - star-related lipid transfer (start) domain containing 3, LPCAT1…

## Sheet: Primate downregulated, testis
GO Term	Description	P-value	FDR q-value	Enrichment	N	B	n	b	Genes
GO:0007017	microtubule-based process	3.14e-07	0.00418	2.27	9523	342	527	43	[DST - dystonin, MAK - male germ cell-associated kinase, BIRC5 - baculoviral iap repeat containing 5, RSPH9 - radial spoke head 9 homolog (chlamydomonas), CENPE - centromere protein e, 312kda, KIFAP3 - kinesin-associated protein 3, CAMSAP2 - calmodulin regulated spectrin-associated protein family, member 2, GCC2 - grip and coiled-coil domain containing 2, FYCO1 - fyve and coiled-coil domain conta…
GO:0007018	microtubule-based movement	4.23e-07	0.00282	3.07	9523	147	527	25	[DST - dystonin, MAK - male germ cell-associated kinase, CENPE - centromere protein e, 312kda, KIFAP3 - kinesin-associated protein 3, RSPH9 - radial spoke head 9 homolog (chlamydomonas), FYCO1 - fyve and coiled-coil domain containing 1, TEKT3 - tektin 3, WDR78 - wd repeat domain 78, KIF1B - kinesin family member 1b, DYNLL2 - dynein, light chain, lc8-type 2, IFT74 - intraflagellar transport 74 hom…
GO:0031503	protein complex localization	6.91e-07	0.00307	4.77	9523	53	527	14	[MAK - male germ cell-associated kinase, CEP72 - centrosomal protein 72kda, BIRC5 - baculoviral iap repeat containing 5, KIF17 - kinesin family member 17, KIFAP3 - kinesin-associated protein 3, SNAPIN - snap-associated protein, DYNLL2 - dynein, light chain, lc8-type 2, IFT74 - intraflagellar transport 74 homolog (chlamydomonas), SSX2IP - synovial sarcoma, x breakpoint 2 interacting protein, IFT81…
GO:0035735	intraciliary transport involved in cilium assembly	8.69e-06	0.0289	6.02	9523	27	527	9	[DYNLL2 - dynein, light chain, lc8-type 2, IFT74 - intraflagellar transport 74 homolog (chlamydomonas), IFT81 - intraflagellar transport 81 homolog (chlamydomonas), SSX2IP - synovial sarcoma, x breakpoint 2 interacting protein, KIF3A - kinesin family member 3a, KIF17 - kinesin family member 17, KIFAP3 - kinesin-associated protein 3, IFT52 - intraflagellar transport 52 homolog (chlamydomonas), KIF…
GO:0042073	intraciliary transport	9.7e-06	0.0259	5.31	9523	34	527	10	[DYNLL2 - dynein, light chain, lc8-type 2, IFT74 - intraflagellar transport 74 homolog (chlamydomonas), IFT81 - intraflagellar transport 81 homolog (chlamydomonas), SSX2IP - synovial sarcoma, x breakpoint 2 interacting protein, MAK - male germ cell-associated kinase, KIF3A - kinesin family member 3a, KIF17 - kinesin family member 17, KIFAP3 - kinesin-associated protein 3, IFT52 - intraflagellar t…
GO:0007283	spermatogenesis	1.26e-05	0.028	2.41	9523	210	527	28	[PRSS42 - protease, serine, 42, MROH2B - maestro heat-like repeat family member 2b, MAK - male germ cell-associated kinase, ADAMTS2 - adam metallopeptidase with thrombospondin type 1 motif, 2, TDRP - testis development related protein, TDRD7 - tudor domain containing 7, UBE2B - ubiquitin-conjugating enzyme e2b, TXNDC8 - thioredoxin domain containing 8 (spermatozoa), PGAM2 - phosphoglycerate mutas…
GO:0099111	microtubule-based transport	1.41e-05	0.0269	3.57	9523	76	527	15	[DST - dystonin, MAK - male germ cell-associated kinase, KIF17 - kinesin family member 17, KIFAP3 - kinesin-associated protein 3, FYCO1 - fyve and coiled-coil domain containing 1, SNAPIN - snap-associated protein, KIF1B - kinesin family member 1b, DYNLL2 - dynein, light chain, lc8-type 2, IFT74 - intraflagellar transport 74 homolog (chlamydomonas), SSX2IP - synovial sarcoma, x breakpoint 2 intera…
GO:0010970	transport along microtubule	1.41e-05	0.0235	3.57	9523	76	527	15	[DST - dystonin, MAK - male germ cell-associated kinase, KIF17 - kinesin family member 17, KIFAP3 - kinesin-associated protein 3, FYCO1 - fyve and coiled-coil domain containing 1, SNAPIN - snap-associated protein, KIF1B - kinesin family member 1b, DYNLL2 - dynein, light chain, lc8-type 2, IFT74 - intraflagellar transport 74 homolog (chlamydomonas), SSX2IP - synovial sarcoma, x breakpoint 2 intera…
GO:0048232	male gamete generation	1.51e-05	0.0224	2.39	9523	212	527	28	[PRSS42 - protease, serine, 42, MROH2B - maestro heat-like repeat family member 2b, MAK - male germ cell-associated kinase, ADAMTS2 - adam metallopeptidase with thrombospondin type 1 motif, 2, TDRP - testis development related protein, TDRD7 - tudor domain containing 7, UBE2B - ubiquitin-conjugating enzyme e2b, TXNDC8 - thioredoxin domain containing 8 (spermatozoa), PGAM2 - phosphoglycerate mutas…
GO:0099118	microtubule-based protein transport	1.7e-05	0.0227	5.02	9523	36	527	10	[DYNLL2 - dynein, light chain, lc8-type 2, IFT74 - intraflagellar transport 74 homolog (chlamydomonas), IFT81 - intraflagellar transport 81 homolog (chlamydomonas), SSX2IP - synovial sarcoma, x breakpoint 2 interacting protein, MAK - male germ cell-associated kinase, KIF3A - kinesin family member 3a, KIF17 - kinesin family member 17, KIFAP3 - kinesin-associated protein 3, IFT52 - intraflagellar t…
GO:0098840	protein transport along microtubule	1.7e-05	0.0206	5.02	9523	36	527	10	[DYNLL2 - dynein, light chain, lc8-type 2, IFT74 - intraflagellar transport 74 homolog (chlamydomonas), IFT81 - intraflagellar transport 81 homolog (chlamydomonas), SSX2IP - synovial sarcoma, x breakpoint 2 interacting protein, MAK - male germ cell-associated kinase, KIF3A - kinesin family member 3a, KIF17 - kinesin family member 17, KIFAP3 - kinesin-associated protein 3, IFT52 - intraflagellar t…
GO:0007276	gamete generation	2.83e-05	0.0314	2.27	9523	231	527	29	[PRSS42 - protease, serine, 42, MROH2B - maestro heat-like repeat family member 2b, MAK - male germ cell-associated kinase, ADAMTS2 - adam metallopeptidase with thrombospondin type 1 motif, 2, TDRP - testis development related protein, TDRD7 - tudor domain containing 7, UBE2B - ubiquitin-conjugating enzyme e2b, TXNDC8 - thioredoxin domain containing 8 (spermatozoa), PGAM2 - phosphoglycerate mutas…
GO:0022412	cellular process involved in reproduction in multicellular organism	3.51e-05	0.036	2.42	9523	187	527	25	[PRSS42 - protease, serine, 42, TOPAZ1 - testis and ovary specific paz domain containing 1, UBE2B - ubiquitin-conjugating enzyme e2b, KLHL10 - kelch-like family member 10, TXNDC8 - thioredoxin domain containing 8 (spermatozoa), PLD6 - phospholipase d family, member 6, MYBL1 - v-myb avian myeloblastosis viral oncogene homolog-like 1, TDRD1 - tudor domain containing 1, ICA1L - islet cell autoantige…
GO:0070925	organelle assembly	5.28e-05	0.0502	2.07	9523	288	527	33	[BMS1 - bms1 ribosome biogenesis factor, MAK - male germ cell-associated kinase, BIRC5 - baculoviral iap repeat containing 5, RSPH9 - radial spoke head 9 homolog (chlamydomonas), CENPE - centromere protein e, 312kda, CEP89 - centrosomal protein 89kda, TEKT3 - tektin 3, RC3H1 - ring finger and ccch-type domains 1, TXNDC8 - thioredoxin domain containing 8 (spermatozoa), TRAPPC6A - trafficking prote…
GO:0030705	cytoskeleton-dependent intracellular transport	8.53e-05	0.0758	3.08	9523	88	527	15	[DST - dystonin, MAK - male germ cell-associated kinase, KIF17 - kinesin family member 17, KIFAP3 - kinesin-associated protein 3, FYCO1 - fyve and coiled-coil domain containing 1, SNAPIN - snap-associated protein, KIF1B - kinesin family member 1b, DYNLL2 - dynein, light chain, lc8-type 2, IFT74 - intraflagellar transport 74 homolog (chlamydomonas), SSX2IP - synovial sarcoma, x breakpoint 2 intera…
GO:0044441	ciliary part	5.17e-06	0.00876	2.35	9523	246	527	32	[CNGB1 - cyclic nucleotide gated channel beta 1, MROH2B - maestro heat-like repeat family member 2b, MAK - male germ cell-associated kinase, RSPH9 - radial spoke head 9 homolog (chlamydomonas), KIFAP3 - kinesin-associated protein 3, CEP89 - centrosomal protein 89kda, WDR78 - wd repeat domain 78, SPATA6 - spermatogenesis associated 6, DYNLL2 - dynein, light chain, lc8-type 2, IFT74 - intraflagella…
GO:0044430	cytoskeletal part	1.13e-05	0.00957	1.6	9523	917	527	81	[TIAM1 - t-cell lymphoma invasion and metastasis 1, DST - dystonin, MAK - male germ cell-associated kinase, BIRC5 - baculoviral iap repeat containing 5, CHAMP1 - chromosome alignment maintaining phosphoprotein 1, CAMSAP2 - calmodulin regulated spectrin-associated protein family, member 2, KIFAP3 - kinesin-associated protein 3, CEP89 - centrosomal protein 89kda, LRRC16A - leucine rich repeat conta…
GO:0097223	sperm part	1.51e-05	0.00853	3.23	9523	95	527	17	[FNDC3A - fibronectin type iii domain containing 3a, SPA17 - sperm autoantigenic protein 17, MROH2B - maestro heat-like repeat family member 2b, AKAP3 - a kinase (prka) anchor protein 3, EQTN - equatorin, sperm acrosome associated, TEKT3 - tektin 3, CCDC181 - coiled-coil domain containing 181, TXNDC8 - thioredoxin domain containing 8 (spermatozoa), FAM170B - family with sequence similarity 170, m…
GO:0031514	motile cilium	1.52e-05	0.00644	3.98	9523	59	527	13	[MROH2B - maestro heat-like repeat family member 2b, SPA17 - sperm autoantigenic protein 17, FSCB - fibrous sheath cabyr binding protein, RSPH9 - radial spoke head 9 homolog (chlamydomonas), CEP89 - centrosomal protein 89kda, TEKT3 - tektin 3, CCDC181 - coiled-coil domain containing 181, TXNDC8 - thioredoxin domain containing 8 (spermatozoa), IFT74 - intraflagellar transport 74 homolog (chlamydom…
GO:0005694	chromosome	3.74e-05	0.0127	2.81	9523	122	527	19	[MDC1 - mediator of dna-damage checkpoint 1, RAD1 - rad1 homolog (s. pombe), RIF1 - rap1 interacting factor homolog (yeast), BIRC5 - baculoviral iap repeat containing 5, CHAMP1 - chromosome alignment maintaining phosphoprotein 1, KIFAP3 - kinesin-associated protein 3, PBX4 - pre-b-cell leukemia homeobox 4, CENPE - centromere protein e, 312kda, USP7 - ubiquitin specific peptidase 7 (herpes virus-a…
GO:0005875	microtubule associated complex	7.52e-05	0.0213	2.98	9523	97	527	16	[BIRC5 - baculoviral iap repeat containing 5, SNX4 - sorting nexin 4, KIF17 - kinesin family member 17, KIFAP3 - kinesin-associated protein 3, CENPE - centromere protein e, 312kda, WDR78 - wd repeat domain 78, KIF1B - kinesin family member 1b, DYNLL2 - dynein, light chain, lc8-type 2, KIF3A - kinesin family member 3a, DNAH3 - dynein, axonemal, heavy chain 3, KATNB1 - katanin p80 (wd repeat contai…
GO:0032391	photoreceptor connecting cilium	8.99e-05	0.0218	6.02	9523	21	527	7	[SPATA7 - spermatogenesis associated 7, KIF17 - kinesin family member 17, KIFAP3 - kinesin-associated protein 3, IFT52 - intraflagellar transport 52 homolog (chlamydomonas), FAM161A - family with sequence similarity 161, member a, RPGRIP1 - retinitis pigmentosa gtpase regulator interacting protein 1, TOPORS - topoisomerase i binding, arginine/serine-rich, e3 ubiquitin protein ligase]
